# Supplementary material for: Growth disrupting mutations in epigenetic regulatory molecules are associated with abnormalities of epigenetic aging
Source: Genome Res. 2019 Jul;29(7):1057–66. doi: 10.1101/gr.243584.118 (PMC6633263; doi:10.1101/gr.243584.118)
Supplement: Supplemental Material [file supp_gr.243584.118_Supplemental_Table_S1.xlsx]

## Sheet: Legend
Supplemental Table S1 - List of differentially methylated positions (DMPs) detected in the Amish DNMT3A c.2312G>A; p.(Arg771Gln) variant carriers vs wildtype
LEGEND:
TargetID				Limma output - Probe ID
FC				Limma output - delta beta (degree of change in methylation) between Amish DNMT3A c.2312G>A; p.(Arg771Gln) variant carriers vs wildtype
t				Limma output - t value
P.Value				Limma output - p value
adj.P.Val				Limma output - adjusted p-value
B				Limma output - B value
CHR_37				Chromosome on Genome build 37
Position				Position of probe
Strand				Strand
UCSC_RefGene_Name				Gene symbols close to/overlapping probe
UCSC_RefGene_Accession				Accession numbers of transcripts close to/overlapping probe
UCSC_RefGene_Group				Post of probe relative to gene
UCSC_CpG_Islands_Name				Coordinate of CpG island
Relation_to_UCSC_CpG_Island				Position of probe relative to CpG island
Phantom				FANTOM4 annotation
DMR				Experimentally determined DMRs
Enhancer				Predicted enhancer elements
Regulatory_Feature_Name				Chromosomal map coordinates of the regulatory feature (determined by theENCODE Consortium using informatics).
Regulatory_Feature_Group				Description of the regulatory feature referenced in “Regulatory_Feature_Name” as provided by the Methylation Consortium.
Closest_TSS_gene_name				Name of gene with the closest transcriptional start site to the probe
Closest_TSS_Transcript				Accession number of the transcript with the closest transcriptional start site to the probe

## Sheet: Significant probes
TargetID	FC	t	P.Value	adj.P.Val	B	CHR_37	Position	Strand	UCSC_RefGene_Name	UCSC_RefGene_Accession	UCSC_RefGene_Group	UCSC_CpG_Islands_Name	Relation_to_UCSC_CpG_Island	Phantom	DMR	Enhancer	Regulatory_Feature_Name	Regulatory_Feature_Group	Closest_TSS_gene_name	Closest_TSS_Transcript
cg23804921	-0.452489	-45.6001	1.11591e-13	4.62179e-08	16.8321	15	30861172	F				chr15:30864782-30865586	N_Shelf			NA			DQ575576	DQ575576
cg24146100	-0.24277	-19.7443	8.28546e-10	0.000132294	12.2446	13	99737448	R	DOCK9;DOCK9	NM_015296;NM_001130049	Body;Body	chr13:99738331-99740225	N_Shore		RDMR	NA			DOCK9	NM_001130049
cg02486855	-0.44949	-19.4729	9.58256e-10	0.000132294	12.1379	15	67356942	F	SMAD3	NM_005902	TSS1500	chr15:67357339-67359061	N_Shore		RDMR	NA			SMAD3	NM_005902
cg11106117	-0.156152	-18.4124	1.72412e-09	0.000166958	11.698	5	139491230	R				chr5:139492723-139492966	N_Shore		RDMR	NA			PURA	NM_005859
cg12902206	-0.170707	-18.1398	2.01556e-09	0.000166958	11.5785	3	52351487	F	DNAH1	NM_015512	5'UTR					NA	3:52351326-52352105	Unclassified_Cell_type_specific	DNAH1	AK125990
cg01251360	-0.213046	-17.1029	3.72717e-09	0.000222353	11.0985	16	68772225	F	CDH1	NM_004360	Body	chr16:68771034-68772344	Island			NA	16:68770957-68772797	Unclassified	CDH1	NM_004360
cg02947450	-0.249918	-16.8624	4.31996e-09	0.000222353	10.981	10	22766861	R				chr10:22764708-22767050	Island			NA			LOC100499489	NR_036533
cg23239647	-0.125389	-16.797	4.49827e-09	0.000222353	10.9487	2	105273411	F				chr2:105275588-105275940	N_Shelf			NA			LOC284998	AX746619
cg01635555	-0.290089	-16.5979	5.09276e-09	0.000222353	10.849	16	73101264	R				chr16:73099812-73100791	S_Shore		RDMR	NA			ZFHX3	NM_001164766
cg07168556	-0.173134	-16.514	5.36861e-09	0.000222353	10.8065	17	48912483	R	WFIKKN2	NM_175575	TSS200					TRUE			WFIKKN2	NM_175575
cg23731272	-0.431241	-16.0654	7.14737e-09	0.000251744	10.5739	15	67356838	R	SMAD3	NM_005902	TSS1500	chr15:67357339-67359061	N_Shore		RDMR	NA			SMAD3	NM_005902
cg27565650	-0.31289	-15.9994	7.45933e-09	0.000251744	10.5389	1	88151065	F								TRUE			5S_rRNA	.
cg01817364	-0.230489	-15.8076	8.45289e-09	0.000251744	10.4361	5	43037411	F				chr5:43037259-43037520	Island		CDMR	NA	5:43036507-43037801	Promoter_Associated_Cell_type_specific	C5orf39	NM_001014279
cg27020362	-0.129748	-15.6659	9.27983e-09	0.000251744	10.3591	5	138723394	R	MGC29506	NM_016459	3'UTR					NA			MZB1	AF151024
cg20055237	-0.249453	-15.6123	9.61549e-09	0.000251744	10.3296	2	240362425	R								TRUE			HDAC4	AK308791
cg21010202	-0.344995	-15.5952	9.72521e-09	0.000251744	10.3202	6	1615843	F				chr6:1604606-1615866	Island		RDMR	NA			FOXC1	NM_001453
cg11556846	-0.249571	-15.3714	1.12946e-08	0.00026232	10.1957	2	200468728	R				chr2:200468551-200468958	Island			NA			BC035629	BC035629
cg21109038	-0.173843	-15.3504	1.14554e-08	0.00026232	10.1839	15	90543610	R	ZNF710	NM_198526	TSS1500	chr15:90543410-90543835	Island			NA			ZNF710	NM_198526
cg18346398	-0.271024	-15.2492	1.22663e-08	0.00026232	10.1267	6	1615992	F				chr6:1604606-1615866	S_Shore		RDMR	NA			FOXC1	NM_001453
cg06767142	-0.117684	-15.2019	1.26672e-08	0.00026232	10.0998	11	63821400	F	MACROD1	NM_014067	Body					TRUE			FLRT1	NM_013280
cg00970752	-0.242206	-14.7201	1.76623e-08	0.000346049	9.81905	1	15711443	R	FHAD1	NM_052929	Body					TRUE			FHAD1	BC027293
cg19512582	-0.145739	-14.6522	1.85246e-08	0.000346049	9.77849	14	61083516	F								TRUE			SIX1	NM_005982
cg09501821	-0.282539	-14.6001	1.92169e-08	0.000346049	9.74722	15	67356387	F				chr15:67357339-67359061	N_Shore		RDMR	NA			SMAD3	NM_005902
cg20595752	-0.228895	-14.3598	2.27969e-08	0.00039341	9.60101	6	35458416	R	TEAD3	NM_003214	5'UTR	chr6:35453776-35454435	S_Shelf			TRUE			TEAD3	BC027877
cg05865340	-0.211291	-14.2362	2.49154e-08	0.000412771	9.52457	2	240362550	R								TRUE			HDAC4	AK308791
cg20356637	-0.26862	-14.0192	2.91714e-08	0.000460829	9.3883	15	67356310	R				chr15:67357339-67359061	N_Shore		RDMR	NA			SMAD3	NM_005902
cg05224659	-0.24027	-13.9791	3.00416e-08	0.000460829	9.36281	2	43295595	R				chr2:43295212-43295555	S_Shore			TRUE			ZFP36L2	NM_006887
cg09898695	-0.116372	-13.8822	3.22628e-08	0.000477226	9.30085	15	41135793	F	SPINT1;SPINT1;SPINT1	NM_003710;NM_001032367;NM_181642	TSS1500;TSS1500;TSS1500	chr15:41135719-41137210	Island		DMR	NA	15:41135661-41137383	Unclassified_Cell_type_specific	SPINT1	NM_181642
cg24765079	-0.183649	-13.6849	3.73593e-08	0.000531393	9.17293	16	68772430	F	CDH1	NM_004360	Body	chr16:68771034-68772344	S_Shore			NA	16:68770957-68772797	Unclassified	CDH1	NM_004360
cg10456121	-0.19071	-13.631	3.88998e-08	0.000531393	9.13757	2	177355281	R				chr2:177355071-177355525	Island			TRUE			MIR1246	NR_031648
cg09565002	-0.14805	-13.6014	3.97738e-08	0.000531393	9.11811	4	15939889	F	FGFBP1;FGFBP1	NM_005130;NM_005130	1stExon;5'UTR					TRUE			FGFBP1	NM_005130
cg13105599	-0.375627	-13.5528	4.12584e-08	0.000534003	9.08597	15	67356641	R				chr15:67357339-67359061	N_Shore		RDMR	NA			SMAD3	NM_005902
cg16876823	-0.163088	-13.3294	4.88964e-08	0.000572183	8.9365	19	2987082	R	TLE6;TLE6	NM_024760;NM_001143986	Body;Body					TRUE			TLE6	NM_001143986
cg06769918	-0.180834	-13.2635	5.14328e-08	0.000572183	8.89182	6	13015005	F	PHACTR1	NM_030948	Body	chr6:13014973-13015203	Island			TRUE			LOC100130357	NM_001242698
cg02150077	-0.265619	-13.2633	5.14428e-08	0.000572183	8.89165	16	87098542	F								NA			AK125749	AK125749
cg04268624	-0.264756	-13.2616	5.15099e-08	0.000572183	8.8905	5	43037285	F				chr5:43037259-43037520	Island		CDMR	NA	5:43036507-43037801	Promoter_Associated_Cell_type_specific	C5orf39	NM_001014279
cg08657654	-0.305345	-13.2535	5.18324e-08	0.000572183	8.88498	7	27138974	F				chr7:27135342-27136736	S_Shelf		RDMR	NA			HOTAIRM1	NR_038366
cg25702652	-0.181133	-13.2354	5.25572e-08	0.000572183	8.8727	2	164204628	R				chr2:164204740-164205039	N_Shore			TRUE			FIGN	NM_018086
cg06634862	-0.227348	-13.2033	5.38789e-08	0.000572183	8.85071	4	54457645	R	LNX1;LNX1	NM_001126328;NM_001126328	5'UTR;1stExon					TRUE			LNX1	NM_001126328
cg05499367	-0.121747	-12.9425	6.60223e-08	0.000668389	8.67013	10	63213510	R	TMEM26	NM_178505	TSS1500	chr10:63212495-63213009	S_Shore		RDMR	NA			TMEM26	BC042872
cg13647973	-0.108729	-12.9397	6.61657e-08	0.000668389	8.66819	19	56061337	F				chr19:56061261-56061516	Island			NA			SGK110	NM_001199824
cg20364512	-0.193209	-12.8765	6.95495e-08	0.000685844	8.62369	22	28199338	R				chr22:28192793-28198592	S_Shore		CDMR	TRUE			MN1	NM_002430
cg05644462	-0.135751	-12.6627	8.24499e-08	0.000782166	8.47135	16	85261785	F								TRUE	16:85260344-85262498	Unclassified	LINC00311	NR_038859
cg01342115	-0.224091	-12.6529	8.30943e-08	0.000782166	8.46436	3	134031663	R				chr3:134031662-134032591	Island			NA			AMOTL2	AK091040
cg11324650	-0.32249	-12.6071	8.62097e-08	0.000793459	8.43129	3	194014745	F				chr3:194014480-194014983	Island			NA			LOC100131551	NR_024480
cg23810282	-0.249062	-12.5068	9.34857e-08	0.000831116	8.35836	5	43037519	F				chr5:43037259-43037520	Island		CDMR	NA	5:43036507-43037801	Promoter_Associated_Cell_type_specific	C5orf39	NM_001014279
cg10690919	-0.194658	-12.4776	9.57321e-08	0.000831116	8.33695	17	48912545	R	WFIKKN2	NM_175575	TSS200					TRUE			WFIKKN2	NM_175575
cg27300028	-0.147466	-12.47	9.63212e-08	0.000831116	8.33142	13	100312810	R	CLYBL	NM_206808	Body	chr13:100310204-100310446	S_Shelf			NA	13:100312725-100312866	Unclassified_Cell_type_specific	MIR4306	NR_036191
cg16508883	-0.149048	-12.4061	1.01469e-07	0.000857664	8.28442	1	145092330	R								NA			SEC22B	NM_004892
cg16624069	-0.235272	-12.3257	1.08373e-07	0.000877572	8.22489	13	99630210	R	DOCK9;DOCK9;DOCK9;DOCK9;DOCK9;DOCK9	NM_015296;NM_001130050;NM_001130050;NM_001130049;NM_001130048;NM_001130048	Body;5'UTR;1stExon;Body;5'UTR;1stExon					TRUE	13:99630180-99630217	Unclassified_Cell_type_specific	DOCK9	NM_001130050
cg13058819	-0.158162	-12.3172	1.09131e-07	0.000877572	8.21858	1	234350834	R	SLC35F3	NM_173508	Body	chr1:234349884-234350471	S_Shore			NA			AK054726	AK054726
cg26635451	-0.144201	-12.3056	1.10181e-07	0.000877572	8.20991	12	89749142	F				chr12:89745168-89748144	S_Shore		CDMR	NA	12:89747962-89749741	Promoter_Associated	DUSP6	NM_022652
cg25042226	-0.137858	-12.2734	1.13136e-07	0.000884111	8.18593	2	114036571	R	PAX8;PAX8;PAX8;LOC440839;PAX8;PAX8	NM_013953;NM_013992;NM_013951;NR_029399;NM_013952;NM_003466	TSS200;TSS200;TSS200;Body;TSS200;TSS200	chr2:114034594-114036041	S_Shore			NA			PAX8	NM_003466
cg01205935	-0.298874	-12.2126	1.18961e-07	0.000907301	8.14039	13	99737585	F	DOCK9;DOCK9	NM_015296;NM_001130049	Body;Body	chr13:99738331-99740225	N_Shore		RDMR	NA			DOCK9	NM_001130049
cg18136963	-0.182698	-12.1761	1.22618e-07	0.000907301	8.11289	6	139013146	F				chr6:139013563-139014881	N_Shore			NA	6:139012853-139014693	Unclassified	FLJ46906	BC104461
cg24177393	-0.223001	-12.1506	1.25247e-07	0.000907301	8.09361	5	43037517	F				chr5:43037259-43037520	Island		CDMR	NA	5:43036507-43037801	Promoter_Associated_Cell_type_specific	C5orf39	NM_001014279
cg06626847	-0.17954	-12.1156	1.28942e-07	0.000907301	8.06717	1	149333142	F				chr1:149332993-149333389	Island			NA			TRNA_Glu	.
cg11526630	-0.191534	-12.0872	1.32038e-07	0.000907301	8.04558	7	4845567	F	RADIL	NM_018059	Body	chr7:4848251-4849204	N_Shelf			NA			RADIL	BC004919
cg19228034	-0.198702	-12.0737	1.33539e-07	0.000907301	8.03528	7	92672812	R				chr7:92672789-92673016	Island			NA			SAMD9	CCDS34680
cg15478483	-0.238287	-12.0643	1.34586e-07	0.000907301	8.02817	6	111936529	R								TRUE			TRAF3IP2	AK310922
cg09113483	-0.349591	-12.0497	1.36238e-07	0.000907301	8.01705	1	61517807	R				chr1:61519352-61519971	N_Shore			NA			NFIA	NM_001145511
cg06893273	-0.197855	-12.0389	1.37481e-07	0.000907301	8.00878	17	46604774	F				chr17:46604362-46604881	Island			NA			HOXB1	BC099633
cg23210521	-0.187011	-12.0343	1.3801e-07	0.000907301	8.00527	4	95680414	F	BMPR1B	NM_001203	5'UTR	chr4:95678798-95679809	S_Shore		RDMR	NA			BMPR1B	NM_001203
cg16179507	-0.132639	-11.971	1.45557e-07	0.00093627	7.9567	2	43295306	R				chr2:43295212-43295555	Island			TRUE			ZFP36L2	NM_006887
cg19264571	-0.194577	-11.9598	1.46938e-07	0.00093627	7.94808	18	10454085	F	APCDD1	NM_153000	TSS1500	chr18:10454082-10454296	Island		RDMR	NA			APCDD1	NM_153000
cg05272827	-0.22301	-11.935	1.50043e-07	0.000938558	7.92897	17	79380706	F	BAHCC1	NM_001080519	Body	chr17:79380359-79380723	Island			NA			MIR4740	NR_039894
cg18900591	-0.148942	-11.9036	1.54083e-07	0.000938558	7.90468	20	50419193	F	SALL4	NM_020436	TSS200	chr20:50417312-50419045	S_Shore		RDMR	NA			SALL4	AY170621
cg05349837	-0.147861	-11.8891	1.55983e-07	0.000938558	7.89348	12	54430991	F	HOXC4	NM_014620	5'UTR	chr12:54427025-54428709	S_Shelf			NA			MIR615	NR_030753
cg25835351	-0.27431	-11.8862	1.56361e-07	0.000938558	7.89126	10	13388524	F	SEPHS1	NM_012247	5'UTR					NA			SEPHS1	AK309829
cg24280832	-0.233003	-11.8634	1.59423e-07	0.000943262	7.87352	10	77871958	R	C10orf11	NM_032024	Body	chr10:77872083-77872305	N_Shore			TRUE			Metazoa_SRP	.
cg08202399	-0.124722	-11.8194	1.65491e-07	0.000965379	7.8393	16	14280512	F	MKL2	NM_014048	Body			low-CpG:14187965-14188056		TRUE			MKL2	AX748211
cg02452639	-0.22136	-11.7434	1.76602e-07	0.00101588	7.77971	1	116710227	R				chr1:116710157-116710546	Island			TRUE			MAB21L3	NM_152367
cg19057830	-0.20831	-11.7043	1.82613e-07	0.00103607	7.74897	10	77165673	F	C10orf41;C10orf41	NR_024421;NR_024422	Body;Body	chr10:77155128-77169600	Island		RDMR	NA			ZNF503-AS2	NR_024422
cg07264048	-0.174242	-11.6479	1.91703e-07	0.00107295	7.7043	6	10556326	F	GCNT2;GCNT2;GCNT2	NM_001491;NM_001491;NM_145649	5'UTR;1stExon;Body					TRUE			GCNT2	NM_001491
cg18534077	-0.158004	-11.6157	1.97107e-07	0.00108848	7.67872	10	104628846	F	AS3MT	NM_020682	TSS1500	chr10:104629038-104629479	N_Shore			NA			AS3MT	NM_020682
cg14560430	-0.28101	-11.5991	1.99962e-07	0.00108972	7.66548	3	32863175	R	TRIM71	NM_001039111	Body	chr3:32863174-32863415	Island			NA			TRIM71	NM_001039111
cg08915171	-0.208823	-11.5651	2.05932e-07	0.00110768	7.63837	2	105273376	F				chr2:105275588-105275940	N_Shelf			NA			LOC284998	AX746619
cg26138978	-0.19912	-11.5065	2.16712e-07	0.00113904	7.59131	13	107183092	R	EFNB2	NM_004093	Body	chr13:107186468-107189024	N_Shelf		RDMR	NA			EFNB2	NM_004093
cg25661792	-0.243225	-11.481	2.21588e-07	0.00113904	7.57076	3	194014530	F				chr3:194014480-194014983	Island			NA			LOC100131551	NR_024480
cg01874730	-0.132554	-11.479	2.21977e-07	0.00113904	7.56914	16	57406425	R	CX3CL1;CX3CL1	NM_002996;NM_002996	1stExon;5'UTR					TRUE			CX3CL1	NM_002996
cg24460126	-0.240463	-11.4647	2.24772e-07	0.00113904	7.55759	1	179713828	R	FAM163A	NM_173509	5'UTR	chr1:179711947-179713951	Island			NA			FAM163A	NM_173509
cg25464265	-0.146177	-11.4609	2.25512e-07	0.00113904	7.55455	1	221063484	F				chr1:221064889-221065600	N_Shore		RDMR	NA			HLX	NM_021958
cg02007567	-0.115397	-11.3421	2.50318e-07	0.00124909	7.45799	16	10912696	F	FAM18A	NM_001079512	TSS200	chr16:10912159-10912719	Island			NA			FAM18A	AK124106
cg03765423	-0.254556	-11.2784	2.64837e-07	0.00130079	7.40572	3	194014481	R				chr3:194014480-194014983	Island			NA			LOC100131551	NR_024480
cg25426302	-0.164547	-11.2518	2.71158e-07	0.00130079	7.38383	6	32120826	R	PPT2;PRRT1;PPT2	NM_005155;NM_030651;NM_138717	TSS1500;TSS1500;TSS1500	chr6:32121829-32122529	N_Shore			TRUE	6:32120376-32123743	Promoter_Associated	PRRT1	BC013201
cg02931685	-0.170913	-11.2488	2.71892e-07	0.00130079	7.38132	19	14376360	R				chr19:14376688-14376961	N_Shore			TRUE			LPHN1	NM_001008701
cg05474265	-0.176969	-11.231	2.76224e-07	0.00130079	7.36664	4	81128398	F				chr4:81128229-81128691	Island			NA			PRDM8	NM_001099403
cg19628934	-0.183481	-11.2176	2.79552e-07	0.00130079	7.35551	14	77499391	F				chr14:77499154-77499502	Island			NA	14:77498958-77500734	Promoter_Associated	IRF2BPL	NM_024496
cg15920791	-0.306925	-11.2134	2.80593e-07	0.00130079	7.35206	8	61835708	R				chr8:61834699-61835871	Island		DMR	NA			LOC100130298	NR_034003
cg18861753	-0.207371	-11.2051	2.82663e-07	0.00130079	7.34523	5	178014801	F	COL23A1	NM_173465	Body	chr5:178016558-178017670	N_Shore		RDMR	NA			COL23A1	CCDS4436
cg04017036	-0.218964	-11.1382	3.00098e-07	0.00136377	7.28956	16	73104388	R				chr16:73099812-73100791	S_Shelf			TRUE			ZFHX3	NM_001164766
cg14170999	-0.208625	-11.1175	3.05735e-07	0.00136377	7.27224	17	79380515	R	BAHCC1	NM_001080519	Body	chr17:79380359-79380723	Island			NA			MIR4740	NR_039894
cg10724867	-0.22512	-11.1157	3.06227e-07	0.00136377	7.27074	7	27218867	R	HOXA10	NM_153715	Body	chr7:27219309-27219750	N_Shore			NA	7:27218624-27220804	Unclassified	HOXA10	NR_037939
cg27179622	-0.298182	-11.0142	3.35544e-07	0.00147844	7.1855	1	226127290	F	LEFTY2	NM_003240	Body	chr1:226127112-226127695	Island			NA			LEFTY2	BC065929
cg11291003	-0.179437	-10.9596	3.52593e-07	0.00150664	7.13922	5	134526241	F				chr5:134526927-134527419	N_Shore		CDMR	NA			LOC340073	NR_037895
cg25317631	-0.175499	-10.9529	3.54729e-07	0.00150664	7.13357	11	44541905	F				chr11:44541537-44541956	Island			NA			CD82	NM_001024844
cg01135546	-0.174383	-10.9282	3.62796e-07	0.00150664	7.11255	17	45949828	R				chr17:45949676-45949885	Island			NA			BC031827	BC031827
cg05376267	-0.197386	-10.9267	3.63315e-07	0.00150664	7.11121	1	226075388	R	LEFTY1	NM_020997	Body	chr1:226075150-226075680	Island			NA			LEFTY1	AK309263
cg04459939	-0.187852	-10.9259	3.6357e-07	0.00150664	7.11056	15	90291141	R				chr15:90293221-90294733	N_Shelf		RDMR	TRUE			MESP1	NM_018670
cg24729928	-0.177935	-10.9253	3.63771e-07	0.00150664	7.11004	12	31480184	R	FAM60A;FAM60A;FAM60A	NM_021238;NM_001135812;NM_001135811	TSS1500;TSS1500;TSS1500	chr12:31476717-31479466	S_Shore		RDMR	NA			FAM60A	NM_021238
cg12836958	-0.153898	-10.9127	3.67955e-07	0.00150888	7.09935	4	186132412	R	SNX25	NM_031953	5'UTR	chr4:186130584-186131896	S_Shore		RDMR	NA	4:186132407-186132463	Unclassified_Cell_type_specific	SNX25	NM_031953
cg11412129	-0.221455	-10.8853	3.77298e-07	0.00153202	7.07588	1	88928839	F				chr1:88928283-88928760	S_Shore			NA			Metazoa_SRP	.
cg14181528	-0.137132	-10.8345	3.95268e-07	0.00158941	7.03231	1	19393870	F								TRUE			AX747516	AX747516
cg27312338	-0.172261	-10.8165	4.01849e-07	0.00160033	7.01683	16	57832198	F	KIFC3;KIFC3;KIFC3	NM_001130099;NM_005550;NM_001130100	TSS1500;5'UTR;5'UTR	chr16:57835955-57836989	N_Shelf			NA			KIFC3	DQ426879
cg08820801	-0.139413	-10.8021	4.07206e-07	0.00160622	7.00442	19	39465821	F	FBXO17	NM_024907	5'UTR	chr19:39465846-39466403	N_Shore			NA			FBXO17	NM_024907
cg00597876	-0.215538	-10.7877	4.12625e-07	0.00161224	6.99202	15	74494909	F	STRA6;STRA6;STRA6;STRA6;STRA6	NM_001142617;NM_001142618;NM_001142619;NM_022369;NM_001142620	5'UTR;5'UTR;5'UTR;5'UTR;5'UTR			low-CpG:72281833-72282584		TRUE			STRA6	NM_001199042
cg10775991	-0.0997112	-10.7415	4.30625e-07	0.00162468	6.95195	14	21905945	R	CHD8	NM_020920	TSS1500					NA	14:21904849-21906100	Promoter_Associated	CHD8	NM_020920
cg22877452	-0.333037	-10.7386	4.31776e-07	0.00162468	6.94944	1	61517876	F				chr1:61519352-61519971	N_Shore			NA			NFIA	NM_001145511
cg15720535	-0.267204	-10.7275	4.36203e-07	0.00162468	6.93986	9	139582585	R	AGPAT2;AGPAT2	NM_006412;NM_001012727	TSS1500;TSS1500	chr9:139580969-139582615	Island			NA			AGPAT2	NM_006412
cg07447742	-0.250145	-10.7256	4.36971e-07	0.00162468	6.93821	13	49793170	F	MLNR	NM_001507	TSS1500	chr13:49794125-49795542	N_Shore			NA			MLNR	NM_001507
cg04236334	-0.161508	-10.7243	4.37516e-07	0.00162468	6.93704	1	26487591	F	GRRP1	NM_024869	5'UTR	chr1:26487807-26488606	N_Shore			NA			FAM110D	CCDS41285
cg04396112	-0.339101	-10.7134	4.41953e-07	0.00162468	6.92756	7	2151007	R	MAD1L1;MAD1L1;MAD1L1	NM_003550;NM_001013837;NM_001013836	Body;Body;Body	chr7:2154677-2155252	N_Shelf			NA			MAD1L1	U33822
cg10994149	-0.288533	-10.7102	4.43267e-07	0.00162468	6.92477	5	43037123	F				chr5:43037259-43037520	N_Shore		CDMR	NA	5:43036507-43037801	Promoter_Associated_Cell_type_specific	C5orf39	NM_001014279
cg20593826	-0.222921	-10.6902	4.51562e-07	0.00163431	6.90735	1	59280370	R				chr1:59280240-59280490	Island			TRUE			LOC100131060	NR_034014
cg23225147	-0.122234	-10.6849	4.53788e-07	0.00163431	6.90273	11	2907754	F	CDKN1C;CDKN1C;CDKN1C	NM_000076;NM_001122631;NM_001122630	TSS1500;TSS1500;TSS1500	chr11:2905023-2907024	S_Shore			NA			CDKN1C	NM_001122630
cg14519997	-0.272447	-10.6755	4.57762e-07	0.00163442	6.89453	9	14321079	R				chr9:14322393-14322985	N_Shore			TRUE			NFIB	NM_001190737
cg26942432	-0.272525	-10.6459	4.70566e-07	0.00166577	6.86858	15	99557464	F				chr15:99557978-99559170	N_Shore			NA			PGPEP1L	NM_001167902
cg11914795	-0.0834443	-10.6321	4.7663e-07	0.00167294	6.85653	10	63422555	R	C10orf107	NM_173554	TSS200	chr10:63422538-63423105	Island			TRUE			C10orf107	NM_173554
cg23005885	-0.148669	-10.6	4.91135e-07	0.00170137	6.82831	15	90543450	F	ZNF710	NM_198526	TSS1500	chr15:90543410-90543835	Island			NA			ZNF710	NM_198526
cg08441803	-0.138474	-10.591	4.95288e-07	0.00170137	6.82038	17	46388390	F	SKAP1;SKAP1	NM_003726;NM_001075099	Body;Body					NA			SKAP1	AK290818
cg17516330	-0.166762	-10.5872	4.97053e-07	0.00170137	6.81703	15	74494781	R	STRA6;STRA6;STRA6;STRA6;STRA6	NM_001142617;NM_001142618;NM_001142619;NM_022369;NM_001142620	5'UTR;5'UTR;5'UTR;5'UTR;5'UTR			low-CpG:72281833-72282584		TRUE			STRA6	NM_001199042
cg14992524	-0.136463	-10.5597	5.10034e-07	0.00171743	6.79274	8	10586135	R	SOX7	NM_031439	Body	chr8:10586613-10586886	N_Shore			NA			BC043573	BC043573
cg10613381	-0.174777	-10.5407	5.19189e-07	0.00171743	6.77596	22	24890330	R	C22orf45;C22orf45;UPB1	NR_028484;NR_028483;NM_016327	Body;Body;TSS1500	chr22:24890412-24891453	N_Shore			TRUE			UPB1	NM_016327
cg19214097	-0.104237	-10.5398	5.1965e-07	0.00171743	6.77513	2	202814249	F								TRUE			FZD7	NM_003507
cg08123207	-0.235745	-10.5348	5.22065e-07	0.00171743	6.77075	6	32118312	R	PRRT1	NM_030651	Body	chr6:32118101-32118544	Island			NA			PRRT1	AK123424
cg13422804	-0.145936	-10.534	5.22479e-07	0.00171743	6.77001	9	139582673	F	AGPAT2;AGPAT2	NM_006412;NM_001012727	TSS1500;TSS1500	chr9:139580969-139582615	S_Shore			NA			AGPAT2	NM_006412
cg25001102	-0.125742	-10.5231	5.27852e-07	0.00172143	6.76036	1	221068935	R				chr1:221068782-221069159	Island		RDMR	NA			HLX	NM_021958
cg22685502	-0.125116	-10.5145	5.32143e-07	0.00172186	6.75272	3	72496851	F	RYBP	NM_012234	TSS1500	chr3:72495853-72496852	Island			NA			RYBP	NM_012234
cg27043786	-0.116035	-10.4981	5.40449e-07	0.00173518	6.7381	1	88928647	R				chr1:88928283-88928760	Island			NA			Metazoa_SRP	.
cg25903143	-0.204826	-10.4708	5.54553e-07	0.00176677	6.71378	11	68920466	R								TRUE			BC064339	BC064339
cg07464674	-0.127872	-10.3949	5.95872e-07	0.00186766	6.64586	17	6358363	F	PITPNM3;PITPNM3	NM_001165966;NM_031220	3'UTR;3'UTR	chr17:6358414-6358955	N_Shore			NA			FAM64A	NM_019013
cg22770911	-0.126783	-10.3943	5.96213e-07	0.00186766	6.64532	10	8101307	F	GATA3;GATA3	NM_001002295;NM_002051	Body;Body	chr10:8100384-8100768	S_Shore		RDMR	NA	10:8101119-8101716	Unclassified_Cell_type_specific	GATA3	NM_002051
cg03258665	-0.133326	-10.3788	6.05049e-07	0.00186766	6.6314	1	16472461	R	EPHA2	NM_004431	Body	chr1:16475111-16475324	N_Shelf			TRUE	1:16472401-16472643	Unclassified_Cell_type_specific	EPHA2	EU826606
cg24859236	-0.196845	-10.3756	6.06883e-07	0.00186766	6.62854	1	9750213	F	PIK3CD	NM_005026	5'UTR	chr1:9749295-9750228	Island			NA	1:9748906-9750306	Unclassified	PIK3CD	JN190435
cg09065876	-0.179667	-10.3591	6.16524e-07	0.00186766	6.61363	17	45949756	R				chr17:45949676-45949885	Island			NA			BC031827	BC031827
cg02757970	-0.220411	-10.353	6.20139e-07	0.00186766	6.60809	2	25427350	F				chr2:25427101-25427577	Island			NA	2:25427162-25427848	Unclassified_Cell_type_specific	POMC	BC065832
cg16854876	-0.147889	-10.3488	6.22614e-07	0.00186766	6.60432	4	40752947	F	NSUN7	NM_024677	Body	chr4:40751842-40752493	S_Shore		RDMR	TRUE			NSUN7	BC036568
cg07262247	-0.102957	-10.3424	6.26432e-07	0.00186766	6.59853	5	131593730	F	PDLIM4;PDLIM4	NM_003687;NM_001131027	Body;Body	chr5:131593039-131593813	Island			NA			PDLIM4	AK225407
cg13622265	-0.184267	-10.3392	6.28351e-07	0.00186766	6.59563	9	124584474	R	TTLL11	NM_001139442	3'UTR					NA			DAB2IP	AK124610
cg23923820	-0.135793	-10.3342	6.31312e-07	0.00186766	6.59118	1	155267480	F	PKLR;PKLR	NM_000298;NM_181871	Body;Body	chr1:155264318-155265536	S_Shore			NA			PKLR	AK298399
cg24148304	-0.147341	-10.3096	6.46336e-07	0.00187437	6.5689	6	7544377	F	DSP;DSP	NM_001008844;NM_004415	Body;Body	chr6:7541518-7543472	S_Shore		RDMR	NA			DSP	NM_004415
cg03904291	-0.134954	-10.2974	6.53956e-07	0.00187437	6.5578	11	119019361	F	ABCG4;ABCG4	NM_001142505;NM_022169	TSS1500;TSS1500	chr11:119019643-119020887	N_Shore			NA	11:119019275-119020452	Unclassified_Cell_type_specific	ABCG4	NM_022169
cg26630791	-0.167862	-10.2959	6.54881e-07	0.00187437	6.55646	5	83017000	F	HAPLN1	NM_001884	TSS200	chr5:83017894-83018358	N_Shore			NA			HAPLN1	NM_001884
cg27615366	-0.125974	-10.2958	6.54939e-07	0.00187437	6.55637	5	131592974	R	PDLIM4;PDLIM4	NM_001131027;NM_003687	TSS1500;TSS1500	chr5:131593039-131593813	N_Shore			NA			PDLIM4	AK225407
cg21903286	-0.159214	-10.2934	6.56488e-07	0.00187437	6.55413	12	42876128	F	PRICKLE1;PRICKLE1;PRICKLE1;PRICKLE1	NM_153026;NM_001144881;NM_001144882;NM_001144883	5'UTR;5'UTR;5'UTR;5'UTR	chr12:42876654-42878193	N_Shore			NA	12:42876032-42878260	Unclassified	PRICKLE1	NM_001144881
cg19227031	-0.264829	-10.2809	6.64398e-07	0.00187437	6.54278	6	32118315	R	PRRT1	NM_030651	Body	chr6:32118101-32118544	Island			NA			PRRT1	AK123424
cg07310671	-0.104679	-10.2795	6.6526e-07	0.00187437	6.54155	16	85253980	R								NA			LINC00311	NR_038859
cg03228449	-0.224779	-10.258	6.79159e-07	0.0019006	6.52194	2	216299545	R	FN1;FN1;FN1;FN1;FN1;FN1;FN1	NM_054034;NM_212475;NM_212476;NM_212478;NM_212474;NM_212482;NM_002026	Body;Body;Body;Body;Body;Body;Body	chr2:216300267-216300997	N_Shore		RDMR	NA			FN1	NM_054034
cg06143732	-0.11764	-10.1943	7.22077e-07	0.00200714	6.46378	7	129912803	F	CPA2	NM_001869	Body					TRUE			CPA2	NM_001869
cg22795769	-0.12551	-10.1812	7.31275e-07	0.00201916	6.45176	17	1396123	R	MYO1C;MYO1C	NM_001080779;NM_033375	TSS200;TSS1500	chr17:1394439-1394813	S_Shore			NA			MYO1C	NM_001080779
cg25288155	-0.160115	-10.1641	7.43528e-07	0.00203939	6.43597	11	73357396	F	PLEKHB1;PLEKHB1;PLEKHB1;PLEKHB1;PLEKHB1;PLEKHB1	NM_001130033;NM_021200;NM_021200;NM_001130035;NM_001130034;NM_001130033	5'UTR;1stExon;5'UTR;TSS1500;TSS1500;1stExon				RDMR	NA			PLEKHB1	NM_021200
cg04359418	-0.236509	-10.1466	7.56202e-07	0.00206051	6.4199	10	76573396	R				chr10:76573195-76573507	Island			TRUE			KAT6B	NM_012330
cg16893614	-0.147282	-10.125	7.72263e-07	0.00209052	6.39991	1	110614450	F	ALX3	NM_006492	TSS1500	chr1:110610265-110613303	S_Shore			NA			ALX3	NM_006492
cg08360599	-0.168446	-10.1174	7.7792e-07	0.00209216	6.39297	3	141087261	R	ZBTB38	NM_001080412	5'UTR			low-CpG:142569812-142570106		TRUE			ZBTB38	AK307452
cg17158913	-0.161972	-10.1052	7.8724e-07	0.00210137	6.38164	1	10764886	F	CASZ1;CASZ1	NM_001079843;NM_017766	5'UTR;5'UTR	chr1:10764449-10764925	Island			TRUE			CASZ1	AK293839
cg00567854	-0.0987012	-10.0997	7.91492e-07	0.00210137	6.37652	1	203273693	F	BTG2	NM_006763	TSS1500	chr1:203274305-203275338	N_Shore		CDMR	NA			LOC730227	NR_034150
cg06396119	-0.19754	-10.0809	8.06088e-07	0.00212649	6.35912	13	49792767	R				chr13:49794125-49795542	N_Shore			NA			MLNR	NM_001507
cg07733851	-0.143299	-10.0723	8.12841e-07	0.00213073	6.35118	5	142781498	R	NR3C1;NR3C1;NR3C1;NR3C1;NR3C1;NR3C1;NR3C1	NM_001018076;NM_001020825;NM_000176;NM_001018075;NM_001018077;NM_001024094;NM_001018074	5'UTR;5'UTR;5'UTR;5'UTR;5'UTR;5'UTR;5'UTR	chr5:142782071-142785071	N_Shore		RDMR	NA	5:142781453-142781534	Promoter_Associated_Cell_type_specific	NR3C1	AJ877169
cg07943780	-0.125236	-10.0414	8.37778e-07	0.00218229	6.3224	8	41502612	F				chr8:41503916-41504266	N_Shore			NA	8:41502488-41502614	Unclassified_Cell_type_specific	NKX6-3	NM_152568
cg14485744	-0.160236	-10.0166	8.58325e-07	0.00222184	6.29931	8	119086710	R	EXT1	NM_000127	Body					TRUE			AK025288	AK025288
cg09990613	-0.167462	-10.0004	8.72072e-07	0.0022434	6.28416	20	62688896	F	TCEA2;TCEA2	NM_198723;NM_198723	1stExon;5'UTR	chr20:62688551-62688878	S_Shore			TRUE	20:62688571-62689673	Unclassified	TCEA2	NM_198723
cg20806427	-0.164477	-9.99386	8.77712e-07	0.00224397	6.27801	1	149718671	F				chr1:149718542-149718918	Island			NA			TRNA_Glu	.
cg09174162	-0.288545	-9.97423	8.94806e-07	0.00226992	6.25962	7	2150845	F	MAD1L1;MAD1L1;MAD1L1	NM_003550;NM_001013837;NM_001013836	Body;Body;Body	chr7:2154677-2155252	N_Shelf			NA			MAD1L1	U33822
cg20531550	-0.184759	-9.96968	8.9882e-07	0.00226992	6.25534	7	128550902	F	KCP;KCP	NM_001135914;NM_199349	TSS200;TSS200	chr7:128550409-128550903	Island			NA	7:128550741-128551016	Unclassified_Cell_type_specific	KCP	NM_001135914
cg05214460	-0.0934633	-9.95615	9.10866e-07	0.002274	6.24264	10	111766841	F	ADD3;ADD3;ADD3	NM_019903;NM_016824;NM_001121	5'UTR;TSS1500;TSS1500	chr10:111767087-111768355	N_Shore			NA			ADD3	NM_001121
cg14389669	-0.188	-9.95294	9.13749e-07	0.002274	6.23962	9	136399386	R	ADAMTSL2;ADAMTSL2	NM_001145320;NM_014694	5'UTR;TSS1500	chr9:136399367-136400274	Island			TRUE			ADAMTSL2	NM_014694
cg26291519	-0.183807	-9.94943	9.1691e-07	0.002274	6.23633	15	76640005	R				chr15:76638472-76639823	S_Shore		RDMR	NA			ISL2	AB593133
cg01001533	-0.113829	-9.93473	9.30299e-07	0.00229348	6.22249	10	44184868	F				chr10:44185039-44186132	N_Shore			NA	10:44184675-44186241	Promoter_Associated_Cell_type_specific	ZNF32	NM_006973
cg02018681	-0.164554	-9.927	9.37415e-07	0.00229734	6.21521	8	61834943	R				chr8:61834699-61835871	Island		RDMR	NA			LOC100130298	NR_034003
cg22849665	-0.31028	-9.9131	9.50376e-07	0.00231541	6.2021	6	32118375	R	PRRT1	NM_030651	Body	chr6:32118101-32118544	Island			NA			PRRT1	AK123424
cg22957360	-0.139755	-9.88572	9.76467e-07	0.00235771	6.17622	10	101282572	R				chr10:101282725-101282934	N_Shore			NA			chromosome 10 open reading frame 139	DQ372721
cg14621323	-0.203002	-9.88296	9.79143e-07	0.00235771	6.17361	5	176827161	R	PFN3;PFN3	NM_001029886;NM_001029886	1stExon;3'UTR	chr5:176827081-176827754	Island			NA			PFN3	NM_001029886
cg06241901	-0.139016	-9.87349	9.88372e-07	0.00235771	6.16464	6	43244304	F	TTBK1	NM_032538	Body	chr6:43243593-43244305	Island			NA			TTBK1	BC036764
cg19873536	-0.218366	-9.86877	9.93016e-07	0.00235771	6.16016	10	116475283	R								TRUE			Mir_548	.
cg11200656	-0.191226	-9.8645	9.97229e-07	0.00235771	6.15611	17	75956447	F				chr17:75953890-75955952	S_Shore		RDMR	NA			U1	.
cg03871267	-0.160273	-9.8598	1.00189e-06	0.00235771	6.15165	5	67483475	R								NA			PIK3R1	NM_181523
cg23895076	-0.168803	-9.84216	1.0196e-06	0.00238582	6.1349	17	8578385	R								TRUE			MYH10	AB210026
cg23008871	-0.1927	-9.83598	1.02588e-06	0.00238703	6.12902	17	45949743	R				chr17:45949676-45949885	Island			NA			BC031827	BC031827
cg00205605	-0.0875423	-9.79645	1.06708e-06	0.00246902	6.09134	1	2516401	R				chr1:2517397-2518892	N_Shore			TRUE	1:2516313-2516563	Promoter_Associated_Cell_type_specific	FAM213B	NR_036637
cg23272544	-0.125144	-9.77835	1.08654e-06	0.00250009	6.07403	21	45705429	F	AIRE	NM_000383	TSS1500	chr21:45705428-45706044	Island			NA			AIRE	NM_000383
cg14086013	-0.178393	-9.76109	1.10546e-06	0.00252768	6.05749	6	41604740	F	MDFI	NM_005586	TSS1500	chr6:41604583-41606663	Island	high-CpG:41712530-41712918		NA	6:41604703-41605068	Unclassified_Cell_type_specific	MDFI	NM_005586
cg20636352	-0.201147	-9.75583	1.1113e-06	0.00252768	6.05245	2	200468832	R				chr2:200468551-200468958	Island			NA			BC035629	BC035629
cg16701167	-0.166924	-9.7496	1.11825e-06	0.00252768	6.04647	6	84141234	R	ME1	NM_002395	TSS1500	chr6:84140412-84140998	S_Shore			NA	6:84141175-84141408	Unclassified_Cell_type_specific	ME1	AK302777
cg25879142	-0.158681	-9.74542	1.12295e-06	0.00252768	6.04246	7	4671391	F								TRUE	7:4670879-4671628	Unclassified_Cell_type_specific	FOXK1	BC038434
cg16501323	-0.129081	-9.73247	1.13762e-06	0.00253774	6.03001	21	45705618	R	AIRE	NM_000383	TSS200	chr21:45705428-45706044	Island			NA			AIRE	NM_000383
cg26242687	-0.146022	-9.73068	1.13967e-06	0.00253774	6.02829	6	41471014	R				chr6:41472816-41473291	N_Shore			TRUE			DQ141194	DQ141194
cg16639692	-0.242673	-9.72088	1.15093e-06	0.00254911	6.01886	5	43037666	F				chr5:43037259-43037520	S_Shore		CDMR	NA	5:43036507-43037801	Promoter_Associated_Cell_type_specific	C5orf39	NM_001014279
cg01681525	-0.139362	-9.68937	1.18798e-06	0.00261716	5.98848	17	79374741	F	BAHCC1	NM_001080519	Body	chr17:79366806-79374742	Island		RDMR	NA			MIR4740	NR_039894
cg17220161	-0.185125	-9.6817	1.19719e-06	0.0026235	5.98107	1	203242601	R				chr1:203242519-203242818	Island			TRUE	1:203241935-203242840	Promoter_Associated	CHIT1	AK131093
cg15555017	-0.20764	-9.66929	1.21225e-06	0.00264253	5.96907	11	128455958	F	ETS1	NM_001143820	5'UTR					TRUE			ETS1	NM_001143820
cg03173827	-0.132047	-9.66396	1.21879e-06	0.00264287	5.9639	20	62688717	F	TCEA2;TCEA2	NM_198723;NM_198723	1stExon;5'UTR	chr20:62688551-62688878	Island			TRUE	20:62688571-62689673	Unclassified	TCEA2	NM_198723
cg10571901	-0.150213	-9.64991	1.23619e-06	0.00265451	5.95029	2	43295303	R				chr2:43295212-43295555	Island			TRUE			ZFP36L2	NM_006887
cg03274456	-0.223508	-9.64929	1.23698e-06	0.00265451	5.94968	11	62273116	F	AHNAK	NM_024060	Body					TRUE			AHNAK	NM_001620
cg17205324	-0.222577	-9.6172	1.27779e-06	0.00271314	5.91851	14	23835595	F	EFS;EFS	NM_032459;NM_005864	TSS1500;TSS1500	chr14:23834435-23835947	Island	high-CpG:22904163-22905667		NA			EFS	NM_032459
cg23689428	-0.148043	-9.61219	1.28428e-06	0.00271314	5.91364	2	121223964	R	LOC84931	NR_027181	TSS200					TRUE			LOC84931	NR_027181
cg03222009	-0.169417	-9.60976	1.28745e-06	0.00271314	5.91127	2	129077232	R	HS6ST1	NM_004807	TSS1500	chr2:129075197-129077639	Island			NA			HS6ST1	NM_004807
cg07653800	-0.0946767	-9.60742	1.2905e-06	0.00271314	5.909	12	108678246	F								TRUE			CMKLR1	CCDS41829
cg08106887	-0.154535	-9.57775	1.32996e-06	0.00277934	5.88005	12	54412565	F	HOXC4;HOXC5;HOXC6	NM_014620;NR_003084;NM_153693	5'UTR;Body;5'UTR	chr12:54412990-54413346	N_Shore			NA	12:54411351-54412742	Unclassified	HOXC5	NR_003084
cg26175789	-0.20394	-9.57073	1.33949e-06	0.00277934	5.87318	2	75821892	R								TRUE			FAM176A	NM_032181
cg01877084	-0.110051	-9.56879	1.34212e-06	0.00277934	5.87129	1	160341106	F	NHLH1	NM_005598	3'UTR	chr1:160340604-160340843	S_Shore			NA			NHLH1	CCDS1204
cg07249684	-0.162341	-9.56058	1.35338e-06	0.00278873	5.86326	8	689392	R				chr8:686830-689496	Island			NA	8:689126-689430	Unclassified_Cell_type_specific	BC022082	BC022082
cg18280057	-0.225003	-9.54941	1.36887e-06	0.00280666	5.85232	8	125741158	F	MTSS1	NM_014751	TSS1500	chr8:125739685-125741266	Island			NA			MTSS1	AK027015
cg09692695	-0.183116	-9.53129	1.39438e-06	0.00284489	5.83455	2	74668286	F	RTKN;RTKN;RTKN	NM_001015055;NM_033046;NM_001015056	Body;TSS1500;TSS1500	chr2:74667593-74669403	Island		RDMR	NA	2:74667057-74668479	Unclassified	RTKN	NM_001015056
cg12559119	-0.165763	-9.48047	1.46875e-06	0.00298193	5.78452	17	63590575	R								TRUE	17:63590429-63590633	Unclassified_Cell_type_specific	AXIN2	NM_004655
cg27098804	-0.21509	-9.46735	1.48863e-06	0.00300236	5.77157	11	60776124	R	CD6	NM_006725	Body	chr11:60775036-60776307	Island			NA			TRNA_Pseudo	.
cg12937580	-0.0863877	-9.46103	1.49832e-06	0.00300236	5.76532	14	91862907	R	CCDC88C	NM_001080414	Body					NA			CCDC88C	AK302839
cg21631918	-0.160253	-9.459	1.50144e-06	0.00300236	5.76331	15	74501549	R	STRA6;STRA6;STRA6	NM_001142617;NM_001142619;NM_001142620	TSS200;TSS200;TSS200					TRUE			STRA6	NM_001142617
cg10663765	-0.294664	-9.45488	1.50781e-06	0.00300236	5.75923	3	194014592	F				chr3:194014480-194014983	Island			NA			LOC100131551	NR_024480
cg03755115	-0.150173	-9.42129	1.5608e-06	0.00308929	5.72594	11	76858729	R	MYO7A;MYO7A;MYO7A	NM_000260;NM_001127180;NM_001127179	Body;Body;Body	chr11:76858728-76859181	Island			NA			MYO7A	NM_001127179
cg27140633	-0.129172	-9.41569	1.56984e-06	0.00308929	5.72037	11	63685905	F				chr11:63685489-63685968	Island			TRUE			RCOR2	NM_173587
cg14883961	-0.147327	-9.4109	1.5776e-06	0.00308929	5.71561	8	127846077	R								TRUE			PCAT1	NR_045262
cg15128226	-0.165298	-9.40715	1.58371e-06	0.00308929	5.71188	4	123747672	R	FGF2	NM_002006	TSS200	chr4:123747740-123748980	N_Shore			NA			FGF2	NM_002006
cg10408284	-0.16294	-9.40406	1.58876e-06	0.00308929	5.70881	17	48912327	R	WFIKKN2	NM_175575	TSS1500					TRUE			WFIKKN2	NM_175575
cg08498747	-0.23539	-9.39773	1.59917e-06	0.00309501	5.70251	17	41747669	R								TRUE	17:41747654-41747747	Unclassified_Cell_type_specific	MEOX1	NM_001040002
cg09501959	-0.0759716	-9.38644	1.61792e-06	0.00310175	5.69126	2	193058203	F	TMEFF2	NM_016192	Body	chr2:193058995-193060812	N_Shore		RDMR	NA			TMEFF2	DQ133599
cg15772157	-0.186629	-9.38256	1.62441e-06	0.00310175	5.6874	10	22766320	R				chr10:22764708-22767050	Island			NA			LOC100499489	NR_036533
cg02996583	-0.21764	-9.36841	1.64835e-06	0.00310175	5.67328	8	142237188	R	SLC45A4	NM_001080431	Body	chr8:142237037-142237360	Island			NA	8:142237180-142237486	Unclassified_Cell_type_specific	SLC45A4	NM_001080431
cg04869006	-0.132639	-9.35851	1.66532e-06	0.00310175	5.66339	10	99178421	F								TRUE	10:99178358-99178478	Unclassified_Cell_type_specific	LOC644215	BC009463
cg08781728	-0.145888	-9.35814	1.66596e-06	0.00310175	5.66302	8	21882587	F	NPM2	NM_182795	5'UTR	chr8:21882245-21882883	Island			TRUE			NPM2	NM_182795
cg26410133	-0.10947	-9.3566	1.66863e-06	0.00310175	5.66148	1	115051834	R	TRIM33;TRIM33	NM_033020;NM_015906	Body;Body	chr1:115053060-115054264	N_Shore			NA			TRIM33	NM_033020
cg05050592	-0.238142	-9.35382	1.67344e-06	0.00310175	5.6587	10	44069309	R	ZNF239;ZNF239;ZNF239	NM_001099284;NM_001099282;NM_001099283	5'UTR;5'UTR;5'UTR	chr10:44069359-44070179	N_Shore		RDMR	TRUE	10:44069111-44070531	NonGene_Associated	ZNF239	NM_001099283
cg23373640	-0.258027	-9.3451	1.68862e-06	0.00310175	5.64998	14	65696480	R								TRUE	14:65696287-65696828	Unclassified	BX161428	BX161428
cg07604700	-0.101407	-9.343	1.6923e-06	0.00310175	5.64788	17	16395991	F	C17orf76;C17orf76	NM_207387;NM_001113567	TSS1500;TSS1500	chr17:16394833-16395843	S_Shore			NA	17:16394389-16396172	Unclassified_Cell_type_specific	FAM211A	NM_207387
cg13518442	-0.0938277	-9.34283	1.6926e-06	0.00310175	5.6477	15	58358879	R	ALDH1A2;ALDH1A2	NM_003888;NM_170696	TSS1500;TSS1500	chr15:58357309-58358776	S_Shore			NA	15:58357985-58359713	Unclassified	ALDH1A2	NM_003888
cg11709405	-0.159605	-9.32863	1.71772e-06	0.00310175	5.63348	1	24649398	R	GRHL3;GRHL3;GRHL3	NM_198174;NM_198173;NM_021180	TSS200;Body;TSS200	chr1:24648202-24648985	S_Shore			NA	1:24647785-24649616	Unclassified	GRHL3	AY231161
cg00056066	-0.331193	-9.32448	1.72512e-06	0.00310175	5.62932	10	25010738	F	ARHGAP21	NM_020824	Body	chr10:25011963-25013816	N_Shore		DMR	NA			ARHGAP21	AK074589
cg08537783	-0.12023	-9.3234	1.72707e-06	0.00310175	5.62823	1	10795394	F	CASZ1;CASZ1	NM_001079843;NM_017766	5'UTR;5'UTR					NA			CASZ1	AK293839
cg26257411	-0.0794833	-9.32286	1.72804e-06	0.00310175	5.62769	6	33397122	F	SYNGAP1	NM_006772	Body	chr6:33396050-33396296	S_Shore			NA	6:33397014-33397949	Promoter_Associated	SYNGAP1	AL713634
cg00424169	-0.14085	-9.31877	1.73539e-06	0.00310175	5.62359	13	31506837	F	C13orf26;C13orf26	NM_152325;NM_152325	1stExon;5'UTR					NA			C13orf26	NM_152325
cg05797770	-0.105658	-9.31654	1.73942e-06	0.00310175	5.62135	1	16470667	F	EPHA2	NM_004431	Body					NA	1:16470559-16470891	Unclassified_Cell_type_specific	EPHA2	EU826606
cg08840551	-0.10421	-9.29848	1.77239e-06	0.00310175	5.6032	5	56718349	F								NA			ACTBL2	NM_001017992
cg24601559	-0.261184	-9.29631	1.7764e-06	0.00310175	5.60102	2	43328536	F				chr2:43327936-43328337	S_Shore		DMR	NA	2:43328510-43328670	Unclassified_Cell_type_specific	ZFP36L2	NM_006887
cg01471372	-0.140419	-9.28845	1.79098e-06	0.00310175	5.59311	8	38592365	R	TACC1	NM_001146216	5'UTR					TRUE	8:38591621-38592560	Unclassified_Cell_type_specific	TACC1	AK303596
cg24522254	-0.161837	-9.2853	1.79687e-06	0.00310175	5.58994	2	174878113	F				chr2:174877565-174877778	S_Shore			TRUE			SP3	NM_003111
cg21363811	-0.169729	-9.28372	1.79984e-06	0.00310175	5.58835	1	179713950	F	FAM163A	NM_173509	5'UTR	chr1:179711947-179713951	Island			NA			FAM163A	NM_173509
cg24603028	-0.126538	-9.27469	1.81686e-06	0.00310175	5.57925	12	53497306	R	SOAT2;SOAT2	NM_003578;NM_003578	1stExon;5'UTR					NA	12:53496632-53498065	Unclassified	SOAT2	NM_003578
cg21248554	-0.20191	-9.27276	1.82052e-06	0.00310175	5.5773	2	27665150	R	KRTCAP3;KRTCAP3	NM_001168364;NM_173853	TSS200;TSS200	chr2:27664939-27665151	Island			NA	2:27664962-27665570	Promoter_Associated	KRTCAP3	NM_001168364
cg16014606	-0.139517	-9.27078	1.82429e-06	0.00310175	5.5753	11	10715221	F	MRVI1;MRVI1;MRVI1;MRVI1;MRVI1	NM_001100163;NM_001100163;NM_130385;NM_130385;NM_001100167	1stExon;5'UTR;1stExon;5'UTR;TSS200			low-CpG:10671608-10672092		TRUE			MRVI1	NM_001100167
cg16820615	-0.212343	-9.26993	1.82591e-06	0.00310175	5.57444	13	114884918	F	RASA3	NM_007368	Body					NA			RASA3	AK295861
cg05254747	-0.187389	-9.26838	1.82886e-06	0.00310175	5.57288	8	22223937	R	SLC39A14;SLC39A14;SLC39A14;SLC39A14	NM_001135154;NM_015359;NM_001128431;NM_001135153	TSS1500;TSS1500;TSS1500;TSS1500	chr8:22224519-22225244	N_Shore		RDMR	NA	8:22223934-22225986	Promoter_Associated	SLC39A14	NM_001135154
cg14230238	-0.130754	-9.26521	1.83491e-06	0.00310175	5.56969	19	6066871	R	RFX2;RFX2	NM_000635;NM_134433	5'UTR;5'UTR				RDMR	NA			RFX2	AK303321
cg17780731	-0.124062	-9.26379	1.83763e-06	0.00310175	5.56825	5	67483678	F								NA			PIK3R1	NM_181523
cg20505728	-0.119658	-9.26209	1.84089e-06	0.00310175	5.56654	3	43800538	R								TRUE			ABHD5	NM_016006
cg13422817	-0.123399	-9.25811	1.84857e-06	0.00310175	5.56251	12	4550927	F	FGF6	NM_020996	Body	chr12:4554405-4554624	N_Shelf			NA			FGF6	NM_020996
cg00003625	-0.162043	-9.25508	1.85443e-06	0.00310175	5.55945	17	48912543	R	WFIKKN2	NM_175575	TSS200					TRUE			WFIKKN2	NM_175575
cg15895197	-0.127415	-9.25323	1.85802e-06	0.00310175	5.55758	2	27301490	F	EMILIN1;EMILIN1	NM_007046;NM_007046	1stExon;5'UTR	chr2:27305312-27305612	N_Shelf			TRUE			EMILIN1	NM_007046
cg14623715	-0.162163	-9.24912	1.866e-06	0.00310175	5.55343	6	136174534	F	PDE7B	NM_018945	Body					TRUE			PDE7B	NM_018945
cg03510528	-0.163482	-9.24909	1.86607e-06	0.00310175	5.5534	10	131132657	F								NA			MGMT	NM_002412
cg26173906	-0.205945	-9.24773	1.86872e-06	0.00310175	5.55202	19	14376389	F				chr19:14376688-14376961	N_Shore			TRUE			LPHN1	NM_001008701
cg24330456	-0.11406	-9.24592	1.87226e-06	0.00310175	5.55019	6	30038955	R	RNF39;RNF39	NM_170769;NM_025236	Body;Body	chr6:30038881-30039477	Island			NA			PPP1R11	AK310593
cg27102629	-0.226762	-9.2091	1.94584e-06	0.00320521	5.51289	10	76573155	R				chr10:76573195-76573507	N_Shore			NA			KAT6B	NM_012330
cg00259472	-0.0884884	-9.20113	1.96219e-06	0.00320521	5.50479	5	159625590	R	FABP6;FABP6	NM_001130958;NM_001040442	5'UTR;TSS1500					TRUE	5:159625080-159627040	Unclassified	FABP6	NM_001040442
cg03840467	-0.0790898	-9.19827	1.96808e-06	0.00320521	5.50188	17	75278162	F	2017-09-09	NM_001113491	Body	chr17:75277317-75278172	Island			NA			41161	NM_001113491
cg23522915	-0.0937923	-9.19576	1.97327e-06	0.00320521	5.49933	12	48199277	R	HDAC7;HDAC7	NM_015401;NM_001098416	Body;Body					TRUE	12:48199228-48200649	Promoter_Associated_Cell_type_specific	HDAC7	AF239243
cg09473282	-0.0728807	-9.1957	1.97341e-06	0.00320521	5.49927	6	35115955	F								TRUE			TCP11	AK302022
cg09265392	-0.114795	-9.18821	1.98897e-06	0.00321788	5.49166	16	49910216	R				chr16:49910209-49910863	Island			TRUE			ZNF423	NM_015069
cg15302379	-0.205467	-9.17195	2.02327e-06	0.00326063	5.4751	10	102821848	F	KAZALD1;KAZALD1	NM_030929;NM_030929	1stExon;5'UTR	chr10:102820488-102822874	Island		CDMR	TRUE			KAZALD1	AY014271
cg19010490	-0.18601	-9.15228	2.06561e-06	0.00331091	5.45503	15	37388127	R	MEIS2;MEIS2;MEIS2;MEIS2;MEIS2;MEIS2;MEIS2	NM_172316;NM_170674;NM_170675;NM_172315;NM_002399;NM_170677;NM_170676	Body;Body;Body;Body;Body;Body;Body	chr15:37387386-37387614	S_Shore		RDMR	NA			MEIS2	AK300247
cg06026545	-0.197219	-9.15006	2.07046e-06	0.00331091	5.45276	17	35656860	R	ACACA;ACACA;ACACA;ACACA;ACACA	NM_198839;NM_198837;NM_198838;NM_198834;NM_198836	Body;TSS200;TSS200;Body;Body					TRUE			ACACA	NM_198838
cg03416628	-0.0932188	-9.14346	2.08491e-06	0.00331257	5.44602	12	54446505	F	HOXC4;HOXC4	NM_014620;NM_153633	5'UTR;TSS1500	chr12:54447744-54448091	N_Shore		RDMR	TRUE	12:54446153-54447426	Unclassified	HOXC4	NM_153633
cg22842797	-0.167429	-9.14229	2.08749e-06	0.00331257	5.44482	17	48912621	R	WFIKKN2;WFIKKN2	NM_175575;NM_175575	1stExon;5'UTR					TRUE			WFIKKN2	NM_175575
cg12131208	-0.216086	-9.12485	2.12626e-06	0.00336121	5.42698	17	58499700	F	C17orf64	NM_181707	TSS200	chr17:58498711-58499332	S_Shore			TRUE			C17orf64	NM_181707
cg26817145	-0.138208	-9.1189	2.13967e-06	0.00336512	5.42088	15	71807797	F	THSD4	NM_024817	Body					TRUE			THSD4	BX648716
cg06925984	-0.170127	-9.11655	2.14499e-06	0.00336512	5.41848	17	77767242	F				chr17:77763364-77767356	Island			NA			CBX8	NM_020649
cg12233232	-0.0979535	-9.10366	2.17445e-06	0.00339847	5.40525	11	43379844	R	TTC17	NM_018259	TSS1500	chr11:43380241-43381040	N_Shore			NA	11:43379705-43381525	Promoter_Associated	TTC17	NM_018259
cg08060857	-0.0852146	-9.09265	2.19993e-06	0.00342538	5.39395	16	85202526	R				chr16:85202390-85202631	Island			NA	16:85202372-85203910	Unclassified	LOC400548	NR_033984
cg08731696	-0.274521	-9.08552	2.21662e-06	0.00343844	5.38661	1	59280489	F				chr1:59280240-59280490	Island			TRUE			LOC100131060	NR_034014
cg19506623	-0.093545	-9.0701	2.25317e-06	0.00348209	5.37074	2	161265259	F	RBMS1;RBMS1	NM_002897;NM_016836	Body;Body	chr2:161263871-161264460	S_Shore			NA			MIR4785	NR_039946
cg19824242	-0.230575	-9.06281	2.27068e-06	0.0034961	5.36323	2	105273432	F				chr2:105275588-105275940	N_Shelf			NA			LOC284998	AX746619
cg05837435	-0.153594	-9.05852	2.28104e-06	0.00349645	5.35881	10	118609965	R				chr10:118608599-118609377	S_Shore			NA			HSPA12A	BC041412
cg10799440	-0.186559	-9.05574	2.28779e-06	0.00349645	5.35594	8	120685686	F								TRUE			ENPP2	NM_001130863
cg16116203	-0.0980259	-9.04527	2.31341e-06	0.00350414	5.34513	12	6876922	F	PTMS	NM_002824	Body	chr12:6875481-6876923	Island			NA	12:6875298-6877260	Promoter_Associated	MLF2	AK313998
cg17362900	-0.124003	-9.04036	2.32552e-06	0.00350414	5.34006	6	33047944	R	HLA-DPB1	NM_002121	Body	chr6:33048416-33048814	N_Shore			NA			HLA-DPB1	L29173
cg07571337	-0.112087	-9.03823	2.3308e-06	0.00350414	5.33786	10	93805844	F				chr10:93805512-93805845	Island			TRUE			SNORA25	.
cg14134256	-0.111888	-9.03191	2.34653e-06	0.00350414	5.33133	11	94502879	F	AMOTL1	NM_130847	Body	chr11:94501366-94502696	S_Shore			NA			AMOTL1	NM_130847
cg02630477	-0.163358	-9.02161	2.3724e-06	0.00350414	5.32067	1	40388223	R								NA			MYCL1	NM_001033081
cg11923631	-0.139027	-9.02069	2.37474e-06	0.00350414	5.31972	21	45705721	R	AIRE	NM_000383	TSS200	chr21:45705428-45706044	Island			NA			AIRE	NM_000383
cg03162823	-0.193408	-9.01954	2.37766e-06	0.00350414	5.31853	12	95941571	R	USP44;USP44	NM_001042403;NM_032147	5'UTR;5'UTR	chr12:95941906-95942979	N_Shore		CDMR	NA	12:95941391-95943244	Promoter_Associated_Cell_type_specific	USP44	AK315697
cg11354105	-0.128354	-9.01935	2.37813e-06	0.00350414	5.31833	2	25475805	R	DNMT3A;DNMT3A;DNMT3A	NM_022552;NM_153759;NM_175629	Body;TSS1500;Body	chr2:25475706-25475928	Island			NA			DNMT3A	NM_153759
cg05766948	-0.155558	-9.01712	2.38381e-06	0.00350414	5.31602	2	136783356	R								TRUE			DARS	CR749809
cg16717549	-0.141019	-9.0165	2.38538e-06	0.00350414	5.31538	21	45705699	R	AIRE	NM_000383	TSS200	chr21:45705428-45706044	Island			NA			AIRE	NM_000383
cg23907108	-0.174948	-9.0163	2.38588e-06	0.00350414	5.31517	11	64405993	F	NRXN2;NRXN2;NRXN2	NM_138734;NM_138732;NM_015080	Body;Body;Body	chr11:64405451-64406006	Island			NA			NRXN2	NM_138734
cg14776998	-0.257585	-8.99732	2.43471e-06	0.00355504	5.29549	3	32863439	R	TRIM71	NM_001039111	Body	chr3:32863174-32863415	S_Shore			NA			TRIM71	NM_001039111
cg16837557	-0.138216	-8.99616	2.43771e-06	0.00355504	5.29429	11	126322576	R	KIRREL3;KIRREL3	NM_001161707;NM_032531	Body;Body					TRUE			ST3GAL4	AF516602
cg24861859	-0.13396	-8.98949	2.45515e-06	0.00355883	5.28736	1	175474533	R	TNR	NM_003285	5'UTR					NA			BC043291	BC043291
cg21581504	-0.17035	-8.9886	2.45749e-06	0.00355883	5.28644	2	68545960	F	CNRIP1;CNRIP1	NM_015463;NM_001111101	Body;Body	chr2:68546339-68547111	N_Shore			NA			CNRIP1	AK308979
cg13987674	-0.143677	-8.97007	2.50671e-06	0.00361745	5.26716	1	24649494	F	GRHL3;GRHL3;GRHL3	NM_198174;NM_198173;NM_021180	TSS200;Body;TSS200	chr1:24648202-24648985	S_Shore			NA	1:24647785-24649616	Unclassified	GRHL3	AY231161
cg05593411	-0.0958832	-8.96445	2.52184e-06	0.00362335	5.26131	5	58883430	F	PDE4D;PDE4D;PDE4D	NM_001165899;NM_006203;NM_001104631	Body;TSS1500;Body			low-CpG:58919135-58919242		TRUE			PDE4D	NM_006203
cg25457886	-0.204857	-8.96206	2.52829e-06	0.00362335	5.25882	3	14339565	R				chr3:14339249-14339574	Island			TRUE			AX747368	AX747368
cg23733845	-0.181331	-8.9577	2.54012e-06	0.00362775	5.25428	7	101936527	R	SH2B2	NM_020979	Body	chr7:101936317-101936548	Island			NA			MIR4285	NR_036245
cg17470251	-0.210886	-8.95336	2.55197e-06	0.00363215	5.24976	8	19459996	F	CSGALNACT1;CSGALNACT1;CSGALNACT1;CSGALNACT1	NM_001130518;NM_001130518;NR_024040;NM_018371	1stExon;5'UTR;Body;5'UTR	chr8:19459905-19460137	Island			NA			CSGALNACT1	AK055154
cg02247178	-0.222668	-8.94824	2.56602e-06	0.00363964	5.24442	13	31506687	F	C13orf26	NM_152325	TSS200					NA			LOC100507064	NR_038288
cg08077071	-0.122524	-8.94059	2.58718e-06	0.00365713	5.23643	2	157176106	F				chr2:157176251-157177346	N_Shore			NA			NR4A2	FJ643485
cg09510531	-0.117505	-8.92948	2.61823e-06	0.00368843	5.22482	21	45705742	R	AIRE	NM_000383	TSS200	chr21:45705428-45706044	Island			NA			AIRE	NM_000383
cg18454133	-0.117764	-8.92014	2.64464e-06	0.003713	5.21506	14	23835870	F	EFS;EFS	NM_032459;NM_005864	TSS1500;TSS1500	chr14:23834435-23835947	Island			NA			EFS	NM_032459
cg11580525	-0.110938	-8.91402	2.66211e-06	0.00372491	5.20865	11	118022923	R	SCN4B;SCN4B	NM_001142348;NM_174934	Body;Body	chr11:118023352-118024194	N_Shore		CDMR	NA			SCN4B	NM_001142348
cg20701556	-0.192579	-8.90744	2.68103e-06	0.00373874	5.20176	1	95698924	F	RWDD3;RWDD3	NM_001128142;NM_015485	TSS1500;TSS1500	chr1:95699725-95700142	N_Shore			NA	1:95698735-95700504	Promoter_Associated	AK090700	AK090700
cg21048168	-0.142463	-8.89381	2.72069e-06	0.0037694	5.18746	7	138458827	R	ATP6V0A4;ATP6V0A4;ATP6V0A4	NM_130840;NM_020632;NM_130841	5'UTR;5'UTR;TSS200					NA			ATP6V0A4	NM_130841
cg16820616	-0.103798	-8.89363	2.72121e-06	0.0037694	5.18728	11	30605581	F	MPPED2	NM_001145399	5'UTR	chr11:30605558-30605800	Island			NA			MPPED2	AK309809
cg03962527	-0.258399	-8.88732	2.73979e-06	0.00377495	5.18065	10	111766879	R	ADD3;ADD3;ADD3	NM_019903;NM_016824;NM_001121	5'UTR;TSS1500;TSS1500	chr10:111767087-111768355	N_Shore			NA			ADD3	NM_001121
cg05940146	-0.100648	-8.88608	2.74345e-06	0.00377495	5.17935	14	76097639	R	FLVCR2	NM_017791	Body					TRUE			FLVCR2	NM_001195283
cg08246800	-0.0831417	-8.88033	2.76052e-06	0.00378523	5.17331	11	73356353	R	PLEKHB1;PLEKHB1	NM_021200;NM_001130033	TSS1500;TSS1500				RDMR	NA			PLEKHB1	NM_001130033
cg04968127	-0.158235	-8.87742	2.7692e-06	0.00378523	5.17025	11	10715213	R	MRVI1;MRVI1;MRVI1;MRVI1;MRVI1	NM_001100163;NM_001100163;NM_130385;NM_130385;NM_001100167	1stExon;5'UTR;1stExon;5'UTR;TSS200			low-CpG:10671608-10672092		TRUE			MRVI1	NM_001100167
cg10313047	-0.190772	-8.86568	2.80454e-06	0.00381122	5.1579	3	52351355	R	DNAH1	NM_015512	5'UTR					NA	3:52351326-52352105	Unclassified_Cell_type_specific	DNAH1	AK125990
cg27268279	-0.157241	-8.86499	2.80662e-06	0.00381122	5.15718	10	71672083	F	COL13A1;COL13A1;COL13A1;COL13A1;COL13A1;COL13A1;COL13A1;COL13A1;COL13A1;COL13A1;COL13A1;COL13A1;COL13A1;COL13A1;COL13A1;COL13A1;COL13A1;COL13A1;COL13A1;COL13A1	NM_080798;NM_080809;NM_080800;NM_080811;NM_080810;NM_080799;NM_080813;NM_005203;NM_080815;NM_080807;NM_080801;NM_080808;NM_080814;NM_080802;NM_080812;NM_080805;NM_080806;NM_080804;NM_080803;NM_001130103	Body;Body;Body;Body;Body;Body;Body;Body;Body;Body;Body;Body;Body;Body;Body;Body;Body;Body;Body;Body					TRUE			COL13A1	NM_080800
cg17551891	-0.108195	-8.85998	2.82187e-06	0.00381449	5.1519	7	1960795	R	MAD1L1;MAD1L1;MAD1L1	NM_003550;NM_001013837;NM_001013836	Body;Body;Body					NA			MAD1L1	BC018870
cg11256956	-0.0863779	-8.85582	2.83461e-06	0.00381449	5.14752	12	3446067	R								NA			BC047090	BC047090
cg16246545	-0.13026	-8.85515	2.83666e-06	0.00381449	5.14681	1	120255941	R	PHGDH	NM_006623	Body	chr1:120254844-120255499	S_Shore		RDMR	NA			PHGDH	NM_006623
cg19805668	-0.119258	-8.83197	2.90871e-06	0.00388568	5.12237	14	75418675	R	PGF	NM_002632	Body	chr14:75422068-75422507	N_Shelf			TRUE			PGF	AK310886
cg04140525	-0.104282	-8.83084	2.91229e-06	0.00388568	5.12117	1	153467760	F								TRUE	1:153466509-153468400	Unclassified	S100A7	NM_002963
cg26465389	-0.141029	-8.82912	2.91774e-06	0.00388568	5.11935	10	135060475	F								NA			MIR202	NR_030170
cg11669516	-0.1653	-8.822	2.94034e-06	0.00390322	5.11183	2	217501092	R	IGFBP2	NM_000597	Body	chr2:217497811-217498847	S_Shelf		RDMR	NA			IGFBP2	AB209509
cg00116430	-0.174687	-8.81663	2.95752e-06	0.00391349	5.10615	1	94188268	F								TRUE			BCAR3	NM_003567
cg12242450	-0.174754	-8.81299	2.96923e-06	0.00391356	5.1023	6	10555808	R	GCNT2;GCNT2	NM_001491;NM_145649	TSS200;Body					TRUE			GCNT2	NM_001491
cg02705163	-0.132646	-8.81075	2.97647e-06	0.00391356	5.09992	6	138893673	R	NHSL1	NM_020464	TSS200			low-CpG:138934848-138935443		NA			NHSL1	NM_020464
cg17740093	0.0563819	8.79367	3.0322e-06	0.00396778	5.08183	1	22916803	F	EPHA8	NM_020526	Body	chr1:22919773-22920207	N_Shelf			NA			EPHA8	NM_001006943
cg06137072	-0.132205	-8.79226	3.03687e-06	0.00396778	5.08033	3	141087187	F	ZBTB38	NM_001080412	5'UTR			low-CpG:142569812-142570106		TRUE			ZBTB38	AK307452
cg19873297	-0.139488	-8.78353	3.06583e-06	0.00399302	5.07108	5	171616388	F	STK10	NM_005990	TSS1500	chr5:171614430-171615939	S_Shore		RDMR	NA	5:171615117-171616622	Promoter_Associated	STK10	NM_005990
cg26160218	-0.202591	-8.76547	3.12675e-06	0.00405866	5.05188	3	24538388	R				chr3:24535844-24537436	S_Shore			NA	3:24537807-24538456	Unclassified_Cell_type_specific	THRB	AY286470
cg03538499	-0.18889	-8.76125	3.14117e-06	0.00405866	5.04739	1	27941694	F	FGR;FGR;FGR	NM_001042729;NM_001042747;NM_005248	Body;Body;Body	chr1:27941865-27942324	N_Shore			NA			FGR	AK125143
cg25646708	-0.229867	-8.75995	3.14562e-06	0.00405866	5.04601	3	134031685	R				chr3:134031662-134032591	Island			NA			AMOTL2	AK091040
cg13341668	-0.185087	-8.75608	3.15894e-06	0.00406318	5.04189	3	50359909	F	HYAL2;HYAL2	NM_003773;NM_033158	5'UTR;TSS1500	chr3:50359839-50360042	Island			NA	3:50358176-50360136	Promoter_Associated	HYAL2	AK127945
cg00113225	-0.151038	-8.74536	3.19612e-06	0.00407505	5.03047	10	64266524	R	ZNF365	NM_199451	Body					TRUE			ZNF365	NM_199452
cg22400703	-0.230091	-8.74447	3.1992e-06	0.00407505	5.02953	2	68545995	F	CNRIP1;CNRIP1	NM_015463;NM_001111101	Body;Body	chr2:68546339-68547111	N_Shore			NA			CNRIP1	AK308979
cg11620716	-0.11004	-8.74146	3.20976e-06	0.00407505	5.02631	5	171057078	R				chr5:171057071-171057340	Island			TRUE	5:171056486-171058001	Unclassified_Cell_type_specific	FGF18	NM_003862
cg20722590	-0.132457	-8.73946	3.21677e-06	0.00407505	5.02418	16	58061473	R	MMP15	NM_002428	Body	chr16:58059380-58061477	Island			NA			MMP15	NM_002428
cg07567308	-0.137827	-8.73929	3.21737e-06	0.00407505	5.024	20	3149320	F	ProSAPiP1	NM_014731	TSS200	chr20:3148649-3149060	S_Shore			TRUE			ProSAPiP1	NM_014731
cg23191801	-0.113303	-8.72483	3.26864e-06	0.00412146	5.00856	10	118609728	R				chr10:118608599-118609377	S_Shore			NA			HSPA12A	BC041412
cg18209323	-0.170893	-8.72336	3.27391e-06	0.00412146	5.00699	7	92672878	F				chr7:92672789-92673016	Island			NA			SAMD9	CCDS34680
cg00996847	-0.133894	-8.72053	3.28406e-06	0.00412171	5.00397	1	59902528	F	FGGY;FGGY	NM_018291;NM_001113411	Body;Body					TRUE			FGGY	BC000610
cg15172734	-0.211835	-8.71101	3.31847e-06	0.00415232	4.99379	3	57743377	F	SLMAP;SLMAP	NM_007159;NM_007159	5'UTR;1stExon	chr3:57741925-57742990	S_Shore			NA			SLMAP	NM_007159
cg13754720	-0.194254	-8.70203	3.35128e-06	0.00418074	4.98418	9	98274853	R	PTCH1;PTCH1	NM_001083602;NM_001083603	Body;Body	chr9:98272643-98273383	S_Shore		RDMR	NA			PTCH1	NM_000264
cg02956248	-0.221207	-8.69779	3.36689e-06	0.0041876	4.97964	6	32120901	R	PPT2;PRRT1;PPT2	NM_005155;NM_030651;NM_138717	TSS1500;TSS1500;TSS1500	chr6:32121829-32122529	N_Shore			TRUE	6:32120376-32123743	Promoter_Associated	PRRT1	BC013201
cg05310240	-0.18355	-8.68779	3.40402e-06	0.0042211	4.96893	17	47979069	F				chr17:47979465-47979740	N_Shore			NA	17:47978774-47979640	Unclassified_Cell_type_specific	TAC4	BC100843
cg07421287	-0.102316	-8.67924	3.43614e-06	0.00424822	4.95975	1	111218287	F	KCNA3	NM_002232	TSS1500	chr1:111216244-111217937	S_Shore			NA			KCNA3	NM_002232
cg22866426	-0.236276	-8.6758	3.44916e-06	0.00425162	4.95605	21	36263347	R	RUNX1	NM_001754	Body	chr21:36260450-36263687	Island			NA	21:36263308-36263857	Promoter_Associated	RUNX1	NM_001001890
cg17461600	-0.153858	-8.65792	3.51762e-06	0.00432314	4.93685	1	57983368	R	DAB1	NM_021080	5'UTR					TRUE			DAB1	AK313144
cg09674170	-0.261922	-8.65286	3.53726e-06	0.00433442	4.9314	16	3062382	R	CLDN9	NM_020982	TSS200	chr16:3063679-3063981	N_Shore			NA			CLDN9	NM_020982
cg16029875	-0.187168	-8.63878	3.59258e-06	0.00438572	4.91623	1	204320179	F	PLEKHA6	NM_014935	5'UTR					TRUE			PLEKHA6	NM_014935
cg13655803	-0.155849	-8.63683	3.60031e-06	0.00438572	4.91413	17	48912764	F	WFIKKN2;WFIKKN2	NM_175575;NM_175575	1stExon;5'UTR					NA			WFIKKN2	NM_175575
cg16912563	-0.246562	-8.62514	3.64702e-06	0.004425	4.90152	10	77157423	R				chr10:77155128-77169600	Island			TRUE			ZNF503-AS2	NR_024421
cg19795793	-0.223668	-8.62084	3.66439e-06	0.004425	4.89688	2	206551844	R	NRP2;NRP2;NRP2;NRP2;NRP2;NRP2	NM_201279;NM_018534;NM_201264;NM_201267;NM_003872;NM_201266	Body;Body;Body;Body;Body;Body	chr2:206549599-206551316	S_Shore		RDMR	NA			NRP2	AK290934
cg12364943	-0.0933778	-8.62052	3.66567e-06	0.004425	4.89653	10	134108614	F	STK32C	NM_173575	Body					NA			STK32C	BC045760
cg17166288	-0.115382	-8.61815	3.67529e-06	0.004425	4.89397	11	67979344	F	SUV420H1;SUV420H1	NM_017635;NM_016028	5'UTR;5'UTR	chr11:67980011-67982068	N_Shore			NA	11:67978656-67980724	Promoter_Associated	SUV420H1	NM_016028
cg01226614	-0.159087	-8.61178	3.70125e-06	0.00443337	4.88708	13	44947593	R	SERP2	NM_001010897	TSS1500	chr13:44947371-44948443	Island			TRUE			SERP2	NM_001010897
cg21304158	-0.0955125	-8.60891	3.71302e-06	0.00443337	4.88398	2	241937034	R	SNED1	NM_001080437	TSS1500	chr2:241937716-241938468	N_Shore			TRUE			SNED1	NM_001080437
cg13523576	-0.134414	-8.60858	3.71435e-06	0.00443337	4.88363	8	21909636	F	EPB49	NM_001114137	TSS1500	chr8:21905461-21905757	S_Shelf		CDMR	TRUE			EPB49	NM_001114137
cg20441135	-0.180695	-8.59865	3.75537e-06	0.00444251	4.87288	10	93999132	R	CPEB3	NM_014912	Body	chr10:93999131-94000015	Island			NA			CPEB3	AK127060
cg10163955	-0.152961	-8.5947	3.77181e-06	0.00444251	4.86861	10	8101402	F	GATA3;GATA3	NM_001002295;NM_002051	Body;Body	chr10:8100384-8100768	S_Shore		RDMR	NA	10:8101119-8101716	Unclassified_Cell_type_specific	GATA3	NM_002051
cg22952142	-0.211843	-8.59362	3.77631e-06	0.00444251	4.86744	15	68549178	F								TRUE			CLN6	AK293197
cg03217115	-0.134286	-8.59314	3.77832e-06	0.00444251	4.86692	2	118942841	F				chr2:118943823-118944199	N_Shore			TRUE	2:118942789-118944592	Promoter_Associated	Mir_544	.
cg08217285	-0.156384	-8.59019	3.79069e-06	0.00444251	4.86372	17	27917879	F	GIT1;GIT1	NM_014030;NM_001085454	TSS1500;TSS1500	chr17:27918161-27918398	N_Shore			TRUE	17:27917775-27919250	Unclassified	ANKRD13B	BC062597
cg09337852	-0.145313	-8.59007	3.79118e-06	0.00444251	4.86359	7	134464288	R	CALD1;CALD1;CALD1;CALD1;CALD1;CALD1	NM_033157;NM_033157;NM_033138;NM_004342;NM_004342;NM_033138	5'UTR;1stExon;1stExon;1stExon;5'UTR;5'UTR			low-CpG:134114680-134114964		NA			CALD1	NM_004342
cg01803461	-0.228195	-8.58784	3.80059e-06	0.00444251	4.86117	16	86604522	R				chr16:86599355-86602649	S_Shore		RDMR	NA			FOXC2	NM_005251
cg03123541	-0.157576	-8.58612	3.80781e-06	0.00444251	4.85931	1	95699097	F	RWDD3;RWDD3	NM_001128142;NM_015485	TSS1500;TSS1500	chr1:95699725-95700142	N_Shore			NA	1:95698735-95700504	Promoter_Associated	AK090700	AK090700
cg08093277	-0.0904246	-8.57211	3.86742e-06	0.00449937	4.84411	6	29595299	R	GABBR1;GABBR1;GABBR1	NM_021904;NM_021903;NM_001470	Body;1stExon;Body	chr6:29595298-29595795	Island			NA			GABBR1	NM_021903
cg16537676	-0.0965515	-8.56505	3.8978e-06	0.00452202	4.83645	6	30851624	R	DDR1;DDR1	NM_001954;NM_013993	TSS1500;TSS1500	chr6:30852102-30852676	N_Shore			NA			DDR1	NM_001954
cg07013104	-0.173231	-8.55742	3.93094e-06	0.00453471	4.82816	11	73357095	F	PLEKHB1;PLEKHB1;PLEKHB1;PLEKHB1	NM_001130033;NM_021200;NM_001130035;NM_001130034	TSS200;TSS200;TSS1500;TSS1500				RDMR	NA			PLEKHB1	NM_001130033
cg04605287	-0.20549	-8.55504	3.94138e-06	0.00453471	4.82556	1	54953486	F				chr1:54953893-54955287	N_Shore			NA			ACOT11	AK091112
cg09462269	-0.124894	-8.55477	3.94255e-06	0.00453471	4.82527	1	43751469	R	C1orf210;C1orf210	NM_001164829;NM_182517	TSS200;TSS1500					NA			C1orf210	NM_001164829
cg09747445	-0.165588	-8.55249	3.95253e-06	0.00453471	4.82279	15	70387268	R	TLE3;TLE3;TLE3	NM_001105192;NM_020908;NM_005078	Body;Body;Body	chr15:70387929-70393206	N_Shore			NA			TLE3	AK096779
cg19572055	-0.140246	-8.54589	3.98165e-06	0.0045555	4.8156	8	685830	R				chr8:686830-689496	N_Shore		RDMR	NA			BC022082	BC022082
cg24185628	-0.119919	-8.54334	3.99292e-06	0.0045558	4.81284	5	176829349	F	F12	NM_000505	Body	chr5:176829339-176829756	Island			NA	5:176829010-176830626	Promoter_Associated	PFN3	NM_001029886
cg07571928	-0.187548	-8.51489	4.12143e-06	0.00466959	4.78181	16	22020630	R	C16orf52	NM_001164579	Body	chr16:22018987-22020057	S_Shore			NA			C16orf52	NM_001164579
cg02345146	-0.183478	-8.50994	4.14423e-06	0.00466959	4.7764	1	85512957	F	MCOLN3	NM_018298	5'UTR	chr1:85513509-85514555	N_Shore			NA			MCOLN3	BX647497
cg02849695	-0.186566	-8.50647	4.1603e-06	0.00466959	4.77261	1	159869960	F	CCDC19	NM_012337	TSS200	chr1:159869901-159870143	Island			TRUE			CCDC19	NM_012337
cg11824191	-0.131636	-8.50544	4.16506e-06	0.00466959	4.77149	1	183274124	R	NMNAT2;NMNAT2	NM_170706;NM_015039	TSS200;Body					NA			NMNAT2	NM_170706
cg00492070	-0.136226	-8.50283	4.17724e-06	0.00466959	4.76863	3	107810716	F	CD47;CD47;CD47	NM_198793;NM_001025079;NM_001777	TSS1500;TSS1500;TSS1500	chr3:107809375-107810543	S_Shore			NA			CD47	NM_198793
cg00630991	-0.167963	-8.50141	4.18383e-06	0.00466959	4.76708	12	12252249	F	BCL2L14;BCL2L14;BCL2L14	NM_138723;NM_030766;NM_138722	3'UTR;3'UTR;3'UTR					NA			MIR1244-1	NR_036263
cg03822639	-0.100318	-8.501	4.18578e-06	0.00466959	4.76662	4	169552346	F	PALLD;PALLD;PALLD	NM_016081;NM_001166109;NM_001166108	Body;TSS1500;Body	chr4:169552716-169552947	N_Shore			NA	4:169552220-169552361	Unclassified_Cell_type_specific	PALLD	NM_001166109
cg24392955	-0.123405	-8.50014	4.18978e-06	0.00466959	4.76569	12	54454325	R	FLJ12825	NR_026655	Body	chr12:54454249-54454458	Island			TRUE			FLJ12825	NR_026655
cg14521421	-0.140721	-8.49809	4.19939e-06	0.00466959	4.76344	11	8862019	R	ST5	NM_005418	5'UTR					TRUE			5S_rRNA	.
cg04279801	-0.0889921	-8.49681	4.2054e-06	0.00466959	4.76204	17	19314319	R	RNF112	NM_007148	TSS200					TRUE			RNF112	AB026054
cg13758780	-0.131666	-8.49276	4.22448e-06	0.00467251	4.7576	9	124329514	F	DAB2IP	NM_032552	Body					TRUE			DAB2IP	NM_032552
cg01527307	-0.100934	-8.49146	4.23059e-06	0.00467251	4.75619	6	14500441	F								TRUE			CD83	NM_001040280
cg01795955	-0.175548	-8.48614	4.2558e-06	0.00467478	4.75036	2	200468626	F				chr2:200468551-200468958	Island			NA			BC035629	BC035629
cg05453820	-0.0940926	-8.48321	4.26976e-06	0.00467478	4.74715	8	81523903	F								TRUE	8:81523829-81523945	Unclassified_Cell_type_specific	Mir_562	.
cg00082939	-0.254279	-8.48313	4.27016e-06	0.00467478	4.74706	10	77165293	F	C10orf41;C10orf41	NR_024421;NR_024422	Body;Body	chr10:77155128-77169600	Island			NA	10:77165139-77165377	Unclassified_Cell_type_specific	ZNF503-AS2	NR_024422
cg10881242	-0.190582	-8.48018	4.28427e-06	0.00467478	4.74383	5	171057282	F				chr5:171057071-171057340	Island			TRUE	5:171056486-171058001	Unclassified_Cell_type_specific	FGF18	NM_003862
cg04889800	-0.138514	-8.47864	4.29164e-06	0.00467478	4.74214	1	16163555	R	FLJ37453	NR_024279	Body	chr1:16163752-16164123	N_Shore			NA	1:16163505-16163790	Unclassified	SPEN	NM_015001
cg07223180	-0.139172	-8.47682	4.30037e-06	0.00467478	4.74015	13	20989142	R	CRYL1	NM_015974	Body	chr13:20989007-20989836	Island			NA	13:20989114-20989355	Unclassified_Cell_type_specific	MIR4499	NR_039721
cg04898039	-0.254478	-8.47015	4.33261e-06	0.00469751	4.73283	7	2151184	F	MAD1L1;MAD1L1;MAD1L1	NM_003550;NM_001013837;NM_001013836	Body;Body;Body	chr7:2154677-2155252	N_Shelf			NA			MAD1L1	U33822
cg00944421	-0.266619	-8.46178	4.37341e-06	0.00472119	4.72364	16	68269483	F	ESRP2	NM_024939	Body	chr16:68269010-68272143	Island		RDMR	NA			ESRP2	AK025571
cg10825471	-0.14203	-8.46024	4.38097e-06	0.00472119	4.72194	10	134122566	R	STK32C	NM_173575	TSS1500	chr10:134120447-134122422	S_Shore			NA			STK32C	NM_173575
cg25822369	-0.130635	-8.45867	4.38866e-06	0.00472119	4.72022	2	222237362	R								TRUE	2:222237030-222237579	Unclassified_Cell_type_specific	EPHA4	BC026327
cg26995224	-0.206072	-8.45278	4.41774e-06	0.00472936	4.71374	12	121974146	R	KDM2B;KDM2B	NM_032590;NM_001005366	Body;Body	chr12:121975028-121976140	N_Shore		RDMR	TRUE	12:121974073-121974609	Promoter_Associated	KDM2B	AK027440
cg09776772	-0.165956	-8.4525	4.41909e-06	0.00472936	4.71345	7	2150534	F	MAD1L1;MAD1L1;MAD1L1	NM_003550;NM_001013837;NM_001013836	Body;Body;Body					NA			MAD1L1	U33822
cg10717869	-0.11737	-8.44537	4.45459e-06	0.00475507	4.7056	1	205780912	R	SLC41A1	NM_173854	5'UTR	chr1:205781870-205783010	N_Shore		RDMR	NA			SLC41A1	NM_173854
cg04498198	-0.194639	-8.44125	4.4752e-06	0.00475634	4.70107	17	27899966	R	TP53I13	NM_138349	3'UTR	chr17:27899511-27900067	Island			NA	17:27899504-27900251	Unclassified_Cell_type_specific	TP53I13	NM_138349
cg17527422	-0.121882	-8.44055	4.47875e-06	0.00475634	4.70029	12	48579245	F	C12orf68;C12orf68	NM_001013635;NM_001013635	3'UTR;1stExon	chr12:48577361-48578574	S_Shore			NA	12:48579151-48580993	Unclassified_Cell_type_specific	C12orf68	NM_001013635
cg17295878	-0.28906	-8.43294	4.51715e-06	0.00477325	4.69191	17	77924665	F	TBC1D16	NM_019020	Body	chr17:77922721-77922973	S_Shore		RDMR	NA	17:77924526-77925975	Unclassified_Cell_type_specific	TBC1D16	BC036947
cg22961459	-0.149111	-8.43111	4.52643e-06	0.00477325	4.6899	12	54763433	F	ZNF385A;ZNF385A;ZNF385A	NM_001130968;NM_015481;NM_001130967	3'UTR;3'UTR;3'UTR	chr12:54764065-54764510	N_Shore			NA			GPR84	NM_020370
cg02623200	-0.192258	-8.42686	4.54811e-06	0.00477325	4.68521	1	118727658	R	SPAG17	NM_206996	Body	chr1:118727816-118728097	N_Shore			TRUE			SPAG17	NM_206996
cg10904740	-0.112022	-8.42492	4.55805e-06	0.00477325	4.68307	5	36692236	R				chr5:36690207-36690658	S_Shore			NA	5:36692031-36693602	Unclassified	SLC1A3	NM_001166695
cg11945297	-0.173655	-8.42491	4.55806e-06	0.00477325	4.68307	8	102514634	F	GRHL2	NM_024915	Body					TRUE			GRHL2	AK310221
cg18183624	-0.186039	-8.4224	4.57095e-06	0.00477325	4.6803	17	47076904	R	IGF2BP1;IGF2BP1	NM_006546;NM_001160423	Body;Body	chr17:47072820-47076042	S_Shore		RDMR	NA			IGF2BP1	NM_006546
cg19051015	-0.20322	-8.42155	4.57534e-06	0.00477325	4.67935	17	46697414	R				chr17:46697413-46697701	Island		RDMR	NA			HOXB8	NM_024016
cg06397322	-0.137357	-8.40487	4.66199e-06	0.0048456	4.66094	19	48102118	R				chr19:48103497-48104086	N_Shore			NA	19:48102094-48102263	Unclassified_Cell_type_specific	GLTSCR1	NM_015711
cg21481950	-0.0933052	-8.4037	4.6681e-06	0.0048456	4.65966	6	29601498	F	GABBR1;GABBR1	NM_001470;NM_021904	TSS1500;TSS1500	chr6:29600192-29600661	S_Shore			NA			GABBR1	NM_001470
cg08784911	-0.110189	-8.39974	4.68899e-06	0.00485512	4.65527	1	204346839	F				chr1:204346732-204347430	Island			TRUE			LOC127841	NR_027022
cg21577356	-0.112143	-8.3925	4.72736e-06	0.00487827	4.64727	7	150021488	F	ACTR3C;LRRC61;LRRC61	NM_001164458;NM_023942;NM_001142928	TSS1500;5'UTR;5'UTR	chr7:150019950-150020752	S_Shore			TRUE	7:150019859-150021604	Promoter_Associated	ACTR3C	NM_001164458
cg06489606	-0.142516	-8.39075	4.73674e-06	0.00487827	4.64533	17	80251697	F				chr17:80250226-80251057	S_Shore			NA	17:80250168-80251839	Promoter_Associated	BC033560	BC033560
cg12067421	-0.0976996	-8.38799	4.75147e-06	0.00487827	4.64228	1	203246482	R				chr1:203242519-203242818	S_Shelf			NA	1:203246401-203246632	Unclassified_Cell_type_specific	CHIT1	AK131093
cg17356252	-0.172132	-8.38669	4.75846e-06	0.00487827	4.64083	21	45705686	R	AIRE	NM_000383	TSS200	chr21:45705428-45706044	Island			NA			AIRE	NM_000383
cg04873098	-0.183566	-8.37947	4.79736e-06	0.00490174	4.63284	1	3165191	F	PRDM16;PRDM16	NM_022114;NM_199454	Body;Body	chr1:3163969-3164643	S_Shore			NA			MIR4251	NR_036215
cg17802213	-0.170131	-8.37806	4.80502e-06	0.00490174	4.63127	3	185911316	F	DGKG;DGKG;DGKG	NM_001346;NM_001080744;NM_001080745	Body;Body;Body	chr3:185911344-185912228	N_Shore			TRUE	3:185911294-185911582	Unclassified_Cell_type_specific	ETV5	NM_004454
cg03613822	-0.238928	-8.37443	4.82474e-06	0.00490976	4.62725	17	7115140	R	DLG4;DLG4	NM_001365;NM_001128827	Body;Body	chr17:7117596-7118085	N_Shelf			NA	17:7114929-7115261	Unclassified_Cell_type_specific	ACADVL	AK293549
cg14906690	-0.246618	-8.36793	4.86025e-06	0.00493377	4.62005	10	76573506	F				chr10:76573195-76573507	Island			TRUE			KAT6B	NM_012330
cg02647265	-0.129223	-8.35933	4.90771e-06	0.00496692	4.6105	12	124456164	R	CCDC92	NM_025140	5'UTR	chr12:124456573-124458728	N_Shore			NA			CCDC92	AK222661
cg03785076	-0.156299	-8.35768	4.91689e-06	0.00496692	4.60867	2	241936915	R	SNED1	NM_001080437	TSS1500	chr2:241937716-241938468	N_Shore			TRUE			SNED1	NM_001080437
cg18786420	-0.122466	-8.35111	4.95358e-06	0.00499181	4.60136	5	172673715	F				chr5:172670829-172671824	S_Shore		RDMR	TRUE			NKX2-5	NM_001166176
cg12125332	-0.159171	-8.34435	4.9916e-06	0.005013	4.59385	14	75536561	F	FAM164C;FAM164C	NM_024643;NM_001042430	5'UTR;5'UTR	chr14:75535825-75536376	S_Shore			TRUE	14:75535650-75536678	Unclassified_Cell_type_specific	FAM164C	NM_024643
cg11878045	-0.107572	-8.34307	4.99881e-06	0.005013	4.59243	11	2482536	F	KCNQ1;KCNQ1	NM_000218;NM_181798	Body;TSS200					NA			KCNQ1	NR_040711
cg13408152	-0.165979	-8.33736	5.03126e-06	0.00503335	4.58608	3	120170474	R	FSTL1	NM_007085	TSS1500	chr3:120169202-120170519	Island			NA			FSTL1	AK300356
cg13428213	-0.144484	-8.32428	5.10637e-06	0.00508745	4.57151	9	98267529	R	PTCH1;PTCH1;PTCH1;PTCH1;PTCH1;PTCH1;PTCH1	NM_001083607;NM_001083605;NM_000264;NM_001083602;NM_001083606;NM_001083604;NM_001083603	5'UTR;5'UTR;Body;Body;5'UTR;5'UTR;Body	chr9:98268475-98271454	N_Shore		RDMR	NA			PTCH1	AB233423
cg11366178	-0.135294	-8.32357	5.11051e-06	0.00508745	4.57072	4	54457737	F	LNX1	NM_001126328	TSS200			low-CpG:54152409-54152522		TRUE			LNX1	NM_001126328
cg24361265	-0.278374	-8.32139	5.12317e-06	0.00508745	4.56828	15	44068668	F	ELL3	NM_025165	Body	chr15:44068586-44069792	Island		RDMR	TRUE	15:44068213-44070508	Promoter_Associated	BC062349	BC062349
cg19717060	0.0861494	8.31945	5.13447e-06	0.00508745	4.56612	17	70553078	F								NA	17:70552781-70554292	Unclassified	LOC100499467	NR_036488
cg18046394	-0.187475	-8.31516	5.15951e-06	0.00509939	4.56134	7	29924165	F	WIPF3	NM_001080529	Body	chr7:29923882-29924264	Island			NA			WIPF3	BC156551
cg25254074	-0.150571	-8.313	5.17215e-06	0.00509939	4.55893	6	41607326	F	MDFI	NM_005586	Body	chr6:41604583-41606663	S_Shore			NA			MDFI	AK290735
cg06602723	-0.147818	-8.31051	5.1868e-06	0.00509939	4.55615	17	46693336	R	HOXB8	NM_024016	TSS1500	chr17:46695325-46695553	N_Shore		RDMR	NA	17:46693234-46693357	Unclassified_Cell_type_specific	HOXB8	NM_024016
cg01996116	-0.199231	-8.30899	5.19577e-06	0.00509939	4.55445	3	42846907	R	HIGD1A;HIGD1A;HIGD1A	NM_014056;NM_001099668;NM_001099669	TSS1500;TSS1500;TSS1500	chr3:42845436-42846355	S_Shore			NA	3:42845207-42847170	Promoter_Associated	CCBP2	BC033952
cg00428382	-0.200156	-8.30436	5.22317e-06	0.00511416	4.54928	4	124427390	F				chr4:124426780-124427157	S_Shore		RDMR	TRUE			TRNA_Cys	.
cg06717905	-0.0782728	-8.28317	5.35052e-06	0.0052265	4.52559	11	115529573	R				chr11:115529997-115530548	N_Shore			NA			LOC283143	AK307308
cg09639133	-0.0882239	-8.27196	5.41927e-06	0.0052812	4.51304	5	146831209	F	DPYSL3	NM_001387	Body	chr5:146832560-146833938	N_Shore		RDMR	NA			DPYSL3	NM_001387
cg01105418	-0.0867254	-8.26596	5.45643e-06	0.00530494	4.50631	1	244214593	R	ZNF238;ZNF238	NM_205768;NM_205768	1stExon;5'UTR	chr1:244213397-244213619	S_Shore			NA			ZNF238	NM_205768
cg03146625	-0.241914	-8.26376	5.47014e-06	0.00530581	4.50384	12	54448729	F	HOXC4;HOXC4	NM_153633;NM_014620	Body;Body	chr12:54447744-54448091	S_Shore		RDMR	NA			HOXC4	NM_153633
cg13204699	-0.0941324	-8.24293	5.60179e-06	0.00540929	4.48044	13	50703841	F				chr13:50703685-50705025	Island			NA	13:50702745-50703962	Unclassified_Cell_type_specific	DLEU2	NR_002612
cg07348535	-0.105204	-8.24274	5.60295e-06	0.00540929	4.48024	11	67124319	F	LOC100130987	NR_024469	Body	chr11:67120856-67121228	S_Shelf			TRUE	11:67124206-67124757	Unclassified	POLD4	NM_021173
cg21519058	-0.0999622	-8.23748	5.63675e-06	0.00542926	4.47432	12	76404601	F								TRUE			PHLDA1	CCDS31861
cg05460571	-0.147104	-8.23498	5.6529e-06	0.00543219	4.4715	8	8630364	R								TRUE			CLDN23	NM_194284
cg23411518	-0.0941996	-8.22999	5.68526e-06	0.00545064	4.46589	15	57680479	F	CGNL1	NM_032866	5'UTR					TRUE			BC015433	BC015433
cg09584358	-0.204089	-8.22779	5.69953e-06	0.0054517	4.46342	17	14201680	R				chr17:14201726-14202052	N_Shore		RDMR	NA			HS3ST3B1	NM_006041
cg20125920	-0.21504	-8.22075	5.74565e-06	0.00548315	4.45549	10	21804624	R	C10orf140	NM_207371	Body	chr10:21805197-21805459	N_Shore		RDMR	NA	10:21804619-21804663	Unclassified_Cell_type_specific	AK055656	AK055656
cg11182874	-0.0837102	-8.21731	5.76834e-06	0.00548921	4.45161	8	102472508	F								TRUE			GRHL2	NM_024915
cg22466678	-0.18729	-8.21436	5.78787e-06	0.00548921	4.44828	12	89749033	F				chr12:89745168-89748144	S_Shore		CDMR	NA	12:89747962-89749741	Promoter_Associated	DUSP6	NM_022652
cg06223926	-0.171857	-8.21377	5.79176e-06	0.00548921	4.44762	10	33626522	F				chr10:33623120-33626197	S_Shore			NA			NRP1	BX648025
cg09516237	-0.100642	-8.21025	5.81514e-06	0.00549879	4.44365	2	10351540	F	C2orf48	NM_182626	3'UTR					NA			MIR4261	NR_036222
cg17113856	-0.177582	-8.20105	5.87679e-06	0.00554097	4.43327	6	32120895	R	PPT2;PRRT1;PPT2	NM_005155;NM_030651;NM_138717	TSS1500;TSS1500;TSS1500	chr6:32121829-32122529	N_Shore			TRUE	6:32120376-32123743	Promoter_Associated	PRRT1	BC013201
cg17445812	-0.0788892	-8.19961	5.8865e-06	0.00554097	4.43164	3	36986805	R	TRANK1	NM_014831	TSS1500	chr3:36985540-36987041	Island			NA	3:36985431-36987301	Promoter_Associated	TRANK1	NM_014831
cg08089567	-0.184214	-8.19671	5.90614e-06	0.00554541	4.42836	21	45705994	F	AIRE	NM_000383	1stExon	chr21:45705428-45706044	Island			NA			AIRE	NM_000383
cg24123198	-0.160872	-8.19161	5.94083e-06	0.00554541	4.42259	4	184018031	F				chr4:184018830-184021379	N_Shore			NA			C4orf38	NR_024008
cg25966016	-0.157008	-8.19115	5.94393e-06	0.00554541	4.42208	10	134353618	F	INPP5A	NM_005539	Body	chr10:134350302-134351119	S_Shelf			TRUE	10:134352924-134353672	Promoter_Associated_Cell_type_specific	INPP5A	AF273055
cg13555278	-0.150702	-8.19103	5.94478e-06	0.00554541	4.42194	1	26348484	F	EXTL1;EXTL1	NM_004455;NM_004455	1stExon;5'UTR					TRUE			EXTL1	NM_004455
cg00091633	-0.170711	-8.18204	6.00646e-06	0.00556121	4.41177	3	120170383	R	FSTL1	NM_007085	TSS1500	chr3:120169202-120170519	Island			NA			FSTL1	AK300356
cg21376136	-0.104367	-8.18076	6.01526e-06	0.00556121	4.41033	2	152830572	F	CACNB4;CACNB4;CACNB4;CACNB4	NM_000726;NM_001145798;NM_001005746;NM_001005747	Body;Body;Body;TSS200					NA			CACNB4	NM_001005747
cg19871388	-0.140504	-8.17882	6.02868e-06	0.00556121	4.40813	20	50419082	F	SALL4	NM_020436	TSS200	chr20:50417312-50419045	S_Shore		RDMR	NA			SALL4	AY170621
cg19741660	-0.184623	-8.17812	6.03353e-06	0.00556121	4.40734	14	100631897	R								NA	14:100631888-100632025	Unclassified_Cell_type_specific	DEGS2	NM_206918
cg10359157	-0.192698	-8.17765	6.03683e-06	0.00556121	4.4068	13	51418020	R	DLEU7	NM_198989	TSS200	chr13:51417371-51418149	Island		RDMR	NA			DLEU7	NM_198989
cg27331665	-0.255816	-8.17686	6.04228e-06	0.00556121	4.40591	11	316456	F				chr11:315739-316539	Island			NA	11:316185-316760	Unclassified_Cell_type_specific	BC040735	BC040735
cg24220031	-0.171646	-8.1722	6.07477e-06	0.00557523	4.40063	2	73402428	F				chr2:73402638-73404802	N_Shore		RDMR	NA			NOTO	NM_001134462
cg02803819	-0.0867805	-8.17081	6.08444e-06	0.00557523	4.39906	7	27141067	F	HOXA2	NM_006735	Body	chr7:27143181-27143479	N_Shelf		CDMR	TRUE			AK291164	AK291164
cg19197440	-0.100328	-8.16715	6.11011e-06	0.0055809	4.39491	17	1811269	F				chr17:1811473-1812097	N_Shore			TRUE			RPA1	NM_002945
cg14659930	-0.17141	-8.16609	6.11757e-06	0.0055809	4.39371	3	114128301	F	ZBTB20;ZBTB20;ZBTB20;ZBTB20;ZBTB20;ZBTB20	NM_001164345;NM_001164346;NM_001164347;NM_001164344;NM_015642;NM_001164343	5'UTR;5'UTR;5'UTR;5'UTR;5'UTR;5'UTR					TRUE			ZBTB20	NM_001164342
cg20184247	-0.232871	-8.15555	6.19228e-06	0.00563664	4.38175	17	46672052	F	LOC404266;LOC404266;LOC404266;HOXB5;LOC404266;LOC404266	NR_033203;NR_033204;NR_033201;NM_002147;NR_033205;NR_033202	Body;Body;Body;TSS1500;TSS1500;Body	chr17:46673532-46674181	N_Shore			NA	17:46670594-46672443	Unclassified	HOXB5	NM_002147
cg16537292	-0.109138	-8.14666	6.25596e-06	0.005649	4.37167	8	686186	R				chr8:686830-689496	N_Shore		RDMR	NA			BC022082	BC022082
cg15134801	-0.202821	-8.14579	6.26227e-06	0.005649	4.37067	5	60138838	F	ELOVL7;ELOVL7	NM_024930;NM_001104558	5'UTR;5'UTR	chr5:60139359-60140155	N_Shore			NA			ELOVL7	BC094792
cg09083345	-0.177727	-8.14542	6.26491e-06	0.005649	4.37026	6	1603532	F				chr6:1604606-1615866	N_Shore		CDMR	NA			FOXC1	NM_001453
cg01946191	-0.107745	-8.145	6.26799e-06	0.005649	4.36977	12	54444463	F	HOXC4	NM_014620	5'UTR	chr12:54445876-54446113	N_Shore		RDMR	NA	12:54443907-54444701	Unclassified	HOXC4	NM_153633
cg24841257	-0.111757	-8.14416	6.27406e-06	0.005649	4.36882	1	99126704	R	SNX7;SNX7	NM_015976;NM_152238	TSS1500;TSS1500	chr1:99126872-99127711	N_Shore			NA	1:99126334-99126803	Unclassified_Cell_type_specific	SNX7	NM_152238
cg23800435	-0.166331	-8.13865	6.31403e-06	0.0056676	4.36256	1	43751376	R	C1orf210;C1orf210	NM_001164829;NM_182517	TSS200;TSS200					TRUE			C1orf210	NM_001164829
cg27648238	-0.179716	-8.13754	6.32208e-06	0.0056676	4.3613	8	120685601	F								TRUE			ENPP2	NM_001130863
cg15467577	-0.10879	-8.13497	6.34085e-06	0.00566773	4.35838	19	35547085	R	HPN;HPN	NM_182983;NM_002151	Body;Body	chr19:35550550-35550832	N_Shelf			TRUE			HPN	AK095160
cg13519918	-0.17676	-8.13338	6.35249e-06	0.00566773	4.35657	12	89748985	F				chr12:89745168-89748144	S_Shore		CDMR	NA	12:89747962-89749741	Promoter_Associated	DUSP6	NM_022652
cg08991643	-0.280785	-8.13091	6.37064e-06	0.00566773	4.35376	3	194014928	F				chr3:194014480-194014983	Island			TRUE			LOC100131551	NR_024480
cg04066265	-0.182069	-8.12988	6.37823e-06	0.00566773	4.35259	8	19460243	F	CSGALNACT1;CSGALNACT1;CSGALNACT1	NM_001130518;NR_024040;NM_018371	TSS200;Body;5'UTR	chr8:19459905-19460137	S_Shore			NA			CSGALNACT1	NM_001130518
cg16182479	-0.0788604	-8.1282	6.39065e-06	0.00566773	4.35067	17	41832466	R	SOST	NM_025237	3'UTR	chr17:41832717-41833195	N_Shore			TRUE			SOST	NM_025237
cg22874989	-0.13196	-8.12594	6.40733e-06	0.00567038	4.3481	15	29277898	F	APBA2;APBA2	NM_005503;NM_001130414	5'UTR;5'UTR					TRUE			APBA2	NM_005503
cg05812266	-0.0959168	-8.11938	6.45602e-06	0.00570129	4.34064	6	29595194	R	GABBR1;GABBR1;GABBR1	NM_021904;NM_021903;NM_001470	Body;Body;Body	chr6:29595298-29595795	N_Shore			NA			GABBR1	NM_021903
cg04064050	-0.117171	-8.10846	6.53807e-06	0.00576146	4.32818	6	127663586	R	ECHDC1;ECHDC1;ECHDC1;ECHDC1;ECHDC1	NM_001002030;NM_001105544;NM_018479;NM_001139510;NM_001105545	5'UTR;5'UTR;5'UTR;TSS200;5'UTR	chr6:127664192-127664755	N_Shore			TRUE			ECHDC1	NM_001139510
cg06117341	-0.197556	-8.10633	6.5542e-06	0.00576341	4.32575	16	3062653	R	CLDN9;CLDN9	NM_020982;NM_020982	1stExon;5'UTR	chr16:3063679-3063981	N_Shore		CDMR	TRUE			CLDN9	NM_020982
cg25821785	-0.127956	-8.10366	6.57446e-06	0.00576898	4.32271	3	50403130	R	CACNA2D2;CACNA2D2	NM_001005505;NM_006030	Body;Body	chr3:50402103-50402942	S_Shore			TRUE	3:50402132-50403835	Promoter_Associated	Mir_324	.
cg25607643	-0.156275	-8.10026	6.60036e-06	0.00577946	4.31883	15	40730161	R				chr15:40728262-40728466	S_Shore		RDMR	NA			BAHD1	AB023162
cg08620329	-0.283796	-8.0905	6.67536e-06	0.0058328	4.30769	8	67454546	F				chr8:67454545-67454991	Island			TRUE			C8orf46	AK055047
cg07864647	-0.138744	-8.08847	6.69108e-06	0.00583422	4.30537	13	98959770	R	FARP1	NM_005766	Body					NA			AF339801	AF339801
cg00868766	-0.120757	-8.07993	6.75766e-06	0.00587661	4.2956	15	40364524	R								NA			LOC100131089	NR_040059
cg26376346	-0.0996291	-8.0786	6.76806e-06	0.00587661	4.29408	3	30647378	R	TGFBR2;TGFBR2	NM_001024847;NM_003242	TSS1500;TSS1500	chr3:30647987-30648881	N_Shore			NA			TGFBR2	NM_003242
cg11117637	-0.185209	-8.07214	6.81902e-06	0.00590847	4.28668	5	149546366	R	CDX1;CDX1	NM_001804;NM_001804	1stExon;5'UTR	chr5:149546027-149546988	Island			TRUE	5:149546249-149546400	Unclassified_Cell_type_specific	CDX1	NM_001804
cg07051221	-0.0810861	-8.06803	6.85156e-06	0.00592426	4.28198	12	53341805	F	KRT18;KRT18	NM_000224;NM_199187	TSS1500;TSS1500	chr12:53342805-53343162	N_Shore			NA			KRT18	NM_199187
cg05589489	-0.220923	-8.06108	6.90711e-06	0.00595788	4.27401	12	89748821	R				chr12:89745168-89748144	S_Shore		CDMR	NA	12:89747962-89749741	Promoter_Associated	DUSP6	NM_022652
cg07827420	-0.0811856	-8.05937	6.92084e-06	0.00595788	4.27205	17	75371764	F	SEPT9;SEPT9;SEPT9;SEPT9;SEPT9	NM_001113492;NM_001113493;NM_001113491;NM_006640;NM_001113494	5'UTR;Body;Body;Body;TSS1500	chr17:75368688-75370506	S_Shore		RDMR	TRUE			41161	NM_001113494
cg13583664	-0.0800347	-8.05526	6.95399e-06	0.00595788	4.26734	9	132016282	F								NA			AK308944	AK308944
cg03123759	-0.153786	-8.05447	6.96034e-06	0.00595788	4.26644	12	54763387	F	ZNF385A;ZNF385A;ZNF385A	NM_001130968;NM_015481;NM_001130967	3'UTR;3'UTR;3'UTR	chr12:54764065-54764510	N_Shore			NA			GPR84	NM_020370
cg25162533	-0.189097	-8.05422	6.96236e-06	0.00595788	4.26615	17	81032067	F				chr17:81032582-81032959	N_Shore			NA	17:81032038-81032240	Unclassified_Cell_type_specific	METRNL	NM_001004431
cg20512303	-0.161644	-8.05082	6.98997e-06	0.00596156	4.26224	5	131592959	R	PDLIM4;PDLIM4	NM_001131027;NM_003687	TSS1500;TSS1500	chr5:131593039-131593813	N_Shore			NA			PDLIM4	AK225407
cg13882377	-0.147572	-8.04658	7.02449e-06	0.00596156	4.25738	10	126211811	F	LHPP;LHPP	NM_022126;NM_001167880	Body;Body					TRUE			LHPP	NM_001167880
cg17296589	-0.152661	-8.04493	7.03796e-06	0.00596156	4.25549	13	113366074	R	ATP11A;ATP11A	NM_015205;NM_032189	Body;Body					TRUE	13:113365498-113366205	Unclassified_Cell_type_specific	ATP11A	NM_032189
cg00174500	-0.109389	-8.0442	7.04399e-06	0.00596156	4.25465	14	23846479	R	CMTM5;CMTM5	NM_138460;NM_001037288	1stExon;1stExon					TRUE			CMTM5	NM_001037288
cg24524285	-0.204272	-8.04251	7.05786e-06	0.00596156	4.2527	11	64405919	R	NRXN2;NRXN2;NRXN2	NM_138734;NM_138732;NM_015080	Body;Body;Body	chr11:64405451-64406006	Island			NA			NRXN2	NM_138734
cg10636490	-0.20402	-8.04028	7.07617e-06	0.00596156	4.25015	3	149687315	F	PFN2;PFN2	NM_002628;NM_053024	Body;Body	chr3:149687877-149689537	N_Shore		CDMR	NA			PFN2	AK297915
cg20030820	-0.143414	-8.04017	7.0771e-06	0.00596156	4.25002	6	41613165	R	MDFI	NM_005586	Body					TRUE			MDFI	AK290735
cg05485462	-0.139251	-8.0396	7.08181e-06	0.00596156	4.24936	16	3062349	F	CLDN9	NM_020982	TSS200	chr16:3063679-3063981	N_Shore			NA			CLDN9	NM_020982
cg10843343	-0.142634	-8.03774	7.09712e-06	0.00596233	4.24723	12	53298027	R	KRT8	NM_002273	Body	chr12:53297442-53297824	S_Shore		RDMR	TRUE			KRT8	NM_002273
cg25800753	-0.0988782	-8.03511	7.11892e-06	0.00596321	4.2442	10	94891725	R								TRUE			CYP26A1	NM_000783
cg17391620	-0.241124	-8.03414	7.12697e-06	0.00596321	4.24308	6	31734471	F	C6orf27	NM_025258	Body					NA			SAPCD1	AL122094
cg02992639	-0.147343	-8.0294	7.16642e-06	0.00598001	4.23763	1	155098827	F				chr1:155098434-155100451	Island			NA			EFNA1	NM_182685
cg04558175	-0.19692	-8.02807	7.17749e-06	0.00598001	4.23611	19	50031560	R	RCN3	NM_020650	5'UTR	chr19:50030981-50031300	S_Shore		RDMR	TRUE	19:50030870-50031704	Unclassified	RCN3	NM_020650
cg11327659	-0.138485	-8.02526	7.201e-06	0.00598001	4.23288	7	150037044	F	RARRES2	NM_002889	Body	chr7:150037459-150039031	N_Shore		CDMR	NA			RARRES2	NM_002889
cg02483701	-0.143731	-8.02481	7.2048e-06	0.00598001	4.23236	7	27215610	R	HOXA10	NM_153715	Body	chr7:27212416-27214396	S_Shore			NA	7:27215447-27215636	Unclassified_Cell_type_specific	HOXA10	NM_018951
cg13621396	-0.145766	-8.01946	7.24986e-06	0.00600538	4.2262	4	26861261	R	STIM2;STIM2;STIM2	NM_001169118;NM_001169117;NM_020860	TSS1500;TSS1500;TSS1500	chr4:26862031-26863238	N_Shore			TRUE			STIM2	NM_020860
cg22270027	-0.203967	-8.01677	7.27262e-06	0.00600603	4.22311	4	81128234	R				chr4:81128229-81128691	Island			NA			PRDM8	NM_001099403
cg23743554	-0.195626	-8.0137	7.29874e-06	0.00600603	4.21957	11	65321226	R	LTBP3;LTBP3;LTBP3	NM_001164266;NM_021070;NM_001130144	Body;Body;Body	chr11:65321225-65321823	Island			NA	11:65320619-65321442	Unclassified	U7	.
cg04312620	-0.0925959	-8.01255	7.30857e-06	0.00600603	4.21824	20	50419214	R	SALL4	NM_020436	TSS200	chr20:50417312-50419045	S_Shore		RDMR	NA			SALL4	AY170621
cg03222066	-0.114958	-8.01147	7.31777e-06	0.00600603	4.217	11	119019384	R	ABCG4;ABCG4	NM_001142505;NM_022169	TSS1500;TSS1500	chr11:119019643-119020887	N_Shore			NA	11:119019275-119020452	Unclassified_Cell_type_specific	ABCG4	NM_022169
cg00963171	-0.151134	-8.01084	7.32315e-06	0.00600603	4.21627	7	2151298	R	MAD1L1;MAD1L1;MAD1L1	NM_003550;NM_001013837;NM_001013836	Body;Body;Body	chr7:2154677-2155252	N_Shelf			NA			MAD1L1	U33822
cg17507667	-0.125597	-8.00743	7.35239e-06	0.0060156	4.21233	5	6467423	F	UBE2QL1	NM_001145161	Body					TRUE			UBE2QL1	NM_001145161
cg09168805	-0.14131	-8.00431	7.3792e-06	0.0060156	4.20874	1	94514548	R	ABCA4	NM_000350	Body					TRUE			ABCA4	AK310492
cg20118840	-0.179988	-8.00332	7.38772e-06	0.0060156	4.2076	11	119928838	R								TRUE			TRIM29	AX748104
cg13456470	-0.116175	-8.00197	7.3994e-06	0.0060156	4.20604	9	98266766	R	PTCH1;PTCH1;PTCH1;PTCH1;PTCH1;PTCH1;PTCH1	NM_001083607;NM_001083605;NM_000264;NM_001083602;NM_001083606;NM_001083604;NM_001083603	5'UTR;5'UTR;Body;Body;5'UTR;5'UTR;Body	chr9:98268475-98271454	N_Shore		RDMR	NA			PTCH1	AB233423
cg02649698	-0.0872362	-7.99928	7.42264e-06	0.0060156	4.20294	10	43818854	F				chr10:43818074-43818604	S_Shore			NA			FXYD4	NM_001184963
cg27478242	-0.194891	-7.99908	7.42441e-06	0.0060156	4.20271	12	54611928	F				chr12:54611595-54612038	Island		DMR	NA			MIR3198-2	NR_039851
cg17072519	-0.129066	-7.99721	7.44065e-06	0.0060156	4.20055	22	21322063	F	AIFM3;AIFM3;AIFM3;AIFM3	NM_144704;NM_001146288;NM_001018060;NR_027464	5'UTR;5'UTR;5'UTR;Body	chr22:21319178-21319912	S_Shelf			TRUE	22:21321959-21322249	Unclassified	AIFM3	NR_027464
cg12731773	-0.109544	-7.99601	7.45102e-06	0.0060156	4.19917	11	846055	R	TSPAN4;TSPAN4;TSPAN4;TSPAN4;TSPAN4;TSPAN4;TSPAN4	NM_001025236;NM_001025239;NM_001025238;NM_001025235;NM_003271;NM_001025237;NM_001025234	5'UTR;5'UTR;5'UTR;5'UTR;5'UTR;5'UTR;5'UTR	chr11:849087-850982	N_Shelf			TRUE	11:845952-846168	Unclassified_Cell_type_specific	TSPAN4	NM_001025237
cg13491563	-0.0990409	-7.98852	7.51654e-06	0.00605669	4.19052	3	183903302	R	ABCF3	NM_018358	TSS1500	chr3:183903386-183904495	N_Shore			NA	3:183903283-183904381	Promoter_Associated	ABCF3	AK092415
cg16182936	-0.107953	-7.9789	7.60165e-06	0.00611338	4.1794	3	13060741	R	IQSEC1	NM_001134382	Body					TRUE			IQSEC1	BC010267
cg03945400	-0.0668602	-7.97369	7.64812e-06	0.00613883	4.17338	15	38543209	F				chr15:38544002-38545532	N_Shore		RDMR	NA	15:38543172-38544768	Promoter_Associated	SPRED1	NM_152594
cg21117965	-0.282189	-7.96555	7.72142e-06	0.00617642	4.16395	2	220325369	R	SPEG	NM_005876	Body					TRUE			SPEG	NM_001173476
cg12150256	-0.201101	-7.96485	7.72772e-06	0.00617642	4.16314	3	50359849	F	HYAL2;HYAL2	NM_003773;NM_033158	5'UTR;TSS1500	chr3:50359839-50360042	Island			NA	3:50358176-50360136	Promoter_Associated	HYAL2	AK127945
cg20165545	-0.270381	-7.96353	7.73968e-06	0.00617642	4.16162	1	3166599	F	PRDM16;PRDM16	NM_022114;NM_199454	Body;Body	chr1:3163969-3164643	S_Shore			NA			MIR4251	NR_036215
cg04259752	-0.13978	-7.95647	7.80402e-06	0.00621578	4.15343	8	23262159	R	LOXL2	NM_002318	TSS1500	chr8:23260442-23261867	S_Shore		RDMR	NA			LOXL2	NM_002318
cg05985317	-0.153579	-7.95282	7.83756e-06	0.00623051	4.14919	6	32118208	R	PRRT1	NM_030651	Body	chr6:32118101-32118544	Island			NA			PRRT1	AK123424
cg14706297	-0.30194	-7.94931	7.86988e-06	0.00624422	4.14513	2	43328266	R				chr2:43327936-43328337	Island			NA			ZFP36L2	NM_006887
cg20025238	-0.116169	-7.94698	7.89138e-06	0.00624931	4.14243	7	128829789	F	SMO	NM_005631	Body	chr7:128828333-128829366	S_Shore		RDMR	NA			SMO	NM_005631
cg22784595	-0.147922	-7.94483	7.91138e-06	0.00625319	4.13993	10	7455714	R				chr10:7449376-7455339	S_Shore		RDMR	NA			SFMBT2	NM_001029880
cg27217474	-0.217338	-7.94052	7.95154e-06	0.00627296	4.13492	17	46697543	R				chr17:46697413-46697701	Island		RDMR	NA			HOXB8	NM_024016
cg09476130	-0.194957	-7.9383	7.97223e-06	0.00627457	4.13235	1	159870086	F	CCDC19	NM_012337	TSS200	chr1:159869901-159870143	Island			TRUE			CCDC19	NM_012337
cg19425295	-0.100655	-7.93677	7.98659e-06	0.00627457	4.13057	11	1989233	F				chr11:1990899-1991211	N_Shore			NA	11:1989151-1989284	Unclassified_Cell_type_specific	AK126380	AK126380
cg23280506	-0.202318	-7.93545	7.99903e-06	0.00627457	4.12903	17	14201938	F				chr17:14201726-14202052	Island			NA			HS3ST3B1	NM_006041
cg00602416	-0.12107	-7.92785	8.07081e-06	0.00630592	4.1202	10	21797819	F				chr10:21797632-21799341	Island			NA			AK055656	AK055656
cg26199857	-0.184185	-7.92705	8.07842e-06	0.00630592	4.11927	12	54764265	R	ZNF385A;ZNF385A;ZNF385A	NM_001130968;NM_001130967;NM_015481	Body;Body;Body	chr12:54764065-54764510	Island			NA	12:54763962-54764268	Unclassified	GPR84	NM_020370
cg25783099	-0.0927595	-7.92422	8.10534e-06	0.00630592	4.11598	2	42795486	F	MTA3	NM_020744	TSS200	chr2:42795847-42796230	N_Shore			NA	2:42795180-42796994	Promoter_Associated	MTA3	NM_020744
cg14962509	-0.205163	-7.9231	8.11603e-06	0.00630592	4.11467	1	36039655	F	TFAP2E	NM_178548	Body	chr1:36038927-36040051	Island			TRUE			TFAP2E	NM_178548
cg23135908	-0.107112	-7.92229	8.1237e-06	0.00630592	4.11374	11	1989715	F				chr11:1990899-1991211	N_Shore			TRUE			AK126380	AK126380
cg15175162	-0.153923	-7.9216	8.13035e-06	0.00630592	4.11293	4	15657657	F	FBXL5;FBXL5	NM_033535;NM_012161	TSS1500;TSS1500	chr4:15656364-15657739	Island			NA			FBXL5	NM_012161
cg09175009	-0.0953579	-7.91793	8.16555e-06	0.00632139	4.10866	16	10912699	F	FAM18A	NM_001079512	TSS200	chr16:10912159-10912719	Island			NA			FAM18A	AK124106
cg18168310	-0.121007	-7.91326	8.21055e-06	0.00633839	4.10322	11	68920771	R				chr11:68924690-68924957	N_Shelf			TRUE			BC064339	BC064339
cg23732781	-0.176466	-7.91209	8.22186e-06	0.00633839	4.10186	6	29595016	F	GABBR1;GABBR1;GABBR1	NM_021904;NM_021903;NM_001470	Body;Body;Body	chr6:29595298-29595795	N_Shore			NA			GABBR1	NM_021903
cg14858616	-0.116936	-7.9109	8.23342e-06	0.00633839	4.10047	10	72219819	R				chr10:72218130-72218484	S_Shore			NA			NODAL	NM_018055
cg26853787	-0.249409	-7.90638	8.27729e-06	0.00634783	4.09522	2	202904337	R				chr2:202897386-202901046	S_Shelf			NA			FZD7	NM_003507
cg01227744	-0.189537	-7.90566	8.2844e-06	0.00634783	4.09437	2	20644371	F				chr2:20646428-20647988	N_Shelf			NA			RHOB	NM_004040
cg09512548	-0.119527	-7.90491	8.29166e-06	0.00634783	4.0935	6	111983184	R	FYN;FYN;FYN	NM_153048;NM_153047;NM_002037	Body;Body;Body					TRUE			FYN	AY429536
cg23287992	-0.201352	-7.90262	8.31404e-06	0.00635321	4.09083	6	31734390	F	C6orf27	NM_025258	Body					NA			SAPCD1	AL122094
cg06555959	-0.302541	-7.89894	8.35025e-06	0.00636072	4.08654	8	61835620	R				chr8:61834699-61835871	Island			NA			LOC100130298	NR_034003
cg15127250	-0.180178	-7.8985	8.35457e-06	0.00636072	4.08602	12	51786489	F	GALNT6	NM_007210	TSS1500	chr12:51785279-51785821	S_Shore			NA	12:51786473-51786816	Unclassified	SLC4A8	AK128321
cg22268510	-0.278956	-7.8929	8.40993e-06	0.00637248	4.07949	6	32118420	R	PRRT1	NM_030651	Body	chr6:32118101-32118544	Island			NA			PRRT1	AK123424
cg03295417	-0.186124	-7.89264	8.41254e-06	0.00637248	4.07918	16	14397892	R	MIR193B	NR_030177	Body	chr16:14395604-14397075	S_Shore			NA			MIR193B	NR_030177
cg13078421	-0.100136	-7.89215	8.41732e-06	0.00637248	4.07862	19	2624622	R	GNG7	NM_052847	5'UTR	chr19:2622522-2622859	S_Shore			NA			BC022568	BC022568
cg18342462	-0.0809695	-7.89072	8.43157e-06	0.00637248	4.07695	11	111385659	R	C11orf88;C11orf88	NM_207430;NM_001100388	1stExon;1stExon	chr11:111385337-111385712	Island			NA	11:111385285-111386134	Unclassified_Cell_type_specific	C11orf88	NM_001100388
cg21885361	-0.241978	-7.88689	8.46976e-06	0.00638968	4.07248	7	127911034	F				chr7:127910860-127911287	Island			NA			LEP	D49487
cg24903893	-0.109751	-7.88155	8.52329e-06	0.00641838	4.06624	5	158522515	R	EBF1	NM_024007	Body	chr5:158523906-158524598	N_Shore		RDMR	NA			EBF1	AK303698
cg21510189	-0.128656	-7.87884	8.55065e-06	0.0064273	4.06307	5	133927987	R								TRUE			PHF15	AK025001
cg05487507	-0.146064	-7.87486	8.591e-06	0.00644592	4.05841	17	46671861	F	LOC404266;LOC404266;LOC404266;HOXB5;LOC404266;LOC404266	NR_033203;NR_033204;NR_033201;NM_002147;NR_033205;NR_033202	Body;Body;Body;TSS1500;TSS1500;Body	chr17:46673532-46674181	N_Shore			NA	17:46670594-46672443	Unclassified	HOXB5	NM_002147
cg07292773	-0.142407	-7.86717	8.66938e-06	0.00649297	4.04942	6	156718177	F				chr6:156718071-156718547	Island			TRUE	6:156717033-156718320	Unclassified	TRNA_Pseudo	.
cg05815196	-0.110192	-7.86528	8.6888e-06	0.00649578	4.04721	22	31536540	R	PLA2G3	NM_015715	TSS200					TRUE	22:31536121-31536683	Unclassified	PLA2G3	NM_015715
cg02984184	-0.157898	-7.86357	8.70642e-06	0.00649722	4.0452	11	35966322	R	LDLRAD3	NM_174902	Body	chr11:35965642-35966454	Island		RDMR	NA			LDLRAD3	BC143823
cg17818731	-0.206885	-7.85973	8.74601e-06	0.00651502	4.04071	2	43295753	F				chr2:43295212-43295555	S_Shore			TRUE			ZFP36L2	NM_006887
cg21869046	-0.20222	-7.85774	8.76664e-06	0.00651867	4.03838	19	41225005	R	ITPKC	NM_025194	Body	chr19:41222598-41223162	S_Shore			NA			ITPKC	NM_025194
cg21139046	-0.127878	-7.85418	8.80369e-06	0.00653449	4.03421	3	14339700	F				chr3:14339249-14339574	S_Shore			TRUE			AX747368	AX747368
cg05746014	-0.124433	-7.85198	8.82669e-06	0.00653939	4.03162	6	107860875	F	SOBP	NM_018013	Body					TRUE			SOBP	AX746661
cg03098721	-0.0923989	-7.85052	8.84188e-06	0.00653939	4.02992	1	84464084	F	TTLL7	NM_024686	5'UTR	chr1:84464223-84465232	N_Shore			NA			TTLL7	BC048970
cg13181164	-0.0874138	-7.84808	8.86756e-06	0.00654669	4.02705	15	37388828	F	MEIS2;MEIS2;MEIS2;MEIS2;MEIS2;MEIS2;MEIS2	NM_172316;NM_170674;NM_170675;NM_172315;NM_002399;NM_170677;NM_170676	Body;Body;Body;Body;Body;Body;Body	chr15:37390175-37390380	N_Shore		RDMR	NA			MEIS2	AK300247
cg07515565	-0.231176	-7.84511	8.89881e-06	0.00655059	4.02357	6	1624386	F	GMDS	NM_001500	3'UTR	chr6:1624185-1625468	Island			NA			FOXC1	NM_001453
cg13646480	-0.151635	-7.84457	8.90447e-06	0.00655059	4.02294	9	125110034	F				chr9:125109007-125109644	S_Shore			TRUE	9:125110014-125110219	Unclassified_Cell_type_specific	PTGS1	AK308222
cg13924715	-0.180243	-7.8379	8.97514e-06	0.00659087	4.01511	11	10750890	F								NA			CTR9	NM_014633
cg09187007	-0.160918	-7.83628	8.9924e-06	0.00659186	4.01321	1	3514990	F	MEGF6	NM_001409	Body	chr1:3511709-3512118	S_Shelf			TRUE			MEGF6	NM_001409
cg25152404	-0.101119	-7.82995	9.06015e-06	0.00661627	4.00578	1	225999183	F	EPHX1	NM_001136018	5'UTR	chr1:225997646-225998233	S_Shore			TRUE	1:225999090-225999968	Unclassified	EPHX1	NM_001136018
cg02228675	-0.161843	-7.82834	9.0775e-06	0.00661627	4.00388	17	40259724	R	DHX58	NM_024119	Body	chr17:40259521-40259829	Island			TRUE	17:40259479-40260669	Unclassified	DHX58	AK097669
cg12155036	-0.187204	-7.82733	9.08841e-06	0.00661627	4.00269	3	194015171	F				chr3:194014480-194014983	S_Shore			TRUE			LOC100131551	NR_024480
cg00756943	-0.118398	-7.82584	9.10448e-06	0.00661627	4.00094	15	91208460	R				chr15:91208319-91209026	Island			NA	15:91208408-91209698	Unclassified_Cell_type_specific	BC038778	BC038778
cg01520588	-0.123461	-7.82574	9.10558e-06	0.00661627	4.00082	6	41604603	R				chr6:41604583-41606663	Island	high-CpG:41712530-41712918		NA			MDFI	NM_005586
cg13030332	-0.148847	-7.82375	9.12709e-06	0.00662029	3.99849	12	115117351	F	TBX3;TBX3	NM_005996;NM_016569	Body;Body	chr12:115120774-115122945	N_Shelf		CDMR	TRUE			TBX3	AK304639
cg20021506	-0.15401	-7.82126	9.15408e-06	0.00662377	3.99556	6	156718546	F				chr6:156718071-156718547	Island			NA			TRNA_Pseudo	.
cg07118895	-0.0932375	-7.82036	9.16387e-06	0.00662377	3.9945	17	54398673	F	ANKFN1	NM_153228	Body					TRUE			BC037494	BC037494
cg25305703	-0.120752	-7.81463	9.22646e-06	0.00665254	3.98776	8	128378218	F								TRUE			POU5F1B	NM_001159542
cg02254407	-0.157342	-7.81212	9.25407e-06	0.00665254	3.9848	11	73357159	R	PLEKHB1;PLEKHB1;PLEKHB1;PLEKHB1	NM_001130033;NM_021200;NM_001130035;NM_001130034	TSS200;TSS200;TSS1500;TSS1500				RDMR	NA			PLEKHB1	NM_001130033
cg00222799	-0.146254	-7.81119	9.2643e-06	0.00665254	3.98371	21	43655464	F	ABCG1;ABCG1;ABCG1;ABCG1;ABCG1;ABCG1	NM_207628;NM_004915;NM_207174;NM_207627;NM_016818;NM_207629	Body;Body;Body;Body;Body;Body	chr21:43654846-43655465	Island			NA			5S_rRNA	.
cg23009263	-0.0912111	-7.81086	9.26793e-06	0.00665254	3.98332	14	100631741	F								NA			DEGS2	NM_206918
cg18559799	-0.0921838	-7.80472	9.33587e-06	0.00668972	3.97608	17	42018275	F	PPY	NM_002722	3'UTR	chr17:42015421-42015707	S_Shelf			NA	17:42017543-42018902	Unclassified	PPY	NM_002722
cg14301024	-0.131526	-7.803	9.35496e-06	0.00669181	3.97406	2	114048932	F	LOC440839	NR_029399	Body	chr2:114048828-114049055	Island			NA			PAX8	NM_003466
cg23657179	-0.283205	-7.7917	9.48158e-06	0.0067707	3.96074	10	77165025	F	C10orf41;C10orf41	NR_024421;NR_024422	Body;Body	chr10:77155128-77169600	Island			NA			ZNF503-AS2	NR_024422
cg19272540	-0.20724	-7.78379	9.57141e-06	0.00681601	3.9514	7	15055459	R								TRUE	7:15055271-15056120	Unclassified_Cell_type_specific	DGKB	AK304719
cg26047066	-0.15818	-7.78269	9.58397e-06	0.00681601	3.9501	1	221069136	R				chr1:221068782-221069159	Island		RDMR	NA			HLX	NM_021958
cg01827781	-0.0928581	-7.78172	9.59507e-06	0.00681601	3.94895	16	29875145	R	LOC440356;LOC440356;CDIPT	NR_024370;NR_015396;NM_006319	Body;TSS200;TSS1500	chr16:29873918-29874516	S_Shore			NA	16:29873871-29875327	Promoter_Associated	LOC440356	NR_015396
cg07399928	-0.126639	-7.77902	9.626e-06	0.00681601	3.94576	3	195538675	R	MUC4;MUC4;MUC4	NM_004532;NM_018406;NM_138297	1stExon;1stExon;1stExon					TRUE			MUC4	AK307054
cg06766541	-0.108405	-7.7789	9.62732e-06	0.00681601	3.94563	7	128556540	R				chr7:128555329-128556650	Island			NA			KCP	NM_001135914
cg20012601	-0.200178	-7.77485	9.67392e-06	0.00683732	3.94084	4	141013584	R	MAML3	NM_018717	Body					NA			BC040304	BC040304
cg19695978	-0.129836	-7.76906	9.74101e-06	0.006873	3.93399	15	70877381	R				chr15:70877380-70877958	Island			TRUE	15:70876822-70878328	Unclassified_Cell_type_specific	UACA	AL834243
cg02329835	-0.106753	-7.76636	9.77239e-06	0.00688342	3.9308	9	98315369	R				chr9:98315341-98315559	Island			TRUE			PTCH1	NM_001083602
cg07429038	-0.0682682	-7.75977	9.84958e-06	0.0069161	3.92301	7	138482826	F	ATP6V0A4;ATP6V0A4;TMEM213;ATP6V0A4;TMEM213;ATP6V0A4	NM_020632;NM_130840;NM_001085429;NM_020632;NM_001085429;NM_130840	1stExon;5'UTR;1stExon;5'UTR;5'UTR;1stExon					TRUE			TMEM213	NM_001085429
cg00129811	-0.120888	-7.75946	9.85321e-06	0.0069161	3.92264	6	116726398	R	DSE;DSE	NM_013352;NM_001080976	Body;Body					TRUE	6:116726329-116726522	Unclassified_Cell_type_specific	DSE	AK128607
cg04149978	-0.154329	-7.75813	9.86889e-06	0.0069161	3.92107	1	10764896	F	CASZ1;CASZ1	NM_001079843;NM_017766	5'UTR;5'UTR	chr1:10764449-10764925	Island			TRUE			CASZ1	AK293839
cg10397819	-0.143092	-7.75558	9.89909e-06	0.00692555	3.91804	14	75447512	R				chr14:75447511-75447779	Island			TRUE			EIF2B2	NM_014239
cg17284119	-0.128828	-7.7523	9.93786e-06	0.00694095	3.91416	6	110644424	R	C6orf186	NM_001123364	Body					TRUE			C6orf186	NM_001123364
cg16063162	-0.147765	-7.74923	9.97451e-06	0.00695482	3.91051	12	89721406	F								TRUE			DUSP6	NM_022652
cg12899423	-0.158218	-7.74438	1.00325e-05	0.0069835	3.90476	11	44328154	R	ALX4	NM_021926	Body	chr11:44325657-44326517	S_Shore		RDMR	NA	11:44326437-44328397	Unclassified_Cell_type_specific	ALX4	NM_021926
cg18689454	-0.156239	-7.74143	1.00679e-05	0.00699636	3.90127	21	45705694	R	AIRE	NM_000383	TSS200	chr21:45705428-45706044	Island			NA			AIRE	NM_000383
cg14192542	-0.108213	-7.73495	1.01463e-05	0.00702976	3.89358	17	64187581	R	CCDC46	NM_145036	5'UTR	chr17:64187712-64188586	N_Shore		RDMR	NA			CEP112	BC131805
cg00079023	-0.116924	-7.73466	1.01499e-05	0.00702976	3.89323	5	139492535	F	PURA	NM_005859	TSS1500	chr5:139492723-139492966	N_Shore			NA			PURA	NM_005859
cg17881200	-0.27364	-7.7286	1.02237e-05	0.0070691	3.88604	7	27138850	F				chr7:27135342-27136736	S_Shelf		RDMR	NA			HOTAIRM1	NR_038366
cg16442587	-0.0988388	-7.71992	1.03307e-05	0.00713113	3.87572	18	56514573	F								NA			ZNF532	BC130618
cg15925365	-0.173171	-7.71461	1.03967e-05	0.00716474	3.86941	6	52858998	F	GSTA4	NM_001512	Body	chr6:52859565-52859767	N_Shore		RDMR	TRUE			AK125212	AK125212
cg15283950	-0.129559	-7.70834	1.04751e-05	0.0072021	3.86195	11	10715217	R	MRVI1;MRVI1;MRVI1;MRVI1;MRVI1	NM_001100163;NM_001100163;NM_130385;NM_130385;NM_001100167	1stExon;5'UTR;1stExon;5'UTR;TSS200			low-CpG:10671608-10672092		TRUE			MRVI1	NM_001100167
cg25449315	-0.125417	-7.70667	1.04961e-05	0.0072021	3.85996	12	9064552	R				chr12:9066946-9067480	N_Shelf		RDMR	NA			PHC1	AB209063
cg07138399	-0.181377	-7.70612	1.0503e-05	0.0072021	3.85931	1	200272215	F				chr1:200271276-200271538	S_Shore			NA	1:200270611-200272226	Promoter_Associated_Cell_type_specific	C1orf98	NR_040064
cg11025974	-0.116464	-7.69891	1.05944e-05	0.0072437	3.85072	2	152830521	R	CACNB4;CACNB4;CACNB4;CACNB4	NM_000726;NM_001145798;NM_001005746;NM_001005747	Body;Body;Body;TSS200					NA			CACNB4	NM_001005747
cg23652484	-0.133073	-7.69857	1.05987e-05	0.0072437	3.85031	1	211872653	F								NA			NEK2	NM_002497
cg05308656	-0.193552	-7.69441	1.06518e-05	0.00726801	3.84536	2	235406291	F	ARL4C	NM_005737	TSS1500	chr2:235404502-235406541	Island		DMR	NA	2:235405028-235406635	Promoter_Associated_Cell_type_specific	ARL4C	NM_005737
cg13833596	-0.0918283	-7.68347	1.07929e-05	0.00735217	3.8323	2	120302499	R	PCDP1	NM_001029996	5'UTR	chr2:120301702-120302455	S_Shore			NA			PCDP1	AK293665
cg14553765	-0.134809	-7.67891	1.08522e-05	0.0073804	3.82686	22	19513078	R	CLDN5;CLDN5	NM_003277;NM_001130861	TSS1500;TSS1500	chr22:19510871-19512254	S_Shore			NA	22:19512893-19513221	Unclassified_Cell_type_specific	CLDN5	NM_003277
cg17158414	-0.121363	-7.67686	1.0879e-05	0.00738651	3.82441	2	27665306	F	KRTCAP3;KRTCAP3	NM_001168364;NM_173853	1stExon;1stExon	chr2:27665251-27665670	Island		DMR	NA	2:27664962-27665570	Promoter_Associated	KRTCAP3	AY358993
cg23829949	-0.152054	-7.67359	1.09219e-05	0.00740351	3.82051	1	244214679	F	ZNF238;ZNF238	NM_205768;NM_205768	1stExon;5'UTR	chr1:244213397-244213619	S_Shore			NA			ZNF238	NM_205768
cg23629935	-0.184551	-7.67003	1.09688e-05	0.00742318	3.81625	14	90167459	F				chr14:90167782-90168352	N_Shore		CDMR	NA	14:90167257-90168591	Promoter_Associated	7SK	.
cg06913600	-0.097232	-7.66592	1.10234e-05	0.0074479	3.81133	2	43020682	F	HAAO	NM_012205	TSS1500	chr2:43019665-43020509	S_Shore			NA	2:43020634-43020928	Unclassified	HAAO	AK295693
cg18428193	-0.176273	-7.66429	1.10449e-05	0.00744902	3.80939	2	27665017	R	KRTCAP3;NRBP1;KRTCAP3	NM_173853;NM_013392;NM_001168364	TSS1500;3'UTR;TSS1500	chr2:27664939-27665151	Island			NA	2:27664962-27665570	Promoter_Associated	KRTCAP3	NM_001168364
cg26388730	-0.125266	-7.66271	1.10661e-05	0.00744902	3.80749	11	64405764	F	NRXN2;NRXN2;NRXN2	NM_138734;NM_138732;NM_015080	Body;Body;Body	chr11:64405451-64406006	Island			NA			NRXN2	NM_138734
cg08012287	-0.103955	-7.66093	1.10898e-05	0.00744902	3.80536	11	66315298	R	ACTN3	NM_001104	Body	chr11:66313169-66313822	S_Shore			NA	11:66315239-66315593	Unclassified_Cell_type_specific	ACTN3	NM_001104
cg06171329	-0.118286	-7.6604	1.10969e-05	0.00744902	3.80473	8	97389586	R								TRUE			PTDSS1	NM_014754
cg02449166	-0.0595819	-7.65715	1.11405e-05	0.00746612	3.80084	10	131748481	F	EBF3	NM_001005463	Body					TRUE			EBF3	AK097335
cg23790219	-0.11835	-7.64822	1.12611e-05	0.00753476	3.79015	17	71301599	F	CDC42EP4	NM_012121	5'UTR					TRUE			CDC42EP4	AB042237
cg17516571	-0.123527	-7.64264	1.13373e-05	0.00756497	3.78345	8	49584227	F								TRUE			EFCAB1	NR_024605
cg04715503	-0.271679	-7.64224	1.13427e-05	0.00756497	3.78298	16	3062795	F	CLDN9;CLDN9	NM_020982;NM_020982	1stExon;5'UTR	chr16:3063679-3063981	N_Shore			TRUE	16:3062733-3062975	Unclassified_Cell_type_specific	CLDN9	NM_020982
cg10282491	-0.168727	-7.64056	1.13657e-05	0.00756812	3.78097	16	3062368	R	CLDN9	NM_020982	TSS200	chr16:3063679-3063981	N_Shore			NA			CLDN9	NM_020982
cg01510388	-0.234112	-7.63871	1.13912e-05	0.00757287	3.77875	8	65711658	R	CYP7B1	NM_004820	TSS1500	chr8:65710990-65711722	Island			NA			CYP7B1	NM_004820
cg21644740	-0.171432	-7.63609	1.14273e-05	0.00758199	3.7756	6	29599248	F	GABBR1;GABBR1	NM_021904;NM_001470	Body;Body	chr6:29600192-29600661	N_Shore		RDMR	NA			GABBR1	AF301005
cg09222115	-0.111594	-7.63506	1.14415e-05	0.00758199	3.77437	2	241079766	F	OTOS	NM_148961	5'UTR	chr2:241075403-241075916	S_Shelf			NA			OTOS	NM_148961
cg22113926	-0.0983323	-7.62895	1.15263e-05	0.00762509	3.76704	17	28566331	R				chr17:28562387-28563186	S_Shelf		RDMR	NA			SLC6A4	NM_001045
cg03704673	-0.230135	-7.6267	1.15577e-05	0.00762509	3.76433	17	4692287	R	GLTPD2;GLTPD2	NM_001014985;NM_001014985	5'UTR;1stExon	chr17:4692249-4693977	Island			NA			GLTPD2	NM_001014985
cg19025461	-0.156356	-7.62571	1.15715e-05	0.00762509	3.76315	1	16163610	R	FLJ37453	NR_024279	Body	chr1:16163752-16164123	N_Shore			NA	1:16163505-16163790	Unclassified	SPEN	NM_015001
cg05265607	-0.145283	-7.62509	1.15802e-05	0.00762509	3.76241	10	98900817	F	SLIT1	NM_003061	Body					TRUE			LOC100505540	NR_038330
cg10456541	-0.160374	-7.62208	1.16225e-05	0.00764082	3.75878	2	8721512	R				chr2:8723855-8724093	N_Shelf			NA	2:8721258-8721513	Unclassified_Cell_type_specific	ID2	NM_002166
cg13916835	-0.191786	-7.62054	1.16441e-05	0.00764291	3.75694	17	2078431	F	SMG6;SMG6	NM_017575;NM_001170957	Body;Body					TRUE	17:2077941-2078890	Unclassified_Cell_type_specific	AJ276246	AJ276246
cg01713950	-0.166273	-7.61223	1.17619e-05	0.00769951	3.74694	1	17766995	F	RCC2	NM_018715	TSS1500	chr1:17764072-17765811	S_Shore			NA	1:17766694-17767257	Promoter_Associated	RCC2	NM_018715
cg16779251	-0.091921	-7.61102	1.17791e-05	0.00769951	3.74549	17	45928077	R	SP6	NM_199262	5'UTR	chr17:45928211-45928710	N_Shore		RDMR	NA	17:45927810-45928919	Unclassified	SP6	AK127707
cg14485097	-0.163819	-7.61053	1.17861e-05	0.00769951	3.7449	7	4671479	F								TRUE	7:4670879-4671628	Unclassified_Cell_type_specific	FOXK1	BC038434
cg22486834	-0.178978	-7.6078	1.18252e-05	0.00771283	3.74161	6	52859107	R	GSTA4	NM_001512	5'UTR	chr6:52859565-52859767	N_Shore		RDMR	TRUE			GSTA4	BC063439
cg04500896	-0.170421	-7.59816	1.19641e-05	0.00777596	3.73001	2	74775717	F	LOXL3	NM_032603	Body	chr2:74776016-74776897	N_Shore			NA			DOK1	NM_001197260
cg01790353	-0.113623	-7.59761	1.19721e-05	0.00777596	3.72935	1	17674483	F	PADI4	NM_012387	Body					TRUE			PADI6	NM_207421
cg05568941	-0.113937	-7.59653	1.19878e-05	0.00777596	3.72804	17	38517913	F	GJD3;GJD3	NM_152219;NM_152219	1stExon;3'UTR	chr17:38518965-38520264	N_Shore			NA			GJD3	BC153089
cg04981619	-0.231077	-7.59478	1.20132e-05	0.00777596	3.72594	2	43328122	F				chr2:43327936-43328337	Island			NA			ZFP36L2	NM_006887
cg00741945	-0.0960785	-7.5946	1.20158e-05	0.00777596	3.72572	16	89114669	F				chr16:89114529-89114863	Island			NA			AK055272	AK055272
cg04289036	-0.164734	-7.59101	1.20683e-05	0.00779776	3.72139	1	43751270	R	C1orf210;C1orf210;C1orf210	NM_001164829;NM_001164829;NM_182517	1stExon;5'UTR;TSS200					TRUE			C1orf210	NM_001164829
cg01754713	-0.192568	-7.58933	1.20929e-05	0.00780149	3.71937	16	31226334	R	TRIM72	NM_001008274	Body	chr16:31225956-31228264	Island		DMR	NA			TRIM72	NM_001008274
cg17976121	-0.149343	-7.58802	1.21121e-05	0.00780173	3.71779	11	69451115	R				chr11:69451136-69458596	N_Shore			TRUE			CCND1	NM_053056
cg17986992	-0.0821145	-7.58509	1.21553e-05	0.00781423	3.71426	1	159825761	F	VSIG8;C1orf204	NM_001013661;NM_001134233	Body;TSS1500	chr1:159824006-159825011	S_Shore			NA			C1orf204	NM_001134233
cg27219972	-0.188411	-7.58415	1.21693e-05	0.00781423	3.71311	16	85479264	R								TRUE			LOC727710	NR_038858
cg19478539	-0.0668411	-7.58178	1.22043e-05	0.00782456	3.71026	17	39957639	F								TRUE	17:39957433-39958298	Unclassified	LEPREL4	NM_006455
cg26799250	-0.134676	-7.5799	1.22322e-05	0.00782495	3.70799	17	6358415	R	PITPNM3;PITPNM3	NM_001165966;NM_031220	3'UTR;3'UTR	chr17:6358414-6358955	Island			NA			FAM64A	NM_019013
cg19399165	-0.124236	-7.57919	1.22427e-05	0.00782495	3.70714	2	27301252	F	EMILIN1	NM_007046	TSS200					TRUE			EMILIN1	NM_007046
cg27438980	-0.0959463	-7.5726	1.23412e-05	0.00786604	3.69917	15	99195143	F	IGF1R	NM_000875	Body	chr15:99190446-99194559	S_Shore		CDMR	NA	15:99194894-99195556	Unclassified_Cell_type_specific	IGF1R	AB463073
cg03800939	-0.102547	-7.57191	1.23515e-05	0.00786604	3.69834	11	124933814	F	SLC37A2;SLC37A2	NM_198277;NM_001145290	Body;Body	chr11:124932730-124933657	S_Shore			NA	11:124932464-124933869	Promoter_Associated	SLC37A2	NM_198277
cg27051129	-0.147104	-7.57034	1.23751e-05	0.00786604	3.69644	13	51417977	F	DLEU7	NM_198989	TSS200	chr13:51417371-51418149	Island		RDMR	NA			DLEU7	NM_198989
cg03679544	-0.135563	-7.56982	1.23829e-05	0.00786604	3.69582	6	155537972	R	TIAM2;TIAM2	NM_012454;NM_001010927	Body;TSS200	chr6:155539975-155540193	N_Shelf			TRUE			TIAM2	NM_001010927
cg02276831	-0.128471	-7.5661	1.24391e-05	0.00788472	3.69132	9	35406117	R	LOC158381;LOC158381	NR_003581;NR_003582	TSS1500;TSS1500					TRUE			ATP8B5P	NR_003581
cg07379741	-0.0637273	-7.56312	1.24842e-05	0.00788472	3.68772	17	7311030	F	NLGN2	NM_020795	TSS1500	chr17:7311672-7312063	N_Shore			NA	17:7310640-7311428	Unclassified_Cell_type_specific	NLGN2	NM_020795
cg10198479	-0.157204	-7.56214	1.24992e-05	0.00788472	3.68653	16	85268435	F				chr16:85269192-85269464	N_Shore			NA			LINC00311	NR_038859
cg24807169	-0.0809149	-7.56176	1.2505e-05	0.00788472	3.68607	4	101439954	F	EMCN;EMCN	NM_001159694;NM_016242	TSS1500;TSS1500					NA			EMCN	NM_001159694
cg08240539	-0.126031	-7.56102	1.25161e-05	0.00788472	3.68518	7	2282600	R	FTSJ2;NUDT1;NUDT1;NUDT1;NUDT1;NUDT1;NUDT1;NUDT1;NUDT1;NUDT1	NM_013393;NM_002452;NM_198949;NM_198950;NM_198948;NM_198954;NM_198953;NM_198952;NM_198953;NM_198954	TSS1500;5'UTR;5'UTR;5'UTR;5'UTR;1stExon;5'UTR;5'UTR;1stExon;5'UTR	chr7:2281362-2282105	S_Shore			NA	7:2281235-2282660	Promoter_Associated	NUDT1	NM_198953
cg24601030	-0.214491	-7.56034	1.25266e-05	0.00788472	3.68436	11	111847747	F	DIXDC1;DIXDC1	NM_033425;NM_001037954	TSS1500;Body	chr11:111847927-111848401	N_Shore			NA	11:111847446-111849375	Promoter_Associated	DIXDC1	NM_033425
cg04959634	-0.0983215	-7.55684	1.258e-05	0.00790637	3.68012	7	27219224	F	HOXA10	NM_153715	Body	chr7:27219309-27219750	N_Shore			NA	7:27218624-27220804	Unclassified	HOXA10	NR_037939
cg11980800	-0.12624	-7.55413	1.26215e-05	0.00792042	3.67685	1	9748107	F	PIK3CD	NM_005026	5'UTR	chr1:9749295-9750228	N_Shore			NA	1:9746710-9748190	Promoter_Associated	BC038541	BC038541
cg07429284	-0.121555	-7.55209	1.2653e-05	0.00792816	3.67437	5	132107420	R	SEPT8;SEPT8;SEPT8;SEPT8	NM_001098812;NM_001098813;NM_001098811;NM_015146	Body;5'UTR;Body;Body					TRUE			41160	AK057797
cg01887374	-0.226996	-7.54597	1.27476e-05	0.00796923	3.66697	2	129077404	R	HS6ST1	NM_004807	TSS1500	chr2:129075197-129077639	Island			NA			HS6ST1	NM_004807
cg10866062	-0.106202	-7.54449	1.27706e-05	0.00796923	3.66517	17	72358370	F	BTBD17	NM_001080466	TSS1500	chr17:72356096-72356327	S_Shelf			TRUE			BTBD17	NM_001080466
cg26132737	-0.221302	-7.54331	1.27891e-05	0.00796923	3.66374	2	198029141	R	ANKRD44	NM_153697	Body	chr2:198029068-198029438	Island			TRUE			ANKRD44	CCDS33355
cg23306453	-0.0733677	-7.5429	1.27955e-05	0.00796923	3.66324	6	29599012	R	GABBR1;GABBR1	NM_021904;NM_001470	Body;Body	chr6:29600192-29600661	N_Shore			NA			GABBR1	AF301005
cg11380327	-0.120235	-7.53859	1.28628e-05	0.00799913	3.65802	2	24715213	F				chr2:24713710-24715168	S_Shore			NA			NCOA1	AK226063
cg15712310	-0.195807	-7.53548	1.29117e-05	0.0080175	3.65425	16	73100790	F				chr16:73099812-73100791	Island			NA			ZFHX3	NM_001164766
cg11985480	-0.245411	-7.53377	1.29387e-05	0.00802221	3.65217	2	74729100	F	LOC151534;LBX2	NR_024606;NM_001009812	TSS1500;Body	chr2:74729399-74731166	N_Shore		RDMR	NA	2:74728052-74729181	Unclassified_Cell_type_specific	LOC151534	NR_024606
cg21124375	-0.158939	-7.53028	1.29938e-05	0.00802919	3.64794	2	232765392	F				chr2:232765246-232765491	Island		DMR	TRUE	2:232765043-232766392	Unclassified	MIR1471	NR_031717
cg17867420	-0.077348	-7.52901	1.30141e-05	0.00802919	3.6464	3	68984818	F				chr3:68980783-68982035	S_Shelf			NA			FAM19A4	NM_182522
cg20899625	-0.143329	-7.52832	1.30249e-05	0.00802919	3.64557	3	126721131	R	PLXNA1	NM_032242	Body					TRUE	3:126721074-126721723	Unclassified_Cell_type_specific	PLXNA1	NM_032242
cg11960677	-0.0984157	-7.52816	1.30275e-05	0.00802919	3.64537	1	32705760	R	MTMR9L	NR_026850	Body	chr1:32705524-32707141	Island			NA			MTMR9LP	BC015407
cg19481355	-0.0830126	-7.52533	1.30726e-05	0.00804501	3.64194	6	28830310	R				chr6:28831682-28832134	N_Shore			NA			LOC401242	NR_033379
cg17665699	-0.184207	-7.5219	1.31275e-05	0.00806685	3.63776	17	19771612	F	ULK2;ULK2	NM_014683;NM_001142610	TSS1500;TSS1500	chr17:19771609-19771814	Island			NA			ULK2	NM_001142610
cg02723291	-0.113878	-7.51174	1.32915e-05	0.00814464	3.62542	12	22777465	R	ETNK1;ETNK1	NM_018638;NM_001039481	TSS1500;TSS1500	chr12:22777988-22778301	N_Shore			NA			ETNK1	AL137750
cg00823843	-0.139018	-7.51162	1.32935e-05	0.00814464	3.62527	1	244094885	F				chr1:244094755-244095117	Island			NA			LOC339529	NR_033883
cg10885338	-0.0979731	-7.50698	1.33691e-05	0.00817888	3.61963	2	106682640	F	C2orf40	NM_032411	Body	chr2:106681982-106682403	S_Shore			TRUE			C2orf40	NM_032411
cg13451356	-0.0989333	-7.50236	1.34449e-05	0.00821312	3.61401	1	40598648	R				chr1:40598508-40599209	Island			TRUE			RLF	NM_012421
cg22000727	-0.164666	-7.49821	1.35132e-05	0.00824271	3.60896	6	3459199	R				chr6:3456061-3457963	S_Shore		RDMR	NA			SLC22A23	BC040876
cg17900689	-0.133533	-7.49069	1.36383e-05	0.00830675	3.5998	17	4649262	F	ZMYND15;ZMYND15	NM_001136046;NM_032265	Body;Body					NA			ZMYND15	BC067296
cg09484541	-0.239176	-7.4862	1.37135e-05	0.00834031	3.59432	5	74161187	F	FAM169A	NM_015566	5'UTR	chr5:74161536-74162716	N_Shore			NA			FAM169A	BX640902
cg21228424	-0.120956	-7.4823	1.37792e-05	0.008368	3.58957	6	42678314	F	PRPH2	NM_000322	Body					TRUE			PRPH2	NM_000322
cg20265748	-0.137019	-7.48042	1.3811e-05	0.00837502	3.58727	14	89017615	R	PTPN21	NM_007039	5'UTR	chr14:89017660-89017972	N_Shore			NA	14:89017457-89018332	Unclassified	PTPN21	AK310480
cg04664126	-0.141924	-7.47348	1.3929e-05	0.00842631	3.57881	6	28554262	F	SCAND3	NM_052923	1stExon	chr6:28554863-28555124	N_Shore		RDMR	NA			SCAND3	NM_052923
cg04359753	-0.0680489	-7.47306	1.39363e-05	0.00842631	3.57829	6	19839767	F	ID4	NM_001546	3'UTR	chr6:19837504-19839314	S_Shore			NA			ID4	NM_001546
cg05123976	-0.114606	-7.46562	1.4064e-05	0.00849115	3.56921	17	45949677	R				chr17:45949676-45949885	Island			NA			BC031827	BC031827
cg12065616	-0.149169	-7.46275	1.41137e-05	0.00849718	3.5657	12	94954828	F								TRUE	12:94954793-94954844	Unclassified_Cell_type_specific	TMCC3	AB032971
cg13614409	-0.274932	-7.46267	1.41151e-05	0.00849718	3.5656	13	31506752	F	C13orf26	NM_152325	TSS200					NA			LOC100507064	NR_038288
cg14354168	-0.252602	-7.46086	1.41464e-05	0.0085037	3.5634	6	1619134	R				chr6:1619093-1621094	Island		RDMR	TRUE			FOXC1	NM_001453
cg15869022	-0.17338	-7.4585	1.41876e-05	0.00851608	3.5605	2	128404486	F	GPR17;GPR17;LIMS2;LIMS2;LIMS2;GPR17;LIMS2;LIMS2;GPR17	NM_005291;NM_001161415;NM_001136037;NM_001161403;NM_017980;NM_001161416;NM_001161404;NR_027823;NM_001161417	5'UTR;5'UTR;Body;Body;Body;5'UTR;Body;Body;5'UTR					NA			GPR17	NM_001161415
cg24569831	-0.118198	-7.45562	1.42378e-05	0.00851727	3.55698	15	93617168	R	RGMA;RGMA;RGMA;RGMA;RGMA;RGMA;RGMA	NM_001166283;NM_001166289;NM_020211;NM_001166283;NM_001166286;NM_001166287;NM_001166288	1stExon;TSS1500;Body;5'UTR;TSS1500;5'UTR;TSS1500	chr15:93615622-93617185	Island			NA	15:93616879-93617246	Unclassified_Cell_type_specific	RGMA	NM_001166283
cg18869061	-0.115328	-7.45469	1.42542e-05	0.00851727	3.55584	15	100272053	F	LYSMD4	NM_152449	Body	chr15:100272901-100273891	N_Shore			NA			LYSMD4	BC084545
cg02799880	-0.169343	-7.45364	1.42725e-05	0.00851727	3.55456	13	99630462	R	DOCK9;DOCK9;DOCK9;DOCK9	NM_015296;NM_001130049;NM_001130048;NM_001130050	Body;Body;TSS200;TSS200					TRUE			DOCK9	NM_001130048
cg11027707	-0.154775	-7.45221	1.42976e-05	0.00851727	3.55281	3	49967669	R	MON1A;MON1A	NM_001142501;NM_032355	TSS1500;TSS1500	chr3:49967121-49967472	S_Shore			NA	3:49966709-49967749	Promoter_Associated	MON1A	NM_001142501
cg16290689	-0.141537	-7.45218	1.42982e-05	0.00851727	3.55277	13	31506685	R	C13orf26	NM_152325	TSS200					NA			LOC100507064	NR_038288
cg04859826	-0.118616	-7.45108	1.43175e-05	0.00851727	3.55143	1	59479179	F								TRUE			HSD52	NR_027120
cg07412254	-0.123134	-7.44988	1.43387e-05	0.00851727	3.54995	2	121223534	F	LOC84931	NR_027181	Body					TRUE			LOC84931	NR_027181
cg17231677	-0.108893	-7.44901	1.43541e-05	0.00851727	3.54889	10	102671993	F	FAM178A;FAM178A;FAM178A	NM_001136123;NM_018121;NR_024245	TSS1500;TSS1500;TSS1500	chr10:102672367-102673159	N_Shore			NA			FAM178A	NM_018121
cg26256793	-0.126565	-7.44494	1.44261e-05	0.00854777	3.54391	1	103574469	R	COL11A1;COL11A1;COL11A1;COL11A1	NM_001168249;NM_080629;NM_080630;NM_001854	TSS1500;TSS1500;TSS1500;TSS1500					TRUE			COL11A1	NM_080629
cg23109344	-0.221394	-7.43312	1.46375e-05	0.00866064	3.52942	8	496440	F	C8orf42	NM_175075	TSS1500	chr8:494155-496083	S_Shore		RDMR	NA			C8orf42	FJ381685
cg18453320	-0.135942	-7.42916	1.4709e-05	0.00868695	3.52457	6	1616109	R				chr6:1604606-1615866	S_Shore		RDMR	NA	6:1616062-1616208	Unclassified_Cell_type_specific	FOXC1	NM_001453
cg18149394	-0.156849	-7.42834	1.47239e-05	0.00868695	3.52356	2	242446735	R	STK25	NM_006374	Body	chr2:242447017-242448558	N_Shore			NA	2:242446208-242446957	Unclassified_Cell_type_specific	STK25	X99325
cg12664119	-0.0898893	-7.42437	1.47961e-05	0.00871714	3.51869	1	119532352	F	TBX15	NM_152380	TSS200	chr1:119529819-119530712	S_Shore			TRUE			TBX15	NM_152380
cg15657704	-0.128525	-7.42107	1.48565e-05	0.00874026	3.51464	10	116164955	R	AFAP1L2;AFAP1L2	NM_032550;NM_001001936	TSS1500;TSS1500	chr10:116163391-116164599	S_Shore		RDMR	NA			AFAP1L2	NM_032550
cg22277296	-0.166779	-7.41836	1.49061e-05	0.00874846	3.51132	5	54180170	F				chr5:54179363-54180171	Island			NA	5:54179231-54180227	Unclassified_Cell_type_specific	ESM1	NM_001135604
cg06744585	-0.131568	-7.415	1.49681e-05	0.00874846	3.50719	19	13135808	F	NFIX	NM_002501	Body	chr19:13135317-13136169	Island	low-CpG:12995149-12996848		NA			NFIX	HQ258405
cg01708636	-0.0718834	-7.4141	1.49846e-05	0.00874846	3.50609	4	166301085	R	CPE	NM_001873	Body	chr4:166299975-166300668	S_Shore		RDMR	NA			CPE	NM_001873
cg20415486	-0.0843673	-7.41324	1.50005e-05	0.00874846	3.50503	10	3949206	R								TRUE			KLF6	NM_001160124
cg17186388	-0.133892	-7.41319	1.50016e-05	0.00874846	3.50496	7	29923435	R	WIPF3	NM_001080529	Body	chr7:29923882-29924264	N_Shore		CDMR	NA			WIPF3	BC156551
cg01066472	-0.190981	-7.41222	1.50195e-05	0.00874846	3.50377	1	75591029	F				chr1:75590817-75591354	Island			NA			LHX8	NM_001001933
cg12236088	-0.207342	-7.41205	1.50225e-05	0.00874846	3.50357	2	105275812	F				chr2:105275588-105275940	Island			NA			LOC284998	AX746619
cg13680337	-0.110213	-7.41114	1.50394e-05	0.00874846	3.50245	10	71626580	F	COL13A1;COL13A1;COL13A1;COL13A1;COL13A1;COL13A1;COL13A1;COL13A1;COL13A1;COL13A1;COL13A1;COL13A1;COL13A1;COL13A1;COL13A1;COL13A1;COL13A1;COL13A1;COL13A1;COL13A1	NM_080798;NM_080809;NM_080800;NM_080811;NM_080810;NM_080799;NM_080813;NM_005203;NM_080815;NM_080807;NM_080801;NM_080808;NM_080814;NM_080802;NM_080812;NM_080805;NM_080806;NM_080804;NM_080803;NM_001130103	Body;Body;Body;Body;Body;Body;Body;Body;Body;Body;Body;Body;Body;Body;Body;Body;Body;Body;Body;Body					TRUE			COL13A1	NM_080800
cg13691108	-0.148703	-7.40692	1.5118e-05	0.00878183	3.49726	20	37433247	F	PPP1R16B	NM_015568	TSS1500	chr20:37434206-37435592	N_Shore		RDMR	NA			PPP1R16B	NM_001172735
cg11931626	-0.1762	-7.40148	1.52199e-05	0.00882866	3.49057	4	184679532	R				chr4:184679531-184679788	Island			NA			U6	.
cg14424963	-0.0892916	-7.39732	1.52983e-05	0.00886173	3.48545	9	139472899	R								TRUE	9:139472695-139473520	Unclassified_Cell_type_specific	AX747706	AX747706
cg21795221	-0.199777	-7.39368	1.53674e-05	0.0088775	3.48096	6	156718262	F				chr6:156718071-156718547	Island			TRUE	6:156717033-156718320	Unclassified	TRNA_Pseudo	.
cg19473656	-0.130405	-7.39362	1.53684e-05	0.0088775	3.48089	14	23623663	R	SLC7A8;SLC7A8	NM_012244;NM_182728	Body;TSS200					TRUE			SLC7A8	NM_182728
cg27009812	-0.232412	-7.3861	1.55121e-05	0.00894801	3.47163	16	3062597	F	CLDN9;CLDN9	NM_020982;NM_020982	1stExon;5'UTR	chr16:3063679-3063981	N_Shore		CDMR	TRUE			CLDN9	NM_020982
cg01693598	-0.123682	-7.38448	1.55431e-05	0.00895257	3.46964	1	47998637	R				chr1:47998899-47999517	N_Shore			NA			FOXD2	NM_004474
cg03923640	-0.172705	-7.38344	1.55632e-05	0.00895257	3.46835	16	87174624	F								NA			AK125749	AK125749
cg22151644	-0.0840633	-7.38211	1.55888e-05	0.00895487	3.46671	12	54444047	R	HOXC4	NM_014620	5'UTR	chr12:54445876-54446113	N_Shore		RDMR	NA	12:54443907-54444701	Unclassified	HOXC4	NM_153633
cg27508620	-0.202426	-7.38027	1.56243e-05	0.00896281	3.46444	7	21209725	R								NA			SP4	BC109301
cg16049246	-0.0669954	-7.37364	1.57531e-05	0.00902419	3.45626	11	76464026	F								TRUE			TSKU	NM_015516
cg02273436	-0.152743	-7.3717	1.5791e-05	0.00903342	3.45387	4	55143269	F	PDGFRA	NM_006206	Body					NA			PDGFRA	X76079
cg13468961	-0.124001	-7.37045	1.58154e-05	0.0090349	3.45233	2	172944338	R	MAP1D	NM_199227	Body	chr2:172944988-172945384	N_Shore			NA	2:172944226-172944461	Unclassified_Cell_type_specific	DLX1	NM_001038493
cg19495650	-0.183298	-7.36691	1.5885e-05	0.00906214	3.44796	10	65226682	R	JMJD1C	NM_032776	TSS1500	chr10:65224870-65225887	S_Shore			NA			JMJD1C	NM_032776
cg02772663	-0.0870028	-7.36309	1.59605e-05	0.00909268	3.44323	10	121172898	R	GRK5	NM_005308	Body					TRUE	10:121172761-121172899	Unclassified_Cell_type_specific	MIR4681	NR_039829
cg19137107	-0.121983	-7.36009	1.60198e-05	0.00911394	3.43953	11	44541999	F				chr11:44541537-44541956	S_Shore			NA			CD82	NM_001024844
cg04322572	-0.0978205	-7.35735	1.60743e-05	0.00913242	3.43615	10	43447618	F								TRUE			RET	NM_020975
cg16467811	-0.0931604	-7.35109	1.61998e-05	0.00918146	3.4284	4	139832064	F								TRUE			CCRN4L	NM_012118
cg20547777	-0.193837	-7.35083	1.6205e-05	0.00918146	3.42808	8	119086580	F	EXT1	NM_000127	Body					TRUE			AK025288	AK025288
cg16619378	-0.262048	-7.34639	1.62944e-05	0.00921954	3.42259	17	14207530	F	HS3ST3B1;MGC12916	NM_006041;NR_026880	Body;Body	chr17:14204168-14207702	Island		DMR	NA			MGC12916	NR_026880
cg14016875	-0.262619	-7.34426	1.63376e-05	0.00922394	3.41995	17	14206981	F	HS3ST3B1;MGC12916	NM_006041;NR_026880	Body;TSS200	chr17:14204168-14207702	Island		CDMR	NA	17:14205319-14207043	Promoter_Associated	MGC12916	NR_026880
cg03575602	-0.107593	-7.34341	1.6355e-05	0.00922394	3.4189	10	12390599	F	CAMK1D;CAMK1D	NM_020397;NM_153498	TSS1500;TSS1500	chr10:12390802-12392589	N_Shore			NA			CAMK1D	NM_153498
cg04015962	-0.194335	-7.34223	1.6379e-05	0.00922394	3.41743	1	10949192	F								NA			C1orf127	AK094437
cg16263848	-0.151098	-7.34062	1.64117e-05	0.00922394	3.41544	17	9018806	F	NTN1	NM_004822	Body	chr17:9018996-9019207	N_Shore			TRUE			NTN1	NM_004822
cg10095777	-0.21624	-7.34053	1.64136e-05	0.00922394	3.41533	6	31734292	R	C6orf27	NM_025258	Body					NA			SAPCD1	AL122094
cg00031973	-0.182028	-7.33867	1.64516e-05	0.00922398	3.41302	7	47783848	F								NA			LINC00525	NR_038407
cg25122233	-0.251128	-7.33835	1.64582e-05	0.00922398	3.41262	12	54412506	R	HOXC4;HOXC5;HOXC6	NM_014620;NR_003084;NM_153693	5'UTR;Body;5'UTR	chr12:54412990-54413346	N_Shore			NA	12:54411351-54412742	Unclassified	HOXC5	NR_003084
cg13187827	-0.190553	-7.33628	1.65004e-05	0.00923515	3.41007	6	31734192	R	C6orf27	NM_025258	Body					NA			SAPCD1	AL122094
cg07312357	-0.158142	-7.33401	1.65471e-05	0.0092435	3.40725	1	217263805	F	ESRRG;ESRRG;ESRRG	NM_206594;NM_206595;NM_001134285	TSS1500;TSS1500;5'UTR	chr1:217262998-217263214	S_Shore			NA			ESRRG	NM_001243505
cg16641055	-0.096833	-7.3333	1.65617e-05	0.0092435	3.40637	16	88846292	F	FAM38A	NM_001142864	Body	chr16:88844943-88845205	S_Shore			TRUE			PIEZO1	NM_001142864
cg13714026	-0.173325	-7.3323	1.65823e-05	0.0092435	3.40513	10	73385503	R	CDH23;CDH23	NM_052836;NM_022124	Body;Body					TRUE	10:73385491-73385538	Unclassified_Cell_type_specific	CDH23	AX748323
cg20328456	-0.141792	-7.32606	1.67115e-05	0.00930302	3.39739	6	32121113	R	PPT2;PPT2;PRRT1	NM_138717;NM_005155;NM_030651	TSS200;TSS1500;TSS1500	chr6:32121829-32122529	N_Shore			TRUE	6:32120376-32123743	Promoter_Associated	PPT2	NM_138717
cg14201634	-0.111434	-7.31796	1.68807e-05	0.0093846	3.38735	11	111831876	F	DIXDC1	NM_001037954	Body					TRUE			DIXDC1	NM_033425
cg13708645	-0.166179	-7.31579	1.69265e-05	0.0093941	3.38465	12	121974305	R	KDM2B;KDM2B	NM_032590;NM_001005366	Body;Body	chr12:121975028-121976140	N_Shore			TRUE	12:121974073-121974609	Promoter_Associated	KDM2B	AK027440
cg20982735	-0.168239	-7.31482	1.6947e-05	0.0093941	3.38344	8	87082023	F	PSKH2	NM_033126	TSS200	chr8:87081653-87082046	Island			NA			PSKH2	NM_033126
cg26122451	-0.120814	-7.31392	1.69659e-05	0.0093941	3.38233	7	92672950	R				chr7:92672789-92673016	Island		DMR	NA			SAMD9	CCDS34680
cg01293485	-0.132815	-7.30497	1.71562e-05	0.00948183	3.37121	3	42847044	R	HIGD1A;HIGD1A;HIGD1A	NM_014056;NM_001099668;NM_001099669	TSS1500;TSS1500;TSS1500	chr3:42845436-42846355	S_Shore			NA	3:42845207-42847170	Promoter_Associated	CCBP2	BC033952
cg10764196	-0.167189	-7.30407	1.71755e-05	0.00948183	3.37009	8	10489270	R	RP1L1	NM_178857	5'UTR					NA			RP1L1	NM_178857
cg19828220	0.153907	7.30325	1.7193e-05	0.00948183	3.36907	17	46682413	R	LOC404266;LOC404266;HOXB6	NR_033204;NR_033201;NM_018952	Body;Body;TSS200	chr17:46685244-46685449	N_Shelf			NA			HOXB6	AK292200
cg10962524	-0.165301	-7.29986	1.72658e-05	0.0095093	3.36486	5	83017009	F	HAPLN1	NM_001884	TSS200	chr5:83017894-83018358	N_Shore			NA			HAPLN1	NM_001884
cg10554624	-0.100327	-7.2969	1.73298e-05	0.00953188	3.36117	1	53386618	R	ECHDC2	NM_018281	Body	chr1:53386617-53387523	Island			NA	1:53386424-53387818	Promoter_Associated	ECHDC2	AK299834
cg17930194	-0.20273	-7.29276	1.74196e-05	0.00956857	3.35601	9	124982834	F	LHX6;LHX6	NM_199160;NM_014368	Body;Body	chr9:124981535-124982835	Island		CDMR	NA			LHX6	NM_001242335
cg01456368	-0.138258	-7.28513	1.75863e-05	0.00964735	3.34651	3	52351859	F	DNAH1	NM_015512	5'UTR					NA	3:52351326-52352105	Unclassified_Cell_type_specific	DNAH1	AK125990
cg03879180	-0.125733	-7.28159	1.76641e-05	0.00967719	3.34211	2	24713283	R				chr2:24713710-24715168	N_Shore		CDMR	NA			NCOA1	AK226063
cg22169053	-0.152048	-7.27832	1.77365e-05	0.00970402	3.33803	1	32281460	F	SPOCD1	NM_144569	5'UTR					NA	1:32281240-32281900	Unclassified	SPOCD1	AX746730
cg26627956	-0.0816717	-7.27703	1.77651e-05	0.00970685	3.33642	2	202004766	R	CFLAR;CFLAR;CFLAR	NM_001127184;NM_001127183;NM_003879	Body;Body;Body					NA			CFLAR	NM_001202515
cg08234689	-0.326167	-7.27336	1.78468e-05	0.00973454	3.33184	7	127910927	F				chr7:127910860-127911287	Island			NA			LEP	D49487
cg00055341	-0.12944	-7.27264	1.78627e-05	0.00973454	3.33095	2	200446845	R								TRUE			BC035629	BC035629
cg03061677	-0.0991746	-7.27098	1.78999e-05	0.00974199	3.32887	20	36149185	F	BLCAP;BLCAP;BLCAP;BLCAP;NNAT;NNAT;BLCAP	NM_001167821;NM_001167820;NM_001167822;NM_006698;NM_181689;NM_005386;NM_001167823	5'UTR;5'UTR;5'UTR;5'UTR;TSS1500;TSS1500;5'UTR	chr20:36148603-36150136	Island			NA			NNAT	NM_181689
cg13497903	-0.131466	-7.26916	1.79408e-05	0.00975	3.3266	14	90920641	F								TRUE			LOC400238	NR_033986
cg23052055	-0.106415	-7.26784	1.79703e-05	0.00975	3.32496	1	3606042	R	TP73;TP73;TP73;TP73	NM_001126240;NM_001126242;NM_005427;NM_001126241	TSS1500;TSS1500;Body;TSS1500	chr1:3607096-3607553	N_Shore			NA			TP73	NM_001126241
cg21811021	-0.242102	-7.26718	1.79853e-05	0.00975	3.32413	4	6659346	R				chr4:6659271-6659787	Island			NA	4:6659292-6659534	Unclassified_Cell_type_specific	LOC93622	BC021542
cg12405048	-0.0881849	-7.26545	1.80241e-05	0.00975829	3.32198	12	112074086	F								TRUE			ATXN2	NM_002973
cg20380897	-0.114148	-7.26401	1.80568e-05	0.00976321	3.32017	15	77876657	R								TRUE			LINGO1	NM_032808
cg02486415	-0.13718	-7.25752	1.8204e-05	0.00983	3.31206	12	52263387	F				chr12:52262627-52263215	S_Shore			NA			ANKRD33	BC121152
cg11064966	-0.0922245	-7.25481	1.82659e-05	0.00985054	3.30868	5	32506514	R								TRUE			ZFR	NM_016107
cg10593400	-0.145385	-7.25183	1.83342e-05	0.0098745	3.30496	1	86044176	F	DDAH1	NM_001134445	TSS200	chr1:86042229-86042935	S_Shore			TRUE	1:86042473-86044309	Unclassified	DDAH1	NM_001134445
cg22261669	-0.125953	-7.24897	1.84001e-05	0.00989717	3.30137	13	98959799	R	FARP1	NM_005766	Body					NA			AF339801	AF339801
cg01209984	-0.128856	-7.24746	1.84349e-05	0.00990298	3.29949	21	47469679	F							RDMR	TRUE			COL6A2	NM_001849
cg20524889	-0.129532	-7.24491	1.84939e-05	0.00992184	3.2963	13	73649835	R	KLF5	NM_001730	Body					TRUE			KLF5	NM_001730
cg25642234	-0.159674	-7.24289	1.85409e-05	0.00993418	3.29377	12	14721092	F	PLBD1	NM_024829	TSS1500	chr12:14720248-14721093	Island		CDMR	NA			PLBD1	NM_024829
cg14009688	-0.174087	-7.23854	1.86423e-05	0.00997561	3.28832	7	134464242	R	CALD1;CALD1;CALD1;CALD1;CALD1;CALD1	NM_033157;NM_033157;NM_033138;NM_004342;NM_004342;NM_033138	5'UTR;1stExon;1stExon;1stExon;5'UTR;5'UTR			low-CpG:134114680-134114964		NA			CALD1	NM_004342
cg04334496	-0.111133	-7.23392	1.87506e-05	0.0100206	3.28254	6	133953605	R								TRUE			AK093513	AK093513
cg13934236	-0.109849	-7.23239	1.87865e-05	0.0100269	3.28063	22	43507609	F	BIK	NM_001197	5'UTR	chr22:43506500-43507610	Island			NA	22:43506176-43507734	Promoter_Associated	BIK	NM_001197
cg11631063	-0.179008	-7.22915	1.88632e-05	0.0100549	3.27656	4	184679835	F				chr4:184679531-184679788	S_Shore			NA			U6	.
cg01466133	-0.13124	-7.22758	1.89004e-05	0.0100617	3.2746	20	36149022	F	BLCAP;BLCAP;BLCAP;BLCAP;NNAT;NNAT;BLCAP	NM_001167821;NM_001167820;NM_001167822;NM_006698;NM_181689;NM_005386;NM_001167823	5'UTR;5'UTR;5'UTR;5'UTR;TSS1500;TSS1500;5'UTR	chr20:36148603-36150136	Island			NA			NNAT	NM_181689
cg06906952	-0.0540366	-7.22524	1.89561e-05	0.0100784	3.27166	1	244230760	R								TRUE			AK310634	AK310634
cg00263619	-0.110536	-7.22105	1.90561e-05	0.0101186	3.2664	12	94727462	F	CCDC41;CCDC41	NM_001042399;NM_016122	Body;Body					TRUE			PLXNC1	NR_037687
cg03760191	-0.0987069	-7.21973	1.90879e-05	0.0101225	3.26474	10	22623047	R				chr10:22623350-22625875	N_Shore		RDMR	NA			SPAG6	NM_172242
cg10928544	-0.16452	-7.21836	1.91206e-05	0.0101269	3.26303	14	91862864	F	CCDC88C	NM_001080414	Body					NA			CCDC88C	AK302839
cg03070187	-0.0545054	-7.2132	1.92451e-05	0.0101798	3.25655	19	6739184	F	TRIP10	NM_004240	TSS1500	chr19:6739883-6740158	N_Shore			NA			TRIP10	AB072596
cg23261715	-0.0811219	-7.20553	1.94317e-05	0.0102611	3.24692	12	54144380	F				chr12:54144562-54145470	N_Shore		CDMR	NA	12:54144031-54146347	Unclassified	CALCOCO1	NM_020898
cg23513600	-0.13707	-7.20485	1.94484e-05	0.0102611	3.24606	3	171171401	F	TNIK;TNIK;TNIK;TNIK;TNIK;TNIK;TNIK;TNIK;TNIK	NM_001161563;NM_001161566;NM_001161560;NR_027767;NM_001161565;NM_001161561;NM_015028;NM_001161562;NM_001161564	Body;Body;Body;Body;Body;Body;Body;Body;Body					TRUE	3:171170963-171171712	Unclassified_Cell_type_specific	TNIK	NR_027767
cg17058475	-0.048282	-7.2038	1.94741e-05	0.0102611	3.24474	11	68607737	R	CPT1A;CPT1A	NM_001876;NM_001031847	5'UTR;5'UTR	chr11:68608155-68609419	N_Shore			NA			CPT1A	NM_001876
cg17223809	-0.110826	-7.20283	1.94978e-05	0.0102611	3.24353	1	86620676	R	COL24A1	NM_152890	Body	chr1:86621278-86622871	N_Shore			NA			COL24A1	BC143718
cg17642369	-0.152994	-7.19708	1.96394e-05	0.0103224	3.2363	7	47783644	R								NA			LINC00525	NR_038407
cg10923408	-0.166858	-7.19254	1.9752e-05	0.0103685	3.23059	13	31506710	F	C13orf26	NM_152325	TSS200					NA			LOC100507064	NR_038288
cg12695465	-0.183458	-7.19115	1.97868e-05	0.0103736	3.22884	6	10556147	F	GCNT2;GCNT2;GCNT2	NM_001491;NM_001491;NM_145649	5'UTR;1stExon;Body					TRUE			GCNT2	NM_001491
cg23102632	-0.144732	-7.18945	1.98291e-05	0.0103814	3.2267	20	50723227	F	ZFP64	NM_199427	Body	chr20:50721310-50721912	S_Shore		RDMR	NA			ZFP64	AK022690
cg25264948	-0.215289	-7.18854	1.98519e-05	0.0103814	3.22556	6	31734232	F	C6orf27	NM_025258	Body					NA			SAPCD1	AL122094
cg06260709	-0.257808	-7.18174	2.00229e-05	0.0104576	3.21699	20	48626621	R				chr20:48626436-48626976	Island			NA			SNAI1	NM_005985
cg26950867	-0.176022	-7.18067	2.00499e-05	0.0104586	3.21564	2	216299856	F	FN1;FN1;FN1;FN1;FN1;FN1;FN1	NM_054034;NM_212475;NM_212476;NM_212478;NM_212474;NM_212482;NM_002026	Body;Body;Body;Body;Body;Body;Body	chr2:216300267-216300997	N_Shore		RDMR	NA	2:216299759-216300020	Unclassified_Cell_type_specific	FN1	NM_054034
cg02294302	-0.126762	-7.17903	2.00915e-05	0.0104598	3.21357	1	47906276	F	FOXD2;FOXD2	NM_004474;NM_004474	3'UTR;1stExon	chr1:47902793-47905518	S_Shore		RDMR	NA			FOXD2	NM_004474
cg01775897	-0.0679398	-7.17858	2.01027e-05	0.0104598	3.21301	14	73146637	F	DPF3	NM_012074	Body					TRUE			DPF3	AK126074
cg09871637	-0.136333	-7.17694	2.01444e-05	0.0104683	3.21094	1	87800511	F	LMO4	NM_006769	Body	chr1:87800835-87801252	N_Shore			NA	1:87799869-87802023	Promoter_Associated	LMO4	BC065818
cg05259872	-0.128136	-7.17584	2.01725e-05	0.0104698	3.20955	4	169552310	F	PALLD;PALLD;PALLD	NM_016081;NM_001166109;NM_001166108	Body;TSS1500;Body	chr4:169552716-169552947	N_Shore			NA	4:169552220-169552361	Unclassified_Cell_type_specific	PALLD	NM_001166109
cg23058037	-0.194272	-7.17247	2.02584e-05	0.0104819	3.20531	7	158824108	R	VIPR2	NM_003382	Body	chr7:158823178-158824316	Island			NA			LOC154822	BC041429
cg04270401	-0.257891	-7.17048	2.03093e-05	0.0104819	3.2028	10	102806871	F				chr10:102807774-102808271	N_Shore		RDMR	NA			KAZALD1	AK172864
cg24933709	-0.110412	-7.17026	2.0315e-05	0.0104819	3.20252	7	149120687	F				chr7:149119398-149120307	S_Shore			TRUE	7:149118982-149120716	Promoter_Associated	TRNA_Cys	.
cg06000144	-0.134944	-7.17007	2.03199e-05	0.0104819	3.20228	15	31599035	F								TRUE	15:31598895-31599102	Unclassified_Cell_type_specific	KLF13	NM_015995
cg22216643	-0.121064	-7.16997	2.03225e-05	0.0104819	3.20215	17	74704158	R	MXRA7;MXRA7;MXRA7	NM_001008528;NM_001008529;NM_198530	Body;Body;Body	chr17:74706465-74707067	N_Shelf			TRUE			MXRA7	NM_198530
cg13318241	-0.105108	-7.16439	2.04661e-05	0.0105288	3.19511	6	3455537	R	SLC22A23	NM_015482	Body	chr6:3456061-3457963	N_Shore		RDMR	TRUE			AK096549	AK096549
cg09477758	-0.0532847	-7.16436	2.0467e-05	0.0105288	3.19507	9	135116217	R	NTNG2	NM_032536	Body	chr9:135116147-135117929	Island			NA			NTNG2	NM_032536
cg15123573	-0.189325	-7.16244	2.05166e-05	0.0105288	3.19265	5	176827082	R				chr5:176827081-176827754	Island			NA			PFN3	NM_001029886
cg16990174	-0.152882	-7.16149	2.05414e-05	0.0105288	3.19145	3	72496875	F	RYBP	NM_012234	TSS1500	chr3:72495853-72496852	S_Shore			NA			RYBP	NM_012234
cg15006681	-0.147996	-7.16095	2.05552e-05	0.0105288	3.19078	22	38199759	R	H1F0	NM_005318	TSS1500	chr22:38200672-38201691	N_Shore		RDMR	TRUE			H1F0	NM_005318
cg25292638	-0.21665	-7.16055	2.05658e-05	0.0105288	3.19026	18	72917450	F	ZADH2	NM_175907	Body	chr18:72916107-72917233	S_Shore		CDMR	NA	18:72915995-72917644	Promoter_Associated_Cell_type_specific	ZADH2	AK302801
cg05045598	-0.111107	-7.15386	2.07403e-05	0.0105978	3.18182	1	6418521	F	ACOT7;ACOT7;ACOT7;ACOT7	NM_181864;NM_181865;NM_007274;NM_181866	Body;Body;Body;Body					NA	1:6418474-6418614	Unclassified_Cell_type_specific	ACOT7	NM_181866
cg20286956	-0.139093	-7.15304	2.07619e-05	0.0105978	3.18078	1	39547918	R	MACF1	NM_012090	5'UTR	chr1:39547013-39547959	Island		CDMR	NA	1:39546690-39548408	Unclassified_Cell_type_specific	MACF1	AK299010
cg10401489	-0.241126	-7.15245	2.07774e-05	0.0105978	3.18003	19	513241	F	C19orf20	NM_033513	Body				CDMR	NA			Mir_324	.
cg27207079	-0.17116	-7.14974	2.08486e-05	0.0106211	3.17661	9	123656751	R				chr9:123656750-123656972	Island			NA			PHF19	NM_001009936
cg09687907	-0.144974	-7.14278	2.10331e-05	0.0107019	3.16781	12	57915636	R	MBD6;DDIT3	NM_052897;NM_004083	TSS1500;TSS1500	chr12:57916322-57916810	N_Shore		RDMR	NA	12:57913637-57917461	Promoter_Associated	MBD6	NM_052897
cg00361017	-0.101067	-7.14122	2.10749e-05	0.01071	3.16583	6	166073666	R	PDE10A;PDE10A	NM_001130690;NM_006661	Body;5'UTR	chr6:166073882-166077752	N_Shore			NA			PDE10A	NM_001130690
cg09593860	-0.142075	-7.139	2.11342e-05	0.0107128	3.16302	11	113929287	F	ZBTB16	NM_006006	TSS1500	chr11:113929633-113932190	N_Shore			NA			ZBTB16	NM_006006
cg10213875	-0.288506	-7.13864	2.11438e-05	0.0107128	3.16257	7	48129814	F	UPP1;UPP1	NM_181597;NM_003364	5'UTR;5'UTR	chr7:48128727-48129961	Island		RDMR	NA	7:48128066-48129834	Promoter_Associated	UPP1	BC053592
cg01856887	-0.104414	-7.13811	2.11581e-05	0.0107128	3.16189	6	36812436	F				chr6:36807678-36808808	S_Shelf			NA			AK096023	AK096023
cg11617964	-0.249087	-7.13063	2.13595e-05	0.0108016	3.15242	6	32118399	R	PRRT1	NM_030651	Body	chr6:32118101-32118544	Island			NA			PRRT1	AK123424
cg13438032	-0.117863	-7.12847	2.14179e-05	0.0108179	3.14969	8	55162383	F								TRUE			MRPL15	NM_014175
cg25581090	-0.179979	-7.12475	2.15193e-05	0.0108316	3.14497	14	65009707	F	HSPA2;HSPA2	NM_021979;NM_021979	3'UTR;1stExon	chr14:65006874-65009197	S_Shore			NA			HSPA2	NM_021979
cg05527113	-0.0904317	-7.12469	2.15209e-05	0.0108316	3.1449	15	65204428	F	ANKDD1A	NM_182703	Body	chr15:65203730-65204392	S_Shore			TRUE	15:65203723-65204511	Unclassified	ANKDD1A	NM_182703
cg12582654	-0.139644	-7.1246	2.15235e-05	0.0108316	3.14478	7	128550812	F	KCP;KCP	NM_001135914;NM_199349	TSS200;TSS200	chr7:128550409-128550903	Island			NA	7:128550741-128551016	Unclassified_Cell_type_specific	KCP	NM_001135914
cg10502244	-0.109613	-7.12252	2.15803e-05	0.0108457	3.14214	12	48399295	R	COL2A1;COL2A1	NM_001844;NM_033150	TSS1500;TSS1500	chr12:48399168-48399372	Island			NA			COL2A1	NM_033150
cg05232215	-0.173214	-7.12166	2.16039e-05	0.0108457	3.14105	1	53393825	R	SCP2;SCP2	NM_001007098;NM_002979	Body;Body	chr1:53392880-53393645	S_Shore			NA	1:53392411-53393882	Promoter_Associated	SCP2	NM_002979
cg16137147	-0.201355	-7.11433	2.18056e-05	0.0109337	3.13176	1	221067896	R				chr1:221067447-221068185	Island			TRUE			HLX	NM_021958
cg05389174	-0.132747	-7.11224	2.18634e-05	0.0109495	3.12911	22	20192371	R	LOC150197	NR_026919	TSS1500					TRUE	22:20192150-20192498	Unclassified_Cell_type_specific	LOC284865	NR_038460
cg10866060	-0.165607	-7.11025	2.1919e-05	0.0109641	3.12658	12	83592588	R								TRUE			U6	.
cg26927427	-0.154594	-7.10756	2.19938e-05	0.0109835	3.12317	16	57832230	F	KIFC3;KIFC3;KIFC3	NM_001130099;NM_005550;NM_001130100	TSS1500;5'UTR;5'UTR	chr16:57835955-57836989	N_Shelf			NA			KIFC3	DQ426879
cg10816169	-0.109244	-7.10616	2.2033e-05	0.0109835	3.12139	11	66080868	R				chr11:66079092-66080920	Island			NA	11:66078582-66081394	Promoter_Associated	CD248	NM_020404
cg05965387	-0.182295	-7.10462	2.20762e-05	0.0109835	3.11943	13	51418053	R	DLEU7	NM_198989	TSS200	chr13:51417371-51418149	Island		RDMR	NA			DLEU7	NM_198989
cg17385483	-0.109554	-7.10426	2.20863e-05	0.0109835	3.11897	12	49734595	R				chr12:49735719-49736875	N_Shore		RDMR	TRUE			C1QL4	NM_001008223
cg24779381	-0.106903	-7.10342	2.211e-05	0.0109835	3.1179	15	74466794	R	ISLR;ISLR	NM_201526;NM_005545	TSS200;5'UTR	chr15:74467613-74467892	N_Shore			NA			ISLR	NM_201526
cg21692620	-0.184045	-7.10235	2.21399e-05	0.0109835	3.11655	17	40835849	F	CNTNAP1	NM_003632	Body	chr17:40835731-40836267	Island			NA	17:40835740-40835920	Unclassified	CNTNAP1	NM_003632
cg02566861	-0.145939	-7.10135	2.21681e-05	0.0109835	3.11528	17	46679516	R	LOC404266;LOC404266;LOC404266;LOC404266;HOXB6;LOC404266	NR_033203;NR_033205;NR_033204;NR_033201;NM_018952;NR_033202	Body;Body;Body;Body;5'UTR;Body	chr17:46675044-46675589	S_Shelf			NA	17:46679300-46680932	Unclassified	HOXB6	NM_018952
cg04337944	-0.0816894	-7.10128	2.21701e-05	0.0109835	3.11519	22	45899303	R	FBLN1;FBLN1;FBLN1;FBLN1	NM_006486;NM_006487;NM_001996;NM_006485	Body;Body;Body;Body	chr22:45898294-45899357	Island			NA			FBLN1	NM_006487
cg06430387	-0.126131	-7.09831	2.2254e-05	0.011012	3.11141	10	60094511	F	UBE2D1	NM_003338	TSS1500	chr10:60094731-60095306	N_Shore			NA	10:60094099-60095621	Promoter_Associated	UBE2D1	NM_001204880
cg20653375	-0.053164	-7.09694	2.22927e-05	0.011017	3.10967	13	99100778	F	FARP1	NM_005766	3'UTR					NA	13:99100224-99101973	Unclassified_Cell_type_specific	AF339817	AF339817
cg12845268	-0.209042	-7.09607	2.23175e-05	0.011017	3.10856	10	63657363	F								TRUE	10:63656264-63657713	Unclassified	ARID5B	NM_032199
cg03888223	-0.0751035	-7.09141	2.24501e-05	0.0110491	3.10264	13	51633010	R	GUCY1B2	NR_003923	Body					TRUE			GUCY1B2	NR_003923
cg17378342	-0.171932	-7.09128	2.24536e-05	0.0110491	3.10248	5	149546331	R	CDX1	NM_001804	TSS200	chr5:149546027-149546988	Island			TRUE	5:149546249-149546400	Unclassified_Cell_type_specific	CDX1	NM_001804
cg00049729	-0.155735	-7.08956	2.2503e-05	0.0110491	3.10029	5	55776345	R				chr5:55776604-55777233	N_Shore		CDMR	TRUE			U6atac	.
cg19894382	-0.0636122	-7.0886	2.25305e-05	0.0110491	3.09906	10	60086891	R								NA			UBE2D1	NM_001204880
cg03534375	-0.180413	-7.08812	2.25443e-05	0.0110491	3.09845	3	57743163	R	SLMAP	NM_007159	TSS200	chr3:57741925-57742990	S_Shore			NA			SLMAP	BC114627
cg24980413	-0.0995976	-7.08788	2.2551e-05	0.0110491	3.09815	5	346987	R	AHRR	NM_020731	Body	chr5:343449-344535	S_Shelf			NA			AHRR	AK314472
cg16652937	-0.123735	-7.08725	2.25692e-05	0.0110491	3.09735	3	23243625	R	UBE2E2	NM_152653	TSS1500	chr3:23244050-23245071	N_Shore			NA			UBE2E2	AK307075
cg00463502	-0.107388	-7.0827	2.27003e-05	0.0111002	3.09156	17	48912548	F	WFIKKN2	NM_175575	TSS200					TRUE			WFIKKN2	NM_175575
cg08224569	-0.0655776	-7.08128	2.27415e-05	0.0111072	3.08974	8	142369705	F	GPR20	NM_005293	5'UTR	chr8:142367050-142367860	S_Shore			TRUE	8:142369645-142369766	Unclassified_Cell_type_specific	GPR20	CCDS34949
cg15091747	-0.167089	-7.0784	2.28249e-05	0.0111348	3.08608	21	36262896	F	RUNX1	NM_001754	Body	chr21:36260450-36263687	Island			NA			RUNX1	NM_001001890
cg03325667	-0.102724	-7.07294	2.29842e-05	0.0111993	3.07913	10	43447292	R								NA			RET	NM_020975
cg08217910	-0.150487	-7.07037	2.30596e-05	0.0112147	3.07585	2	120188912	R	TMEM37	NM_183240	TSS1500	chr2:120189022-120189765	N_Shore			NA	2:120188889-120188982	Unclassified_Cell_type_specific	TMEM37	NM_183240
cg25929589	-0.116832	-7.07002	2.30699e-05	0.0112147	3.0754	2	24238867	F	MFSD2B	NM_001080473	Body					TRUE			MFSD2B	BC033385
cg05618807	-0.191476	-7.06858	2.31125e-05	0.0112209	3.07356	19	14376820	F				chr19:14376688-14376961	Island			NA			LPHN1	NM_001008701
cg01447828	-0.104907	-7.06775	2.31369e-05	0.0112209	3.0725	19	40919465	R	PRX;PRX	NM_181882;NM_020956	TSS200;TSS200					TRUE			PRX	NM_181882
cg22810790	-0.101093	-7.06406	2.3246e-05	0.0112606	3.0678	17	58236801	R	CA4	NM_000717	3'UTR					NA			CA4	AK298710
cg08090164	-0.172056	-7.06233	2.32972e-05	0.0112676	3.0656	8	143859709	F	LYNX1;LYNX1;LYNX1;LYNX1	NM_023946;NM_177476;NM_177457;NM_177477	TSS200;TSS1500;TSS200;TSS1500	chr8:143858279-143859411	S_Shore			NA			LYNX1	NM_023946
cg00115747	-0.107858	-7.06174	2.33148e-05	0.0112676	3.06484	17	74940026	F	MGAT5B;MGAT5B	NM_144677;NM_198955	Body;Body					TRUE			MGAT5B	BC063862
cg22965943	-0.152187	-7.06047	2.33528e-05	0.0112728	3.06321	5	68787919	R	OCLN	NM_002538	TSS200	chr5:68788151-68789823	N_Shore			NA			OCLN	NM_002538
cg12234455	-0.0721162	-7.05565	2.34969e-05	0.0113292	3.05706	19	49220235	F	MAMSTR;MAMSTR	NM_182574;NM_001130915	TSS200;Body	chr19:49223054-49223312	N_Shelf			NA			MAMSTR	NM_182574
cg03289906	-0.0871398	-7.05455	2.35297e-05	0.0113318	3.05566	7	94538408	F	PPP1R9A;PPP1R9A;PPP1R9A;PPP1R9A;PPP1R9A	NM_001166161;NM_001166160;NM_001166163;NM_001166162;NM_017650	TSS1500;5'UTR;TSS1500;TSS1500;5'UTR	chr7:94536849-94537477	S_Shore			NA			PPP1R9A	NM_001166163
cg13102294	-0.1692	-7.05085	2.36412e-05	0.0113723	3.05093	6	32121393	R	PPT2;PPT2;PPT2	NM_005155;NM_138717;NM_138717	TSS1500;1stExon;5'UTR	chr6:32121829-32122529	N_Shore			NA	6:32120376-32123743	Promoter_Associated	PPT2	NM_138717
cg18121224	-0.292446	-7.04904	2.3696e-05	0.0113854	3.04862	5	176559563	R	NSD1;NSD1	NM_022455;NM_172349	TSS1500;TSS1500	chr5:176558852-176561652	Island			NA			NSD1	NM_172349
cg03329019	-0.11195	-7.0434	2.38673e-05	0.0114544	3.04141	1	221051117	R				chr1:221051966-221053673	N_Shore		RDMR	NA			HLX	NM_021958
cg27646484	-0.06195	-7.0377	2.40419e-05	0.0115249	3.03412	16	31210736	F				chr16:31213566-31214287	N_Shelf			NA			PYCARD	NM_145182
cg00239563	-0.120599	-7.0365	2.40787e-05	0.0115291	3.03259	4	81128029	F				chr4:81128229-81128691	N_Shore		RDMR	NA			PRDM8	NM_001099403
cg00156995	-0.141948	-7.03318	2.41814e-05	0.0115577	3.02833	13	41055588	F	LOC646982;LOC646982;LOC646982	NR_024505;NR_024507;NR_024506	TSS1500;TSS1500;TSS1500					NA			TTL	NR_024507
cg20951444	-0.0974827	-7.03221	2.42112e-05	0.0115577	3.0271	1	33337112	R	FNDC5	NM_153756	TSS1500					TRUE			FNDC5	NM_001171940
cg13808012	-0.121862	-7.03161	2.42299e-05	0.0115577	3.02632	1	244094935	F				chr1:244094755-244095117	Island			NA			LOC339529	NR_033883
cg22778981	-0.124131	-7.03096	2.42499e-05	0.0115577	3.0255	17	37856133	R	ERBB2;ERBB2	NM_001005862;NM_004448	5'UTR;TSS200	chr17:37856448-37856891	N_Shore			NA			ERBB2	AK300321
cg17611235	-0.251403	-7.02945	2.42971e-05	0.0115602	3.02355	11	1991188	R				chr11:1990899-1991211	Island			NA	11:1990855-1991242	Unclassified_Cell_type_specific	AK126380	AK126380
cg19513876	-0.0827623	-7.029	2.4311e-05	0.0115602	3.02298	17	17377803	F				chr17:17380175-17380416	N_Shelf			NA			MED9	NM_018019
cg16044109	-0.156209	-7.02289	2.45018e-05	0.0116376	3.01516	3	124762597	F	HEG1	NM_020733	Body					TRUE			HEG1	AB384586
cg13504055	-0.163445	-7.02141	2.45483e-05	0.0116463	3.01326	2	102234418	F								TRUE			MAP4K4	AY834276
cg14846292	-0.105975	-7.019	2.46243e-05	0.011669	3.01017	12	49726500	F	C1QL4	NM_001008223	3'UTR	chr12:49726591-49727114	N_Shore			NA	12:49724962-49726611	Gene_Associated	C1QL4	NM_001008223
cg24439713	-0.155379	-7.01759	2.46686e-05	0.0116766	3.00837	1	86081713	R				chr1:86081700-86082068	Island			NA			AL832891	AL832891
cg21193577	-0.100001	-7.01605	2.47174e-05	0.011685	3.00639	14	101036322	F	BEGAIN	NM_020836	TSS200	chr14:101033876-101035229	S_Shore			NA			BEGAIN	NM_020836
cg13308964	-0.138792	-7.01525	2.47427e-05	0.011685	3.00537	17	69029659	F								TRUE			BC039327	BC039327
cg14348967	-0.0772412	-7.00972	2.49188e-05	0.0117362	2.99827	4	10160060	R								TRUE	4:10159209-10160480	Unclassified	DQ599898	DQ599898
cg24030449	-0.0792686	-7.00912	2.49379e-05	0.0117362	2.9975	8	16859671	R	FGF20;FGF20	NM_019851;NM_019851	1stExon;5'UTR	chr8:16859044-16859452	S_Shore		RDMR	NA	8:16859616-16860165	Unclassified_Cell_type_specific	FGF20	BC141979
cg06766016	-0.175709	-7.00836	2.49624e-05	0.0117362	2.99652	1	45278971	R	BTBD19	NM_001136537	Body	chr1:45278765-45279644	Island			NA	1:45278964-45279885	Promoter_Associated	BTBD19	AK304611
cg00040575	-0.0887445	-7.0083	2.49644e-05	0.0117362	2.99644	22	18506180	R	MICAL3;MICAL3;MICAL3	NM_001122731;NM_015241;NM_001136004	5'UTR;5'UTR;5'UTR	chr22:18506419-18507412	N_Shore			NA			MICAL3	AK295978
cg03520644	-0.125367	-7.00704	2.50047e-05	0.0117418	2.99482	1	103574523	F	COL11A1;COL11A1;COL11A1;COL11A1	NM_001168249;NM_080629;NM_080630;NM_001854	TSS1500;TSS1500;TSS1500;TSS1500					TRUE			COL11A1	NM_080629
cg25428553	-0.167205	-7.00487	2.50744e-05	0.0117536	2.99204	2	105275706	R				chr2:105275588-105275940	Island			NA			LOC284998	AX746619
cg01481251	-0.0771602	-7.00405	2.51006e-05	0.0117536	2.99099	11	32912719	R				chr11:32913989-32915514	N_Shore		RDMR	NA	11:32912572-32912770	Unclassified_Cell_type_specific	QSER1	NM_001076786
cg04638150	-0.210675	-7.0035	2.51185e-05	0.0117536	2.99028	11	62273418	F	AHNAK	NM_024060	Body					TRUE			AHNAK	NM_001620
cg13939055	-0.132441	-7.00273	2.51433e-05	0.0117536	2.98929	1	244094869	R				chr1:244094755-244095117	Island			NA			LOC339529	NR_033883
cg26773791	-0.162071	-7.00131	2.51892e-05	0.0117617	2.98747	11	94883242	R				chr11:94883335-94883565	N_Shore		RDMR	TRUE			AK055250	AK055250
cg04749507	-0.0721453	-6.9991	2.52607e-05	0.0117818	2.98463	6	32120203	F	PPT2;PRRT1;PPT2	NM_005155;NM_030651;NM_138717	TSS1500;TSS1500;TSS1500	chr6:32121829-32122529	N_Shore			TRUE	6:32120138-32120285	Unclassified_Cell_type_specific	PRRT1	NM_030651
cg03287111	-0.132248	-6.99444	2.54123e-05	0.01183	2.97864	2	121625634	F	GLI2	NM_005270	Body	chr2:121624827-121625209	S_Shore			TRUE			GLI2	BC111410
cg00864684	-0.118709	-6.99417	2.54211e-05	0.01183	2.97829	10	125825166	R								TRUE			CHST15	NM_014863
cg24378227	-0.153169	-6.99234	2.54807e-05	0.0118444	2.97595	6	1396771	F				chr6:1393049-1394170	S_Shelf		RDMR	NA	6:1396621-1397573	Unclassified	FOXF2	NM_001452
cg23349301	-0.14394	-6.98862	2.5603e-05	0.011888	2.97115	17	46697115	R				chr17:46697413-46697701	N_Shore		RDMR	TRUE	17:46695336-46697236	Unclassified	HOXB8	NM_024016
cg15903837	0.0558978	6.9874	2.56431e-05	0.0118932	2.96959	11	72974996	F	P2RY6;P2RY6	NM_176796;NM_176797	TSS1500;TSS1500	chr11:72975469-72975797	N_Shore			NA			P2RY6	NM_176797
cg02952809	-0.133193	-6.98558	2.57032e-05	0.0119078	2.96724	7	128094710	R	C7orf68;C7orf68	NM_001098786;NM_013332	TSS1500;TSS1500	chr7:128095678-128096197	N_Shore			NA			HILPDA	NM_001098786
cg06117153	-0.0662707	-6.98413	2.57512e-05	0.0119157	2.96538	16	85203932	F				chr16:85203157-85203941	Island		DMR	NA			LOC400548	NR_033984
cg02703145	-0.135391	-6.98246	2.58065e-05	0.0119157	2.96323	9	93922525	F				chr9:93922196-93922679	Island			NA			AK095132	AK095132
cg09772299	-0.134218	-6.98245	2.58066e-05	0.0119157	2.96323	2	136783103	F								TRUE			DARS	CR749809
cg00615592	-0.14504	-6.98022	2.58808e-05	0.0119366	2.96035	6	158937125	R				chr6:158937285-158937491	N_Shore			NA			TMEM181	NM_020823
cg08802933	-0.108443	-6.9793	2.59116e-05	0.0119375	2.95916	2	219282528	F	VIL1	NM_007127	TSS1500					NA			VIL1	AK300965
cg01952185	-0.137756	-6.97774	2.59635e-05	0.0119482	2.95715	5	134813213	R								NA			TIFAB	NM_001099221
cg25299676	-0.0762554	-6.97584	2.6027e-05	0.0119549	2.95471	7	116312739	R	MET;MET	NM_000245;NM_001127500	5'UTR;5'UTR	chr7:116311824-116312598	S_Shore			NA			MET	NM_001127500
cg13558810	-0.136164	-6.97557	2.60359e-05	0.0119549	2.95437	1	36038708	F	TFAP2E	NM_178548	TSS1500	chr1:36038927-36040051	N_Shore			NA	1:36038329-36039236	Unclassified_Cell_type_specific	TFAP2E	NM_178548
cg24119717	-0.123142	-6.96877	2.62649e-05	0.0120467	2.9456	5	139488731	R				chr5:139486931-139487672	S_Shore		RDMR	NA			DJ031132	DJ031132
cg10708898	-0.129023	-6.96615	2.63535e-05	0.0120587	2.94223	1	35309303	R								TRUE			C1orf212	CCDS53295
cg13347910	-0.168614	-6.96422	2.64193e-05	0.0120587	2.93973	6	10555853	R	GCNT2;GCNT2	NM_001491;NM_145649	TSS200;Body					TRUE			GCNT2	NM_001491
cg10512203	-0.159082	-6.96318	2.64545e-05	0.0120587	2.9384	1	40780905	R	COL9A2	NM_001852	Body	chr1:40781004-40781445	N_Shore			TRUE	1:40780439-40781826	Promoter_Associated	COL9A2	NM_001852
cg17149103	-0.167837	-6.96299	2.64611e-05	0.0120587	2.93815	1	147789480	F				chr1:147789652-147790094	N_Shore		RDMR	NA			TRNA_Pseudo	.
cg27475169	-0.137276	-6.96293	2.64632e-05	0.0120587	2.93807	11	119190850	F				chr11:119191535-119192182	N_Shore			TRUE	11:119190807-119192692	Unclassified	MCAM	NM_006500
cg11327857	-0.131712	-6.962	2.64949e-05	0.0120587	2.93687	4	123747558	F	FGF2	NM_002006	TSS1500	chr4:123747740-123748980	N_Shore			NA			FGF2	NM_002006
cg26034919	-0.139345	-6.96127	2.65198e-05	0.0120587	2.93593	2	27665711	R	KRTCAP3;KRTCAP3	NM_001168364;NM_173853	Body;Body	chr2:27664939-27665151	S_Shore			NA			KRTCAP3	AY358993
cg20430773	-0.210782	-6.9596	2.65768e-05	0.0120587	2.93378	1	16534157	F	ARHGEF19	NM_153213	Body	chr1:16532917-16534580	Island			NA	1:16532722-16534260	Promoter_Associated	ARHGEF19	AL137736
cg06814654	-0.0970358	-6.95954	2.6579e-05	0.0120587	2.9337	14	54829779	F								TRUE			CDKN3	NM_001130851
cg05168015	-0.180935	-6.95944	2.65822e-05	0.0120587	2.93357	5	171880461	F	SH3PXD2B	NM_001017995	Body	chr5:171881182-171881547	N_Shore			NA			SH3PXD2B	AK128871
cg03610228	-0.164125	-6.95715	2.66609e-05	0.0120708	2.93061	10	21799395	R				chr10:21797632-21799341	S_Shore			TRUE	10:21798692-21800030	Unclassified_Cell_type_specific	AK055656	AK055656
cg17533927	-0.151333	-6.95622	2.66929e-05	0.0120708	2.92941	7	128550898	F	KCP;KCP	NM_001135914;NM_199349	TSS200;TSS200	chr7:128550409-128550903	Island			NA	7:128550741-128551016	Unclassified_Cell_type_specific	KCP	NM_001135914
cg23669081	-0.478408	-6.95612	2.66962e-05	0.0120708	2.92929	17	46685353	R	HOXB7	NM_004502	Body	chr17:46685244-46685449	Island			NA			HOXB6	AK292200
cg07871442	-0.137628	-6.95452	2.67513e-05	0.0120825	2.92722	5	171057196	R				chr5:171057071-171057340	Island			TRUE	5:171056486-171058001	Unclassified_Cell_type_specific	FGF18	NM_003862
cg19127638	-0.2162	-6.95186	2.68433e-05	0.0121108	2.92379	10	70322442	R	TET1	NM_030625	5'UTR	chr10:70320130-70320822	S_Shore		CDMR	NA			TET1	NM_030625
cg24261333	-0.146597	-6.9503	2.68973e-05	0.012122	2.92177	11	73357019	F	PLEKHB1;PLEKHB1	NM_021200;NM_001130033	TSS1500;TSS1500				RDMR	NA			PLEKHB1	NM_001130033
cg08855938	-0.137933	-6.9461	2.70436e-05	0.0121747	2.91634	1	214398483	R								TRUE			SMYD2	BC098305
cg26175343	-0.111327	-6.944	2.71167e-05	0.012187	2.91364	20	6034888	F	LRRN4	NM_152611	TSS200	chr20:6032675-6033517	S_Shore			NA			LRRN4	AK172833
cg05134847	-0.113694	-6.94363	2.71298e-05	0.012187	2.91315	22	19742426	R				chr22:19742901-19744729	N_Shore			NA			TBX1	NM_005992
cg12000995	-0.242567	-6.94138	2.72087e-05	0.0122092	2.91024	2	27665139	R	KRTCAP3;KRTCAP3	NM_001168364;NM_173853	TSS200;TSS200	chr2:27664939-27665151	Island			NA	2:27664962-27665570	Promoter_Associated	KRTCAP3	NM_001168364
cg01394847	-0.255204	-6.93906	2.72903e-05	0.0122326	2.90724	16	73101069	R				chr16:73099812-73100791	S_Shore		RDMR	NA			ZFHX3	NM_001164766
cg25845985	-0.173997	-6.93646	2.7382e-05	0.0122533	2.90388	6	32118405	R	PRRT1	NM_030651	Body	chr6:32118101-32118544	Island			NA			PRRT1	AK123424
cg00582562	-0.130676	-6.93607	2.73957e-05	0.0122533	2.90338	17	46388465	R	SKAP1;SKAP1	NM_003726;NM_001075099	Body;Body					NA			SKAP1	AK290818
cg04013159	-0.0685131	-6.93417	2.7463e-05	0.0122585	2.90092	20	62285926	R	STMN3	NM_015894	TSS1500	chr20:62283516-62284835	S_Shore			NA	20:62285751-62286053	Unclassified_Cell_type_specific	STMN3	NM_015894
cg23579062	-0.0985189	-6.93355	2.74851e-05	0.0122585	2.90012	9	34457500	R	C9orf25;DNAI1	NM_147202;NM_012144	Body;TSS1500	chr9:34457375-34458892	Island			NA			C9orf25	AK123887
cg08571918	-0.142418	-6.93324	2.74961e-05	0.0122585	2.89972	2	105275920	F				chr2:105275588-105275940	Island			NA			LOC284998	AX746619
cg14315430	-0.192298	-6.9312	2.75685e-05	0.0122775	2.89708	12	57915618	R	MBD6;DDIT3	NM_052897;NM_004083	TSS1500;TSS1500	chr12:57916322-57916810	N_Shore		RDMR	NA	12:57913637-57917461	Promoter_Associated	MBD6	NM_052897
cg15194163	-0.120118	-6.92674	2.77281e-05	0.0123354	2.8913	6	32118213	R	PRRT1	NM_030651	Body	chr6:32118101-32118544	Island			NA			PRRT1	AK123424
cg10755899	-0.193523	-6.92474	2.77997e-05	0.0123539	2.88872	4	1772151	R				chr4:1772006-1772265	Island			NA			FGFR3	AB209441
cg19851563	-0.178362	-6.92384	2.78321e-05	0.0123551	2.88755	19	2546844	R	GNG7	NM_052847	5'UTR	chr19:2546620-2546983	Island			NA			GADD45B	AY615270
cg19414967	-0.155896	-6.91914	2.80019e-05	0.0124172	2.88146	8	49468296	F				chr8:49468683-49468959	N_Shore		RDMR	TRUE			EFCAB1	NR_024605
cg26117521	-0.0882923	-6.91685	2.8085e-05	0.0124407	2.87849	5	158460303	R	EBF1	NM_024007	Body					TRUE			EBF1	AK303698
cg06636541	-0.226144	-6.91496	2.81536e-05	0.0124577	2.87604	17	79374515	R	BAHCC1	NM_001080519	Body	chr17:79366806-79374742	Island		DMR	NA			MIR4740	NR_039894
cg18804667	-0.139224	-6.9136	2.82033e-05	0.0124664	2.87428	5	58883392	F	PDE4D;PDE4D;PDE4D	NM_001165899;NM_006203;NM_001104631	Body;TSS1500;Body			low-CpG:58919135-58919242		TRUE			PDE4D	NM_006203
cg12292060	-0.111225	-6.91071	2.8309e-05	0.0124886	2.87053	6	29597991	F	GABBR1;GABBR1	NM_021904;NM_001470	Body;Body	chr6:29600192-29600661	N_Shelf			NA			GABBR1	NM_021903
cg00054210	-0.215797	-6.91057	2.83139e-05	0.0124886	2.87035	8	65711644	R	CYP7B1	NM_004820	TSS1500	chr8:65710990-65711722	Island			NA			CYP7B1	NM_004820
cg01323777	-0.249845	-6.90956	2.83512e-05	0.0124918	2.86904	17	7832943	R	KCNAB3	NM_004732	TSS200	chr17:7832532-7833164	Island			NA			KCNAB3	BC096233
cg00594129	-0.129302	-6.90658	2.84608e-05	0.0125268	2.86517	5	158524270	F	EBF1	NM_024007	Body	chr5:158523906-158524598	Island		CDMR	TRUE	5:158524174-158525813	Unclassified	EBF1	AK303698
cg14918082	-0.300553	-6.9051	2.85151e-05	0.0125373	2.86326	17	7833237	F	KCNAB3	NM_004732	TSS1500	chr17:7835171-7835569	N_Shore			NA	17:7833067-7833374	Unclassified_Cell_type_specific	KCNAB3	BC096233
cg00191853	-0.116258	-6.90397	2.85571e-05	0.0125425	2.86179	8	101177733	R	SPAG1;SPAG1	NM_003114;NM_172218	Body;Body					NA			SPAG1	NM_003114
cg19401033	-0.19488	-6.90057	2.8683e-05	0.0125767	2.85738	3	107148372	F				chr3:107149820-107150910	N_Shore			NA	3:107148351-107149607	Unclassified	BC042024	BC042024
cg06114987	-0.121485	-6.90023	2.86957e-05	0.0125767	2.85693	16	86611714	R	FOXL1	NM_005250	TSS1500	chr16:86612188-86613821	N_Shore		RDMR	TRUE			FOXL1	NM_005250
cg03284879	-0.164937	-6.89682	2.88229e-05	0.012619	2.8525	3	193894498	F								TRUE			HES1	NM_005524
cg19584547	-0.140883	-6.89497	2.8892e-05	0.012636	2.8501	11	68920676	R								TRUE			BC064339	BC064339
cg00994804	-0.302969	-6.89172	2.90139e-05	0.0126743	2.84588	21	36259383	R	RUNX1;RUNX1;RUNX1	NM_001001890;NM_001122607;NM_001754	1stExon;1stExon;Body	chr21:36258952-36259472	Island			TRUE			RUNX1	NM_001122607
cg16302655	-0.0871488	-6.89101	2.90409e-05	0.0126743	2.84495	11	113185879	F	TTC12	NM_017868	5'UTR	chr11:113185332-113185663	S_Shore			NA	11:113184831-113186202	Promoter_Associated	TTC12	AK091887
cg22547559	-0.0967804	-6.88818	2.91475e-05	0.0126947	2.84128	5	125929611	R	ALDH7A1	NM_001182	Body	chr5:125930601-125931049	N_Shore		CDMR	NA			ALDH7A1	NM_001202404
cg00964751	-0.122446	-6.88814	2.9149e-05	0.0126947	2.84123	17	36828900	F	C17orf96;C17orf96	NM_001130677;NM_001130677	1stExon;3'UTR	chr17:36829692-36831500	N_Shore		RDMR	NA			C17orf96	NM_001130677
cg19821872	-0.105881	-6.88733	2.91796e-05	0.0126947	2.84017	2	240667798	R								NA			LOC150935	NR_037808
cg04848686	-0.0827732	-6.8864	2.92151e-05	0.0126968	2.83896	16	88747591	R	MGC23284;SNAI3	NR_024399;NM_178310	Body;Body	chr16:88747747-88748018	N_Shore			NA	16:88747518-88748794	Promoter_Associated	SNAI3	NM_178310
cg21136371	-0.0856608	-6.88391	2.93094e-05	0.0127244	2.83573	11	1991065	F				chr11:1990899-1991211	Island			NA	11:1990855-1991242	Unclassified_Cell_type_specific	AK126380	AK126380
cg17493885	-0.264462	-6.88139	2.94054e-05	0.0127527	2.83245	5	176559558	R	NSD1;NSD1	NM_022455;NM_172349	TSS1500;TSS1500	chr5:176558852-176561652	Island			NA			NSD1	NM_172349
cg17696731	-0.0986039	-6.88039	2.94436e-05	0.012756	2.83115	3	13060971	F	IQSEC1	NM_001134382	Body			low-CpG:13035893-13035988		TRUE			IQSEC1	BC010267
cg13847322	-0.163156	-6.87494	2.96529e-05	0.012824	2.82405	9	137272766	F	RXRA	NM_002957	Body					TRUE			MIR4669	NR_039816
cg02153814	-0.2637	-6.87468	2.96626e-05	0.012824	2.82372	3	194014525	F				chr3:194014480-194014983	Island			NA			LOC100131551	NR_024480
cg07839313	-0.121495	-6.87066	2.9818e-05	0.0128778	2.81848	19	17514600	R	BST2	NM_004335	Body					NA	19:17513915-17514642	Unclassified_Cell_type_specific	BST2	NM_004335
cg10143507	-0.0958942	-6.8688	2.98905e-05	0.0128834	2.81605	2	118943004	F				chr2:118943823-118944199	N_Shore			TRUE	2:118942789-118944592	Promoter_Associated	Mir_544	.
cg16261676	-0.118115	-6.86868	2.98948e-05	0.0128834	2.8159	10	80446507	F								TRUE			AX747983	AX747983
cg15645660	-0.149309	-6.86754	2.99394e-05	0.0128834	2.81441	1	55247356	F	TTC22	NM_001114108	Body	chr1:55246742-55247519	Island			TRUE			PARS2	NM_152268
cg13985132	-0.108373	-6.86712	2.99555e-05	0.0128834	2.81387	15	65394414	R	LOC390595	NM_001163692	Body	chr15:65394413-65395041	Island			TRUE	15:65393270-65394431	Unclassified	UBAP1L	BC127917
cg14699112	-0.0938672	-6.864	3.00775e-05	0.0129225	2.80979	4	141170338	F				chr4:141173834-141174567	N_Shelf			NA			SCOC	NM_032547
cg26010218	-0.127768	-6.86182	3.01629e-05	0.0129458	2.80695	4	78977223	R	FRAS1;FRAS1	NM_025074;NM_001166133	TSS1500;TSS1500	chr4:78978365-78979256	N_Shore			NA			FRAS1	NM_025074
cg09052626	-0.11953	-6.85632	3.03794e-05	0.0130252	2.79978	16	86603583	R				chr16:86599355-86602649	S_Shore		RDMR	NA			FOXC2	NM_005251
cg07037725	-0.129553	-6.85194	3.05531e-05	0.0130861	2.79406	5	141699580	F	SPRY4;SPRY4	NM_030964;NM_001127496	5'UTR;5'UTR					TRUE			SPRY4	CCDS47296
cg10322443	-0.178646	-6.84991	3.06338e-05	0.0131071	2.79142	14	65722585	R								TRUE			BX161428	BX161428
cg22833618	-0.0406631	-6.84612	3.07855e-05	0.0131584	2.78647	19	49658548	R	HRC;HRC	NM_002152;NM_002152	5'UTR;1stExon	chr19:49660880-49661157	N_Shelf			NA			HRC	NM_002152
cg17768691	-0.129353	-6.84183	3.09581e-05	0.0132084	2.78086	12	14720948	F	PLBD1	NM_024829	TSS200	chr12:14720248-14721093	Island			NA			PLBD1	NM_024829
cg06108383	-0.129466	-6.84162	3.09663e-05	0.0132084	2.78059	6	32120899	R	PPT2;PRRT1;PPT2	NM_005155;NM_030651;NM_138717	TSS1500;TSS1500;TSS1500	chr6:32121829-32122529	N_Shore			TRUE	6:32120376-32123743	Promoter_Associated	PRRT1	BC013201
cg22128896	-0.143382	-6.84083	3.09984e-05	0.0132085	2.77955	11	33087476	R	TCP11L1;TCP11L1	NM_001145541;NM_018393	Body;Body					NA	11:33087109-33087477	Unclassified_Cell_type_specific	TCP11L1	AK021448
cg26422656	-0.0744867	-6.83981	3.10396e-05	0.0132125	2.77822	2	238585054	R	LRRFIP1	NM_001137550	Body					TRUE			LRRFIP1	NM_001137551
cg21212881	-0.141071	-6.83589	3.11987e-05	0.0132666	2.7731	9	14344359	F				chr9:14346265-14348149	N_Shore			TRUE			NFIB	NM_001190737
cg24574963	-0.218491	-6.83337	3.13013e-05	0.0132965	2.7698	7	149120622	R				chr7:149119398-149120307	S_Shore			TRUE	7:149118982-149120716	Promoter_Associated	TRNA_Cys	.
cg12405265	-0.170665	-6.8295	3.14597e-05	0.0133501	2.76474	1	24655961	R	GRHL3;GRHL3;GRHL3	NM_198173;NM_198174;NM_021180	Body;5'UTR;Body					TRUE			GRHL3	NM_021180
cg23218354	-0.300631	-6.82822	3.15125e-05	0.0133588	2.76306	1	2885244	R				chr1:2885062-2885284	Island			NA			ACTRT2	NM_080431
cg20201270	-0.188495	-6.82608	3.16006e-05	0.0133701	2.76026	2	45397874	F				chr2:45395869-45398186	Island		CDMR	NA			UNQ6975	AK095550
cg08005165	-0.151751	-6.826	3.16035e-05	0.0133701	2.76017	8	55380663	F				chr8:55382639-55383189	N_Shore			NA			SOX17	NM_022454
cg19390244	-0.122728	-6.82328	3.17161e-05	0.0133923	2.7566	7	132300084	F	PLXNA4	NM_181775	5'UTR					TRUE			PLXNA4	NM_181775
cg19593741	-0.199247	-6.82317	3.17207e-05	0.0133923	2.75646	6	31734217	F	C6orf27	NM_025258	Body					NA			SAPCD1	AL122094
cg13943068	-0.243705	-6.82205	3.17669e-05	0.0133981	2.75499	4	1580193	R				chr4:1580050-1580455	Island			NA			AX748388	AX748388
cg24727290	-0.0751436	-6.81866	3.1908e-05	0.0134439	2.75055	6	30850868	R	DDR1;DDR1	NM_001954;NM_013993	TSS1500;TSS1500	chr6:30852102-30852676	N_Shore			TRUE			DDR1	AK291621
cg02903680	-0.15218	-6.81614	3.20133e-05	0.0134689	2.74725	15	85526198	F	PDE8A;PDE8A	NM_173454;NM_002605	Body;Body	chr15:85523512-85525865	S_Shore			NA			PDE8A	AF388187
cg27203184	-0.107139	-6.81568	3.20323e-05	0.0134689	2.74665	7	100081966	R	C7orf51	NM_173564	5'UTR	chr7:100080693-100081371	S_Shore			NA			NYAP1	NM_173564
cg17641566	-0.116521	-6.81478	3.20701e-05	0.0134711	2.74547	10	73565966	R	CDH23	NM_022124	Body	chr10:73565569-73565827	S_Shore			TRUE	10:73565872-73565969	Unclassified_Cell_type_specific	CDH23	NM_001171936
cg06640630	-0.191588	-6.81375	3.21133e-05	0.0134756	2.74412	1	211652276	R	RD3;RD3	NM_183059;NM_001164688	3'UTR;3'UTR	chr1:211652306-211652754	N_Shore			NA	1:211652181-211652335	Unclassified_Cell_type_specific	RD3	BC035651
cg19782271	-0.174466	-6.80959	3.22884e-05	0.0135345	2.73866	5	171616253	F	STK10	NM_005990	TSS1500	chr5:171614430-171615939	S_Shore		RDMR	NA	5:171615117-171616622	Promoter_Associated	STK10	NM_005990
cg23948843	-0.182748	-6.8073	3.23852e-05	0.0135345	2.73566	2	164204752	R				chr2:164204740-164205039	Island			TRUE			FIGN	NM_018086
cg24404630	-0.134191	-6.80691	3.24016e-05	0.0135345	2.73515	18	13611824	F	C18orf1;C18orf1;C18orf1;C18orf1;C18orf1;C18orf1	NM_001003675;NM_181481;NM_181482;NM_001003674;NM_001003675;NM_001003674	5'UTR;Body;Body;5'UTR;1stExon;1stExon					TRUE	18:13611793-13612979	Promoter_Associated	C18orf1	AK291574
cg13305444	-0.119253	-6.80656	3.24165e-05	0.0135345	2.73469	1	225838196	R	ENAH;ENAH	NM_001008493;NM_018212	Body;Body	chr1:225840270-225841795	N_Shelf			NA			ENAH	NM_018212
cg08199758	-0.199674	-6.80605	3.2438e-05	0.0135345	2.73403	16	3062426	R	CLDN9	NM_020982	TSS200	chr16:3063679-3063981	N_Shore		DMR	NA			CLDN9	NM_020982
cg20102877	-0.166817	-6.80578	3.24497e-05	0.0135345	2.73366	2	27665638	R	KRTCAP3;KRTCAP3	NM_001168364;NM_173853	Body;Body	chr2:27665251-27665670	Island			NA			KRTCAP3	AY358993
cg15196156	-0.172129	-6.80388	3.25305e-05	0.0135522	2.73117	1	40388395	R								NA	1:40388304-40388422	Unclassified_Cell_type_specific	MYCL1	NM_001033081
cg26644853	-0.158983	-6.80324	3.25576e-05	0.0135522	2.73034	16	57406257	F	CX3CL1	NM_002996	TSS200					NA			CX3CL1	NM_002996
cg09386376	-0.139827	-6.79984	3.27025e-05	0.0135988	2.72588	11	638939	R	DRD4	NM_000797	Body	chr11:636906-640628	Island			NA			DRD4	NM_000797
cg15789095	-0.133553	-6.79871	3.2751e-05	0.0136054	2.72439	1	32281466	F	SPOCD1	NM_144569	5'UTR					NA	1:32281240-32281900	Unclassified	SPOCD1	AX746730
cg18449062	-0.083064	-6.79651	3.28455e-05	0.0136308	2.7215	10	104679468	R	CNNM2;CNNM2;CNNM2	NM_199077;NM_199076;NM_017649	1stExon;1stExon;1stExon	chr10:104677315-104679312	S_Shore		RDMR	NA			CNNM2	NM_199077
cg22374525	-0.0883017	-6.79575	3.28781e-05	0.0136308	2.72051	1	116370764	F				chr1:116370810-116371303	N_Shore			NA			NHLH2	CCDS885
cg00405069	-0.0907316	-6.7949	3.29147e-05	0.0136323	2.71939	1	52455390	R	RAB3B	NM_002867	5'UTR	chr1:52455970-52456453	N_Shore			NA			RAB3B	NM_002867
cg08785317	-0.10338	-6.79127	3.30716e-05	0.0136836	2.71462	16	86604854	R				chr16:86599355-86602649	S_Shelf		RDMR	NA			FOXC2	NM_005251
cg23450038	-0.188416	-6.78861	3.3187e-05	0.0137085	2.71113	19	2462961	F				chr19:2462064-2462442	S_Shore			NA			LMNB2	NM_032737
cg04942251	-0.237942	-6.78836	3.31979e-05	0.0137085	2.7108	11	63687247	F				chr11:63685489-63685968	S_Shore			NA			RCOR2	NM_173587
cg10547387	-0.0982989	-6.78511	3.33393e-05	0.0137385	2.70653	15	55987268	R	PRTG	NM_173814	Body					TRUE			PRTG	BC073967
cg08817693	-0.126021	-6.78444	3.33688e-05	0.0137385	2.70564	12	107348944	F	C12orf23	NM_152261	TSS1500	chr12:107349152-107350089	N_Shore			NA			AK055712	AK055712
cg06804344	-0.188086	-6.78434	3.33733e-05	0.0137385	2.70551	3	128778699	F	GP9	NM_000174	TSS1500					NA			GP9	NM_000174
cg19395706	-0.082877	-6.78365	3.34032e-05	0.0137385	2.70461	11	64412079	R	NRXN2;NRXN2;NRXN2	NM_138734;NM_138732;NM_015080	TSS1500;Body;Body	chr11:64409877-64411253	S_Shore			TRUE	11:64412054-64412527	Unclassified_Cell_type_specific	NRXN2	NM_138734
cg15013527	-0.299707	-6.78129	3.35068e-05	0.0137674	2.7015	11	316339	R				chr11:315739-316539	Island			NA	11:316185-316760	Unclassified_Cell_type_specific	BC040735	BC040735
cg17840501	-0.11802	-6.77945	3.35878e-05	0.013787	2.69908	17	75385086	F	SEPT9;SEPT9;SEPT9;SEPT9;SEPT9	NM_001113494;NM_001113492;NM_001113493;NM_001113491;NM_006640	5'UTR;5'UTR;Body;Body;Body					TRUE			MIR4316	NR_036200
cg15371815	-0.14713	-6.77696	3.36976e-05	0.0138184	2.69581	2	36582144	F	CRIM1	NM_016441	TSS1500	chr2:36582397-36584260	N_Shore			NA	2:36582088-36582229	Unclassified_Cell_type_specific	LOC100288911	NR_037631
cg20400592	-0.190185	-6.77553	3.37608e-05	0.0138306	2.69392	13	51418041	R	DLEU7	NM_198989	TSS200	chr13:51417371-51418149	Island		RDMR	NA			DLEU7	NM_198989
cg25614875	-0.200695	-6.77344	3.38534e-05	0.013845	2.69118	1	217263847	F	ESRRG;ESRRG;ESRRG	NM_206594;NM_206595;NM_001134285	TSS1500;TSS1500;5'UTR	chr1:217262998-217263214	S_Shore			NA			ESRRG	NM_001243505
cg25968569	-0.214669	-6.77323	3.38627e-05	0.013845	2.6909	13	77461335	F	KCTD12	NM_138444	TSS1500	chr13:77459322-77461099	S_Shore		RDMR	NA			KCTD12	NM_138444
cg04035828	-0.119754	-6.77063	3.39784e-05	0.0138786	2.68748	16	12405425	R	SNX29	NM_001080530	Body					TRUE			SNX29	BC172456
cg05394244	-0.152263	-6.76446	3.42547e-05	0.0139631	2.67935	6	64281439	F	PTP4A1	NM_003463	TSS1500	chr6:64282151-64283736	N_Shore		CDMR	NA			PTP4A1	NM_003463
cg08370178	-0.173482	-6.76396	3.42772e-05	0.0139631	2.67869	5	43034043	R				chr5:43037259-43037520	N_Shelf			NA			C5orf39	NM_001014279
cg18040354	-0.113911	-6.76375	3.42865e-05	0.0139631	2.67842	17	53800484	R	TMEM100;TMEM100	NM_018286;NM_001099640	TSS1500;5'UTR					NA			TMEM100	NM_018286
cg24117274	-0.164609	-6.76009	3.44518e-05	0.0140167	2.67359	1	21945805	R	RAP1GAP;RAP1GAP;RAP1GAP	NM_001145658;NM_001145657;NM_002885	Body;Body;Body	chr1:21948674-21949263	N_Shelf			TRUE			RAP1GAP	BC035030
cg22851880	-0.198334	-6.75906	3.44984e-05	0.0140219	2.67223	1	36038701	R	TFAP2E	NM_178548	TSS1500	chr1:36038927-36040051	N_Shore			NA	1:36038329-36039236	Unclassified_Cell_type_specific	TFAP2E	NM_178548
cg25114611	-0.086395	-6.75755	3.4567e-05	0.0140359	2.67024	6	35696870	R	FKBP5;LOC285847	NM_001145775;NR_027117	TSS1500;Body	chr6:35695725-35696156	S_Shore			NA	6:35695296-35697254	Promoter_Associated	FKBP5	NM_001145775
cg11218619	-0.100112	-6.74889	3.49626e-05	0.0141827	2.65882	3	197144458	F							DMR	NA			DLG1	EF553524
cg02616418	-0.10438	-6.74647	3.50742e-05	0.0141958	2.65562	4	154125681	R	TRIM2;TRIM2;TRIM2	NM_015271;NM_015271;NM_001130067	5'UTR;1stExon;5'UTR					NA			TRIM2	NM_015271
cg08463485	-0.0762778	-6.74632	3.50808e-05	0.0141958	2.65543	3	121740927	R	ILDR1;ILDR1	NM_175924;NM_175924	1stExon;5'UTR					NA	3:121740861-121741034	Unclassified_Cell_type_specific	ILDR1	NM_001199800
cg00931644	-0.227233	-6.7443	3.51743e-05	0.0141958	2.65276	13	77461368	F	KCTD12	NM_138444	TSS1500	chr13:77459322-77461099	S_Shore		RDMR	NA			KCTD12	NM_138444
cg16224163	-0.119535	-6.74392	3.5192e-05	0.0141958	2.65226	3	187870621	R	LPP	NM_001167672	TSS1500	chr3:187871478-187872354	N_Shore		RDMR	NA	3:187870342-187870712	Unclassified_Cell_type_specific	LPP	NM_001167672
cg03352173	-0.188992	-6.74379	3.5198e-05	0.0141958	2.65208	3	112013130	F	SLC9A10	NM_183061	TSS200					TRUE	3:112012143-112013192	Unclassified	SLC9A10	NM_183061
cg11857646	-0.120234	-6.74373	3.52005e-05	0.0141958	2.65201	7	150644631	R	KCNH2;KCNH2	NM_172057;NM_000238	Body;Body	chr7:150644455-150644767	Island		DMR	NA			KCNH2	NM_001204798
cg06962918	-0.126468	-6.74207	3.52774e-05	0.014213	2.64982	7	18127112	R				chr7:18125914-18127009	S_Shore		CDMR	NA			HDAC9	NM_001204144
cg19153828	-0.131321	-6.74042	3.53544e-05	0.0142301	2.64763	2	127782651	R				chr2:127782613-127782829	Island			TRUE	2:127782233-127783614	Unclassified	BIN1	AK301153
cg04582254	-0.132767	-6.7348	3.56167e-05	0.0142946	2.64021	10	131756487	F	EBF3	NM_001005463	Body	chr10:131756690-131758787	N_Shore		RDMR	NA			EBF3	AK097335
cg05810872	-0.074182	-6.73384	3.56618e-05	0.0142946	2.63894	22	17851653	R				chr22:17849474-17850733	S_Shore		RDMR	NA	22:17851381-17851742	Unclassified_Cell_type_specific	CECR2	AK308330
cg18433380	-0.10676	-6.73368	3.56693e-05	0.0142946	2.63873	20	36149194	F	BLCAP;BLCAP;BLCAP;BLCAP;NNAT;NNAT;BLCAP	NM_001167821;NM_001167820;NM_001167822;NM_006698;NM_181689;NM_005386;NM_001167823	5'UTR;5'UTR;5'UTR;5'UTR;TSS1500;TSS1500;5'UTR	chr20:36148603-36150136	Island			NA			NNAT	NM_181689
cg04155485	-0.11137	-6.73365	3.56705e-05	0.0142946	2.6387	7	5535934	R	MIR589;FBXL18	NR_030318;NM_024963	TSS1500;Body	chr7:5534384-5534766	S_Shore			NA			MIR589	NR_030318
cg23197405	-0.15589	-6.7333	3.56872e-05	0.0142946	2.63823	12	54451938	R	FLJ12825	NR_026655	TSS200	chr12:54454249-54454458	N_Shelf			NA			FLJ12825	NR_026655
cg26069068	-0.202232	-6.73011	3.58376e-05	0.014341	2.63401	8	125741265	F	MTSS1	NM_014751	TSS1500	chr8:125739685-125741266	Island			NA			MTSS1	AK027015
cg01825213	-0.116465	-6.72894	3.58928e-05	0.0143447	2.63246	9	98979965	R				chr9:98980493-98980759	N_Shore			TRUE	9:98979908-98981046	Unclassified	HSD17B3	BT019371
cg00969087	-0.122306	-6.72844	3.59161e-05	0.0143447	2.63181	1	116710331	F				chr1:116710157-116710546	Island			TRUE	1:116710252-116712218	Promoter_Associated	MAB21L3	NM_152367
cg25738301	-0.0876606	-6.72762	3.5955e-05	0.0143464	2.63072	12	104532524	F	NFYB	NM_006166	TSS1500	chr12:104531174-104532539	Island			NA			NFYB	AK311706
cg06699519	-0.0702122	-6.72662	3.60024e-05	0.0143515	2.6294	11	2398327	F	CD81	NM_004356	TSS1500	chr11:2398223-2399598	Island			NA	11:2398301-2398622	Promoter_Associated	CD81	NM_004356
cg16248287	-0.1254	-6.7257	3.60463e-05	0.0143519	2.62818	10	21804965	F	C10orf140	NM_207371	Body	chr10:21805197-21805459	N_Shore		CDMR	NA	10:21804943-21805025	Unclassified_Cell_type_specific	AK055656	AK055656
cg01235116	-0.0930644	-6.72514	3.60728e-05	0.0143519	2.62744	16	50705762	R	SNX20;SNX20	NM_153337;NM_001144972	Body;Body	chr16:50707291-50708041	N_Shore			NA	16:50705618-50706263	Unclassified	AF143871	AF143871
cg04758387	-0.0831537	-6.7244	3.61081e-05	0.0143522	2.62646	1	1851384	R	TMEM52	NM_178545	TSS1500	chr1:1850098-1851391	Island			NA			TMEM52	NM_178545
cg26867545	-0.207861	-6.72319	3.61656e-05	0.0143612	2.62486	10	21803830	R	C10orf140	NM_207371	3'UTR	chr10:21805197-21805459	N_Shore		RDMR	NA			AK055656	AK055656
cg01235820	-0.172619	-6.7213	3.62559e-05	0.0143705	2.62235	20	642782	R	SCRT2	NM_033129	3'UTR	chr20:642672-642895	Island			NA			SRXN1	NM_080725
cg00917156	-0.161038	-6.72125	3.62584e-05	0.0143705	2.62229	16	57831841	F	KIFC3;KIFC3;KIFC3;KIFC3	NM_005550;NM_001130100;NM_001130099;NM_001130099	Body;Body;1stExon;5'UTR					NA			KIFC3	AK299431
cg00232483	-0.113484	-6.71916	3.63582e-05	0.0143829	2.61953	16	19849514	F	IQCK	NM_153208	Body					TRUE			GPRC5B	FJ529380
cg18210365	-0.0915897	-6.7177	3.64282e-05	0.0143829	2.6176	15	65066710	F	RBPMS2	NM_194272	Body	chr15:65066916-65068352	N_Shore		RDMR	NA	15:65066672-65066819	Unclassified_Cell_type_specific	RBPMS2	NM_194272
cg19803952	-0.103194	-6.7177	3.64284e-05	0.0143829	2.61759	20	44036136	R	DBNDD2;DBNDD2;DBNDD2;DBNDD2;SYS1-DBNDD2;DBNDD2;DBNDD2	NM_001048224;NM_001048222;NM_001048225;NM_001048226;NR_003189;NM_001048221;NM_001048223	5'UTR;5'UTR;TSS1500;TSS1500;Body;5'UTR;5'UTR	chr20:44034458-44035954	S_Shore		DMR	NA			DBNDD2	NM_001048225
cg21160842	-0.176494	-6.7177	3.64284e-05	0.0143829	2.61759	11	32112091	F	RCN1	NM_002901	TSS1500	chr11:32112394-32113277	N_Shore			NA			RCN1	NM_002901
cg03480605	-0.0670486	-6.71218	3.66944e-05	0.0144628	2.61028	7	151038446	R	NUB1	NM_016118	TSS1500	chr7:151038858-151039136	N_Shore			NA	7:151038129-151039943	Promoter_Associated	NUB1	NM_001243351
cg07145744	-0.0923272	-6.71205	3.67007e-05	0.0144628	2.61011	3	43146836	F	C3orf39	NM_032806	5'UTR	chr3:43147184-43147713	N_Shore			NA	3:43146658-43148258	Promoter_Associated	C3orf39	NM_032806
cg09614479	-0.241086	-6.70837	3.68797e-05	0.0145195	2.60523	10	81967536	F				chr10:81964681-81965558	S_Shore		CDMR	NA			LOC439990	NR_038464
cg02564523	-0.165952	-6.70355	3.7115e-05	0.0145932	2.59884	7	102073539	F	ORAI2;ORAI2	NM_001126340;NM_032831	TSS1500;TSS1500	chr7:102073605-102074334	N_Shore			NA	7:102073432-102074979	Promoter_Associated	ORAI2	AK300574
cg17186803	-0.124571	-6.70309	3.71374e-05	0.0145932	2.59823	11	118023038	F	SCN4B;SCN4B	NM_001142348;NM_174934	Body;Body	chr11:118023352-118024194	N_Shore		CDMR	NA			SCN4B	NM_001142348
cg13838969	-0.157868	-6.69865	3.73558e-05	0.0146652	2.59234	20	56283964	F	PMEPA1;PMEPA1;PMEPA1;PMEPA1	NM_199171;NM_199170;NM_199169;NM_020182	5'UTR;5'UTR;Body;Body	chr20:56283891-56285395	Island		DMR	NA			PMEPA1	NM_020182
cg03071221	-0.0828279	-6.69294	3.76389e-05	0.0147623	2.58476	11	64176842	F								TRUE			BC038767	BC038767
cg20091689	-0.124276	-6.68749	3.79113e-05	0.0148394	2.57752	2	97524862	F	ANKRD39	NM_016466	TSS1500	chr2:97523356-97524186	S_Shore			NA	2:97524797-97525033	Unclassified_Cell_type_specific	ANKRD39	NM_016466
cg13388466	-0.173729	-6.68699	3.79362e-05	0.0148394	2.57686	17	14201744	F				chr17:14201726-14202052	Island		RDMR	NA			HS3ST3B1	NM_006041
cg09562539	-0.0859132	-6.68685	3.79431e-05	0.0148394	2.57668	8	21924859	F	EPB49;EPB49;EPB49;EPB49;EPB49;EPB49	NM_001114139;NM_001978;NM_001114135;NM_001114138;NM_001114136;NM_001114137	Body;Body;Body;Body;Body;Body	chr8:21923840-21924633	S_Shore			TRUE	8:21924027-21924891	Unclassified	EPB49	CCDS47821
cg03718845	-0.158436	-6.68566	3.80032e-05	0.0148434	2.57509	2	85640001	F				chr2:85640969-85641259	N_Shore			NA			CAPG	AK313898
cg19351398	-0.10142	-6.68315	3.81293e-05	0.0148434	2.57176	7	149472134	R	SSPO	NM_198455	TSS1500	chr7:149470114-149471054	S_Shore			NA			SSPO	NM_198455
cg23507953	-0.0891071	-6.68286	3.81441e-05	0.0148434	2.57137	17	46638127	R	HOXB3	NM_002146	5'UTR	chr17:46641534-46642110	N_Shelf			TRUE	17:46638064-46638206	Unclassified_Cell_type_specific	HOXB3	U59298
cg21144120	-0.144307	-6.68272	3.8151e-05	0.0148434	2.57119	6	28661199	R								NA			TRNA_Pseudo	.
cg08336425	-0.188926	-6.68258	3.81581e-05	0.0148434	2.571	12	125140167	F								TRUE			NCOR2	NM_001206654
cg10783149	-0.143609	-6.68189	3.81928e-05	0.0148434	2.57009	14	55707866	F								NA			FBXO34	NM_017943
cg10645314	-0.0428333	-6.68167	3.82041e-05	0.0148434	2.56979	2	3704589	R	ALLC	NM_018436	TSS1500					NA			ALLC	NM_018436
cg01332054	-0.216943	-6.68067	3.82547e-05	0.0148491	2.56846	15	74494861	F	STRA6;STRA6;STRA6;STRA6;STRA6	NM_001142617;NM_001142618;NM_001142619;NM_022369;NM_001142620	5'UTR;5'UTR;5'UTR;5'UTR;5'UTR			low-CpG:72281833-72282584		TRUE			STRA6	NM_001199042
cg14142171	-0.0499731	-6.67995	3.82913e-05	0.0148494	2.5675	6	30228101	F	HLA-L	NR_027822	Body	chr6:30227320-30228255	Island		DMR	NA	6:30226801-30228252	Promoter_Associated	HLA-L	NR_027822
cg22510412	-0.1154	-6.67383	3.86028e-05	0.0149272	2.55936	20	36149121	F	BLCAP;BLCAP;BLCAP;BLCAP;NNAT;NNAT;BLCAP	NM_001167821;NM_001167820;NM_001167822;NM_006698;NM_181689;NM_005386;NM_001167823	5'UTR;5'UTR;5'UTR;5'UTR;TSS1500;TSS1500;5'UTR	chr20:36148603-36150136	Island			NA			NNAT	NM_181689
cg01070987	-0.113905	-6.67276	3.86575e-05	0.0149272	2.55794	3	149687002	R	PFN2;PFN2	NM_002628;NM_053024	Body;Body	chr3:149687877-149689537	N_Shore		CDMR	NA			PFN2	AK297915
cg08000731	-0.286387	-6.67235	3.86785e-05	0.0149272	2.5574	11	316247	R				chr11:315739-316539	Island			NA	11:316185-316760	Unclassified_Cell_type_specific	IFITM1	NM_003641
cg10321156	-0.222592	-6.67191	3.87011e-05	0.0149272	2.55681	11	63687223	F				chr11:63685489-63685968	S_Shore			NA			RCOR2	NM_173587
cg10550416	-0.207257	-6.67166	3.87137e-05	0.0149272	2.55648	2	36776323	F	CRIM1	NM_016441	3'UTR					TRUE			FEZ2	BX537785
cg14289461	-0.131013	-6.67139	3.87275e-05	0.0149272	2.55612	6	112575929	R	LAMA4;LAMA4;LAMA4;LAMA4;LAMA4	NM_001105209;NM_001105206;NM_001105207;NM_002290;NM_001105208	TSS200;TSS200;TSS200;TSS200;TSS200	chr6:112575091-112575483	S_Shore	low-CpG:112682038-112682667		NA			LAMA4	NM_001105208
cg00982521	-0.17886	-6.67107	3.87441e-05	0.0149272	2.55569	6	41374806	F				chr6:41374527-41375187	Island			TRUE			NCR2	NM_001199509
cg12955216	-0.121736	-6.66959	3.882e-05	0.0149425	2.55373	7	44143438	R	AEBP1	NM_001129	TSS1500					TRUE			AEBP1	NM_001129
cg25103895	-0.0884103	-6.66787	3.89089e-05	0.0149628	2.55143	10	64565642	R	ADO;ADO	NM_032804;NM_032804	3'UTR;1stExon	chr10:64564435-64565818	Island			NA	10:64563751-64565681	Promoter_Associated	ADO	NM_032804
cg18493761	-0.171052	-6.6668	3.8964e-05	0.0149701	2.55001	11	125386885	R								TRUE			FEZ1	NM_022549
cg13474370	-0.168345	-6.66457	3.90794e-05	0.0150006	2.54704	15	65068885	R	RBPMS2	NM_194272	TSS1500	chr15:65066916-65068352	S_Shore			NA			RBPMS2	NM_194272
cg00658440	-0.185996	-6.66118	3.92553e-05	0.015047	2.54252	12	91774944	R								TRUE			DCN	NM_001920
cg06951677	-0.13481	-6.66084	3.9273e-05	0.015047	2.54207	1	221061837	R				chr1:221060850-221061071	S_Shore		RDMR	TRUE			HLX	NM_021958
cg23526676	-0.164702	-6.6584	3.94004e-05	0.0150818	2.53882	6	31734458	F	C6orf27	NM_025258	Body					NA			SAPCD1	AL122094
cg15015639	-0.12542	-6.65264	3.97027e-05	0.0151835	2.53114	2	220282977	R	DES	NM_001927	TSS200	chr2:220283200-220283750	N_Shore			TRUE			DES	NM_001927
cg12275060	-0.127433	-6.65173	3.97505e-05	0.0151878	2.52993	1	45279329	R	BTBD19	NM_001136537	Body	chr1:45278765-45279644	Island			NA	1:45278964-45279885	Promoter_Associated	BTBD19	AK304611
cg07720865	-0.106674	-6.64862	3.99146e-05	0.0152341	2.52579	2	103352342	F	MFSD9	NM_032718	Body	chr2:103353138-103353414	N_Shore			NA			MFSD9	AK307178
cg05966431	-0.0781108	-6.64713	3.99936e-05	0.0152341	2.5238	1	7023864	F	CAMTA1	NM_015215	Body	chr1:7022001-7022308	S_Shore			NA	1:7022332-7023994	Unclassified_Cell_type_specific	CAMTA1	NR_038934
cg02438545	-0.106759	-6.64694	4.00041e-05	0.0152341	2.52354	9	99380444	R	CDC14B;CDC14B	NM_003671;NM_033331	Body;Body	chr9:99380814-99382236	N_Shore			NA			CDC14B	AK225361
cg06241374	-0.137279	-6.64666	4.00188e-05	0.0152341	2.52317	2	56410071	R	CCDC85A	NM_001080433	TSS1500	chr2:56410865-56412539	N_Shore			NA	2:56410030-56411079	Unclassified	CCDC85A	NM_001080433
cg01490733	-0.0690503	-6.64414	4.01528e-05	0.015271	2.51981	1	2247066	R				chr1:2245714-2247086	Island			NA	1:2246625-2247403	Unclassified	LOC100129534	NR_024489
cg04488758	-0.181317	-6.64206	4.02642e-05	0.0152968	2.51703	12	95945366	R	USP44	NM_032147	TSS200	chr12:95941906-95942979	S_Shelf			NA			USP44	NM_032147
cg23281018	0.0899819	6.64138	4.03004e-05	0.0152968	2.51613	1	944789	R				chr1:948670-948894	N_Shelf		CDMR	NA			ISG15	NM_005101
cg27527922	-0.0874978	-6.64031	4.0358e-05	0.0152968	2.51469	1	6260181	R	RPL22	NM_000983	TSS1500	chr1:6259178-6259883	S_Shore			NA	1:6258819-6260263	Promoter_Associated	RPL22	NM_000983
cg23006204	-0.169284	-6.63951	4.04006e-05	0.0152968	2.51363	9	130700866	R	DPM2	NM_003863	TSS200	chr9:130699759-130700266	S_Shore			NA			DPM2	NM_003863
cg12984877	-0.18059	-6.63916	4.04198e-05	0.0152968	2.51315	4	146856745	R	ZNF827	NM_178835	Body	chr4:146857334-146859082	N_Shore			NA			ZNF827	AF450485
cg07085632	-0.158037	-6.63874	4.04422e-05	0.0152968	2.5126	11	125974404	R								TRUE			CDON	NM_001243597
cg11835197	-0.118289	-6.63644	4.05658e-05	0.0153294	2.50953	1	36038514	R	TFAP2E	NM_178548	TSS1500	chr1:36038927-36040051	N_Shore			NA	1:36038329-36039236	Unclassified_Cell_type_specific	TFAP2E	NM_178548
cg24735235	-0.166831	-6.63577	4.06022e-05	0.0153294	2.50863	1	16163479	R	FLJ37453	NR_024279	Body	chr1:16163752-16164123	N_Shore			NA			SPEN	NM_015001
cg26629730	-0.119748	-6.63291	4.07565e-05	0.0153524	2.50482	22	43599560	R	SCUBE1	NM_173050	3'UTR					TRUE			AK056490	AK056490
cg04457658	-0.0998028	-6.6324	4.07842e-05	0.0153524	2.50413	6	37732313	F								TRUE			ZFAND3	NM_021943
cg27162435	-0.289134	-6.63152	4.0832e-05	0.0153524	2.50296	17	7833163	F	KCNAB3	NM_004732	TSS1500	chr17:7832532-7833164	Island			NA	17:7833067-7833374	Unclassified_Cell_type_specific	KCNAB3	BC096233
cg14732969	-0.171737	-6.63149	4.08337e-05	0.0153524	2.50291	3	97542158	R				chr3:97540664-97541633	S_Shore		RDMR	NA	3:97542101-97542215	Unclassified_Cell_type_specific	AK296966	AK296966
cg24851818	-0.0924016	-6.63122	4.08487e-05	0.0153524	2.50255	12	1738446	F	WNT5B;WNT5B;WNT5B	NM_032642;NM_030775;NM_032642	1stExon;5'UTR;5'UTR	chr12:1739286-1739833	N_Shore			NA	12:1737989-1740783	Unclassified	WNT5B	NM_032642
cg06489965	-0.189801	-6.6276	4.10456e-05	0.0154124	2.49771	16	3062975	R	CLDN9;CLDN9	NM_020982;NM_020982	1stExon;5'UTR	chr16:3063679-3063981	N_Shore			TRUE			CLDN9	NM_020982
cg14076971	-0.121059	-6.62514	4.11802e-05	0.015449	2.49442	1	2137665	F	C1orf86	NM_001146310	5'UTR	chr1:2136808-2137351	S_Shore			TRUE	1:2135990-2137939	Promoter_Associated	C1orf86	NM_001146310
cg08379987	-0.262666	-6.62355	4.12676e-05	0.0154629	2.49229	13	31507139	F	C13orf26	NM_152325	Body					TRUE			C13orf26	NM_152325
cg18507732	-0.143083	-6.6231	4.1292e-05	0.0154629	2.4917	14	65345681	R				chr14:65346111-65347346	N_Shore		RDMR	NA			SPTB	J05500
cg01426818	-0.176546	-6.62102	4.14066e-05	0.0154918	2.48891	17	77806444	R				chr17:77805866-77809046	Island			NA	17:77806080-77806785	Unclassified_Cell_type_specific	CBX4	NM_003655
cg04099095	-0.175009	-6.61813	4.15659e-05	0.0155064	2.48505	7	27278570	F				chr7:27278945-27279469	N_Shore			NA			EVX1	NM_001989
cg02729344	-0.152111	-6.61813	4.15664e-05	0.0155064	2.48504	16	49888237	R				chr16:49888474-49893354	N_Shore			NA			ZNF423	NM_015069
cg03773647	-0.177129	-6.61772	4.15889e-05	0.0155064	2.4845	11	57417949	R	YPEL4	NM_145008	TSS1500	chr11:57414400-57414664	S_Shelf			NA			YPEL4	BC064995
cg04797061	-0.0931056	-6.61699	4.16293e-05	0.0155064	2.48352	16	31159920	F	PRSS36	NM_173502	Body	chr16:31159576-31160009	Island			NA			PRSS36	AK297997
cg16874095	-0.0972844	-6.61693	4.16327e-05	0.0155064	2.48344	14	34529121	R				chr14:34529120-34529959	Island			TRUE	14:34529026-34530004	Promoter_Associated	EGLN3	NM_022073
cg16847396	-0.102775	-6.61494	4.17429e-05	0.015523	2.48078	8	10489236	R	RP1L1	NM_178857	5'UTR					NA			RP1L1	NM_178857
cg00701051	-0.170705	-6.61452	4.17666e-05	0.015523	2.48021	1	145385391	R				chr1:145385289-145385537	Island			NA			TRNA_Asn	.
cg04313735	-0.123817	-6.61333	4.18326e-05	0.015523	2.47862	11	73357194	F	PLEKHB1;PLEKHB1;PLEKHB1;PLEKHB1	NM_001130033;NM_021200;NM_001130035;NM_001130034	TSS200;TSS200;TSS1500;TSS1500				RDMR	NA			PLEKHB1	NM_001130033
cg02356435	-0.184569	-6.61332	4.18335e-05	0.015523	2.4786	3	16925533	R	PLCL2	NM_001144382	TSS1500	chr3:16925381-16926849	Island			NA	3:16925458-16925923	Promoter_Associated_Cell_type_specific	PLCL2	NM_001144382
cg07397296	-0.107885	-6.61275	4.18648e-05	0.015523	2.47785	21	43655316	R	ABCG1;ABCG1;ABCG1;ABCG1;ABCG1;ABCG1	NM_207628;NM_004915;NM_207174;NM_207627;NM_016818;NM_207629	Body;Body;Body;Body;Body;Body	chr21:43654846-43655465	Island			NA			5S_rRNA	.
cg04352088	-0.0653421	-6.61193	4.1911e-05	0.0155236	2.47674	22	43609331	R	SCUBE1	NM_173050	Body	chr22:43605965-43606236	S_Shelf			TRUE			AK056490	AK056490
cg10179300	-0.0703283	-6.61138	4.19414e-05	0.0155236	2.47601	5	14147618	F	TRIO	NM_007118	Body	chr5:14143017-14145350	S_Shelf			NA	5:14147527-14147710	Unclassified_Cell_type_specific	TRIO	U42390
cg25828185	-0.145992	-6.6094	4.20521e-05	0.0155507	2.47336	12	54455656	R	FLJ12825	NR_026655	Body	chr12:54454249-54454458	S_Shore			NA			FLJ12825	NR_026655
cg04155289	-0.141255	-6.6035	4.23841e-05	0.0156595	2.46546	7	94953770	R	PON1	NM_000446	1stExon	chr7:94953769-94953971	Island			TRUE	7:94953742-94954273	Unclassified_Cell_type_specific	PON1	NM_000446
cg02946294	-0.120081	-6.60223	4.24561e-05	0.0156644	2.46375	11	17034844	R	PLEKHA7	NM_175058	Body	chr11:17034843-17036404	Island			NA			PLEKHA7	NM_175058
cg12259522	-0.105042	-6.60193	4.24731e-05	0.0156644	2.46335	13	112310720	R								TRUE			C13orf16	NM_152324
cg12323347	-0.112133	-6.60086	4.25338e-05	0.0156712	2.46191	10	112256517	R	DUSP5	NM_004419	TSS1500	chr10:112257163-112258684	N_Shore			NA			DUSP5	NM_004419
cg03661817	-0.198383	-6.60026	4.25681e-05	0.0156712	2.4611	16	57831745	R	KIFC3;KIFC3;KIFC3;KIFC3	NM_005550;NM_001130100;NM_001130099;NM_001130099	Body;Body;1stExon;5'UTR					NA			KIFC3	AK299431
cg00106345	-0.25268	-6.59905	4.26366e-05	0.0156712	2.45949	7	27138396	F				chr7:27135342-27136736	S_Shore			NA	7:27138326-27138743	Gene_Associated_Cell_type_specific	HOTAIRM1	NR_038366
cg15059065	-0.118691	-6.59894	4.26427e-05	0.0156712	2.45934	19	17354961	F	NR2F6	NM_005234	Body	chr19:17355181-17356471	N_Shore		DMR	NA			NR2F6	NM_005234
cg04413853	-0.167035	-6.59773	4.27119e-05	0.0156827	2.45771	17	58499706	F	C17orf64	NM_181707	TSS200	chr17:58498711-58499332	S_Shore			TRUE			C17orf64	NM_181707
cg02906407	-0.0994584	-6.59502	4.28667e-05	0.0157138	2.45408	7	149485740	R	SSPO	NM_198455	Body	chr7:149487283-149487769	N_Shore			NA			SSPO	AK127639
cg13812230	-0.141956	-6.59442	4.2901e-05	0.0157138	2.45327	12	57915555	R	MBD6;DDIT3	NM_052897;NM_004083	TSS1500;TSS1500	chr12:57916322-57916810	N_Shore		RDMR	NA	12:57913637-57917461	Promoter_Associated	MBD6	NM_052897
cg13359765	-0.0830147	-6.59425	4.29105e-05	0.0157138	2.45305	1	234350988	F	SLC35F3	NM_173508	Body	chr1:234349884-234350471	S_Shore			NA			AK054726	AK054726
cg25484139	-0.139898	-6.59059	4.31209e-05	0.0157769	2.44813	3	13008273	F	IQSEC1;IQSEC1	NM_001134382;NM_014869	Body;Body	chr3:13008648-13009210	N_Shore		RDMR	NA	3:13008122-13010089	Promoter_Associated	IQSEC1	NM_014869
cg09203312	-0.132052	-6.58985	4.31635e-05	0.0157786	2.44714	13	20805196	F	GJB6;GJB6;GJB6;GJB6;GJB6	NM_001110220;NM_001110219;NM_001110221;NM_006783;NM_006783	5'UTR;5'UTR;5'UTR;5'UTR;1stExon	chr13:20806016-20806867	N_Shore			NA			GJB6	NM_006783
cg11166287	-0.0942916	-6.58779	4.32824e-05	0.0158023	2.44437	14	104888911	F								NA			AX746996	AX746996
cg03332701	-0.223305	-6.58674	4.33429e-05	0.0158023	2.44297	15	63793652	R				chr15:63796129-63797638	N_Shelf		DMR	NA			USP3	AK301563
cg26291600	-0.0679131	-6.58674	4.33429e-05	0.0158023	2.44297	10	45923705	R	ALOX5	NM_000698	Body	chr10:45922831-45923375	S_Shore			NA			DL492557	DL492557
cg24724689	-0.120335	-6.58545	4.34177e-05	0.0158157	2.44124	2	11087224	F								TRUE			KCNF1	NM_002236
cg00598429	-0.0866523	-6.58441	4.34779e-05	0.0158237	2.43984	17	45928250	R	SP6	NM_199262	5'UTR	chr17:45928211-45928710	Island			NA	17:45927810-45928919	Unclassified	SP6	AK127707
cg07600533	-0.19491	-6.58134	4.36565e-05	0.0158747	2.43572	22	50986031	F	KLHDC7B	NM_138433	TSS1500	chr22:50984972-50988141	Island	high-CpG:49332823-49332901		NA			KLHDC7B	NM_138433
cg06687640	-0.123562	-6.58018	4.37244e-05	0.0158788	2.43416	5	159560692	R								TRUE			PWWP2A	BC143437
cg09259843	-0.0552933	-6.57984	4.37445e-05	0.0158788	2.4337	2	25452362	R								TRUE	2:25451284-25452833	Unclassified	DNMT3A	NM_153759
cg23661466	-0.196019	-6.57674	4.39259e-05	0.0159307	2.42954	10	63657173	F								NA	10:63656264-63657713	Unclassified	ARID5B	NM_032199
cg12417775	-0.141637	-6.57446	4.406e-05	0.0159552	2.42647	1	212463238	F	PPP2R5A	NM_006243	Body	chr1:212457967-212459694	S_Shelf			NA			PPP2R5A	NM_006243
cg24675557	-0.0993542	-6.57391	4.40923e-05	0.0159552	2.42573	20	36149081	F	BLCAP;BLCAP;BLCAP;BLCAP;NNAT;NNAT;BLCAP	NM_001167821;NM_001167820;NM_001167822;NM_006698;NM_181689;NM_005386;NM_001167823	5'UTR;5'UTR;5'UTR;5'UTR;TSS1500;TSS1500;5'UTR	chr20:36148603-36150136	Island			NA			NNAT	NM_181689
cg17822955	-0.0946139	-6.57363	4.4109e-05	0.0159552	2.42535	1	209527491	R								NA	1:209527075-209528100	Unclassified	MIR205HG	NM_001104548
cg24850711	-0.143317	-6.57282	4.4157e-05	0.0159586	2.42426	13	29067224	R	FLT1;FLT1;FLT1;FLT1	NM_001159920;NM_001160030;NM_002019;NM_001160031	Body;Body;Body;Body	chr13:29067788-29069977	N_Shore		RDMR	NA			BC048278	BC048278
cg05208396	-0.0709606	-6.57005	4.43205e-05	0.0160038	2.42054	19	13975186	F				chr19:13975668-13976918	N_Shore		CDMR	NA	19:13974886-13975337	Unclassified_Cell_type_specific	MIR181C	NR_029613
cg23233742	-0.0881763	-6.56744	4.4476e-05	0.0160459	2.41702	5	139077894	F				chr5:139076542-139077179	S_Shore		RDMR	TRUE	5:139076721-139077981	Unclassified	CXXC5	AK001782
cg16513459	-0.253566	-6.56653	4.45298e-05	0.0160513	2.41581	17	7832932	R	KCNAB3	NM_004732	TSS200	chr17:7832532-7833164	Island			NA			KCNAB3	BC096233
cg19870370	-0.183776	-6.56377	4.46948e-05	0.0160869	2.41209	13	21010223	R	CRYL1	NM_015974	Body	chr13:21009774-21010338	Island			NA			MIR4499	NR_039721
cg22398616	-0.160814	-6.56358	4.47061e-05	0.0160869	2.41183	13	53314203	R	LECT1;LECT1	NM_001011705;NM_007015	TSS1500;TSS1500	chr13:53313127-53314045	S_Shore			NA	13:53314131-53314247	Unclassified_Cell_type_specific	LECT1	NM_001011705
cg12647497	-0.0700469	-6.56198	4.48018e-05	0.0161074	2.40968	1	110210265	R	GSTM2;GSTM2	NM_000848;NM_001142368	TSS1500;TSS1500	chr1:110210581-110210956	N_Shore		RDMR	TRUE			GSTM2	AK309796
cg13954213	-0.0814943	-6.56105	4.48575e-05	0.0161134	2.40843	2	217971590	R								TRUE			Pinc	.
cg11097968	-0.12256	-6.55869	4.49997e-05	0.0161504	2.40525	14	103012188	F				chr14:103010784-103011625	S_Shore			TRUE			MIR4309	NR_036192
cg26445608	-0.147907	-6.55655	4.51288e-05	0.0161828	2.40237	20	2780114	F	CPXM1	NM_019609	Body	chr20:2780978-2781497	N_Shore			TRUE			CPXM1	NM_019609
cg17107867	-0.0504969	-6.5542	4.52712e-05	0.0162198	2.3992	1	153522407	R	S100A3	NM_002960	TSS1500					NA			S100A3	NM_002960
cg24927687	-0.10096	-6.5527	4.53626e-05	0.0162385	2.39717	1	6336519	F	ACOT7;ACOT7;ACOT7;ACOT7	NM_181864;NM_181865;NM_007274;NM_181866	Body;Body;Body;Body	chr1:6339948-6340268	N_Shelf			TRUE			GPR153	NM_207370
cg16902087	-0.0964613	-6.55097	4.54677e-05	0.0162533	2.39484	1	2220497	R	SKI	NM_003036	Body	chr1:2222198-2222569	N_Shore			TRUE	1:2220449-2220705	Unclassified_Cell_type_specific	SKI	NM_003036
cg12477880	-0.269644	-6.55073	4.54824e-05	0.0162533	2.39452	21	36259241	F	RUNX1;RUNX1;RUNX1	NM_001001890;NM_001122607;NM_001754	1stExon;1stExon;Body	chr21:36258952-36259472	Island			NA			RUNX1	NM_001122607
cg02336104	-0.0837619	-6.54918	4.55766e-05	0.0162729	2.39244	3	71481486	R	FOXP1;FOXP1	NM_032682;NM_001012505	5'UTR;5'UTR					TRUE			FOXP1	BC054505
cg07124642	-0.101405	-6.54593	4.57758e-05	0.0163237	2.38805	17	39991813	F	NT5C3L	NM_052935	Body	chr17:39992021-39992627	N_Shore			NA	17:39991447-39992940	Unclassified	NT5C3L	NR_033464
cg06138226	-0.0973246	-6.5451	4.58271e-05	0.0163237	2.38693	17	45927893	F	SP6	NM_199262	5'UTR	chr17:45928211-45928710	N_Shore		RDMR	NA	17:45927810-45928919	Unclassified	SP6	AK127707
cg25980637	-0.101074	-6.54493	4.58372e-05	0.0163237	2.3867	1	16163967	R	FLJ37453	NR_024279	Body	chr1:16163752-16164123	Island			NA			SPEN	NM_015001
cg05413199	-0.150833	-6.54294	4.59596e-05	0.0163532	2.38402	16	67430454	R	ZDHHC1	NM_013304	Body	chr16:67427284-67428950	S_Shore			TRUE	16:67430346-67430519	Unclassified_Cell_type_specific	TPPP3	NM_016140
cg01572884	-0.103256	-6.53087	4.67104e-05	0.0166061	2.36772	1	110610266	R	ALX3	NM_006492	Body	chr1:110610265-110613303	Island			NA			ALX3	NM_006492
cg20455854	-0.153173	-6.52862	4.68519e-05	0.0166267	2.36468	5	139040849	R	CXXC5	NM_016463	5'UTR	chr5:139040819-139041028	Island			TRUE			CXXC5	AK001782
cg10788371	-0.0846558	-6.52772	4.69083e-05	0.0166267	2.36347	11	76381040	F	LRRC32;LRRC32;LRRC32	NM_001128922;NM_005512;NM_005512	5'UTR;1stExon;5'UTR	chr11:76381449-76382295	N_Shore	low-CpG:76058599-76058717		NA			LRRC32	AK314971
cg00142036	-0.223755	-6.5269	4.69601e-05	0.0166267	2.36236	10	13388442	R	SEPHS1	NM_012247	5'UTR					NA			SEPHS1	AK309829
cg06154311	-0.146792	-6.5256	4.7042e-05	0.0166267	2.36061	20	61002657	R	C20orf151	NM_080833	TSS200					TRUE			C20orf151	NM_080833
cg14286292	-0.0893666	-6.52532	4.70599e-05	0.0166267	2.36022	9	130546644	F				chr9:130547264-130549117	N_Shore			NA			MIR3960	NR_036055
cg03125400	-0.225759	-6.52529	4.70619e-05	0.0166267	2.36018	2	43327937	R				chr2:43327936-43328337	Island			NA			ZFP36L2	NM_006887
cg10453019	-0.150665	-6.52527	4.70626e-05	0.0166267	2.36017	3	16216215	F	GALNTL2;GALNTL2	NM_054110;NM_054110	5'UTR;1stExon					TRUE			GALNTL2	NM_054110
cg00827893	-0.110475	-6.52485	4.70894e-05	0.0166267	2.35959	13	33162946	F	PDS5B	NM_015032	5'UTR	chr13:33161192-33161835	S_Shore		RDMR	NA			PDS5B	U95825
cg02019125	-0.0973119	-6.52401	4.71424e-05	0.0166312	2.35846	3	156323952	F								TRUE			SSR3	NM_007107
cg24795825	-0.207662	-6.52136	4.7311e-05	0.0166765	2.35487	15	79164541	R	MORF4L1;MORF4L1	NM_206839;NM_006791	TSS1500;TSS1500	chr15:79165102-79166057	N_Shore			NA			MORF4L1	NM_006791
cg08457421	-0.0812542	-6.51959	4.74234e-05	0.0167019	2.35248	22	31536431	R	PLA2G3;PLA2G3	NM_015715;NM_015715	5'UTR;1stExon					TRUE	22:31536121-31536683	Unclassified	PLA2G3	NM_015715
cg05714552	-0.18603	-6.51878	4.7475e-05	0.0167059	2.35139	6	32118295	R	PRRT1	NM_030651	Body	chr6:32118101-32118544	Island			NA			PRRT1	AK123424
cg03642555	-0.0771997	-6.51483	4.77281e-05	0.0167807	2.34604	5	34502788	R								TRUE			RAI14	NM_001145522
cg04858586	-0.121864	-6.51326	4.78286e-05	0.0168018	2.34392	1	174843971	F	RABGAP1L;RABGAP1L	NM_001035230;NM_014857	TSS1500;Body					NA			RABGAP1L	NM_001243763
cg14530382	-0.140989	-6.50978	4.80533e-05	0.0168664	2.33921	19	6753525	R	SH2D3A	NM_005490	Body	chr19:6752515-6753657	Island			NA	19:6753153-6754127	Promoter_Associated	TRIP10	NM_004240
cg11957475	-0.153261	-6.50767	4.819e-05	0.0169	2.33635	18	57566144	F	PMAIP1	NM_021127	TSS1500	chr18:57566866-57567723	N_Shore		RDMR	NA			PMAIP1	JF432472
cg27661104	-0.131477	-6.50606	4.82945e-05	0.0169107	2.33417	2	232645033	F	PDE6D	NM_002601	Body	chr2:232645313-232646505	N_Shore			NA			PDE6D	AK311623
cg06543615	-0.141598	-6.50594	4.8302e-05	0.0169107	2.33401	2	133402475	R	GPR39;LYPD1;LYPD1	NM_001508;NM_144586;NM_001077427	Body;3'UTR;3'UTR	chr2:133402720-133403010	N_Shore			NA			LYPD1	AK130005
cg05741395	-0.0824863	-6.5052	4.83505e-05	0.0169133	2.333	15	42173869	F	SPTBN5	NM_016642	Body	chr15:42174084-42174855	N_Shore			TRUE	15:42173735-42173939	Unclassified_Cell_type_specific	SPTBN5	NM_016642
cg15088002	-0.130005	-6.50383	4.84398e-05	0.0169303	2.33115	3	78944334	F	ROBO1;ROBO1;ROBO1;ROBO1	NM_001145844;NM_001145845;NM_002941;NM_133631	Body;Body;Body;Body					TRUE			ROBO1	BC115021
cg26993102	-0.140902	-6.50299	4.84947e-05	0.0169352	2.33001	6	30228245	F	HLA-L	NR_027822	Body	chr6:30227320-30228255	Island			NA	6:30226801-30228252	Promoter_Associated	HLA-L	NR_027822
cg02712165	-0.115529	-6.50021	4.86766e-05	0.0169745	2.32624	17	16395957	F	C17orf76;C17orf76	NM_207387;NM_001113567	TSS1500;TSS1500	chr17:16394833-16395843	S_Shore			NA	17:16394389-16396172	Unclassified_Cell_type_specific	FAM211A	NM_207387
cg20396393	-0.0869769	-6.50002	4.86891e-05	0.0169745	2.32598	7	23720838	R	C7orf46;C7orf46;C7orf46	NM_199136;NM_001127364;NM_001127365	Body;Body;Body	chr7:23719619-23720006	S_Shore			NA			C7orf46	NM_199136
cg24526899	-0.126387	-6.49925	4.87391e-05	0.0169776	2.32495	14	54424149	F	BMP4;BMP4	NM_001202;NM_130850	TSS1500;TSS1500	chr14:54420184-54422958	S_Shore			NA			BMP4	NM_001202
cg16646600	-0.0939742	-6.49814	4.88122e-05	0.0169888	2.32344	1	54562543	R	C1orf83	NM_153035	3'UTR					NA			MIR4781	NR_039942
cg24329783	-0.139682	-6.4975	4.88541e-05	0.0169891	2.32258	1	161160887	R	ADAMTS4	NM_005099	3'UTR					NA			ADAMTS4	BC030812
cg26418770	-0.123701	-6.49644	4.89245e-05	0.0169993	2.32113	17	14206886	F	HS3ST3B1;MGC12916	NM_006041;NR_026880	Body;TSS200	chr17:14204168-14207702	Island		CDMR	NA	17:14205319-14207043	Promoter_Associated	MGC12916	NR_026880
cg06437922	-0.076274	-6.49346	4.91209e-05	0.0170532	2.3171	1	226308360	F				chr1:226308959-226310476	N_Shore			NA	1:226308309-226308444	Unclassified_Cell_type_specific	BC032899	BC032899
cg18537730	-0.174335	-6.48974	4.93679e-05	0.0171136	2.31205	19	49250080	R	IZUMO1;IZUMO1	NM_182575;NM_182575	1stExon;5'UTR	chr19:49253688-49254221	N_Shelf			NA			IZUMO1	NM_182575
cg07950803	-0.0738953	-6.4896	4.93773e-05	0.0171136	2.31186	1	158223934	F	CD1A;CD1A	NM_001763;NM_001763	1stExon;5'UTR					NA			CD1A	NM_001763
cg24217948	-0.17444	-6.48843	4.94553e-05	0.0171262	2.31027	18	42261980	R	SETBP1;SETBP1	NM_001130110;NM_015559	5'UTR;5'UTR	chr18:42258983-42260795	S_Shore		RDMR	TRUE			SETBP1	NM_015559
cg11512608	-0.158336	-6.48386	4.97611e-05	0.0172177	2.30407	11	73357276	F	PLEKHB1;PLEKHB1;PLEKHB1;PLEKHB1;PLEKHB1;PLEKHB1	NM_001130033;NM_021200;NM_021200;NM_001130035;NM_001130034;NM_001130033	5'UTR;1stExon;5'UTR;TSS1500;TSS1500;1stExon				RDMR	NA			PLEKHB1	NM_021200
cg02328930	-0.0441136	-6.48209	4.98802e-05	0.0172429	2.30166	16	85591871	R				chr16:85586938-85590618	S_Shore			NA	16:85590758-85592263	Promoter_Associated	KIAA0182	NM_001134473
cg23274030	-0.0726107	-6.48121	4.99392e-05	0.0172429	2.30047	10	120925632	F	SFXN4	NM_213649	TSS1500	chr10:120924785-120925558	S_Shore			NA	10:120924578-120925772	Promoter_Associated	SFXN4	NM_213649
cg18262201	-0.102003	-6.48088	4.99617e-05	0.0172429	2.30002	10	6187854	F	PFKFB3	NM_001145443	Body	chr10:6186520-6187855	Island			NA	10:6186421-6188130	Promoter_Associated	PFKFB3	AK304450
cg09978996	-0.0839741	-6.48006	5.00167e-05	0.0172429	2.29891	10	70321668	R	TET1	NM_030625	5'UTR	chr10:70320130-70320822	S_Shore			NA	10:70321659-70322030	Unclassified_Cell_type_specific	TET1	NM_030625
cg19699056	-0.102582	-6.47969	5.00419e-05	0.0172429	2.2984	7	73843743	R								TRUE			GTF2IRD1	NM_016328
cg05506292	-0.0639255	-6.47827	5.01378e-05	0.0172616	2.29647	15	85925235	F	AKAP13;AKAP13	NM_006738;NM_007200	5'UTR;5'UTR	chr15:85923604-85924680	S_Shore			NA			AKAP13	BC050312
cg16977035	-0.0913281	-6.47756	5.01861e-05	0.0172638	2.29551	11	44330474	F	ALX4	NM_021926	Body	chr11:44330542-44331761	N_Shore			NA			ALX4	NM_021926
cg24371574	-0.106295	-6.47362	5.04532e-05	0.0173413	2.29016	1	230428167	R								TRUE			GALNT2	BC050583
cg14342850	-0.141938	-6.4673	5.0886e-05	0.0174635	2.28157	9	34666173	R				chr9:34664930-34665687	S_Shore			NA			CCL27	NM_006664
cg19520710	-0.122137	-6.4672	5.0893e-05	0.0174635	2.28143	12	57915613	R	MBD6;DDIT3	NM_052897;NM_004083	TSS1500;TSS1500	chr12:57916322-57916810	N_Shore		RDMR	NA	12:57913637-57917461	Promoter_Associated	MBD6	NM_052897
cg17423650	-0.109584	-6.46517	5.10328e-05	0.017497	2.27867	1	185218725	R	C1orf26;C1orf26	NM_017673;NM_001105518	Body;Body					TRUE			JA611272	JA611272
cg25754958	-0.133985	-6.46058	5.13503e-05	0.0175913	2.27242	1	202130692	R	PTPN7	NM_002832	TSS1500			low-CpG:200397300-200397361		NA			PTPN7	AK301757
cg19615406	-0.0644838	-6.4589	5.1467e-05	0.0176104	2.27014	10	116164712	R	AFAP1L2;AFAP1L2	NM_032550;NM_001001936	TSS200;TSS200	chr10:116163391-116164599	S_Shore			NA			AFAP1L2	NM_032550
cg11934419	-0.118577	-6.45856	5.1491e-05	0.0176104	2.26967	6	112575850	R	LAMA4;LAMA4;LAMA4;LAMA4;LAMA4	NM_001105209;NM_001105206;NM_001105207;NM_002290;NM_001105208	TSS200;TSS200;TSS200;TSS200;TSS200	chr6:112575091-112575483	S_Shore	low-CpG:112682038-112682667		NA			LAMA4	NM_001105208
cg09201238	-0.0946586	-6.45434	5.17858e-05	0.0176894	2.26392	17	79486912	F				chr17:79485599-79486913	Island			NA	17:79485910-79487049	Unclassified	ACTG1	NR_037688
cg22950598	-0.110754	-6.45322	5.18641e-05	0.0176894	2.2624	12	56139862	R	GDF11	NM_005811	Body	chr12:56136783-56137784	S_Shelf			NA			GDF11	NM_005811
cg17431888	-0.108931	-6.45308	5.1874e-05	0.0176894	2.26221	1	183203863	F	LAMC2;LAMC2	NM_005562;NM_018891	Body;Body					TRUE	1:183203702-183204976	Unclassified_Cell_type_specific	NMNAT2	AK309461
cg10091752	-0.139837	-6.45274	5.18974e-05	0.0176894	2.26176	6	3455459	R	SLC22A23	NM_015482	Body	chr6:3456061-3457963	N_Shore		RDMR	TRUE			AK096549	AK096549
cg26435670	-0.0770921	-6.4516	5.19778e-05	0.0176894	2.2602	10	88515340	F	BMPR1A	NM_004329	TSS1500	chr10:88515426-88517217	N_Shore			NA			BMPR1A	NM_004329
cg03573390	-0.148282	-6.45159	5.19784e-05	0.0176894	2.26019	16	57294639	F	PLLP	NM_015993	Body					TRUE	16:57294421-57294640	Unclassified_Cell_type_specific	ARL2BP	AK311018
cg02776498	-0.137216	-6.449	5.21611e-05	0.017737	2.25665	11	73054185	F	ARHGEF17	NM_014786	Body	chr11:73053648-73054302	Island			NA			RELT	NM_152222
cg25641533	-0.190116	-6.44829	5.22113e-05	0.0177395	2.25569	6	31734580	F	C6orf27	NM_025258	Body					NA			SAPCD1	AL122094
cg05184456	0.0727412	6.44371	5.25359e-05	0.0178352	2.24945	8	145557639	F	SCRT1	NM_031309	Body	chr8:145555342-145562310	Island			NA			SCRT1	NM_031309
cg22670033	-0.135496	-6.44106	5.27246e-05	0.0178846	2.24584	5	180646608	R				chr5:180646688-180647049	N_Shore			NA			TRNA_Val	.
cg17454746	-0.111798	-6.43879	5.2887e-05	0.017925	2.24274	20	62716485	R	OPRL1;C20orf201;OPRL1	NM_000913;NM_001007125;NM_182647	5'UTR;TSS1500;5'UTR	chr20:62716288-62716533	Island			NA			OPRL1	NM_001200019
cg24222546	-0.168819	-6.4372	5.30011e-05	0.017949	2.24057	15	74501771	F	STRA6;STRA6;STRA6	NM_001142620;NM_001142617;NM_001142619	TSS1500;TSS1500;TSS1500					TRUE			STRA6	NM_001199040
cg03469862	-0.161769	-6.43541	5.31303e-05	0.0179731	2.23812	11	68924853	R				chr11:68924690-68924957	Island			NA	11:68924500-68925238	Unclassified_Cell_type_specific	BC064339	BC064339
cg25727093	-0.0779047	-6.43493	5.31642e-05	0.0179731	2.23748	20	44463168	F	SNX21;SNX21;SNX21;SNX21	NM_001042633;NM_152897;NM_033421;NM_001042632	Body;Body;Body;Body	chr20:44462383-44463169	Island			NA	20:44461878-44463530	Promoter_Associated	SNX21	AX746933
cg14316944	-0.0909826	-6.43384	5.32434e-05	0.0179731	2.23598	17	79485529	F				chr17:79485599-79486913	N_Shore			TRUE	17:79485417-79485870	Unclassified	ACTG1	NR_037688
cg23953176	-0.0882556	-6.4338	5.32459e-05	0.0179731	2.23593	2	947515	R	SNTG2	NM_018968	Body	chr2:945686-946774	S_Shore			NA	2:947440-947569	Unclassified_Cell_type_specific	SNTG2	BC125251
cg04589210	-0.11612	-6.43303	5.3302e-05	0.0179773	2.23487	2	86038589	R				chr2:86038311-86038666	Island			TRUE			LOC284950	NR_038888
cg27354586	-0.0570434	-6.4245	5.39221e-05	0.0181717	2.22322	11	118175172	F	CD3E	NM_000733	TSS200					NA	11:118175120-118176001	Promoter_Associated_Cell_type_specific	CD3E	NM_000733
cg26186954	-0.0851041	-6.42281	5.40454e-05	0.0181984	2.22092	8	87082008	R	PSKH2	NM_033126	TSS200	chr8:87081653-87082046	Island			NA			PSKH2	NM_033126
cg02932167	-0.13339	-6.41965	5.42777e-05	0.0182618	2.21661	2	233352951	R	ECEL1	NM_004826	TSS1500	chr2:233350278-233352974	Island			NA			ECEL1	NM_004826
cg01392313	-0.130476	-6.41759	5.44301e-05	0.0182982	2.21378	6	33561181	F	C6orf227	NR_027908	TSS200	chr6:33560892-33561189	Island			NA	6:33560263-33561550	Unclassified	LINC00336	NR_027908
cg03012289	-0.0881254	-6.41608	5.45416e-05	0.0183208	2.21172	8	110374374	R	PKHD1L1	NM_177531	TSS1500	chr8:110374552-110374793	N_Shore			TRUE			PKHD1L1	NM_177531
cg07107113	-0.141572	-6.41548	5.45857e-05	0.0183208	2.21091	1	16087752	F	FBLIM1	NM_017556	5'UTR	chr1:16085147-16085862	S_Shore			NA			FBLIM1	NM_017556
cg10604373	-0.0663358	-6.40935	5.50423e-05	0.0184275	2.20252	3	194004692	R								TRUE			LOC100131551	NR_024480
cg16301924	-0.135208	-6.40893	5.50737e-05	0.0184275	2.20194	13	53314226	R	LECT1;LECT1	NM_001011705;NM_007015	TSS1500;TSS1500	chr13:53313127-53314045	S_Shore			NA	13:53314131-53314247	Unclassified_Cell_type_specific	LECT1	NM_001011705
cg04975966	-0.0965603	-6.40841	5.5113e-05	0.0184275	2.20123	1	110609973	R	ALX3	NM_006492	Body	chr1:110610265-110613303	N_Shore			NA	1:110609945-110610099	Unclassified_Cell_type_specific	ALX3	NM_006492
cg21813538	-0.164304	-6.40839	5.51143e-05	0.0184275	2.2012	3	49967713	R	MON1A;MON1A	NM_001142501;NM_032355	TSS1500;TSS1500	chr3:49967121-49967472	S_Shore			NA	3:49966709-49967749	Promoter_Associated	MON1A	NM_001142501
cg08833636	-0.103502	-6.40823	5.51261e-05	0.0184275	2.20099	19	35715976	R	FAM187B	NM_152481	Body	chr19:35715623-35716120	Island			TRUE			FAM187B	NM_152481
cg07647651	-0.13101	-6.40398	5.54459e-05	0.0185195	2.19516	6	42878931	F				chr6:42879279-42879623	N_Shore			NA	6:42878858-42879050	Unclassified_Cell_type_specific	PTCRA	NM_001243170
cg11386711	-0.100677	-6.40303	5.55171e-05	0.0185283	2.19387	3	186651116	R	ST6GAL1;ST6GAL1	NM_173216;NM_173217	5'UTR;5'UTR	chr3:186648174-186649103	S_Shelf			NA			ST6GAL1	NM_173216
cg19131476	-0.0678572	-6.40065	5.56971e-05	0.0185653	2.19061	11	64387923	R	NRXN2;NRXN2;NRXN2	NM_138734;NM_138732;NM_015080	Body;Body;Body					TRUE			NRXN2	AK098211
cg00033155	-0.0936907	-6.40038	5.57177e-05	0.0185653	2.19024	2	110925418	F	NPHP1;NPHP1;NPHP1;NPHP1	NM_001128179;NM_207181;NM_000272;NM_001128178	Body;Body;Body;Body					TRUE			NPHP1	CU679489
cg19474833	-0.109933	-6.39907	5.58169e-05	0.0185834	2.18844	17	46622899	F	HOXB2	NM_002145	TSS1500	chr17:46620367-46621373	S_Shore		RDMR	NA			HOXB2	NM_002145
cg19590598	-0.143521	-6.39828	5.58773e-05	0.0185886	2.18735	2	127782813	F				chr2:127782613-127782829	Island			TRUE	2:127782233-127783614	Unclassified	BIN1	AK301153
cg05871254	-0.233441	-6.39473	5.61478e-05	0.0186636	2.18249	17	14213225	F	HS3ST3B1	NM_006041	Body	chr17:14212363-14212788	S_Shore		RDMR	TRUE	17:14212020-14213334	Promoter_Associated_Cell_type_specific	MGC12916	NR_026880
cg11632438	-0.124169	-6.39167	5.63819e-05	0.0187264	2.1783	3	158519176	R	MFSD1;MFSD1	NM_022736;NM_001167903	TSS1500;TSS1500	chr3:158519509-158520329	N_Shore			NA			MFSD1	AF351617
cg00574740	-0.101857	-6.39087	5.64429e-05	0.0187316	2.17721	13	76209541	R	LMO7	NM_005358	Body	chr13:76209540-76211213	Island			NA			LMO7	FJ711162
cg16009311	-0.146551	-6.38972	5.65315e-05	0.018746	2.17563	8	119086762	F	EXT1	NM_000127	Body					TRUE			AK025288	AK025288
cg05347794	-0.145026	-6.38852	5.66239e-05	0.0187616	2.17399	14	89866110	F	FOXN3;FOXN3	NM_005197;NM_001085471	Body;Body					TRUE			FOXN3	NM_005197
cg16060369	-0.120483	-6.3879	5.6672e-05	0.0187626	2.17313	10	43698834	R	RASGEF1A	NM_145313	Body	chr10:43697777-43698177	S_Shore			NA	10:43698826-43699342	Unclassified	RASGEF1A	AK095136
cg13127506	-0.0971023	-6.38379	5.69901e-05	0.0188432	2.16749	12	123757018	F	CDK2AP1	NM_004642	TSS1500	chr12:123755246-123756408	S_Shore			NA			CDK2AP1	NM_004642
cg12670305	-0.0917149	-6.38358	5.70065e-05	0.0188432	2.1672	6	31762630	F	VARS	NM_006295	Body	chr6:31763240-31763905	N_Shore			NA			VARS	AK302762
cg25233555	-0.0979866	-6.38225	5.71094e-05	0.0188436	2.16539	13	113525482	R	ATP11A;ATP11A	NM_015205;NM_032189	Body;Body					NA			AK025511	AK025511
cg03085785	-0.110185	-6.38213	5.71191e-05	0.0188436	2.16522	7	27247651	R				chr7:27244530-27245297	S_Shelf			NA			HOTTIP	NR_037843
cg11980897	-0.120789	-6.3818	5.71444e-05	0.0188436	2.16477	1	32237457	F				chr1:32237827-32238661	N_Shore			TRUE	1:32236958-32238593	Promoter_Associated_Cell_type_specific	BAI2	NM_001703
cg16412772	-0.146797	-6.3802	5.72693e-05	0.0188617	2.16257	8	65500144	F				chr8:65499748-65500145	Island		RDMR	NA			LOC401463	AK097150
cg05821634	-0.111446	-6.37993	5.72901e-05	0.0188617	2.1622	1	16164109	F	FLJ37453	NR_024279	Body	chr1:16163752-16164123	Island			NA			SPEN	NM_015001
cg15346781	-0.0777792	-6.37851	5.74014e-05	0.0188833	2.16025	2	7017571	F	RSAD2	NM_080657	TSS1500					NA	2:7017313-7018189	Unclassified_Cell_type_specific	RSAD2	NM_080657
cg05483076	-0.0485613	-6.37766	5.74681e-05	0.0188902	2.15908	5	74347539	R				chr5:74348241-74349681	N_Shore		RDMR	NA	5:74347489-74347740	Promoter_Associated_Cell_type_specific	GCNT4	NM_016591
cg27108424	-0.0830931	-6.37593	5.76036e-05	0.0189125	2.15671	17	75537017	F								NA			LOC100507351	NR_040050
cg17203352	-0.0858896	-6.37524	5.76576e-05	0.0189125	2.15576	17	48912487	R	WFIKKN2	NM_175575	TSS200					TRUE			WFIKKN2	NM_175575
cg23404330	-0.172032	-6.37505	5.76728e-05	0.0189125	2.1555	17	80251639	R				chr17:80251357-80251673	Island			NA	17:80250168-80251839	Promoter_Associated	BC033560	BC033560
cg03309252	-0.127838	-6.37423	5.77377e-05	0.018915	2.15437	9	98314632	R				chr9:98315341-98315559	N_Shore			NA			PTCH1	NM_001083602
cg18793806	-0.118303	-6.37379	5.77718e-05	0.018915	2.15377	2	95826087	F	ZNF514	NM_032788	TSS1500	chr2:95824802-95825721	S_Shore			NA			ZNF514	NM_032788
cg19351603	-0.106606	-6.37203	5.7911e-05	0.0189456	2.15134	19	45943663	R				chr19:45942865-45943396	S_Shore			NA	19:45942731-45943768	Promoter_Associated	ERCC1	NM_001166049
cg25125298	-0.128489	-6.37082	5.80063e-05	0.0189618	2.14969	5	71853215	F								NA			ZNF366	NM_152625
cg22065124	-0.0953191	-6.36849	5.81913e-05	0.0189981	2.14648	13	73649955	F	KLF5	NM_001730	Body					NA			KLF5	NM_001730
cg11715858	-0.115541	-6.36826	5.82092e-05	0.0189981	2.14617	7	1267228	R				chr7:1269165-1282864	N_Shore			NA			UNCX	NM_001080461
cg17375267	-0.0892076	-6.36653	5.83468e-05	0.0190281	2.14379	19	46915776	R	CCDC8	NM_032040	1stExon	chr19:46915311-46915802	Island			NA	19:46915496-46916445	Unclassified	CCDC8	NM_032040
cg27038634	-0.146911	-6.3647	5.84923e-05	0.0190575	2.14128	8	49468341	R				chr8:49468683-49468959	N_Shore		RDMR	TRUE			EFCAB1	NR_024605
cg16495212	-0.11137	-6.36424	5.85291e-05	0.0190575	2.14065	15	83317306	F	CPEB1	NM_030594	TSS1500	chr15:83315116-83317541	Island			NA	15:83315862-83317582	Unclassified	CPEB1	NM_030594
cg04937851	-0.117854	-6.36349	5.85895e-05	0.0190621	2.13961	2	237993660	R	COPS8;COPS8	NM_198189;NM_006710	TSS1500;TSS1500	chr2:237994004-237994876	N_Shore			NA	2:237993660-237995483	Promoter_Associated	COPS8	NM_006710
cg16298547	-0.0804318	-6.36037	5.88397e-05	0.0191285	2.13532	5	60138761	F	ELOVL7;ELOVL7	NM_024930;NM_001104558	5'UTR;5'UTR	chr5:60139359-60140155	N_Shore			NA			ELOVL7	BC094792
cg18487916	-0.134008	-6.35912	5.89399e-05	0.0191461	2.1336	3	52748469	R	NEK4	NM_003157	Body					NA			GLT8D1	AF176777
cg15648792	-0.0962993	-6.35844	5.89947e-05	0.0191489	2.13267	18	11146255	R	FAM38B	NM_022068	Body	chr18:11148307-11149936	N_Shelf			NA			PIEZO2	NM_022068
cg06141004	-0.101381	-6.35682	5.9125e-05	0.0191636	2.13044	7	6867070	F	C7orf28B	NM_198097	TSS1500	chr7:6865701-6866094	S_Shore			NA			CCZ1B	NM_198097
cg01687862	-0.120878	-6.35673	5.91326e-05	0.0191636	2.13031	7	75814979	R								TRUE			SRRM3	NM_001110199
cg12134349	-0.115599	-6.35572	5.92142e-05	0.019175	2.12893	8	142264816	F				chr8:142262456-142263238	S_Shore			NA	8:142264333-142265082	Unclassified_Cell_type_specific	SLC45A4	BC171836
cg00034559	-0.13598	-6.35324	5.9415e-05	0.019225	2.12551	2	39892124	F	TMEM178;TMEM178	NM_152390;NM_001167959	TSS1500;TSS1500	chr2:39893121-39893496	N_Shore			NA			TMEM178	NM_001167959
cg16253634	-0.158249	-6.35005	5.96749e-05	0.0192941	2.12112	7	134464123	F	CALD1;CALD1;CALD1	NM_004342;NM_033157;NM_033138	TSS200;TSS200;TSS200					NA			CALD1	AK304729
cg13063614	-0.0971869	-6.34789	5.98511e-05	0.0193279	2.11815	11	119020779	F	ABCG4;ABCG4	NM_001142505;NM_022169	Body;Body	chr11:119019643-119020887	Island			NA			ABCG4	NM_001142505
cg13655082	-0.219139	-6.34762	5.98729e-05	0.0193279	2.11778	9	125109046	R				chr9:125109007-125109644	Island			NA	9:125108910-125109514	Unclassified_Cell_type_specific	PTGS1	AK308222
cg12883767	-0.133711	-6.34691	5.99313e-05	0.0193317	2.1168	12	58013109	F	SLC26A10	NM_133489	TSS1500	chr12:58013171-58013652	N_Shore		RDMR	NA			SLC26A10	AK122981
cg16138602	-0.110166	-6.3422	6.03185e-05	0.0194414	2.11031	12	31078790	F	TSPAN11	NM_001080509	TSS1500	chr12:31079243-31079878	N_Shore		CDMR	NA			TSPAN11	AK293947
cg00188627	-0.163643	-6.34111	6.04086e-05	0.0194553	2.1088	3	159557779	R	SCHIP1	NM_014575	Body				RDMR	NA			SCHIP1	NM_001197109
cg09496748	-0.149226	-6.33929	6.05594e-05	0.0194887	2.10629	2	198029215	R	ANKRD44	NM_153697	Body	chr2:198029068-198029438	Island			TRUE			ANKRD44	CCDS33355
cg18823647	-0.138494	-6.33849	6.06255e-05	0.0194949	2.10519	4	99580449	F	TSPAN5	NM_005723	TSS1500	chr4:99579142-99580160	S_Shore		RDMR	NA	4:99580307-99580598	Promoter_Associated	TSPAN5	NM_005723
cg19731612	-0.183942	-6.33777	6.06855e-05	0.019499	2.10419	5	176559334	R	NSD1;NSD1	NM_022455;NM_172349	TSS1500;TSS1500	chr5:176558852-176561652	Island			TRUE			NSD1	NM_172349
cg21100518	-0.191267	-6.33673	6.07712e-05	0.0195114	2.10277	6	29595002	F	GABBR1;GABBR1;GABBR1	NM_021904;NM_021903;NM_001470	Body;Body;Body	chr6:29595298-29595795	N_Shore			NA			GABBR1	NM_021903
cg11757040	-0.143688	-6.33416	6.09861e-05	0.0195652	2.09922	14	73209188	F	DPF3	NM_012074	Body					TRUE			DPF3	AK126074
cg07975680	-0.0613084	-6.3308	6.12665e-05	0.01964	2.09459	10	73225789	F	CDH23;CDH23	NM_052836;NM_022124	Body;Body					TRUE			CDH23	CCDS44429
cg18994033	-0.11832	-6.32753	6.15417e-05	0.0197039	2.09008	2	231733416	R	ITM2C;ITM2C;ITM2C	NM_001012516;NM_030926;NM_001012514	Body;Body;Body	chr2:231729631-231730821	S_Shelf		RDMR	NA			ITM2C	NM_030926
cg26687842	-0.13712	-6.3273	6.15609e-05	0.0197039	2.08976	13	41055491	F	LOC646982;LOC646982;LOC646982	NR_024505;NR_024507;NR_024506	TSS1500;TSS1500;TSS1500					NA			TTL	NR_024507
cg04487205	-0.123969	-6.32654	6.16253e-05	0.0197092	2.08871	17	36997563	F	C17orf98	NM_001080465	1stExon	chr17:36997448-36997661	Island			NA			C17orf98	NM_001080465
cg06692785	-0.119805	-6.32537	6.17239e-05	0.0197255	2.0871	1	180882681	F	KIAA1614	NM_020950	Body	chr1:180881316-180882592	S_Shore			NA			KIAA1614	NM_020950
cg17108141	-0.155706	-6.32421	6.18227e-05	0.0197419	2.08549	1	86044230	F	DDAH1	NM_001134445	TSS200	chr1:86042229-86042935	S_Shore			TRUE	1:86042473-86044309	Unclassified	DDAH1	NM_001134445
cg05260877	-0.070085	-6.32252	6.19659e-05	0.0197724	2.08315	11	102068599	F	YAP1;YAP1	NM_001130145;NM_006106	Body;Body					TRUE			YAP1	AK304485
cg03670393	-0.122314	-6.3205	6.21375e-05	0.0198062	2.08037	4	81128690	F				chr4:81128229-81128691	Island			TRUE			PRDM8	NM_001099403
cg08802841	-0.189779	-6.32014	6.21677e-05	0.0198062	2.07988	12	89748726	F				chr12:89745168-89748144	S_Shore		CDMR	NA	12:89747962-89749741	Promoter_Associated	DUSP6	NM_022652
cg12080831	-0.0951447	-6.31942	6.22293e-05	0.0198106	2.07888	2	121697428	R	GLI2	NM_005270	Body					TRUE			GLI2	BC111410
cg01874867	-0.227332	-6.31532	6.25802e-05	0.0198924	2.07321	7	94954059	F	PON1	NM_000446	TSS200	chr7:94953769-94953971	S_Shore			TRUE	7:94953742-94954273	Unclassified_Cell_type_specific	PON1	NM_000446
cg14071650	-0.110618	-6.3153	6.25823e-05	0.0198924	2.07318	9	129379319	R	LMX1B	NM_002316	Body	chr9:129372737-129378106	S_Shore		RDMR	NA			LMX1B	NM_001174146
cg11518116	-0.0819128	-6.31268	6.28071e-05	0.0199449	2.06956	17	47144846	R								TRUE			B4GALNT2	NM_001159388
cg08787251	-0.0750531	-6.31226	6.28436e-05	0.0199449	2.06898	7	27281964	R	EVX1	NM_001989	TSS200	chr7:27282086-27283136	N_Shore		RDMR	NA			EVX1	NM_001989
cg14293323	-0.118001	-6.31115	6.29394e-05	0.01996	2.06744	11	353567	F				chr11:355947-356447	N_Shelf		CDMR	NA			B4GALNT4	NM_178537
cg04905079	-0.103155	-6.307	6.32984e-05	0.0200585	2.06171	20	3149259	R	ProSAPiP1	NM_014731	TSS200	chr20:3148649-3149060	S_Shore			TRUE	20:3148652-3149288	Unclassified_Cell_type_specific	ProSAPiP1	NM_014731
cg03460756	-0.165526	-6.30474	6.34948e-05	0.0201053	2.05859	17	45353128	F	ITGB3	NM_000212	Body					TRUE			ITGB3	AY826979
cg10381888	-0.170711	-6.3031	6.36384e-05	0.0201354	2.05631	6	30228243	F	HLA-L	NR_027822	Body	chr6:30227320-30228255	Island			NA	6:30226801-30228252	Promoter_Associated	HLA-L	NR_027822
cg26480889	-0.102319	-6.30175	6.37565e-05	0.0201574	2.05444	2	118942960	F				chr2:118943823-118944199	N_Shore			TRUE	2:118942789-118944592	Promoter_Associated	Mir_544	.
cg04615859	-0.120978	-6.29912	6.39866e-05	0.0202033	2.05081	17	7762123	F	CYB5D1;LSMD1	NM_144607;NM_032356	Body;TSS1500	chr17:7760281-7761680	S_Shore			NA			AK125598	AK125598
cg14563637	-0.153483	-6.29898	6.39995e-05	0.0202033	2.05061	9	98931801	R								TRUE			LOC158435	BC008050
cg05077231	-0.143758	-6.29764	6.41173e-05	0.0202251	2.04875	13	49793054	F	MLNR	NM_001507	TSS1500	chr13:49794125-49795542	N_Shore			NA			MLNR	NM_001507
cg16800939	-0.120981	-6.29467	6.43792e-05	0.0202923	2.04464	14	100631798	R								NA			DEGS2	NM_206918
cg01786329	-0.0833	-6.2896	6.48296e-05	0.0204109	2.03762	16	89114613	R				chr16:89114529-89114863	Island			NA	16:89114492-89114641	Unclassified_Cell_type_specific	AK055272	AK055272
cg13443605	-0.134569	-6.28932	6.48542e-05	0.0204109	2.03723	17	14207036	R	HS3ST3B1;MGC12916	NM_006041;NR_026880	Body;TSS200	chr17:14204168-14207702	Island		CDMR	NA	17:14205319-14207043	Promoter_Associated	MGC12916	NR_026880
cg15198094	-0.0888147	-6.2869	6.50708e-05	0.0204636	2.03387	1	200003342	R	NR5A2;NR5A2	NM_205860;NM_003822	Body;Body	chr1:200004474-200004933	N_Shore			TRUE			NR5A2	AK304344
cg04134748	-0.211638	-6.28607	6.5145e-05	0.0204714	2.03272	1	3052175	F	PRDM16;PRDM16	NM_022114;NM_199454	Body;Body					NA			MIR4251	NR_036215
cg08335389	-0.0719957	-6.28444	6.52907e-05	0.0204781	2.03047	12	109554302	F						low-CpG:108038628-108038787		NA			ACACB	AY382667
cg26189139	-0.152633	-6.2844	6.52947e-05	0.0204781	2.03041	8	22560972	R				chr8:22560949-22561271	Island			NA			EGR3	NM_004430
cg04890480	-0.101306	-6.28417	6.53149e-05	0.0204781	2.0301	1	181073734	R				chr1:181073917-181075002	N_Shore			NA			IER5	NM_016545
cg14241731	-0.0913217	-6.28275	6.54428e-05	0.0205027	2.02812	13	28960733	R	FLT1;FLT1;FLT1	NM_001160030;NM_001159920;NM_002019	Body;3'UTR;Body					TRUE			FLT1	S77814
cg02762475	-0.0921329	-6.28048	6.56479e-05	0.0205327	2.02497	5	1106118	F	SLC12A7	NM_006598	Body	chr5:1108802-1109051	N_Shelf			TRUE	5:1105436-1106432	Unclassified_Cell_type_specific	SLC12A7	NM_006598
cg01419914	-0.142699	-6.28009	6.5683e-05	0.0205327	2.02443	17	79374691	R	BAHCC1	NM_001080519	Body	chr17:79366806-79374742	Island			NA			MIR4740	NR_039894
cg08787968	-0.111079	-6.27951	6.57351e-05	0.0205327	2.02363	11	32451777	R	WT1;WT1;WT1;WT1	NM_024425;NM_024426;NM_000378;NM_024424	Body;Body;Body;Body	chr11:32452144-32452708	N_Shore		RDMR	NA	11:32451769-32451802	NonGene_Associated_Cell_type_specific	WT1	NM_001198552
cg05308645	-0.0741783	-6.27949	6.57367e-05	0.0205327	2.02361	3	184107534	R	CHRD	NM_003741	3'UTR	chr3:184104308-184104519	S_Shelf			NA			CHRD	AK300213
cg19449948	-0.141464	-6.27887	6.57934e-05	0.0205349	2.02274	15	96891476	R				chr15:96895306-96895729	N_Shelf		CDMR	NA			NR2F2	NM_001145157
cg01467100	-0.0630565	-6.27661	6.59982e-05	0.0205695	2.0196	10	6246406	F	PFKFB3;PFKFB3	NM_004566;NM_001145443	Body;Body	chr10:6242975-6246457	Island			NA			PFKFB3	AF056320
cg21187770	-0.13992	-6.27638	6.60189e-05	0.0205695	2.01929	2	26205876	F	KIF3C	NM_002254	TSS1500	chr2:26204554-26205649	S_Shore		RDMR	NA	2:26204073-26205999	Promoter_Associated	KIF3C	NM_002254
cg16617301	-0.119949	-6.276	6.60532e-05	0.0205695	2.01876	19	46999109	R	PNMAL2;PNMAL2	NM_020709;NM_020709	1stExon;5'UTR	chr19:46999028-46999290	Island			TRUE	19:46998994-46999364	Unclassified_Cell_type_specific	PNMAL2	NM_020709
cg00937681	-0.190239	-6.27432	6.6207e-05	0.0205922	2.01642	4	77723304	F				chr4:77723092-77723424	Island			NA			SHROOM3	AK128677
cg26107754	-0.0668727	-6.27411	6.62255e-05	0.0205922	2.01614	3	156848845	R								NA			LOC339894	NR_034007
cg13741394	-0.130285	-6.26978	6.66213e-05	0.0206981	2.01013	18	43417389	R	SIGLEC15	NM_213602	Body	chr18:43417388-43419103	Island			TRUE			SIGLEC15	AK301189
cg13617561	-0.116191	-6.2693	6.6666e-05	0.0206981	2.00945	11	67222073	F	CABP4	NM_145200	TSS1500					NA	11:67222032-67222214	Unclassified_Cell_type_specific	CABP4	NM_145200
cg19269473	-0.0911006	-6.26818	6.6769e-05	0.0207145	2.0079	17	55939590	R				chr17:55939088-55939591	Island			NA	17:55938175-55939806	Unclassified	MRPS23	NM_016070
cg26942124	-0.117335	-6.26519	6.70446e-05	0.0207844	2.00374	5	124080075	R	ZNF608	NM_020747	1stExon					NA			ZNF608	BC131507
cg04728789	-0.0763518	-6.26435	6.71218e-05	0.0207928	2.00258	22	38711154	F	CSNK1E;CSNK1E	NM_001894;NM_152221	5'UTR;5'UTR	chr22:38712684-38713333	N_Shore		RDMR	TRUE			CSNK1E	NM_152221
cg11672277	-0.158848	-6.26218	6.7323e-05	0.0208395	1.99957	18	32556104	R	MAPRE2	NM_001143826	TSS1500	chr18:32556654-32557883	N_Shore			NA	18:32556092-32557502	Promoter_Associated	MAPRE2	NM_001143826
cg19895047	-0.128131	-6.26003	6.75227e-05	0.0208857	1.99658	8	19460197	R	CSGALNACT1;CSGALNACT1;CSGALNACT1	NM_001130518;NR_024040;NM_018371	TSS200;Body;5'UTR	chr8:19459905-19460137	S_Shore			NA			CSGALNACT1	NM_001130518
cg24503003	-0.0987683	-6.25823	6.76903e-05	0.020922	1.99408	12	110682837	F								TRUE			ATP2A2	NM_170665
cg08149865	-0.08385	-6.25667	6.7836e-05	0.020939	1.99191	8	21914600	R	EPB49;EPB49;EPB49;EPB49	NM_001114135;NM_001114136;NM_001114139;NM_001114137	TSS1500;5'UTR;5'UTR;5'UTR	chr8:21914275-21914525	S_Shore			NA			EPB49	NM_001114135
cg04505252	-0.18107	-6.25656	6.78465e-05	0.020939	1.99175	6	15244745	F				chr6:15244877-15246160	N_Shore		RDMR	NA			JARID2	AK302624
cg13796381	-0.103791	-6.25599	6.78997e-05	0.0209398	1.99096	9	139872395	F	PTGDS	NM_000954	Body	chr9:139872237-139873143	Island			TRUE			PTGDS	NM_000954
cg11953775	-0.100082	-6.25416	6.80715e-05	0.0209772	1.98842	1	207597011	R								NA			CR2	BC032548
cg08508761	-0.0753251	-6.25278	6.82016e-05	0.0210016	1.98649	13	28930547	F	FLT1	NM_002019	Body					TRUE			FLT1	DQ836395
cg07010228	-0.0656687	-6.25087	6.83812e-05	0.0210413	1.98384	19	2253854	F	JSRP1	NM_144616	Body	chr19:2250560-2253959	Island		DMR	NA			JSRP1	NM_144616
cg15138125	-0.145385	-6.24794	6.86587e-05	0.021111	1.97975	1	157948893	F				chr1:157948720-157949053	Island			NA			KIRREL	AK297788
cg19683073	-0.116474	-6.24679	6.87672e-05	0.0211167	1.97816	5	79553267	F	SERINC5	NM_178276	TSS1500	chr5:79551369-79552294	S_Shore		RDMR	NA			SERINC5	BC101282
cg14748380	-0.220851	-6.24629	6.88149e-05	0.0211167	1.97746	1	179713788	R	FAM163A	NM_173509	5'UTR	chr1:179711947-179713951	Island			NA			FAM163A	NM_173509
cg23391473	-0.114141	-6.24613	6.88303e-05	0.0211167	1.97724	2	12911008	R								TRUE			MIR3125	NR_036072
cg03890167	-0.134014	-6.24533	6.89063e-05	0.0211244	1.97612	1	203242638	F				chr1:203242519-203242818	Island			TRUE	1:203241935-203242840	Promoter_Associated	CHIT1	AK131093
cg10030162	-0.0672596	-6.24405	6.90276e-05	0.0211436	1.97435	16	49591203	R	ZNF423	NM_015069	Body					TRUE			ZNF423	AK304829
cg16595288	-0.101552	-6.2436	6.90712e-05	0.0211436	1.97371	10	43698931	F	RASGEF1A	NM_145313	Body	chr10:43697777-43698177	S_Shore			NA	10:43698826-43699342	Unclassified	RASGEF1A	AK095136
cg04956801	-0.0922095	-6.24264	6.91622e-05	0.0211559	1.97239	10	21798341	R				chr10:21797632-21799341	Island		RDMR	NA			AK055656	AK055656
cg07011168	-0.054604	-6.24024	6.93925e-05	0.0212023	1.96903	10	49797259	R	ARHGAP22	NM_021226	Body					TRUE			ARHGAP22	AB385228
cg09464728	-0.114816	-6.23999	6.94165e-05	0.0212023	1.96868	17	74533239	F	CYGB	NM_134268	Body	chr17:74533281-74534566	N_Shore			NA			CYGB	NM_134268
cg25567674	-0.0952628	-6.23941	6.94714e-05	0.0212035	1.96789	3	123751655	R				chr3:123751654-123753199	Island			NA	3:123751635-123752682	Unclassified_Cell_type_specific	KALRN	AK123068
cg24856064	-0.11439	-6.23749	6.96561e-05	0.0212442	1.96521	13	31506963	R	C13orf26	NM_152325	Body					TRUE			C13orf26	NM_152325
cg05082527	-0.115508	-6.23657	6.97451e-05	0.0212557	1.96392	11	57407842	R	MIR130A	NR_029673	TSS1500					NA			MIR130A	NR_029673
cg13298859	-0.11678	-6.23549	6.98489e-05	0.0212717	1.96242	7	2551996	F	LFNG	NM_001166355	TSS200					NA			LFNG	NM_001166355
cg15730491	-0.216255	-6.23364	7.0028e-05	0.0213105	1.95984	1	221068834	R				chr1:221068782-221069159	Island		RDMR	NA			HLX	NM_021958
cg08474748	-0.146135	-6.23268	7.01203e-05	0.021323	1.95851	5	74350214	F				chr5:74349800-74350239	Island			NA			GCNT4	NM_016591
cg04149015	-0.103891	-6.23175	7.02113e-05	0.021335	1.9572	16	31159854	R	PRSS36	NM_173502	Body	chr16:31159576-31160009	Island			NA			PRSS36	AK297997
cg27157482	-0.154737	-6.22881	7.04971e-05	0.0214	1.9531	7	27215606	R	HOXA10	NM_153715	Body	chr7:27212416-27214396	S_Shore			NA	7:27215447-27215636	Unclassified_Cell_type_specific	HOXA10	NM_018951
cg11001536	-0.115316	-6.22802	7.05741e-05	0.0214	1.952	5	153489773	F								TRUE			MFAP3	CCDS47319
cg03114845	-0.102483	-6.22682	7.06909e-05	0.0214	1.95034	12	66270387	R	HMGA2;HMGA2	NM_003484;NM_003483	Body;Body					TRUE			AY387666	AY387666
cg08330950	-0.220087	-6.22668	7.07046e-05	0.0214	1.95014	12	125140249	F								TRUE			NCOR2	NM_001206654
cg06954855	-0.083653	-6.22663	7.07098e-05	0.0214	1.95007	1	159801570	F	SLAMF8	NM_020125	Body					TRUE			SLAMF8	NM_020125
cg00761968	-0.0884749	-6.22637	7.07354e-05	0.0214	1.9497	13	53314142	F	LECT1;LECT1	NM_001011705;NM_007015	TSS200;TSS200	chr13:53313127-53314045	S_Shore			NA	13:53314131-53314247	Unclassified_Cell_type_specific	LECT1	NM_001011705
cg26562462	-0.064236	-6.22209	7.11548e-05	0.0215112	1.94374	4	6929045	F	TBC1D14;TBC1D14	NM_001113361;NM_020773	Body;Body	chr4:6925211-6925591	S_Shelf			NA	4:6928822-6929382	Promoter_Associated_Cell_type_specific	AX747238	AX747238
cg20964304	-0.102168	-6.22007	7.13545e-05	0.0215558	1.94091	11	125040416	F	PKNOX2	NM_022062	5'UTR	chr11:125034896-125036426	S_Shelf			TRUE			PKNOX2	AK316268
cg02592271	-0.131353	-6.21947	7.14135e-05	0.0215579	1.94008	2	27665507	R	KRTCAP3;KRTCAP3	NM_001168364;NM_173853	Body;Body	chr2:27665251-27665670	Island			NA	2:27664962-27665570	Promoter_Associated	KRTCAP3	AY358993
cg06378100	-0.161763	-6.21721	7.16375e-05	0.0216019	1.93692	16	48656724	R								TRUE	16:48656723-48657926	Promoter_Associated	N4BP1	NM_153029
cg09360974	-0.0844848	-6.21695	7.16634e-05	0.0216019	1.93655	11	66496490	R				chr11:66494937-66496387	S_Shore			NA	11:66494859-66496555	Unclassified_Cell_type_specific	SPTBN2	AF079569
cg24150385	-0.117281	-6.21491	7.1866e-05	0.0216426	1.93371	3	66543263	F	LRIG1	NM_015541	Body					TRUE			LRIG1	BC071561
cg03127104	-0.132059	-6.2143	7.19265e-05	0.0216426	1.93286	6	29599250	F	GABBR1;GABBR1	NM_021904;NM_001470	Body;Body	chr6:29600192-29600661	N_Shore		RDMR	NA			GABBR1	AF301005
cg11835619	-0.11979	-6.21401	7.19552e-05	0.0216426	1.93245	12	56475064	R	ERBB3;ERBB3	NM_001005915;NM_001982	Body;Body	chr12:56472792-56474393	S_Shore		RDMR	NA	12:56474673-56475488	Unclassified	ERBB3	AK300909
cg15001381	-0.138033	-6.21224	7.21323e-05	0.0216801	1.92997	16	403314	R	AXIN1;AXIN1	NM_181050;NM_003502	TSS1500;TSS1500					NA	16:401962-403486	Promoter_Associated	AXIN1	NM_003502
cg10875257	-0.149926	-6.21056	7.23003e-05	0.0217148	1.92763	6	28554274	R	SCAND3	NM_052923	1stExon	chr6:28554863-28555124	N_Shore		RDMR	NA			SCAND3	NM_052923
cg06445343	-0.0912658	-6.20874	7.24822e-05	0.021738	1.92509	7	94538403	F	PPP1R9A;PPP1R9A;PPP1R9A;PPP1R9A;PPP1R9A	NM_001166161;NM_001166160;NM_001166163;NM_001166162;NM_017650	TSS1500;5'UTR;TSS1500;TSS1500;5'UTR	chr7:94536849-94537477	S_Shore			NA			PPP1R9A	NM_001166163
cg22585988	-0.132923	-6.20874	7.24824e-05	0.021738	1.92509	1	161059327	F	PVRL4;PVRL4	NM_030916;NM_030916	5'UTR;1stExon					NA			PVRL4	NM_030916
cg00326251	-0.0566846	-6.20722	7.26354e-05	0.021739	1.92296	8	23262648	R	LOXL2	NM_002318	TSS1500	chr8:23260442-23261867	S_Shore		RDMR	NA			LOXL2	NM_002318
cg21370924	-0.146659	-6.20721	7.26364e-05	0.021739	1.92295	3	141087313	F	ZBTB38	NM_001080412	5'UTR			low-CpG:142569812-142570106		TRUE			ZBTB38	AK307452
cg13449377	-0.182001	-6.20714	7.26432e-05	0.021739	1.92286	7	96631089	F	DLX6AS	NR_015448	Body	chr7:96631383-96631800	N_Shore		RDMR	TRUE			DLX6-AS1	AX746939
cg13631094	-0.132124	-6.2059	7.27685e-05	0.0217608	1.92112	9	94619684	R	ROR2	NM_004560	Body					TRUE			ROR2	BC033697
cg10533331	-0.130724	-6.20452	7.2908e-05	0.0217859	1.91918	15	38857695	F	RASGRP1;RASGRP1	NM_001128602;NM_005739	TSS1500;TSS1500	chr15:38856262-38857658	S_Shore			NA	15:38855361-38857705	Promoter_Associated	RASGRP1	NM_005739
cg15611151	-0.15623	-6.20403	7.29576e-05	0.0217859	1.9185	12	54412269	R	HOXC4;HOXC5;HOXC6	NM_014620;NR_003084;NM_153693	5'UTR;Body;5'UTR	chr12:54412990-54413346	N_Shore			NA	12:54411351-54412742	Unclassified	HOXC5	NR_003084
cg02063695	-0.111536	-6.203	7.30615e-05	0.0218012	1.91706	1	17012568	R								NA			MIR3675	NR_037446
cg21217540	-0.150332	-6.19702	7.36699e-05	0.0219669	1.9087	1	110752307	R				chr1:110752256-110754794	Island		RDMR	NA			KCNC4	NM_004978
cg01023593	-0.0864741	-6.19569	7.38061e-05	0.0219917	1.90683	19	58962093	F	ZNF324B	NM_207395	TSS1500	chr19:58962740-58963343	N_Shore		RDMR	NA			ZNF324B	BC140882
cg22039909	-0.129512	-6.19206	7.41785e-05	0.0220867	1.90176	1	3635100	R	TP73;TP73;TP73;TP73	NM_001126240;NM_005427;NM_001126242;NM_001126241	Body;Body;Body;Body	chr1:3634633-3635101	Island			TRUE			TP73	AK295669
cg02358323	-0.126904	-6.19002	7.4389e-05	0.0221335	1.8989	11	44541718	F				chr11:44541537-44541956	Island			NA			CD82	NM_001024844
cg15803221	-0.169912	-6.18846	7.45502e-05	0.0221655	1.89671	17	38473166	F	RARA;RARA;RARA	NM_001145302;NM_000964;NM_001145301	TSS1500;5'UTR;TSS1500	chr17:38472958-38473201	Island			TRUE	17:38472852-38476047	Promoter_Associated	RARA	NM_001145302
cg12072028	-0.229549	-6.18413	7.49997e-05	0.0222688	1.89065	14	92981227	R	RIN3	NM_024832	Body	chr14:92979726-92981228	Island			NA			RIN3	NM_024832
cg23737263	-0.195123	-6.18408	7.50051e-05	0.0222688	1.89058	2	43328424	R				chr2:43327936-43328337	S_Shore		DMR	NA	2:43328303-43328464	Unclassified_Cell_type_specific	ZFP36L2	NM_006887
cg00124095	-0.0917207	-6.17908	7.55277e-05	0.0224079	1.88357	3	72305082	F								TRUE	3:72305024-72305627	Unclassified_Cell_type_specific	LOC201617	NR_038221
cg20051715	-0.0855945	-6.17827	7.56127e-05	0.0224139	1.88243	11	65639798	R	EFEMP2	NM_016938	Body	chr11:65639835-65641374	N_Shore			NA	11:65639213-65641545	Promoter_Associated	EFEMP2	NM_016938
cg02193146	-0.23004	-6.17786	7.56561e-05	0.0224139	1.88186	1	110752257	R				chr1:110752256-110754794	Island		RDMR	NA			KCNC4	NM_004978
cg25433552	-0.152738	-6.17676	7.57712e-05	0.0224167	1.88032	5	159560548	R								TRUE			PWWP2A	BC143437
cg21436544	-0.0661552	-6.17674	7.57739e-05	0.0224167	1.88028	1	95249289	R								TRUE			BC030750	BC030750
cg01444808	-0.0978508	-6.17425	7.60365e-05	0.0224784	1.8768	5	132113860	R	SEPT8;SEPT8;SEPT8;SEPT8	NM_015146;NM_001098813;NM_001098812;NM_001098811	TSS1500;TSS1500;TSS1500;TSS1500	chr5:132112448-132113621	S_Shore			NA			41160	NM_001098813
cg07083043	-0.140727	-6.17323	7.61444e-05	0.0224942	1.87536	17	17397972	R	RASD1	NM_016084	3'UTR	chr17:17398248-17400346	N_Shore		DMR	TRUE	17:17397803-17398125	Unclassified	RASD1	NM_001199989
cg04142296	-0.144752	-6.17119	7.63603e-05	0.0225419	1.87251	8	38757532	R	PLEKHA2	NM_021623	TSS1500	chr8:38758457-38759380	N_Shore		RDMR	NA			PLEKHA2	AK296068
cg12504148	-0.110994	-6.16898	7.6596e-05	0.0225947	1.8694	13	43597331	F	DNAJC15	NM_013238	TSS200	chr13:43597504-43597856	N_Shore			NA	13:43597275-43598292	Promoter_Associated_Cell_type_specific	DNAJC15	NM_013238
cg26820168	-0.0948579	-6.16849	7.66482e-05	0.0225947	1.86871	8	124217896	R	FAM83A;FAM83A	NM_032899;NM_207006	Body;Body	chr8:124219411-124219809	N_Shore			TRUE			LOC100131726	AY211906
cg20703671	-0.10639	-6.16679	7.68289e-05	0.0226319	1.86633	17	1396001	R	MYO1C;MYO1C	NM_001080779;NM_033375	TSS200;TSS1500	chr17:1394439-1394813	S_Shore			NA			MYO1C	NM_001080779
cg02962521	-0.146996	-6.16509	7.70114e-05	0.0226542	1.86394	18	19744694	R				chr18:19744936-19752363	N_Shore		DMR	NA			GATA6	NM_005257
cg08121652	-0.126434	-6.16506	7.70143e-05	0.0226542	1.8639	1	48381824	R								TRUE			LOC388630	NM_001194986
cg09802018	-0.0666632	-6.16437	7.70881e-05	0.0226598	1.86293	11	46357562	F	DGKZ	NM_201532	Body	chr11:46354091-46355190	S_Shelf			NA			DGKZ	NM_201532
cg14541011	-0.121971	-6.16313	7.7222e-05	0.0226831	1.86118	9	135989682	F	RALGDS;RALGDS	NM_001042368;NM_006266	Body;Body					TRUE	9:135989452-135989763	Unclassified_Cell_type_specific	RALGDS	AB037729
cg15671996	-0.117388	-6.16186	7.73579e-05	0.0226905	1.85941	6	30140325	R	TRIM15	NM_033229	3'UTR	chr6:30139718-30140263	S_Shore			TRUE			TRIM15	NM_033229
cg05404233	-0.0632136	-6.16098	7.74525e-05	0.0226905	1.85818	16	11490439	R								TRUE	16:11489001-11490810	Unclassified	RMI2	NM_152308
cg17590003	-0.156087	-6.16053	7.7501e-05	0.0226905	1.85754	17	25676574	R				chr17:25676304-25676603	Island			NA	17:25675910-25676740	Unclassified	WSB1	NM_015626
cg19727396	-0.107362	-6.16028	7.75284e-05	0.0226905	1.85719	1	230415185	R	GALNT2	NM_004481	Body	chr1:230415342-230415689	N_Shore			NA			GALNT2	BC050583
cg14177084	-0.128904	-6.15998	7.75611e-05	0.0226905	1.85676	7	75269642	F	HIP1	NM_005338	Body	chr7:75268004-75268871	S_Shore			NA			HIP1	NM_001243198
cg01003803	-0.0886782	-6.15914	7.76514e-05	0.0226905	1.85559	8	16859632	F	FGF20;FGF20	NM_019851;NM_019851	1stExon;5'UTR	chr8:16859044-16859452	S_Shore		RDMR	NA	8:16859616-16860165	Unclassified_Cell_type_specific	FGF20	BC141979
cg00285294	-0.100554	-6.15873	7.76957e-05	0.0226905	1.85501	7	1089767	R	C7orf50;C7orf50;C7orf50	NM_001134395;NM_032350;NM_001134396	Body;Body;Body	chr7:1090177-1090517	N_Shore			NA			GPR146	BD295650
cg03994959	-0.156932	-6.15856	7.77143e-05	0.0226905	1.85477	13	108866993	F	LIG4;LIG4;LIG4;LIG4	NM_002312;NM_002312;NM_206937;NM_001098268	5'UTR;1stExon;5'UTR;5'UTR	chr13:108867107-108867364	N_Shore			NA			LIG4	NM_002312
cg06724402	-0.12932	-6.15832	7.77403e-05	0.0226905	1.85443	11	101783583	F	ANGPTL5	NM_178127	5'UTR	chr11:101785594-101786128	N_Shelf			NA			KIAA1377	NM_020802
cg15142214	-0.0557597	-6.15775	7.78022e-05	0.0226926	1.85363	1	17512653	R								NA	1:17512592-17512865	Unclassified_Cell_type_specific	PADI1	NM_013358
cg24947451	-0.102384	-6.15654	7.79337e-05	0.0227149	1.85193	1	146649851	F	PDIA3P	NR_002305	Body	chr1:146649622-146649852	Island			NA			PDIA3P	NR_002305
cg15913725	-0.0467338	-6.15466	7.81377e-05	0.0227584	1.84929	2	3286479	R	TSSC1	NM_003310	Body	chr2:3286324-3286530	Island			NA			TSSC1	AK126288
cg02246725	-0.171036	-6.15357	7.82564e-05	0.0227735	1.84775	11	2014127	F				chr11:2013333-2013617	S_Shore			NA	11:2013889-2015034	Unclassified_Cell_type_specific	AK311497	AK311497
cg06452769	-0.173973	-6.15317	7.82993e-05	0.0227735	1.8472	8	145028093	R	PLEC1;PLEC1;PLEC1	NM_000445;NM_201378;NM_201379	Body;Body;TSS200	chr8:145027911-145028352	Island			NA			PLEC	NM_201379
cg15679892	-0.140883	-6.15153	7.84792e-05	0.0227985	1.84489	7	1267057	F				chr7:1265111-1265379	S_Shore		RDMR	NA	7:1266542-1267160	Unclassified_Cell_type_specific	UNCX	NM_001080461
cg03717239	-0.0567772	-6.15138	7.84954e-05	0.0227985	1.84468	8	145574318	R				chr8:145577098-145578142	N_Shelf			NA			C8ORFK29	NM_001252404
cg01467882	-0.076858	-6.15034	7.86087e-05	0.0228087	1.84322	2	153192938	R	FMNL2	NM_052905	Body	chr2:153191492-153192974	Island			NA			FMNL2	NM_052905
cg21549285	-0.158061	-6.15005	7.86409e-05	0.0228087	1.84281	21	42799141	R	MX1;MX1	NM_002462;NM_001144925	5'UTR;5'UTR	chr21:42798146-42798884	S_Shore			NA	21:42797543-42799269	Promoter_Associated_Cell_type_specific	MX1	NM_001178046
cg16109423	-0.107577	-6.14796	7.88701e-05	0.022855	1.83987	1	38022718	F	DNALI1	NM_003462	Body	chr1:38022452-38022719	Island			NA			DNALI1	NM_003462
cg02197293	-0.107492	-6.14717	7.89577e-05	0.022855	1.83875	19	39523158	F	FBXO27;FBXO27	NM_178820;NM_178820	5'UTR;1stExon	chr19:39522264-39523227	Island	high-CpG:44214717-44215253		NA	19:39523106-39523380	Unclassified_Cell_type_specific	FBXO27	NM_178820
cg03172657	-0.167334	-6.14709	7.89661e-05	0.022855	1.83864	16	89163625	R	ACSF3;ACSF3;ACSF3	NR_023316;NM_001127214;NM_174917	Body;5'UTR;5'UTR	chr16:89167116-89167482	N_Shelf			NA	16:89163402-89163779	Promoter_Associated_Cell_type_specific	ACSF3	NM_174917
cg03264209	-0.078746	-6.14517	7.91779e-05	0.0229003	1.83594	16	3931885	R				chr16:3930648-3931651	S_Shore			NA			CREBBP	NM_004380
cg21550024	-0.219215	-6.14441	7.92617e-05	0.0229086	1.83487	4	123747533	R	FGF2	NM_002006	TSS1500	chr4:123747740-123748980	N_Shore			NA			FGF2	NM_002006
cg17017272	-0.10263	-6.13984	7.97681e-05	0.0230389	1.82844	15	91447374	F	MAN2A2	NM_006122	TSS200	chr15:91445563-91446768	S_Shore		RDMR	NA	15:91446968-91447517	Promoter_Associated	MAN2A2	NM_006122
cg00374747	-0.0977112	-6.13904	7.98571e-05	0.0230485	1.82732	11	2907930	F	CDKN1C;CDKN1C;CDKN1C	NM_000076;NM_001122631;NM_001122630	TSS1500;TSS1500;TSS1500	chr11:2905023-2907024	S_Shore			NA			CDKN1C	NM_001122630
cg10880006	-0.142346	-6.13828	7.99422e-05	0.023057	1.82624	4	81122687	R	PRDM8;PRDM8	NM_001099403;NM_020226	Body;Body	chr4:81123508-81124318	N_Shore		RDMR	NA	4:81122504-81123698	Promoter_Associated	PRDM8	NM_001099403
cg06571559	-0.117783	-6.13657	8.01334e-05	0.023096	1.82383	10	670787	R	DIP2C	NM_014974	Body	chr10:669070-669336	S_Shore			TRUE			DL489896	DL489896
cg19258882	-0.0856645	-6.13315	8.05163e-05	0.0231903	1.81902	12	56472805	F	ERBB3;ERBB3	NM_001982;NM_001005915	TSS1500;TSS1500	chr12:56472792-56474393	Island			NA	12:56472390-56474357	Unclassified	ERBB3	BC002706
cg19726712	-0.118887	-6.13157	8.06936e-05	0.0232252	1.8168	8	98790327	F	LAPTM4B	NM_018407	Body	chr8:98787835-98788874	S_Shore		RDMR	NA			LAPTM4B	AK311377
cg12585943	-0.12958	-6.13105	8.07525e-05	0.023226	1.81606	6	32121368	F	PPT2;PPT2;PPT2	NM_005155;NM_138717;NM_138717	TSS1500;1stExon;5'UTR	chr6:32121829-32122529	N_Shore			NA	6:32120376-32123743	Promoter_Associated	PPT2	NM_138717
cg05563595	-0.0751816	-6.12765	8.11372e-05	0.0233154	1.81127	6	30140305	R	TRIM15	NM_033229	3'UTR	chr6:30139718-30140263	S_Shore			TRUE			TRIM15	NM_033229
cg03985415	-0.112457	-6.12731	8.11759e-05	0.0233154	1.81079	1	229340974	R								TRUE	1:229340687-229341089	Unclassified_Cell_type_specific	RAB4A	NM_004578
cg15951661	-0.164004	-6.12528	8.14055e-05	0.0233651	1.80793	14	71277141	R	MAP3K9	NM_033141	TSS1500	chr14:71275512-71276571	S_Shore		RDMR	NA			MAP3K9	NM_033141
cg26475541	-0.112439	-6.12252	8.17207e-05	0.0234267	1.80403	17	79026152	R	BAIAP2;BAIAP2;BAIAP2;BAIAP2	NM_017450;NM_006340;NM_001144888;NM_017451	Body;Body;Body;Body	chr17:79026043-79026355	Island			NA			BAIAP2	BC032559
cg03781224	-0.074499	-6.12153	8.18339e-05	0.0234267	1.80264	3	127481599	F	MGLL;MGLL	NM_007283;NM_001003794	Body;Body					TRUE	3:127481470-127481797	Unclassified_Cell_type_specific	MGLL	AY172950
cg17467968	-0.0750676	-6.12073	8.19247e-05	0.0234267	1.80152	15	77711092	R				chr15:77711625-77712910	N_Shore		RDMR	NA			PEAK1	NM_024776
cg12646820	-0.139178	-6.11971	8.20421e-05	0.0234267	1.80007	6	13924406	R	RNF182;RNF182;RNF182;RNF182	NM_001165033;NM_152737;NM_001165034;NM_001165032	TSS1500;TSS1500;TSS1500;TSS1500	chr6:13925099-13925510	N_Shore			NA	6:13924230-13926195	Unclassified	RNF182	NM_001165034
cg03586793	-0.148564	-6.11968	8.20455e-05	0.0234267	1.80003	14	104312558	F	PPP1R13B	NM_015316	Body	chr14:104313161-104314990	N_Shore		RDMR	NA			PPP1R13B	AK125913
cg04332373	-0.0650733	-6.11952	8.20634e-05	0.0234267	1.79981	4	15779642	F	CD38	NM_001775	TSS1500	chr4:15779998-15780729	N_Shore			NA	4:15779632-15781494	Promoter_Associated	CD38	AK297592
cg27251412	-0.0841547	-6.11917	8.21042e-05	0.0234267	1.79931	21	45705740	R	AIRE	NM_000383	TSS200	chr21:45705428-45706044	Island			NA			AIRE	NM_000383
cg15180789	-0.130327	-6.11902	8.21207e-05	0.0234267	1.79911	3	159557797	F	SCHIP1	NM_014575	Body				RDMR	NA			SCHIP1	NM_001197109
cg20605061	-0.053937	-6.11895	8.2129e-05	0.0234267	1.799	2	176973835	F	HOXD11	NM_021192	Body	chr2:176971706-176972305	S_Shore			NA			HOXD11	NM_021192
cg06340942	-0.124606	-6.11811	8.22251e-05	0.0234379	1.79782	22	19513106	R	CLDN5;CLDN5	NM_003277;NM_001130861	TSS1500;TSS1500	chr22:19510871-19512254	S_Shore			NA	22:19512893-19513221	Unclassified_Cell_type_specific	CLDN5	NM_003277
cg04763519	-0.182825	-6.11381	8.27209e-05	0.0235553	1.79175	6	1619094	R				chr6:1619093-1621094	Island		RDMR	TRUE	6:1618619-1619125	Unclassified	FOXC1	NM_001453
cg03455765	-0.082697	-6.11356	8.27506e-05	0.0235553	1.79139	3	85011052	R	CADM2;CADM2	NM_001167675;NM_001167674	Body;Body	chr3:85008284-85008837	S_Shelf			NA			CADM2	NM_001167675
cg12682972	-0.169058	-6.11106	8.30398e-05	0.0236095	1.78787	2	102444908	F	MAP4K4;MAP4K4;MAP4K4	NM_145687;NM_004834;NM_145686	Body;Body;Body					TRUE	2:102444723-102445042	Unclassified_Cell_type_specific	MAP4K4	AK074900
cg24613050	-0.0857422	-6.11093	8.30549e-05	0.0236095	1.78769	10	81743128	R				chr10:81743127-81743547	Island			NA			SFTPD	NM_003019
cg11908057	-0.151539	-6.10798	8.33979e-05	0.0236907	1.78352	7	27171154	R	HOXA4	NM_002141	TSS1500	chr7:27169572-27170638	S_Shore		CDMR	NA			HOXA4	NM_002141
cg20287434	-0.122606	-6.10657	8.35633e-05	0.0236932	1.78152	17	79958592	F	ASPSCR1	NM_024083	Body	chr17:79958088-79958369	S_Shore			NA			STRA13	U95007
cg13412545	-0.141001	-6.10647	8.35748e-05	0.0236932	1.78139	5	172175765	F				chr5:172175480-172175883	Island			TRUE			DUSP1	AK127679
cg19530728	-0.181843	-6.10636	8.35882e-05	0.0236932	1.78122	1	45279132	R	BTBD19	NM_001136537	Body	chr1:45278765-45279644	Island			NA	1:45278964-45279885	Promoter_Associated	BTBD19	AK304611
cg27304565	0.054522	6.10595	8.36354e-05	0.0236932	1.78065	7	153287752	R								NA			DPP6	NM_001039350
cg26201952	-0.104335	-6.10272	8.40145e-05	0.0237843	1.77609	12	54446253	R	HOXC4;HOXC4	NM_014620;NM_153633	5'UTR;TSS1500	chr12:54447744-54448091	N_Shore			NA	12:54446153-54447426	Unclassified	HOXC4	NM_153633
cg10921702	-0.0353078	-6.09963	8.43786e-05	0.0238373	1.77172	6	30716324	R				chr6:30710307-30712440	S_Shelf			NA			IER3	NM_003897
cg07260927	-0.130361	-6.09959	8.43831e-05	0.0238373	1.77167	4	11428822	F	HS3ST1	NM_005114	5'UTR	chr4:11429414-11429633	N_Shore			NA			HS3ST1	NM_005114
cg14481315	-0.0838052	-6.09954	8.43901e-05	0.0238373	1.77158	2	74227474	F				chr2:74229477-74229996	N_Shelf			TRUE			5S_rRNA	.
cg01289290	-0.0410753	-6.09918	8.44319e-05	0.0238373	1.77108	3	14838153	R								TRUE			FGD5	BC144300
cg13080282	-0.171647	-6.09855	8.45067e-05	0.0238422	1.77019	12	24717178	R				chr12:24714956-24716243	S_Shore		CDMR	NA			SOX5	BC060773
cg11386011	-0.109676	-6.09588	8.48226e-05	0.023915	1.76642	6	32121156	F	PPT2;PPT2;PRRT1	NM_138717;NM_005155;NM_030651	TSS200;TSS1500;TSS1500	chr6:32121829-32122529	N_Shore			TRUE	6:32120376-32123743	Promoter_Associated	PPT2	NM_138717
cg22937320	-0.0906764	-6.09397	8.50505e-05	0.023963	1.76371	9	19032778	R	FAM154A	NM_153707	Body					NA			FAM154A	AK057474
cg10031651	-0.103661	-6.09279	8.51913e-05	0.0239801	1.76204	3	46621686	R	LRRC2;TDGF1	NM_024750;NM_003212	TSS200;Body	chr3:46618307-46618669	S_Shelf			NA			LRRC2	BC029118
cg25374359	-0.13102	-6.09249	8.52273e-05	0.0239801	1.76162	8	101661533	F	SNX31	NM_152628	Body	chr8:101661671-101662022	N_Shore		RDMR	TRUE			SNX31	NM_152628
cg18973939	-0.0930153	-6.09104	8.53999e-05	0.0240124	1.75957	1	16164122	F	FLJ37453	NR_024279	Body	chr1:16163752-16164123	Island			NA			SPEN	NM_015001
cg22454744	-0.0798991	-6.09019	8.55026e-05	0.024025	1.75836	14	105332600	R	KIAA0284;KIAA0284	NM_015005;NM_001112726	5'UTR;5'UTR	chr14:105332408-105332651	Island			NA			KIAA0284	NM_015005
cg02934525	-0.0861554	-6.08779	8.57897e-05	0.0240893	1.75498	4	117847521	F				chr4:117847087-117847522	Island			TRUE			TRAM1L1	NM_152402
cg18533225	-0.0912942	-6.08701	8.58847e-05	0.0240922	1.75386	22	50986813	R	KLHDC7B	NM_138433	1stExon	chr22:50984972-50988141	Island			NA	22:50986445-50987897	Promoter_Associated	KLHDC7B	NM_138433
cg20222519	-0.124392	-6.08674	8.59163e-05	0.0240922	1.75349	3	23245916	F	UBE2E2	NM_152653	5'UTR	chr3:23244050-23245071	S_Shore		DMR	NA			UBE2E2	NM_152653
cg22900206	-0.0924935	-6.08498	8.6129e-05	0.0241355	1.75099	2	187558355	F	FAM171B	NM_177454	TSS1500	chr2:187558794-187559012	N_Shore			NA			FAM171B	NM_177454
cg00443981	-0.127318	-6.0845	8.61875e-05	0.0241355	1.75031	17	58499679	F	C17orf64	NM_181707	TSS200	chr17:58498711-58499332	S_Shore			TRUE			C17orf64	NM_181707
cg10570754	-0.103873	-6.08395	8.62529e-05	0.0241375	1.74954	12	5589444	F	NTF3	NM_001102654	Body					TRUE			NTF3	NM_002527
cg07298299	-0.131397	-6.08076	8.66399e-05	0.0242249	1.74502	11	45943237	R	GYLTL1B;GYLTL1B	NM_152312;NM_152312	1stExon;5'UTR	chr11:45943513-45944852	N_Shore			NA			GYLTL1B	AK055829
cg13480937	-0.102303	-6.07977	8.67608e-05	0.0242249	1.74361	1	177112230	F	ASTN1;ASTN1	NM_207108;NM_004319	Body;Body					TRUE			ASTN1	AK309094
cg16659510	-0.101941	-6.07968	8.67712e-05	0.0242249	1.74349	16	87996870	F	BANP;BANP	NM_017869;NM_079837	5'UTR;5'UTR					NA	16:87996629-87997495	Promoter_Associated_Cell_type_specific	BANP	NM_001173542
cg03500056	-0.0838229	-6.07936	8.6811e-05	0.0242249	1.74303	16	8814507	F	ABAT;ABAT;ABAT	NM_020686;NM_001127448;NM_000663	5'UTR;TSS200;5'UTR					NA			ABAT	NM_001127448
cg14847009	-0.107039	-6.07854	8.69109e-05	0.0242249	1.74187	1	175162515	F	KIAA0040;KIAA0040;KIAA0040;KIAA0040	NM_001162895;NM_001162893;NM_001162894;NM_014656	TSS1500;TSS1500;TSS1500;TSS1500	chr1:175161900-175162364	S_Shore			NA			KIAA0040	NM_001162893
cg13461890	-0.068309	-6.07848	8.6918e-05	0.0242249	1.74178	9	4793992	F	RCL1	NM_005772	Body	chr9:4792556-4793553	S_Shore			NA			RCL1	NM_005772
cg20611334	-0.0915443	-6.07801	8.69745e-05	0.0242249	1.74113	1	33209453	R	KIAA1522	NM_020888	Body	chr1:33207636-33207874	S_Shore		RDMR	NA			KIAA1522	NM_020888
cg25257677	-0.190233	-6.07693	8.71068e-05	0.0242297	1.73959	8	22223985	R	SLC39A14;SLC39A14;SLC39A14;SLC39A14	NM_001135154;NM_015359;NM_001128431;NM_001135153	TSS1500;TSS1500;TSS1500;TSS1500	chr8:22224519-22225244	N_Shore		RDMR	NA	8:22223934-22225986	Promoter_Associated	SLC39A14	NM_001135154
cg07272042	-0.136998	-6.07692	8.71088e-05	0.0242297	1.73957	16	85860163	R				chr16:85863381-85863601	N_Shelf			NA			COX4I1	NM_001861
cg08004525	-0.103114	-6.07518	8.7321e-05	0.0242724	1.73711	13	50703549	F				chr13:50703685-50705025	N_Shore		RDMR	NA	13:50702745-50703962	Unclassified_Cell_type_specific	DLEU2	NR_002612
cg16674433	-0.134942	-6.07425	8.7435e-05	0.0242878	1.73579	17	19314408	F	RNF112	NM_007148	TSS200					NA			RNF112	AB026054
cg11210813	-0.122238	-6.07187	8.77279e-05	0.0243528	1.73242	20	35972385	F	SRC	NM_005417	TSS1500	chr20:35974177-35974913	N_Shore			NA	20:35972287-35972427	Unclassified_Cell_type_specific	SRC	NM_005417
cg07722657	-0.177868	-6.07021	8.7932e-05	0.0243931	1.73007	1	221060360	F				chr1:221060850-221061071	N_Shore		RDMR	NA			HLX	NM_021958
cg17406248	-0.141581	-6.0694	8.80322e-05	0.0244046	1.72892	9	97807693	F	C9orf3	NM_032823	Body	chr9:97807450-97807694	Island			TRUE			AL137535	AL137535
cg05517976	-0.0741473	-6.06885	8.81001e-05	0.0244071	1.72814	7	27220049	F	HOXA10	NM_153715	TSS200	chr7:27219309-27219750	S_Shore			NA	7:27218624-27220804	Unclassified	HOXA10-HOXA9	NR_037940
cg05749493	-0.155497	-6.06787	8.82223e-05	0.0244199	1.72674	20	3149278	F	ProSAPiP1	NM_014731	TSS200	chr20:3148649-3149060	S_Shore			TRUE	20:3148652-3149288	Unclassified_Cell_type_specific	ProSAPiP1	NM_014731
cg14583319	0.0628726	6.06753	8.82643e-05	0.0244199	1.72626	3	122997585	R								TRUE			SEC22A	AK057587
cg11869510	-0.0810752	-6.06411	8.8689e-05	0.024521	1.72141	17	65990431	F	C17orf58;C17orf58	NM_181656;NM_181655	TSS1500;TSS1500	chr17:65989221-65989646	S_Shore			NA	17:65988805-65990544	Promoter_Associated	C17orf58	NM_181656
cg27375378	-0.183152	-6.06361	8.87521e-05	0.0245221	1.7207	17	77806402	R				chr17:77805866-77809046	Island			NA	17:77806080-77806785	Unclassified_Cell_type_specific	CBX4	NM_003655
cg10099601	-0.18152	-6.06096	8.90828e-05	0.0245828	1.71694	7	28998577	R	TRIL	NM_014817	TSS1500	chr7:28995305-28998541	S_Shore			NA			DQ601810	DQ601810
cg26264232	-0.15965	-6.0606	8.91277e-05	0.0245828	1.71643	7	27138751	R				chr7:27135342-27136736	S_Shelf		RDMR	NA			HOTAIRM1	NR_038366
cg18482303	-0.167269	-6.06042	8.91498e-05	0.0245828	1.71618	2	135041380	F	MGAT5	NM_002410	Body					TRUE			MGAT5	NM_002410
cg15587771	-0.106917	-6.05991	8.92142e-05	0.0245842	1.71545	7	4050875	R	SDK1	NM_152744	Body					NA			SDK1	AK074083
cg02483593	-0.08075	-6.0585	8.9391e-05	0.0245983	1.71345	1	63792183	F				chr1:63782394-63790471	S_Shore			NA			FOXD3	NM_012183
cg17658213	-0.117031	-6.05741	8.95286e-05	0.0245983	1.7119	17	8218709	R	ARHGEF15	NM_173728	Body					TRUE			ARHGEF15	AK300327
cg02362978	-0.090041	-6.05715	8.95613e-05	0.0245983	1.71153	17	9550137	R	USP43	NM_153210	Body	chr17:9548389-9549616	S_Shore		RDMR	NA			USP43	NM_153210
cg19978242	-0.0583296	-6.05705	8.9574e-05	0.0245983	1.71139	10	121578846	F	INPP5F;INPP5F	NR_003252;NM_014937	Body;Body	chr10:121577529-121578385	S_Shore		RDMR	NA			INPP5F	NM_001243194
cg18599996	-0.111088	-6.0562	8.96811e-05	0.0245983	1.71018	3	148708821	R	GYG1	NM_004130	TSS1500	chr3:148709076-148710069	N_Shore			NA	3:148708680-148710697	Promoter_Associated	GYG1	NM_001184721
cg14864148	-0.150246	-6.05618	8.96834e-05	0.0245983	1.71015	11	73053649	R	ARHGEF17	NM_014786	Body	chr11:73053648-73054302	Island			NA			RELT	NM_152222
cg03848127	-0.114276	-6.05614	8.96887e-05	0.0245983	1.71009	5	100126093	F								TRUE			ST8SIA4	NM_175052
cg01145903	-0.136422	-6.05573	8.97406e-05	0.0245983	1.70951	5	115697588	F				chr5:115697134-115697589	Island			TRUE			SEMA6A	AK302928
cg10426370	-0.128849	-6.05506	8.98249e-05	0.0246051	1.70856	5	54282459	R	ESM1;ESM1	NM_001135604;NM_007036	TSS1500;TSS1500					NA			ESM1	NM_007036
cg03464655	-0.104114	-6.05323	9.00564e-05	0.0246278	1.70596	2	165811982	R	SLC38A11;SLC38A11	NM_173512;NM_173512	1stExon;5'UTR					NA			SLC38A11	BC125157
cg06714761	-0.147826	-6.05316	9.00646e-05	0.0246278	1.70587	1	201096289	R								TRUE			CACNA1S	NM_000069
cg27304519	-0.0524261	-6.05299	9.00861e-05	0.0246278	1.70563	10	14551091	F								NA			FAM107B	AL136885
cg03449398	-0.120319	-6.05218	9.01894e-05	0.0246398	1.70447	7	92673015	F				chr7:92672789-92673016	Island			NA			SAMD9	CCDS34680
cg05845403	-0.124644	-6.05117	9.03175e-05	0.0246432	1.70304	13	96293882	R	DZIP1;DZIP1	NM_198968;NM_014934	Body;Body	chr13:96293606-96294603	Island		CDMR	TRUE			DZIP1	NM_014934
cg10239860	-0.0765143	-6.05114	9.03211e-05	0.0246432	1.703	1	71172023	F								TRUE			BC041441	BC041441
cg05349624	-0.122372	-6.04753	9.07807e-05	0.0247376	1.69787	21	46856438	F	COL18A1	NM_130445	Body	chr21:46859182-46860069	N_Shelf			NA			COL18A1-AS1	NR_027498
cg02841651	-0.138116	-6.04749	9.07862e-05	0.0247376	1.69781	11	133449527	F								TRUE			OPCML	NM_001012393
cg19708901	-0.111174	-6.04699	9.08504e-05	0.0247388	1.6971	1	180882655	R	KIAA1614	NM_020950	Body	chr1:180881316-180882592	S_Shore			NA			KIAA1614	NM_020950
cg01596963	-0.10841	-6.04626	9.09433e-05	0.0247478	1.69606	11	62455830	R	LRRN4CL	NM_203422	Body	chr11:62455073-62455868	Island			NA			LRRN4CL	CCDS8030
cg04206967	-0.103274	-6.04547	9.1045e-05	0.0247592	1.69494	8	110098844	F	TRHR	NM_003301	TSS1500					NA			TRHR	NM_003301
cg26147459	-0.129614	-6.04432	9.11923e-05	0.0247693	1.6933	3	194592442	R								TRUE	3:194592403-194592558	Unclassified_Cell_type_specific	LOC100507391	NR_037891
cg23146346	-0.111326	-6.04425	9.12015e-05	0.0247693	1.6932	6	17282859	F	RBM24;RBM24;RBM24	NM_153020;NM_001143941;NM_001143942	TSS200;5'UTR;Body	chr6:17280739-17282334	S_Shore	low-CpG:17390836-17390841		NA			RBM24	NM_153020
cg03780927	-0.191136	-6.04352	9.12951e-05	0.0247784	1.69216	11	118781150	F	BCL9L;BCL9L	NM_182557;NM_182557	1stExon;5'UTR	chr11:118781060-118781732	Island			TRUE	11:118781076-118781706	Unclassified_Cell_type_specific	MIR4492	NR_039713
cg14467281	-0.0495451	-6.04279	9.1389e-05	0.0247877	1.69113	9	33044611	F	SMU1	NM_018225	3'UTR	chr9:33044245-33044612	Island			NA	9:33043801-33045159	Promoter_Associated	DNAJA1	AY186741
cg17863312	-0.112688	-6.04103	9.16156e-05	0.0248329	1.68862	17	14207968	F	HS3ST3B1;MGC12916	NM_006041;NR_026880	Body;Body	chr17:14204168-14207702	S_Shore		CDMR	NA	17:14207910-14208201	Promoter_Associated_Cell_type_specific	MGC12916	NR_026880
cg23081026	-0.0634323	-6.03886	9.18957e-05	0.0248925	1.68554	1	29452103	R				chr1:29447699-29451847	S_Shore			NA			TMEM200B	NM_001003682
cg26600753	-0.13451	-6.03771	9.20453e-05	0.0248935	1.6839	5	180622446	F	TRIM7;TRIM7;TRIM7;TRIM7;TRIM7	NM_203293;NM_203296;NM_203297;NM_203295;NM_203294	Body;Body;Body;Body;Body	chr5:180622178-180622658	Island			NA			TRNA_Thr	.
cg11811897	-0.069948	-6.03745	9.20788e-05	0.0248935	1.68353	7	47811084	R								TRUE			LINC00525	NR_038407
cg22755142	-0.205548	-6.03744	9.20797e-05	0.0248935	1.68352	2	16243377	F								TRUE			SNORA40	.
cg01103207	-0.0909554	-6.03642	9.22127e-05	0.0249132	1.68206	7	47535640	F	TNS3	NM_022748	5'UTR					TRUE			TNS3	BC071791
cg13545874	-0.0939552	-6.03562	9.23163e-05	0.0249249	1.68093	17	72984872	R	CDR2L	NM_014603	Body	chr17:72983621-72984591	S_Shore			NA	17:72983308-72985486	Unclassified	CDR2L	NM_014603
cg09748975	-0.175507	-6.0339	9.25403e-05	0.02494	1.67848	4	4864532	F	MSX1	NM_002448	Body	chr4:4864456-4864834	Island			NA			MSX1	NM_002448
cg02771336	-0.0680333	-6.03389	9.25418e-05	0.02494	1.67846	8	131289180	R	ASAP1	NM_018482	Body					TRUE			ASAP1-IT1	NR_002765
cg12368169	-0.111887	-6.03362	9.25774e-05	0.02494	1.67808	2	27073192	F	DPYSL5	NM_020134	5'UTR	chr2:27070302-27072922	S_Shore		CDMR	NA			DPYSL5	NM_001253724
cg17077610	-0.100761	-6.03149	9.28558e-05	0.02494	1.67504	10	22766143	R				chr10:22764708-22767050	Island		CDMR	TRUE			LOC100499489	NR_036533
cg03989567	-0.115478	-6.03127	9.28847e-05	0.02494	1.67473	1	236686012	R	LGALS8;LGALS8;LGALS8;LGALS8	NM_201543;NM_201545;NM_006499;NM_201544	TSS1500;5'UTR;TSS1500;TSS1500	chr1:236687071-236687608	N_Shore			NA			LGALS8	AF074002
cg26530319	-0.141193	-6.0305	9.29855e-05	0.02494	1.67363	1	221060923	R				chr1:221060850-221061071	Island		RDMR	NA			HLX	NM_021958
cg26188726	-0.151968	-6.03048	9.29874e-05	0.02494	1.67361	16	31225957	R	TRIM72	NM_001008274	5'UTR	chr16:31225956-31228264	Island			NA			TRIM72	NM_001008274
cg14837974	-0.055073	-6.03041	9.2997e-05	0.02494	1.67351	14	21110908	R	OR6S1	NM_001001968	TSS1500					NA			OR6S1	NM_001001968
cg08654091	-0.116377	-6.03029	9.30124e-05	0.02494	1.67334	1	227015418	R								TRUE	1:227015301-227016297	Promoter_Associated	PSEN2	NM_012486
cg16426764	-0.16863	-6.03025	9.30176e-05	0.02494	1.67328	10	126211892	R	LHPP;LHPP	NM_022126;NM_001167880	Body;Body					TRUE			LHPP	NM_001167880
cg02717339	-0.111434	-6.03012	9.30345e-05	0.02494	1.6731	2	97524767	R	ANKRD39	NM_016466	TSS1500	chr2:97523356-97524186	S_Shore			NA			ANKRD39	NM_016466
cg26090072	-0.0663519	-6.02779	9.33414e-05	0.0250061	1.66977	2	74669387	F	RTKN	NM_001015055	TSS1500	chr2:74667593-74669403	Island	high-CpG:74522525-74523063		NA	2:74668598-74669615	Unclassified	RTKN	NM_001015055
cg20314918	-0.0765692	-6.02677	9.34747e-05	0.0250256	1.66833	2	166151447	F	SCN2A;SCN2A;SCN2A	NM_001040142;NM_001040143;NM_021007	5'UTR;TSS1500;5'UTR					NA			SCN2A	NM_001040143
cg01757168	-0.253085	-6.02591	9.35893e-05	0.0250401	1.66709	3	128215565	R				chr3:128215212-128216905	Island		CDMR	NA			GATA2	NM_032638
cg19176285	0.0676558	6.02435	9.37943e-05	0.0250787	1.66488	6	31895179	R	C2;C2	NM_000063;NM_001145903	TSS200;TSS200					NA			CFB	AK304045
cg21545013	-0.0897446	-6.02333	9.39296e-05	0.0250987	1.66343	1	8407891	R				chr1:8403697-8404102	S_Shelf			NA			SLC45A1	AF118274
cg08605301	-0.1964	-6.02217	9.40832e-05	0.0251235	1.66178	7	29924135	F	WIPF3	NM_001080529	Body	chr7:29923882-29924264	Island			NA			WIPF3	BC156551
cg19405504	-0.164127	-6.02126	9.4204e-05	0.0251396	1.66048	3	129611515	F	TMCC1;TMCC1	NM_001128224;NM_001017395	5'UTR;5'UTR	chr3:129611920-129612884	N_Shore			NA	3:129611475-129611685	Promoter_Associated	TMCC1	NM_001128224
cg06289138	-0.0849647	-6.02028	9.43345e-05	0.0251582	1.65908	6	33561186	F	C6orf227	NR_027908	TSS200	chr6:33560892-33561189	Island			NA	6:33560263-33561550	Unclassified	LINC00336	NR_027908
cg09294095	-0.135701	-6.0194	9.44524e-05	0.0251691	1.65782	11	131630464	F	NTM	NM_001048209	Body					NA			NTM	AK293448
cg21721340	-0.125164	-6.01906	9.44979e-05	0.0251691	1.65733	20	62682309	F	SOX18	NM_018419	TSS1500	chr20:62679424-62680883	S_Shore			NA			SOX18	NM_018419
cg22104242	-0.111215	-6.01861	9.45575e-05	0.0251691	1.6567	5	60138883	R	ELOVL7;ELOVL7	NM_024930;NM_001104558	5'UTR;5'UTR	chr5:60139359-60140155	N_Shore			NA			ELOVL7	BC094792
cg10980495	-0.145849	-6.01759	9.46935e-05	0.0251768	1.65525	11	1774722	R	HCCA2;CTSD	NM_053005;NM_001909	Body;3'UTR	chr11:1774588-1775040	Island			NA	11:1774301-1774762	Unclassified_Cell_type_specific	IFITM10	NM_001170820
cg04699519	-0.18834	-6.01748	9.47081e-05	0.0251768	1.65509	6	16306096	F	ATXN1;ATXN1	NM_000332;NM_001128164	3'UTR;3'UTR					NA			GMPR	NM_006877
cg01338255	-0.0431674	-6.01542	9.49844e-05	0.0252291	1.65215	20	30176054	F				chr20:30175457-30176058	Island		CDMR	TRUE	20:30175310-30176217	Unclassified_Cell_type_specific	ID1	NM_181353
cg08023416	-0.126559	-6.01468	9.50832e-05	0.0252291	1.6511	2	102803787	F	IL1RL2	NM_003854	5'UTR	chr2:102803672-102804556	Island			TRUE			IL1RL2	BC107064
cg03010887	-0.143048	-6.01423	9.5144e-05	0.0252291	1.65045	16	85600235	F								NA			KIAA0182	NM_001134473
cg10471113	-0.155593	-6.0138	9.52022e-05	0.0252291	1.64983	16	1587842	F	IFT140;TMEM204	NM_014714;NM_024600	Body;Body	chr16:1587683-1587899	Island			NA	16:1587536-1589077	Unclassified_Cell_type_specific	TMEM204	NM_024600
cg15901783	-0.1767	-6.01331	9.52673e-05	0.0252291	1.64914	13	77461426	R	KCTD12	NM_138444	TSS1500	chr13:77459322-77461099	S_Shore		RDMR	NA			KCTD12	NM_138444
cg23028178	-0.155094	-6.01296	9.53153e-05	0.0252291	1.64863	1	236229267	F	NID1	NM_002508	TSS1500	chr1:236227682-236228817	S_Shore		RDMR	NA	1:236229110-236229552	Unclassified_Cell_type_specific	NID1	NM_002508
cg02056653	-0.15152	-6.01284	9.53311e-05	0.0252291	1.64847	5	140888468	F	PCDHGA4;PCDHGC3;PCDHGA12;PCDHGA11;PCDHGA11;PCDHGA9;PCDHGA1;PCDHGB1;PCDHGB6;PCDHGB3;PCDHGB7;PCDHGA6;PCDHGA8;PCDHGA10;PCDHGA5;PCDHGB4;PCDHGC4;PCDHGA3;PCDHGA2;PCDHGA7;PCDHGB2;PCDHGC5;PCDHGB5;PCDHGC3	NM_018917;NM_002588;NM_003735;NM_032092;NM_018914;NM_018921;NM_018912;NM_018922;NM_018926;NM_018924;NM_018927;NM_018919;NM_032088;NM_018913;NM_018918;NM_003736;NM_018928;NM_018916;NM_018915;NM_018920;NM_018923;NM_018929;NM_018925;NM_032403	Body;Body;Body;Body;Body;Body;Body;Body;Body;Body;Body;Body;Body;Body;Body;Body;Body;Body;Body;Body;Body;Body;Body;Body					TRUE	5:140888424-140888656	Unclassified_Cell_type_specific	DIAPH1	BC143414
cg07676709	-0.150508	-6.01134	9.55325e-05	0.0252539	1.64633	17	46673442	F	LOC404266;LOC404266;LOC404266;LOC404266;HOXB6;LOC404266	NR_033203;NR_033205;NR_033204;NR_033201;NM_018952;NR_033202	Body;Body;Body;Body;3'UTR;Body	chr17:46673532-46674181	N_Shore			NA			LOC404266	NR_033205
cg01931958	-0.0734091	-6.01083	9.56015e-05	0.0252539	1.64561	12	1099117	F	ERC1;ERC1;ERC1;ERC1;ERC1	NM_178040;NR_027949;NR_027946;NR_027948;NM_178039	TSS1500;TSS1500;TSS1500;TSS1500;TSS1500	chr12:1099557-1100785	N_Shore		RDMR	NA			BC039168	BC039168
cg14635586	-0.147515	-6.01079	9.5608e-05	0.0252539	1.64554	6	91321898	R				chr6:91320890-91321219	S_Shore		RDMR	NA			MAP3K7	NM_145332
cg07349815	-0.0856814	-6.00817	9.59614e-05	0.0253311	1.64181	3	123751269	R				chr3:123751654-123753199	N_Shore		RDMR	NA			KALRN	AK123068
cg10045354	-0.121966	-6.00744	9.60609e-05	0.0253412	1.64076	11	111169427	R	C11orf93;C11orf92	NM_001136105;NM_207429	TSS1500;5'UTR	chr11:111169304-111170428	Island			NA			C11orf93	NM_001136105
cg01099825	-0.0847086	-6.00502	9.639e-05	0.0254119	1.63731	9	140166114	R	COBRA1	NM_015456	Body	chr9:140167199-140167452	N_Shore			NA	9:140165724-140166258	Unclassified_Cell_type_specific	C9orf167	NM_017723
cg22946562	0.0770685	6.00379	9.65579e-05	0.025434	1.63555	2	1880012	R	MYT1L	NM_015025	Body					NA			MYT1L	BC071612
cg12736877	-0.188774	-6.00306	9.66573e-05	0.025434	1.63451	6	30039010	R	RNF39;RNF39	NM_170769;NM_025236	Body;Body	chr6:30038881-30039477	Island			NA			PPP1R11	AK310593
cg02275418	-0.0768222	-6.00265	9.67126e-05	0.025434	1.63393	3	15372726	R	SH3BP5;SH3BP5	NM_004844;NM_001018009	Body;5'UTR	chr3:15373314-15374209	N_Shore			NA			SH3BP5	NM_004844
cg21167643	-0.138096	-6.0026	9.67194e-05	0.025434	1.63386	1	223937196	F	CAPN2;CAPN2	NM_001748;NM_001146068	Body;Body	chr1:223936342-223937044	S_Shore			NA	1:223936454-223937448	Promoter_Associated	CAPN2	AK097247
cg07122893	-0.149813	-6.00182	9.68267e-05	0.025446	1.63274	1	161993133	F	OLFML2B	NM_015441	1stExon	chr1:161993022-161994131	Island			NA			OLFML2B	AK301499
cg13268590	-0.131185	-5.99969	9.71184e-05	0.0255065	1.6297	3	65940167	R	MAGI1;MAGI1;MAGI1	NM_015520;NM_001033057;NM_004742	Body;Body;Body					TRUE			MAGI1	AK310365
cg07225641	-0.156011	-5.99708	9.74784e-05	0.0255848	1.62596	3	46618325	F	LRRC2;TDGF1	NM_024750;NM_003212	5'UTR;TSS1500	chr3:46618307-46618669	Island			NA			TDGF1	NM_003212
cg01210589	-0.0828305	-5.99615	9.7606e-05	0.0256021	1.62464	14	89895742	F	FOXN3	NM_001085471	5'UTR					TRUE			LOC400236	NR_036500
cg20966270	-0.145643	-5.99563	9.7678e-05	0.0256047	1.6239	1	110752047	R				chr1:110752256-110754794	N_Shore		RDMR	NA			KCNC4	NM_004978
cg26416981	-0.108313	-5.99487	9.77829e-05	0.025616	1.62281	12	731864	F	NINJ2	NM_016533	Body					TRUE	12:731670-731867	Unclassified_Cell_type_specific	LOC100049716	AK056115
cg00308631	-0.0953489	-5.99392	9.79145e-05	0.0256343	1.62145	20	3149249	R	ProSAPiP1	NM_014731	TSS200	chr20:3148649-3149060	S_Shore			TRUE	20:3148652-3149288	Unclassified_Cell_type_specific	ProSAPiP1	NM_014731
cg14605021	-0.0998765	-5.99343	9.79817e-05	0.0256357	1.62076	8	16859754	F	FGF20	NM_019851	TSS200	chr8:16859044-16859452	S_Shore		RDMR	NA	8:16859616-16860165	Unclassified_Cell_type_specific	FGF20	NM_019851
cg25433316	-0.151788	-5.9907	9.83611e-05	0.0257187	1.61685	2	10197543	R	CYS1	NM_001037160	3'UTR					TRUE	2:10197467-10197905	Unclassified_Cell_type_specific	KLF11	NM_001177718
cg24372256	-0.184167	-5.98835	9.86897e-05	0.0257883	1.61348	21	43528868	F	UMODL1;UMODL1;C21orf128	NM_173568;NM_001004416;NR_027243	Body;Body;TSS1500	chr21:43526570-43526817	S_Shelf			NA	21:43527043-43528992	Unclassified	C21orf128	NR_027243
cg27491190	-0.101158	-5.98787	9.87569e-05	0.0257896	1.6128	12	46767943	R	SLC38A2	NM_018976	TSS1500	chr12:46765134-46766633	S_Shore		RDMR	NA	12:46766844-46767993	Promoter_Associated	SLC38A2	NM_018976
cg22953960	-0.17987	-5.9874	9.88218e-05	0.0257903	1.61213	10	22766081	F				chr10:22764708-22767050	Island		RDMR	TRUE			LOC100499489	NR_036533
cg26276650	-0.0923756	-5.98681	9.89049e-05	0.0257917	1.61128	2	10182878	R	KLF11	NM_003597	TSS1500	chr2:10182635-10184702	Island		DMR	NA	2:10182762-10183817	Unclassified	KLF11	NM_003597
cg24741609	-0.0761811	-5.98647	9.89518e-05	0.0257917	1.6108	1	54122060	R	GLIS1	NM_147193	5'UTR					TRUE			GLIS1	NM_147193
cg07529210	-0.137489	-5.98573	9.90554e-05	0.0257954	1.60975	12	122019110	F	KDM2B;KDM2B	NM_032590;NM_001005366	TSS200;TSS1500	chr12:122016170-122017693	S_Shore	low-CpG:120503262-120503513	RDMR	NA	12:122019013-122020752	Promoter_Associated	KDM2B	NM_032590
cg09346546	-0.0737527	-5.98548	9.90904e-05	0.0257954	1.60939	2	176943669	R				chr2:176944087-176948446	N_Shore			NA	2:176943502-176943765	Unclassified_Cell_type_specific	EVX2	NM_001080458
cg07914621	-0.123775	-5.98486	9.91778e-05	0.0258019	1.6085	7	150101498	R	LOC728743	NR_027237	TSS1500	chr7:150101906-150102968	N_Shore		RDMR	NA			LOC728743	BC143767
cg24579589	-0.137517	-5.98379	9.93291e-05	0.0258251	1.60696	1	235256910	F								NA	1:235256340-235257699	Unclassified	SNORA14B	NR_002956
cg08455772	-0.116002	-5.98303	9.94349e-05	0.0258282	1.60588	12	54452069	R	FLJ12825	NR_026655	Body	chr12:54454249-54454458	N_Shelf			NA			FLJ12825	NR_026655
cg17421890	-0.102597	-5.98281	9.9466e-05	0.0258282	1.60557	11	66026390	F	KLC2;KLC2;KLC2;KLC2	NM_001134776;NM_022822;NM_001134774;NM_001134775	Body;Body;Body;Body	chr11:66024910-66026253	S_Shore			NA	11:66024667-66026557	Promoter_Associated	KLC2	AK094593
cg00272446	-0.0722268	-5.98216	9.95573e-05	0.0258357	1.60464	1	157164983	R				chr1:157164538-157165135	Island			NA			ETV3	NM_005240
cg09671650	-0.13971	-5.97955	9.9926e-05	0.0259152	1.6009	17	65525235	F	PITPNC1;PITPNC1	NM_181671;NM_012417	Body;Body					TRUE			PITPNC1	NM_012417
cg01991625	-0.108618	-5.97876	0.000100039	0.0259205	1.59977	16	54404353	R								NA			IRX3	NM_024336
cg10055593	-0.133692	-5.97811	0.00010013	0.0259205	1.59884	7	42265817	R	GLI3	NM_000168	5'UTR	chr7:42267546-42267823	N_Shore			NA			GLI3	NM_000168
cg23640701	-0.0882364	-5.97809	0.000100134	0.0259205	1.5988	12	52301634	F	ACVRL1	NM_000020	5'UTR	chr12:52300801-52301583	S_Shore			NA			ACVRL1	NM_000020
cg14548284	-0.129385	-5.97649	0.000100361	0.025953	1.59651	4	10458049	F	ZNF518B	NM_053042	5'UTR	chr4:10458129-10459353	N_Shore			NA			ZNF518B	NM_053042
cg07115262	-0.0616614	-5.97632	0.000100385	0.025953	1.59627	12	52702819	R	KRT86	NM_002284	3'UTR	chr12:52701962-52702560	S_Shore			TRUE	12:52701897-52703001	Unclassified	KRT81	BC031978
cg06206626	-0.0431502	-5.97252	0.000100927	0.0260767	1.59084	22	26825900	R	ASPHD2	NM_020437	5'UTR	chr22:26824978-26825680	S_Shore			NA			ASPHD2	NM_020437
cg01354046	-0.103638	-5.97162	0.000101056	0.026094	1.58954	5	171057339	F				chr5:171057071-171057340	Island			TRUE	5:171056486-171058001	Unclassified_Cell_type_specific	FGF18	NM_003862
cg00962903	-0.0733183	-5.9695	0.00010136	0.026142	1.58651	3	168863028	R	MECOM;MECOM;MECOM;MECOM;MECOM;MECOM	NM_001163999;NM_004991;NM_001105077;NM_001164000;NM_001105078;NM_005241	5'UTR;Body;5'UTR;5'UTR;5'UTR;5'UTR	chr3:168864030-168864449	N_Shore			NA			MECOM	AF164154
cg05239811	-0.154956	-5.96944	0.000101369	0.026142	1.58642	6	31734147	R	C6orf27	NM_025258	Body					NA			SAPCD1	AL122094
cg17804611	-0.0844972	-5.96822	0.000101545	0.0261689	1.58466	2	15804917	R								NA			AK093525	AK093525
cg15138109	-0.0908481	-5.96748	0.000101651	0.0261689	1.5836	2	24713234	F				chr2:24713710-24715168	N_Shore		CDMR	NA			NCOA1	AK226063
cg03465652	-0.148037	-5.96714	0.0001017	0.0261689	1.58312	2	121625735	F	GLI2	NM_005270	Body	chr2:121624827-121625209	S_Shore			TRUE			GLI2	BC111410
cg17775079	-0.0841561	-5.96696	0.000101726	0.0261689	1.58287	10	65224441	R	JMJD1C;LOC84989	NM_032776;NR_027182	Body;TSS1500	chr10:65224870-65225887	N_Shore			NA			LOC84989	NR_027182
cg09240693	-0.135971	-5.96387	0.000102172	0.0262675	1.57844	2	86038538	F				chr2:86038311-86038666	Island			TRUE			LOC284950	NR_038888
cg12324629	-0.158773	-5.96152	0.000102514	0.026339	1.57506	17	19771548	F	ULK2;ULK2	NM_014683;NM_001142610	TSS1500;TSS1500	chr17:19771609-19771814	N_Shore			NA			ULK2	NM_001142610
cg21484940	-0.207782	-5.96071	0.000102632	0.026353	1.5739	7	48129992	R	UPP1;UPP1	NM_181597;NM_003364	5'UTR;5'UTR	chr7:48128046-48128499	S_Shore		RDMR	NA			UPP1	BC053592
cg19242268	-0.134736	-5.95971	0.000102777	0.0263739	1.57248	20	62688573	R	TCEA2;TCEA2	NM_198723;NM_198723	1stExon;5'UTR	chr20:62688551-62688878	Island			TRUE	20:62688571-62689673	Unclassified	TCEA2	NM_198723
cg18059464	-0.0922668	-5.95775	0.000103065	0.0264312	1.56965	10	134915277	R	GPR123	NM_001083909	Body	chr10:134913543-134914039	S_Shore			TRUE			GPR123	NM_001083909
cg07086353	-0.0957126	-5.95666	0.000103223	0.0264556	1.5681	11	64257660	R								NA	11:64257632-64257903	Unclassified	SLC22A11	AK129930
cg07222505	-0.170023	-5.9557	0.000103364	0.0264753	1.56672	5	74161231	F	FAM169A	NM_015566	5'UTR	chr5:74161536-74162716	N_Shore			NA			FAM169A	BX640902
cg04368939	-0.108062	-5.95475	0.000103504	0.0264948	1.56535	10	103588914	R	KCNIP2;KCNIP2;KCNIP2;KCNIP2;KCNIP2;KCNIP2;KCNIP2	NM_173195;NM_173191;NM_173193;NM_173194;NM_173192;NM_014591;NM_173197	Body;Body;Body;Body;Body;Body;Body	chr10:103588913-103589254	Island			NA			KCNIP2	AK295324
cg22713900	-0.131817	-5.94954	0.000104272	0.0266691	1.55788	15	41803592	R	LTK;LTK;LTK	NM_206961;NM_001135685;NM_002344	Body;Body;Body	chr15:41803443-41805531	Island			NA			LTK	BC143903
cg15626350	-0.185953	-5.94926	0.000104314	0.0266691	1.55747	6	152130207	R	ESR1;ESR1;ESR1;ESR1	NM_001122740;NM_001122741;NM_000125;NM_001122742	Body;Body;Body;Body	chr6:152128822-152129771	S_Shore		CDMR	NA			ESR1	AF258450
cg02297043	-0.152337	-5.94613	0.000104779	0.0267714	1.55298	1	75590912	R				chr1:75590817-75591354	Island			NA			LHX8	NM_001001933
cg14738273	-0.0756512	-5.94445	0.00010503	0.026819	1.55056	3	126074601	F	KLF15	NM_014079	5'UTR	chr3:126074783-126076865	N_Shore			TRUE			KLF15	NM_014079
cg07126115	-0.126332	-5.94213	0.000105377	0.0268689	1.54722	12	133028089	R								NA	12:133027888-133028173	Unclassified	FBRSL1	NM_001142641
cg05657792	-0.076556	-5.94158	0.000105459	0.0268689	1.54644	17	6899758	R	ALOX12	NM_000697	Body	chr17:6898820-6900427	Island			TRUE			ALOX12	NM_000697
cg18027683	-0.113496	-5.9414	0.000105486	0.0268689	1.54618	1	86047660	F	CYR61	NM_001554	Body	chr1:86046362-86047240	S_Shore			NA			AL832891	AL832891
cg04850999	-0.163391	-5.94136	0.000105493	0.0268689	1.54612	10	77872084	R	C10orf11	NM_032024	Body	chr10:77872083-77872305	Island			TRUE			Metazoa_SRP	.
cg08415141	-0.0888272	-5.94098	0.00010555	0.0268689	1.54557	6	29598310	R	GABBR1;GABBR1	NM_021904;NM_001470	Body;Body	chr6:29600192-29600661	N_Shore			NA			GABBR1	AF301005
cg21570209	-0.171662	-5.93999	0.000105698	0.0268902	1.54415	19	46367987	R	FOXA3;SYMPK	NM_004497;NM_004819	Body;TSS1500	chr19:46366202-46366605	S_Shore		RDMR	NA	19:46365388-46368224	Promoter_Associated	FOXA3	NM_004497
cg10910512	-0.128992	-5.93942	0.000105784	0.0268955	1.54333	6	112576009	R	LAMA4;LAMA4;LAMA4;LAMA4;LAMA4	NM_001105209;NM_001105206;NM_001105207;NM_002290;NM_001105208	TSS200;TSS200;TSS200;TSS200;TSS200	chr6:112575091-112575483	S_Shore			NA			LAMA4	NM_001105208
cg14794735	-0.124025	-5.93799	0.000105999	0.0269028	1.54128	7	129415968	F	MIR183;MIR96	NR_029615;NR_029512	TSS1500;TSS1500	chr7:129418286-129422509	N_Shelf			NA	7:129415897-129416024	Unclassified_Cell_type_specific	MIR183	NR_029615
cg22075146	-0.114271	-5.93788	0.000106015	0.0269028	1.54112	3	50408111	R	CACNA2D2;CACNA2D2	NM_001005505;NM_006030	Body;Body					NA			Mir_324	.
cg00611789	-0.249626	-5.93775	0.000106035	0.0269028	1.54094	5	78985432	F	CMYA5	NM_153610	TSS1500					TRUE	5:78985346-78985548	Unclassified_Cell_type_specific	CMYA5	NM_153610
cg22190721	-0.155429	-5.9375	0.000106073	0.0269028	1.54058	16	68269295	F	ESRP2	NM_024939	Body	chr16:68269010-68272143	Island		RDMR	NA	16:68268909-68269458	Unclassified_Cell_type_specific	ESRP2	AK025571
cg25748764	-0.0529758	-5.93455	0.000106519	0.0269995	1.53633	20	31261814	F	LOC284805	NR_026959	TSS200					TRUE	20:31261731-31262997	Unclassified	C20orf203	GU931819
cg12968224	-0.0994995	-5.93285	0.000106777	0.0270483	1.53389	3	127899140	R	EEFSEC	NM_021937	Body					TRUE			RUVBL1	AK092163
cg09050461	-0.0749248	-5.93173	0.000106948	0.0270751	1.53227	5	180072420	F	FLT4;FLT4	NM_002020;NM_182925	Body;Body	chr5:180075688-180076906	N_Shelf			NA			FLT4	EU826566
cg14214165	-0.142965	-5.93117	0.000107033	0.0270801	1.53146	2	218777482	R	TNS1	NM_022648	5'UTR					TRUE			TNS1	AK310169
cg26572811	-0.118297	-5.92734	0.000107618	0.0272115	1.52595	17	14206901	F	HS3ST3B1;MGC12916	NM_006041;NR_026880	Body;TSS200	chr17:14204168-14207702	Island		CDMR	NA	17:14205319-14207043	Promoter_Associated	MGC12916	NR_026880
cg16084014	-0.0916922	-5.92609	0.000107809	0.0272431	1.52416	7	114585003	F	MDFIC;MDFIC	NM_199072;NM_001166345	Body;Body					TRUE			MDFIC	BC040713
cg09096031	-0.139706	-5.92527	0.000107935	0.0272517	1.52298	2	198540569	F	RFTN2;RFTN2	NM_144629;NM_144629	1stExon;5'UTR					NA			RFTN2	NM_144629
cg23345697	-0.116937	-5.92486	0.000107999	0.0272517	1.52238	7	520489	R				chr7:516717-516974	S_Shelf			TRUE			PDGFA	BC109246
cg10287485	-0.116348	-5.92459	0.00010804	0.0272517	1.522	11	69473145	R				chr11:69468810-69469152	S_Shelf			TRUE			BC133018	BC133018
cg20307496	-0.0785466	-5.92249	0.000108364	0.0273167	1.51897	22	37955927	R	CDC42EP1	NM_152243	TSS1500	chr22:37956102-37957926	N_Shore		DMR	NA	22:37955899-37956238	Unclassified_Cell_type_specific	CDC42EP1	NM_152243
cg18848959	-0.0688703	-5.9208	0.000108624	0.0273638	1.51655	20	60638814	F	TAF4	NM_003185	Body	chr20:60638612-60638982	Island			TRUE	20:60637939-60640028	Promoter_Associated	TAF4	NM_003185
cg02951357	-0.163106	-5.92042	0.000108683	0.0273638	1.516	1	59280619	F				chr1:59280951-59281194	N_Shore			TRUE			LOC100131060	NR_034014
cg22871318	-0.150216	-5.91857	0.000108971	0.0274073	1.51333	12	42982419	F	PRICKLE1	NM_153026	5'UTR	chr12:42982832-42983881	N_Shore		RDMR	NA	12:42982369-42983218	Unclassified_Cell_type_specific	PRICKLE1	AF543760
cg25937577	-0.146786	-5.91784	0.000109084	0.0274073	1.51228	22	31536476	R	PLA2G3	NM_015715	TSS200					TRUE	22:31536121-31536683	Unclassified	PLA2G3	NM_015715
cg01966117	-0.125456	-5.91766	0.000109113	0.0274073	1.51201	3	52528714	F	STAB1	NM_015136	TSS1500					TRUE			STAB1	NM_015136
cg13560901	-0.135429	-5.9176	0.000109121	0.0274073	1.51194	7	28998540	F	TRIL	NM_014817	TSS1500	chr7:28995305-28998541	Island			NA			DQ601810	DQ601810
cg08311343	-0.172588	-5.91521	0.000109494	0.027476	1.50849	7	92324861	R	CDK6;CDK6	NM_001259;NM_001145306	Body;Body					TRUE			FAM133B	NM_152789
cg27278843	-0.0847892	-5.91499	0.000109529	0.027476	1.50817	2	74215176	R				chr2:74211214-74212314	S_Shelf		CDMR	NA	2:74214468-74215207	Promoter_Associated	5S_rRNA	.
cg19216792	-0.113822	-5.91457	0.000109593	0.027476	1.50757	7	26897202	F	SKAP2	NM_003930	Body					NA			SKAP2	AK299317
cg18432895	-0.121388	-5.91372	0.000109726	0.0274928	1.50634	8	29205555	F	DUSP4;DUSP4;DUSP4	NM_001394;NM_057158;NM_057158	Body;5'UTR;1stExon	chr8:29205664-29209847	N_Shore		RDMR	NA	8:29204770-29205630	Unclassified	DUSP4	NM_057158
cg00576435	-0.0902751	-5.91292	0.000109851	0.0275074	1.5052	20	36149188	F	BLCAP;BLCAP;BLCAP;BLCAP;NNAT;NNAT;BLCAP	NM_001167821;NM_001167820;NM_001167822;NM_006698;NM_181689;NM_005386;NM_001167823	5'UTR;5'UTR;5'UTR;5'UTR;TSS1500;TSS1500;5'UTR	chr20:36148603-36150136	Island			NA			NNAT	NM_181689
cg18091083	-0.169966	-5.91188	0.000110015	0.0275181	1.50369	17	78819092	F	RPTOR;RPTOR	NM_001163034;NM_020761	Body;Body	chr17:78818440-78818696	S_Shore			NA			RPTOR	BC033699
cg09586838	-0.105416	-5.9118	0.000110027	0.0275181	1.50358	5	82297924	R								TRUE			SCARNA18	NR_003139
cg23360101	-0.0911067	-5.91088	0.000110172	0.0275377	1.50225	8	858591	F							RDMR	TRUE			BC038783	BC038783
cg08632420	-0.163193	-5.90741	0.000110718	0.0276365	1.49725	16	19117471	F								TRUE			ITPRIPL2	NM_001034841
cg20886011	-0.162582	-5.90714	0.000110762	0.0276365	1.49685	2	165479150	F	GRB14	NM_004490	TSS1500	chr2:165477562-165478342	S_Shore			NA			GRB14	NM_004490
cg09453076	-0.0669737	-5.90684	0.000110808	0.0276365	1.49643	2	235406275	F	ARL4C	NM_005737	TSS1500	chr2:235404502-235406541	Island		DMR	NA	2:235405028-235406635	Promoter_Associated_Cell_type_specific	ARL4C	NM_005737
cg06808305	-0.144901	-5.90656	0.000110853	0.0276365	1.49602	2	63270824	F	EHBP1;EHBP1;EHBP1;EHBP1	NM_001142616;NM_001142615;NM_001142614;NM_015252	Body;Body;Body;Body	chr2:63272127-63272409	N_Shore			NA			LOC100132215	NR_027069
cg01798157	-0.101112	-5.90626	0.0001109	0.0276365	1.49559	1	203276595	F	BTG2	NM_006763	3'UTR	chr1:203274305-203275338	S_Shore			NA	1:203276430-203276637	Promoter_Associated	BTG2	NM_006763
cg20071744	-0.163986	-5.90274	0.000111458	0.0277588	1.49051	8	141057329	F	TRAPPC9;TRAPPC9	NM_001160372;NM_031466	Body;Body	chr8:141057284-141057521	Island			NA			AX748239	AX748239
cg06707236	-0.168554	-5.90193	0.000111588	0.0277693	1.48934	19	911965	R	C19orf22	NM_138774	Body	chr19:911689-911996	Island			NA			R3HDM4	NM_138774
cg14896134	-0.1094	-5.90143	0.000111667	0.0277693	1.48862	10	88295386	R				chr10:88295205-88295592	Island			TRUE	10:88295328-88295592	Unclassified_Cell_type_specific	WAPAL	BC140858
cg14120049	-0.231414	-5.90083	0.000111763	0.0277693	1.48775	19	36246408	R	HSPB6	NM_144617	3'UTR	chr19:36246328-36247982	Island	high-CpG:40938163-40938256		NA	19:36246363-36247460	Unclassified_Cell_type_specific	AJ278121	AJ278121
cg26145504	-0.0851086	-5.90079	0.000111769	0.0277693	1.4877	11	115801162	F								TRUE			LOC283143	AK309234
cg07503785	-0.115429	-5.89976	0.000111934	0.0277938	1.4862	11	76033473	F				chr11:76032911-76033392	S_Shore			TRUE			PRKRIR	AK001522
cg09982773	-0.195684	-5.89744	0.000112305	0.0278691	1.48286	7	128550860	F	KCP;KCP	NM_001135914;NM_199349	TSS200;TSS200	chr7:128550409-128550903	Island			NA	7:128550741-128551016	Unclassified_Cell_type_specific	KCP	NM_001135914
cg03345454	-0.265162	-5.89661	0.000112438	0.0278856	1.48166	2	202901428	R	FZD7;FZD7	NM_003507;NM_003507	1stExon;3'UTR	chr2:202897386-202901046	S_Shore			NA			FZD7	NM_003507
cg13799242	-0.173972	-5.89402	0.000112855	0.0279315	1.47792	6	126072671	F	HEY2	NM_012259	Body	chr6:126068722-126071320	S_Shore			TRUE			HEY2	NM_012259
cg05360714	-0.11416	-5.89392	0.000112871	0.0279315	1.47778	17	75543046	R						low-CpG:73054614-73054649		NA			LOC100507351	NR_040050
cg06716730	-0.188036	-5.89373	0.000112901	0.0279315	1.47751	17	35851459	R	DUSP14	NM_007026	5'UTR	chr17:35849290-35850483	S_Shore		RDMR	NA	17:35851034-35851616	Promoter_Associated	DUSP14	NM_007026
cg15677080	-0.0529984	-5.89364	0.000112916	0.0279315	1.47737	7	1734117	F								TRUE			LOC401296	AK125766
cg04251208	-0.114956	-5.89336	0.000112961	0.0279315	1.47697	19	3458194	F	NFIC;NFIC	NM_005597;NM_205843	Body;Body	chr19:3456182-3456581	S_Shore			TRUE			C19orf77	NM_001136503
cg21849552	-0.0800671	-5.89278	0.000113055	0.0279339	1.47613	3	14597650	R				chr3:14597400-14597651	Island			TRUE			GRIP2	NM_001080423
cg10531073	-0.139446	-5.89247	0.000113106	0.0279339	1.47568	22	38485757	F	BAIAP2L2	NM_025045	Body	chr22:38484615-38485721	S_Shore			TRUE			BAIAP2L2	AK026263
cg11795276	-0.110201	-5.89137	0.000113282	0.0279609	1.4741	12	54454252	R	FLJ12825	NR_026655	Body	chr12:54454249-54454458	Island			TRUE			FLJ12825	NR_026655
cg08862148	-0.0507039	-5.89088	0.000113362	0.0279638	1.47339	6	29595315	R	GABBR1;GABBR1;GABBR1	NM_021904;NM_021903;NM_001470	Body;1stExon;Body	chr6:29595298-29595795	Island			NA			GABBR1	NM_021903
cg03866600	-0.13541	-5.89003	0.0001135	0.0279699	1.47216	11	69001551	R								NA			MYEOV	AK000473
cg01869233	-0.0956127	-5.8899	0.000113521	0.0279699	1.47197	20	6035139	F	LRRN4	NM_152611	TSS1500	chr20:6032675-6033517	S_Shore			NA			LRRN4	AK172833
cg24101337	-0.105911	-5.88783	0.000113857	0.0280359	1.46898	19	2493740	R				chr19:2494095-2495214	N_Shore			NA			GADD45B	AY615270
cg26816907	-0.124843	-5.88693	0.000114005	0.0280377	1.46767	1	197890812	R	LHX9;LHX9	NM_020204;NM_001014434	Body;Body	chr1:197890478-197890824	Island		RDMR	NA			LHX9	NM_020204
cg10892403	-0.101343	-5.88673	0.000114037	0.0280377	1.46739	11	62676929	F	CHRM1	NM_000738	3'UTR					TRUE			CHRM1	CCDS8040
cg13399544	-0.0919261	-5.88654	0.000114067	0.0280377	1.46712	8	144649678	R	C8orf73	NM_001100878	Body	chr8:144649331-144649742	Island			NA	8:144649673-144650030	Gene_Associated_Cell_type_specific	C8orf73	BC128444
cg26537280	-0.128101	-5.88562	0.000114218	0.0280581	1.46578	1	95699037	R	RWDD3;RWDD3	NM_001128142;NM_015485	TSS1500;TSS1500	chr1:95699725-95700142	N_Shore			NA	1:95698735-95700504	Promoter_Associated	AK090700	AK090700
cg10950358	-0.115748	-5.88303	0.000114642	0.0281414	1.46204	1	147253401	R								TRUE			GJA5	NM_005266
cg24129115	-0.174635	-5.88248	0.000114731	0.0281414	1.46125	14	23352488	F	REM2;REM2	NM_173527;NM_173527	1stExon;5'UTR	chr14:23355738-23356402	N_Shelf			TRUE			REM2	AK299238
cg20976787	-0.170033	-5.8823	0.000114761	0.0281414	1.46099	6	43064460	R	PTK7;PTK7;PTK7;PTK7	NM_002821;NM_152881;NM_152882;NM_152880	Body;Body;Body;Body					TRUE	6:43064384-43064488	Unclassified_Cell_type_specific	PTK7	AK296953
cg13003311	-0.137616	-5.88154	0.000114887	0.0281555	1.45988	5	89853284	F	GPR98;GPR98	NM_032119;NR_003149	TSS1500;TSS1500	chr5:89854290-89854956	N_Shore		RDMR	NA			GPR98	NM_032119
cg09000832	-0.0866509	-5.88003	0.000115134	0.0281996	1.4577	13	50703589	F				chr13:50703685-50705025	N_Shore		RDMR	NA	13:50702745-50703962	Unclassified_Cell_type_specific	DLEU2	NR_002612
cg06949812	-0.102543	-5.87795	0.000115477	0.0282552	1.45469	17	38517993	F	GJD3;GJD3	NM_152219;NM_152219	1stExon;3'UTR	chr17:38518965-38520264	N_Shore			NA			GJD3	BC153089
cg09459982	-0.0743314	-5.87783	0.000115498	0.0282552	1.45451	6	33386556	F	CUTA;CUTA;SYNGAP1;CUTA;CUTA;CUTA	NM_015921;NM_001014837;NM_006772;NM_001014838;NM_001014840;NM_001014433	TSS1500;TSS1500;TSS1500;TSS1500;TSS1500;TSS1500	chr6:33385678-33386262	S_Shore			NA	6:33385034-33386783	Promoter_Associated	CUTA	NM_001014433
cg19008597	-0.109388	-5.87669	0.000115685	0.0282843	1.45288	12	25102431	R	BCAT1	NM_005504	TSS200	chr12:25101607-25102073	S_Shore			NA	12:25101345-25102494	Promoter_Associated	BCAT1	NM_005504
cg25112877	-0.100852	-5.87601	0.000115798	0.0282924	1.45189	2	159702723	R								TRUE			TRNA_Pseudo	.
cg06864789	-0.07947	-5.87562	0.000115864	0.0282924	1.45132	6	139012992	F				chr6:139013563-139014881	N_Shore			NA	6:139012853-139014693	Unclassified	FLJ46906	BC104461
cg09363342	-0.121643	-5.87526	0.000115923	0.0282924	1.4508	4	1765091	F				chr4:1765009-1765508	Island			NA	4:1764322-1765773	Unclassified	FGFR3	AB209441
cg10676327	-0.26153	-5.8742	0.0001161	0.0283187	1.44926	4	6659735	R				chr4:6659271-6659787	Island			NA	4:6659732-6659835	Unclassified_Cell_type_specific	LOC93622	BC021542
cg04154290	-0.0964123	-5.87257	0.000116371	0.028363	1.4469	1	53794211	F	LRP8;LRP8;LRP8;LRP8	NM_033300;NM_017522;NM_001018054;NM_004631	TSS1500;TSS1500;TSS1500;TSS1500	chr1:53791687-53793496	S_Shore			NA			AK097571	AK097571
cg20167366	-0.218043	-5.87206	0.000116456	0.028363	1.44617	6	30094980	R				chr6:30095173-30095610	N_Shore			NA			DQ580846	DQ580846
cg09438075	-0.107698	-5.87172	0.000116512	0.028363	1.44568	13	44359415	R	ENOX1	NM_017993	5'UTR	chr13:44359858-44361696	N_Shore			NA			ENOX1	NM_001242863
cg10321236	-0.136506	-5.87146	0.000116555	0.028363	1.4453	11	76849101	R	MYO7A;MYO7A;MYO7A	NM_000260;NM_001127180;NM_001127179	Body;Body;Body	chr11:76849067-76849565	Island			NA			MYO7A	NM_001127179
cg09655403	-0.193231	-5.86945	0.000116891	0.028428	1.44239	5	78985495	R	CMYA5	NM_153610	TSS200			high-CpG:79021199-79021441		TRUE	5:78985346-78985548	Unclassified_Cell_type_specific	CMYA5	NM_153610
cg06663317	-0.10293	-5.86874	0.000117009	0.0284402	1.44137	16	56641101	F	MT2A	NM_005953	TSS1500	chr16:56642129-56642595	N_Shore		RDMR	TRUE	16:56640918-56641506	Unclassified_Cell_type_specific	MT1A	AY077636
cg20273260	-0.115432	-5.86552	0.00011755	0.0285548	1.43671	2	133429169	F	LYPD1;LYPD1	NM_144586;NM_001077427	TSS1500;TSS200	chr2:133426652-133428870	S_Shore			NA			LYPD1	NM_001077427
cg13740709	-0.100955	-5.8645	0.000117723	0.0285645	1.43522	3	128712555	R	KIAA1257	NM_020741	5'UTR	chr3:128712404-128713058	Island			TRUE	3:128712039-128713654	Unclassified	KIAA1257	AK056377
cg02257791	-0.0688702	-5.86447	0.000117728	0.0285645	1.43518	14	22217085	F								NA			TCRVA15	S60795
cg22378853	-0.0859813	-5.86243	0.000118072	0.0286313	1.43222	20	36148154	F	BLCAP;BLCAP;BLCAP;BLCAP;NNAT;NNAT;BLCAP	NM_001167821;NM_001167820;NM_001167822;NM_006698;NM_181689;NM_005386;NM_001167823	5'UTR;5'UTR;5'UTR;5'UTR;TSS1500;TSS1500;5'UTR	chr20:36148603-36150136	N_Shore			NA	20:36147843-36148339	Unclassified_Cell_type_specific	BLCAP	CCDS13295
cg01877606	-0.0589887	-5.8612	0.00011828	0.0286648	1.43045	4	54457746	F	LNX1	NM_001126328	TSS200			low-CpG:54152409-54152522		TRUE			LNX1	NM_001126328
cg10599948	-0.0838193	-5.86067	0.00011837	0.0286698	1.42968	19	49244571	R	IZUMO1;RASIP1	NM_182575;NM_017805	Body;TSS1500	chr19:49242018-49242962	S_Shore		RDMR	NA	19:49244503-49245000	Unclassified_Cell_type_specific	RASIP1	NM_017805
cg27070902	-0.102884	-5.85882	0.000118684	0.0287292	1.427	11	44750083	R				chr11:44748205-44749761	S_Shore			TRUE	11:44749123-44750472	Promoter_Associated	TSPAN18	NM_130783
cg26875665	-0.115158	-5.85806	0.000118813	0.0287342	1.4259	1	160340708	R	NHLH1	NM_005598	Body	chr1:160340604-160340843	Island			NA			NHLH1	CCDS1204
cg24931658	-0.0869798	-5.85744	0.00011892	0.0287342	1.42499	8	21914524	F	EPB49;EPB49;EPB49;EPB49	NM_001114135;NM_001114136;NM_001114139;NM_001114137	TSS1500;5'UTR;5'UTR;5'UTR	chr8:21914275-21914525	Island			NA			EPB49	NM_001114135
cg13348944	-0.120225	-5.85695	0.000119002	0.0287342	1.42429	11	118047121	F	SCN2B	NM_004588	1stExon					NA			SCN2B	NM_004588
cg14853974	-0.104162	-5.85684	0.000119021	0.0287342	1.42413	17	8218887	R	ARHGEF15	NM_173728	Body					TRUE			ARHGEF15	AK300327
cg09616559	-0.115195	-5.85666	0.000119052	0.0287342	1.42387	2	25921151	F								TRUE			Y_RNA	.
cg02904657	-0.20237	-5.85591	0.00011918	0.0287478	1.42278	15	40571997	F				chr15:40572078-40572758	N_Shore			TRUE	15:40571047-40572291	Unclassified	ANKRD63	NM_001190479
cg06049171	-0.0526507	-5.85552	0.000119247	0.0287478	1.42221	15	69126265	F	MIR548H4	NR_031680	Body					TRUE	15:69126263-69126703	Unclassified_Cell_type_specific	MIR548H4	NR_031680
cg16922753	-0.116012	-5.8548	0.000119371	0.028756	1.42116	8	1113291	R				chr8:1113058-1114073	Island			NA			LOC286083	NR_033895
cg10444806	-0.169214	-5.85451	0.00011942	0.028756	1.42075	17	38084428	F	ORMDL3	NM_139280	TSS1500	chr17:38083226-38084052	S_Shore			NA	17:38084352-38084667	Promoter_Associated	ORMDL3	NM_139280
cg06167719	-0.153719	-5.85358	0.000119579	0.0287771	1.4194	21	38362727	F	HLCS	NM_000411	TSS200	chr21:38362015-38362868	Island	high-CpG:37284351-37284750		NA	21:38361807-38363195	Promoter_Associated	HLCS	NM_000411
cg07355189	-0.201285	-5.85289	0.000119698	0.0287771	1.41839	10	45923374	F	ALOX5	NM_000698	Body	chr10:45922831-45923375	Island			NA			DL492557	DL492557
cg06614754	-0.0659355	-5.85279	0.000119716	0.0287771	1.41825	13	107569395	R				chr13:107570191-107570671	N_Shore			NA			ARGLU1	NM_018011
cg21619325	-0.0516887	-5.84964	0.000120256	0.0288903	1.41369	2	19559211	F	OSR1	NM_145260	TSS1500	chr2:19560963-19561650	N_Shore		RDMR	NA			OSR1	NM_145260
cg09134760	-0.15874	-5.84795	0.000120549	0.0289391	1.41123	5	60921084	F				chr5:60921534-60922472	N_Shore			TRUE			BC032910	BC032910
cg15955655	-0.108644	-5.84758	0.000120613	0.0289391	1.41069	21	45705267	F	AIRE	NM_000383	TSS1500	chr21:45705428-45706044	N_Shore			NA			AIRE	NM_000383
cg22012981	-0.0716651	-5.84726	0.000120669	0.0289391	1.41022	3	58522689	R	ACOX2	NM_003500	5'UTR					TRUE			ACOX2	NM_003500
cg11541486	-0.0838802	-5.8462	0.000120853	0.0289663	1.40869	17	72358055	R	BTBD17	NM_001080466	TSS200	chr17:72356096-72356327	S_Shore			TRUE			BTBD17	NM_001080466
cg23682609	-0.100779	-5.84263	0.000121474	0.0290983	1.4035	20	52687365	R	BCAS1	NM_003657	TSS200					NA			BCAS1	AK304213
cg14942906	-0.160149	-5.84126	0.000121713	0.0291345	1.40151	11	67384040	R				chr11:67383537-67383809	S_Shore			TRUE			DOC2GP	NR_033791
cg04308185	-0.182347	-5.84096	0.000121765	0.0291345	1.40108	17	38084377	R	ORMDL3	NM_139280	TSS1500	chr17:38083226-38084052	S_Shore			NA	17:38084352-38084667	Promoter_Associated	ORMDL3	NM_139280
cg19045002	-0.261361	-5.8399	0.000121949	0.0291616	1.39955	17	79380585	R	BAHCC1	NM_001080519	Body	chr17:79380359-79380723	Island			NA			MIR4740	NR_039894
cg24490133	-0.137543	-5.83901	0.000122106	0.0291815	1.39825	1	245607970	R	KIF26B	NM_018012	Body					NA			KIF26B	BC035896
cg24100671	-0.105628	-5.83863	0.000122173	0.0291815	1.3977	5	10551547	R								TRUE			ANKRD33B	NM_001164440
cg23575603	-0.172205	-5.83808	0.000122269	0.0291876	1.3969	13	50707753	R				chr13:50707585-50708019	Island			TRUE			DLEU2	NR_002612
cg15151749	-0.100981	-5.8376	0.000122353	0.0291908	1.39621	11	17520223	R	USH1C;USH1C	NM_153676;NM_005709	Body;Body					TRUE	11:17520077-17520315	Unclassified_Cell_type_specific	ABCC8	NM_000352
cg19893585	-0.157851	-5.83718	0.000122427	0.0291916	1.3956	8	145025064	R	PLEC1;PLEC1;PLEC1;PLEC1	NM_000445;NM_201378;NM_201379;NM_201380	Body;Body;Body;TSS200	chr8:145024449-145025179	Island			NA			PLEC	NM_201380
cg07097417	-0.169896	-5.8367	0.000122512	0.0291951	1.39489	1	212002770	R	LPGAT1	NM_014873	5'UTR	chr1:212003431-212004280	N_Shore			NA	1:212002627-212003176	Promoter_Associated_Cell_type_specific	LPGAT1	BC034621
cg17164151	0.0799332	5.83614	0.00012261	0.0291951	1.39409	10	134826077	R				chr10:134826130-134826843	N_Shore			NA			AK125849	AK125849
cg22981993	-0.126522	-5.8359	0.000122653	0.0291951	1.39373	2	202484029	F	ALS2CR11;ALS2CR11;ALS2CR11;ALS2CR11	NM_152525;NM_001168221;NM_001168216;NM_001168217	TSS200;TSS200;TSS200;TSS200	chr2:202483584-202483957	S_Shore			TRUE			ALS2CR11	NM_001168221
cg26817546	-0.120604	-5.83427	0.000122939	0.0292464	1.39137	5	135538704	F								TRUE			LOC389332	NR_024418
cg12080906	-0.169073	-5.83384	0.000123016	0.0292478	1.39075	1	156646065	F	NES	NM_006617	Body	chr1:156646292-156647260	N_Shore			NA	1:156646042-156646103	Unclassified_Cell_type_specific	NES	NM_006617
cg12910797	-0.0715097	-5.83314	0.000123139	0.0292604	1.38973	17	46651722	F	HOXB3;HOXB3	NM_002146;NM_002146	5'UTR;1stExon	chr17:46654053-46654369	N_Shelf			NA			HOXB3	NM_002146
cg11822175	-0.0667954	-5.83201	0.000123341	0.0292847	1.38808	10	102637177	F								NA			FAM178A	NM_018121
cg09893305	-0.163838	-5.83177	0.000123383	0.0292847	1.38773	5	83017184	R	HAPLN1	NM_001884	TSS1500	chr5:83017894-83018358	N_Shore			NA			HAPLN1	NM_001884
cg10519417	-0.161592	-5.8298	0.000123732	0.0293378	1.38488	17	14201321	F				chr17:14201726-14202052	N_Shore		RDMR	NA			HS3ST3B1	NM_006041
cg04091702	-0.135295	-5.82971	0.000123748	0.0293378	1.38474	5	68711640	R	MARVELD2;MARVELD2	NM_001038603;NM_144724	5'UTR;5'UTR	chr5:68710807-68711520	S_Shore		RDMR	NA	5:68710594-68712104	Unclassified_Cell_type_specific	MARVELD2	NM_001038603
cg14785609	-0.119975	-5.82811	0.000124034	0.0293887	1.38241	1	157948816	F				chr1:157948720-157949053	Island			NA			KIRREL	AK297788
cg19567594	-0.124715	-5.827	0.000124232	0.0294188	1.38079	11	10715175	R	MRVI1;MRVI1;MRVI1;MRVI1;MRVI1	NM_001100163;NM_001100163;NM_130385;NM_130385;NM_001100167	1stExon;5'UTR;1stExon;5'UTR;TSS200			low-CpG:10671608-10672092		TRUE			MRVI1	NM_001100167
cg24670715	-0.126433	-5.82575	0.000124455	0.029429	1.37898	8	6420506	R	ANGPT2;ANGPT2;ANGPT2;ANGPT2;ANGPT2;ANGPT2;MCPH1	NM_001118888;NM_001147;NM_001118887;NM_001118888;NM_001147;NM_001118887;NM_024596	5'UTR;1stExon;5'UTR;1stExon;5'UTR;1stExon;Body	chr8:6424215-6424888	N_Shelf			TRUE	8:6420381-6420930	Unclassified_Cell_type_specific	ANGPT2	AK310171
cg03353445	-0.095332	-5.82568	0.000124468	0.029429	1.37888	12	13043502	R	GPRC5A	NM_003979	TSS1500	chr12:13044042-13044667	N_Shore			NA			GPRC5A	NM_003979
cg07528595	-0.102598	-5.82527	0.00012454	0.029429	1.37829	12	54814557	F				chr12:54812702-54813191	S_Shore			TRUE			ITGA5	NM_002205
cg10115348	-0.124636	-5.82517	0.000124559	0.029429	1.37813	1	17865653	R	ARHGEF10L	NM_018125	TSS1500	chr1:17865863-17866630	N_Shore			NA			ARHGEF10L	NM_018125
cg19405883	-0.0649415	-5.82367	0.000124827	0.0294754	1.37596	5	34687565	F	RAI14;RAI14;RAI14;RAI14;RAI14;RAI14	NM_001145523;NM_001145520;NM_001145525;NM_001145521;NM_015577;NM_001145522	TSS200;Body;5'UTR;Body;Body;Body					NA			RAI14	NM_001145523
cg09174411	-0.0911579	-5.82105	0.000125299	0.0295701	1.37214	12	107792027	F	BTBD11	NM_001018072	Body					TRUE			BTBD11	AK124835
cg19379572	-0.0623292	-5.81973	0.000125536	0.0296092	1.37023	12	42876523	R	PRICKLE1;PRICKLE1;PRICKLE1;PRICKLE1	NM_153026;NM_001144881;NM_001144882;NM_001144883	5'UTR;5'UTR;5'UTR;5'UTR	chr12:42876654-42878193	N_Shore			NA	12:42876032-42878260	Unclassified	PRICKLE1	NM_001144881
cg02341556	-0.125646	-5.81859	0.000125744	0.0296388	1.36856	11	118781978	F	BCL9L	NM_182557	TSS1500	chr11:118781060-118781732	S_Shore			NA			BCL9L	NM_182557
cg21913725	-0.0912026	-5.81825	0.000125805	0.0296388	1.36806	7	41012616	F								TRUE			C7orf10	AF086161
cg05624930	-0.182689	-5.81713	0.000126008	0.0296698	1.36643	6	52172005	F				chr6:52171922-52172147	Island			NA			MCM3	AK300754
cg10777461	-0.197762	-5.81621	0.000126175	0.029692	1.3651	1	10590481	R	PEX14	NM_004565	Body					NA			PEX14	AK307462
cg23251761	-0.188966	-5.81533	0.000126334	0.0297128	1.36382	1	9750061	R	PIK3CD	NM_005026	5'UTR	chr1:9749295-9750228	Island			NA	1:9748906-9750306	Unclassified	PIK3CD	JN190435
cg07302677	-0.13783	-5.81388	0.000126598	0.0297579	1.36171	7	128550862	F	KCP;KCP	NM_001135914;NM_199349	TSS200;TSS200	chr7:128550409-128550903	Island			NA	7:128550741-128551016	Unclassified_Cell_type_specific	KCP	NM_001135914
cg03589001	-0.139499	-5.81314	0.000126734	0.0297728	1.36063	15	79164714	R	MORF4L1;MORF4L1	NM_206839;NM_006791	TSS1500;TSS1500	chr15:79165102-79166057	N_Shore			NA			MORF4L1	NM_006791
cg00524708	-0.198307	-5.81227	0.000126892	0.0297931	1.35937	16	31159558	F	PRSS36	NM_173502	Body	chr16:31159576-31160009	N_Shore			NA			PRSS36	AK297997
cg15403198	-0.0777719	-5.81187	0.000126966	0.0297936	1.35878	6	41410759	R				chr6:41410589-41411140	Island			NA	6:41410207-41411550	Unclassified	DQ141194	DQ141194
cg03314569	-0.10054	-5.81143	0.000127047	0.0297957	1.35813	1	32041732	F	TINAGL1	NM_022164	TSS1500					NA	1:32041676-32041808	Unclassified_Cell_type_specific	TINAGL1	NM_001204414
cg26747290	-0.0946635	-5.80972	0.000127359	0.0298513	1.35565	16	49888100	F				chr16:49888474-49893354	N_Shore			NA			ZNF423	NM_015069
cg12817840	-0.0524641	-5.80935	0.000127428	0.0298513	1.3551	5	124070989	F	ZNF608	NM_020747	Body					TRUE			ZNF608	BC131507
cg27269488	-0.101626	-5.80721	0.000127821	0.0299265	1.35198	3	191048411	F	UTS2D;CCDC50;CCDC50	NM_198152;NM_178335;NM_174908	TSS200;Body;Body	chr3:191046948-191047710	S_Shore			NA			UTS2D	NM_198152
cg17894088	-0.10468	-5.80666	0.000127921	0.029933	1.35119	8	136470817	F	KHDRBS3	NM_006558	Body	chr8:136468939-136470342	S_Shore			NA			KHDRBS3	NM_006558
cg19530281	-0.105952	-5.80418	0.000128379	0.0300232	1.34758	8	1113432	F				chr8:1113058-1114073	Island			NA			LOC286083	NR_033895
cg18045195	-0.121488	-5.80311	0.000128578	0.0300473	1.34602	2	45178950	F				chr2:45179364-45180394	N_Shore		RDMR	NA	2:45178423-45180272	Unclassified	SIX3	NM_005413
cg14652095	-0.15435	-5.80284	0.000128627	0.0300473	1.34562	6	26018185	F	HIST1H1A	NM_005325	TSS200	chr6:26020671-26021125	N_Shelf			NA	6:26017387-26018636	Promoter_Associated	HIST1H1A	NM_005325
cg14348540	-0.103478	-5.80167	0.000128844	0.0300773	1.34392	8	22224272	F	SLC39A14;SLC39A14;SLC39A14;SLC39A14	NM_001135154;NM_015359;NM_001128431;NM_001135153	TSS1500;TSS1500;TSS1500;TSS1500	chr8:22224519-22225244	N_Shore		RDMR	NA	8:22223934-22225986	Promoter_Associated	SLC39A14	NM_001135154
cg01847441	-0.106729	-5.80137	0.000128901	0.0300773	1.34348	14	69431073	F	ACTN1;ACTN1;ACTN1	NM_001130004;NM_001102;NM_001130005	Body;Body;Body					TRUE			ACTN1	AK298496
cg00091064	-0.151872	-5.79961	0.000129227	0.0301203	1.34092	6	41376604	F				chr6:41376590-41377167	Island		RDMR	NA			NCR2	NM_001199509
cg20480274	-0.149996	-5.79896	0.000129349	0.0301203	1.33996	17	27313125	F	SEZ6;SEZ6	NM_001098635;NM_178860	Body;Body	chr17:27312969-27313283	Island			TRUE			SEZ6	AK096473
cg26276327	-0.103756	-5.79891	0.000129357	0.0301203	1.3399	1	247511469	F								NA			ZNF496	NM_032752
cg20422417	-0.152862	-5.79881	0.000129376	0.0301203	1.33975	2	25427108	R				chr2:25427101-25427577	Island			NA			POMC	BC065832
cg16675054	-0.0457875	-5.79812	0.000129505	0.0301334	1.33874	5	171616574	F	STK10	NM_005990	TSS1500	chr5:171614430-171615939	S_Shore		RDMR	NA	5:171615117-171616622	Promoter_Associated	STK10	NM_005990
cg04818845	-0.092575	-5.79694	0.000129725	0.0301519	1.33702	1	6580167	R	PLEKHG5	NM_198681	TSS200					TRUE			PLEKHG5	BC036671
cg08549810	-0.157755	-5.79687	0.000129739	0.0301519	1.33692	1	86861232	F	ODF2L;ODF2L	NM_020729;NM_001007022	5'UTR;5'UTR	chr1:86861566-86862083	N_Shore			NA			ODF2L	AK308351
cg00947878	-0.204825	-5.79651	0.000129806	0.0301519	1.3364	16	57832005	R	KIFC3;KIFC3;KIFC3	NM_001130099;NM_005550;NM_001130100	TSS200;Body;Body	chr16:57835955-57836989	N_Shelf			NA			KIFC3	NM_001130099
cg19414980	-0.121211	-5.79614	0.000129876	0.0301519	1.33585	7	92673176	R				chr7:92672789-92673016	S_Shore			NA			SAMD9	CCDS34680
cg18729298	-0.163436	-5.7954	0.000130014	0.0301671	1.33477	11	2555203	R	KCNQ1;KCNQ1	NM_000218;NM_181798	Body;Body	chr11:2555405-2555618	N_Shore			TRUE			KCNQ1	AK129678
cg03231735	-0.0847287	-5.79424	0.000130232	0.0302006	1.33309	16	9184099	R	C16orf72	NM_014117	TSS1500	chr16:9184146-9186689	N_Shore			NA			C16orf72	NM_014117
cg20925954	-0.145729	-5.79379	0.000130316	0.0302033	1.33243	10	112256640	F	DUSP5	NM_004419	TSS1500	chr10:112257163-112258684	N_Shore			NA			DUSP5	NM_004419
cg26904169	-0.129142	-5.79301	0.000130463	0.0302205	1.33129	7	89839865	R	STEAP2;STEAP2	NM_152999;NM_001040665	TSS1500;TSS1500	chr7:89840813-89841491	N_Shore		CDMR	NA			STEAP2	NM_152999
cg00398420	-0.103106	-5.79238	0.000130582	0.0302311	1.33037	16	56681867	R								NA			MT1B	NM_005947
cg13295262	-0.147233	-5.79112	0.00013082	0.0302693	1.32852	2	177355072	R				chr2:177355071-177355525	Island			TRUE			MIR1246	NR_031648
cg14935646	-0.149686	-5.7905	0.000130936	0.0302792	1.32763	7	27215464	R	HOXA10	NM_153715	Body	chr7:27212416-27214396	S_Shore			NA	7:27215447-27215636	Unclassified_Cell_type_specific	HOXA10	NM_018951
cg12262070	-0.104133	-5.78944	0.000131138	0.030309	1.32607	11	119209451	F				chr11:119210290-119211658	N_Shore			TRUE	11:119208860-119210089	Unclassified	RNF26	NM_032015
cg05839365	-0.0660884	-5.78846	0.000131323	0.0303348	1.32464	12	133166658	F				chr12:133167799-133168125	N_Shore			NA			LOC100507055	NM_001195520
cg23543481	-0.0870449	-5.78781	0.000131446	0.0303405	1.32369	14	23623684	R	SLC7A8;SLC7A8	NM_012244;NM_182728	Body;TSS200					TRUE			SLC7A8	NM_182728
cg05090759	-0.12011	-5.78756	0.000131494	0.0303405	1.32332	2	165812146	F	SLC38A11	NM_173512	TSS200					NA			SLC38A11	BC125157
cg04065210	-0.0705597	-5.7868	0.000131637	0.0303566	1.32222	7	35074628	R	DPY19L1	NM_015283	Body	chr7:35076136-35077808	N_Shore			NA	7:35074501-35074709	Unclassified_Cell_type_specific	DPY19L1	NM_015283
cg02343604	-0.0817938	-5.78499	0.000131981	0.0304191	1.31958	1	23884703	F	ID3	NM_002167	3'UTR	chr1:23884842-23885087	N_Shore			NA	1:23884629-23884888	Unclassified	ID3	NM_002167
cg25601829	-0.0619284	-5.78375	0.000132218	0.030443	1.31777	15	67355497	R				chr15:67357339-67359061	N_Shore		CDMR	NA	15:67355095-67355538	Unclassified_Cell_type_specific	SMAD3	NM_005902
cg17003376	-0.0369623	-5.78333	0.000132299	0.030443	1.31715	11	123613212	F	ZNF202	NM_003455	TSS1500	chr11:123611898-123612545	S_Shore			NA			ZNF202	AK226047
cg15537455	-0.0480328	-5.78314	0.000132335	0.030443	1.31687	19	56739749	F	ZSCAN5A	NM_024303	TSS200	chr19:56739524-56739792	Island			NA			ZSCAN5A	AK098700
cg09701062	-0.0917502	-5.78291	0.000132379	0.030443	1.31654	5	133446318	R				chr5:133449320-133451260	N_Shelf			NA			TCF7	NM_003202
cg16568360	-0.0699766	-5.78181	0.000132589	0.0304742	1.31494	16	29987261	F	TAOK2;TAOK2	NM_004783;NM_016151	5'UTR;5'UTR	chr16:29984664-29985459	S_Shore			TRUE	16:29987249-29987337	Unclassified_Cell_type_specific	TAOK2	BC051798
cg13975098	-0.124483	-5.78128	0.00013269	0.0304806	1.31416	10	121303635	R	RGS10	NM_001005339	TSS1500	chr10:121301478-121303169	S_Shore			NA			RGS10	NM_001005339
cg15624624	-0.0985289	-5.7795	0.000133033	0.0305415	1.31155	10	114819357	F	TCF7L2;TCF7L2;TCF7L2;TCF7L2;TCF7L2;TCF7L2	NM_001146284;NM_001146285;NM_030756;NM_001146274;NM_001146286;NM_001146283	Body;Body;Body;Body;Body;Body					TRUE			TCF7L2	AK301483
cg16791134	-0.114616	-5.77913	0.000133103	0.0305415	1.31102	3	12200856	F	TIMP4;SYN2;SYN2	NM_003256;NM_133625;NM_003178	TSS1500;Body;Body	chr3:12200183-12200532	S_Shore			NA			TIMP4	NM_003256
cg08764037	-0.0777685	-5.77808	0.000133305	0.0305711	1.30948	1	3634867	R	TP73;TP73;TP73;TP73	NM_001126240;NM_005427;NM_001126242;NM_001126241	Body;Body;Body;Body	chr1:3634633-3635101	Island			TRUE			TP73	AK295669
cg05302350	-0.101423	-5.77761	0.000133397	0.0305751	1.30879	4	141013724	R	MAML3	NM_018717	Body					NA			BC040304	BC040304
cg22488352	-0.154974	-5.77615	0.000133679	0.0306228	1.30666	3	111697479	F	ABHD10	NM_018394	TSS1500	chr3:111697739-111698143	N_Shore			NA	3:111697370-111698711	Promoter_Associated	ABHD10	AK300018
cg20663495	-0.0710956	-5.7752	0.000133861	0.0306476	1.30528	17	80943851	F	B3GNTL1	NM_001009905	Body					TRUE	17:80943401-80944592	Promoter_Associated_Cell_type_specific	B3GNTL1	AK054757
cg07797660	-0.0832217	-5.77413	0.000134069	0.0306781	1.30371	1	3239139	R	PRDM16;PRDM16	NM_022114;NM_199454	Body;Body	chr1:3239915-3240261	N_Shore			NA			ARHGEF16	NM_014448
cg16192751	-0.152092	-5.77312	0.000134264	0.0307059	1.30223	12	95945767	R	USP44	NM_032147	TSS1500	chr12:95941906-95942979	S_Shelf			NA			USP44	NM_032147
cg03497907	-0.0512622	-5.77127	0.000134624	0.030766	1.29953	10	131759467	R	EBF3	NM_001005463	Body	chr10:131761169-131771696	N_Shore		RDMR	NA			EBF3	AK097335
cg10752158	-0.10995	-5.77101	0.000134675	0.030766	1.29914	4	81185022	R				chr4:81187494-81187913	N_Shelf		RDMR	NA			FGF5	NM_033143
cg00433296	-0.159846	-5.76978	0.000134914	0.0307926	1.29735	8	22223852	F	SLC39A14;SLC39A14;SLC39A14;SLC39A14	NM_001135154;NM_015359;NM_001128431;NM_001135153	TSS1500;TSS1500;TSS1500;TSS1500	chr8:22224519-22225244	N_Shore		RDMR	NA			SLC39A14	NM_001135154
cg05874348	-0.0987665	-5.76964	0.000134941	0.0307926	1.29715	17	48348086	F	TMEM92	NM_001168215	TSS1500	chr17:48350422-48350832	N_Shelf			NA	17:48346918-48348327	Unclassified	TMEM92	NM_001168215
cg01267709	-0.110282	-5.76909	0.000135048	0.0307953	1.29634	14	23623756	F	SLC7A8;SLC7A8	NM_012244;NM_182728	Body;TSS200					TRUE			SLC7A8	NM_182728
cg09307264	-0.133722	-5.76882	0.000135101	0.0307953	1.29595	17	4902281	R	INCA1;INCA1;KIF1C;INCA1;INCA1	NM_001167986;NM_001167985;NM_006612;NM_213726;NM_001167987	TSS1500;TSS1500;5'UTR;TSS1500;TSS1500	chr17:4900357-4901798	S_Shore			NA			KIF1C	NM_006612
cg08762484	-0.0878396	-5.76799	0.000135263	0.0308152	1.29473	12	125058884	R								TRUE			NCOR2	NM_001206654
cg25320499	-0.0681513	-5.76488	0.000135873	0.0309371	1.29018	1	113052563	R	WNT2B;WNT2B	NM_024494;NM_004185	Body;Body	chr1:113050813-113052301	S_Shore		RDMR	TRUE			WNT2B	NM_024494
cg22796958	-0.0679871	-5.76378	0.000136089	0.0309533	1.28857	3	157221260	R	VEPH1;VEPH1;VEPH1;VEPH1;VEPH1;VEPH1	NM_001167911;NM_001167916;NM_001167915;NM_001167915;NM_001167912;NM_001167916	TSS200;1stExon;1stExon;5'UTR;TSS200;5'UTR					NA			VEPH1	NM_001167911
cg05668703	-0.170898	-5.76376	0.000136093	0.0309533	1.28855	17	79380493	R	BAHCC1	NM_001080519	Body	chr17:79380359-79380723	Island			NA			MIR4740	NR_039894
cg21484547	-0.113376	-5.76337	0.000136171	0.0309537	1.28797	13	28319144	F								TRUE			GSX1	NM_145657
cg22854448	-0.160496	-5.763	0.000136244	0.0309537	1.28742	2	65617203	F	SPRED2	NM_181784	Body					TRUE			SPRED2	NM_001128210
cg20442078	-0.126942	-5.7608	0.000136678	0.0310352	1.28421	2	27531360	F	UCN	NM_003353	TSS1500	chr2:27529083-27531465	Island			NA			UCN	NM_003353
cg19558972	-0.0848236	-5.75993	0.00013685	0.0310571	1.28293	22	23922378	F	IGLL1;IGLL1;IGLL1;IGLL1	NM_152855;NM_020070;NM_020070;NM_152855	1stExon;5'UTR;1stExon;5'UTR					NA			IGLL1	NM_152855
cg24494227	-0.0704836	-5.75918	0.000136999	0.0310632	1.28183	6	168070460	F								NA			AK127120	AK127120
cg11905611	-0.159183	-5.75904	0.000137026	0.0310632	1.28163	12	14720974	R	PLBD1	NM_024829	TSS200	chr12:14720248-14721093	Island			NA			PLBD1	NM_024829
cg20516209	-0.143799	-5.75591	0.000137649	0.0311719	1.27704	2	27301943	F	EMILIN1	NM_007046	1stExon	chr2:27305312-27305612	N_Shelf			TRUE			EMILIN1	NM_007046
cg05778494	-0.132418	-5.75587	0.000137656	0.0311719	1.27699	1	155165346	F				chr1:155163434-155163818	S_Shore			NA	1:155165133-155165720	Unclassified_Cell_type_specific	MIR92B	NR_030281
cg20025977	-0.0977954	-5.75456	0.000137918	0.0312141	1.27507	4	1579814	F				chr4:1580050-1580455	N_Shore			TRUE			AX748388	AX748388
cg06806080	-0.117612	-5.75381	0.000138067	0.0312308	1.27397	3	107810791	R	CD47;CD47;CD47	NM_198793;NM_001025079;NM_001777	TSS1500;TSS1500;TSS1500	chr3:107809375-107810543	S_Shore			NA			CD47	NM_198793
cg22861548	-0.215484	-5.7522	0.00013839	0.031268	1.27161	8	143859669	R	LYNX1;LYNX1;LYNX1;LYNX1	NM_023946;NM_177476;NM_177457;NM_177477	TSS200;TSS1500;TSS200;TSS1500	chr8:143858279-143859411	S_Shore			NA			LYNX1	NM_023946
cg03371962	-0.219306	-5.75191	0.000138447	0.031268	1.27119	12	1772323	R				chr12:1771934-1772513	Island			NA	12:1772224-1773109	Unclassified_Cell_type_specific	MIR3649	NR_037422
cg12080909	-0.105601	-5.75186	0.000138458	0.031268	1.27111	17	27917982	R	GIT1;GIT1	NM_014030;NM_001085454	TSS1500;TSS1500	chr17:27918161-27918398	N_Shore			TRUE	17:27917775-27919250	Unclassified	ANKRD13B	BC062597
cg01077274	-0.10058	-5.75095	0.00013864	0.0312778	1.26978	1	225865487	F				chr1:225865068-225865328	S_Shore			TRUE			AK124056	AK124056
cg20731875	-0.166103	-5.75065	0.000138701	0.0312778	1.26933	17	14207701	F	HS3ST3B1;MGC12916	NM_006041;NR_026880	Body;Body	chr17:14204168-14207702	Island			NA			MGC12916	NR_026880
cg25121437	-0.108852	-5.75051	0.000138728	0.0312778	1.26914	11	125322169	R	FEZ1	NM_005103	Body					TRUE	11:125322046-125323586	Unclassified	FEZ1	CCDS44758
cg12047391	-0.0632362	-5.74976	0.00013888	0.0312949	1.26804	1	160957458	R								TRUE			ITLN2	NM_080878
cg13612207	-0.133164	-5.74895	0.000139044	0.031298	1.26684	6	41604752	F	MDFI	NM_005586	TSS1500	chr6:41604583-41606663	Island	high-CpG:41712530-41712918		NA	6:41604703-41605068	Unclassified_Cell_type_specific	MDFI	NM_005586
cg05234415	-0.103494	-5.74894	0.000139044	0.031298	1.26684	19	38743744	R	PPP1R14A	NM_033256	Body	chr19:38746638-38747379	N_Shelf			TRUE			PPP1R14A	NM_001243947
cg19526353	-0.079028	-5.74786	0.000139263	0.0313302	1.26524	19	42760742	R	ERF	NM_006494	TSS1500	chr19:42757495-42759475	S_Shore			NA			ERF	NM_006494
cg16021126	-0.0960786	-5.7471	0.000139416	0.0313476	1.26413	13	44947611	R	SERP2	NM_001010897	TSS1500	chr13:44947371-44948443	Island			TRUE			SERP2	NM_001010897
cg20200080	-0.0633813	-5.74624	0.000139589	0.0313585	1.26288	2	171830785	F				chr2:171829910-171830708	S_Shore			TRUE	2:171829523-171831113	Promoter_Associated	GORASP2	AK027202
cg13821785	-0.102933	-5.74611	0.000139616	0.0313585	1.26268	7	2657347	F								NA			TTYH3	NM_025250
cg24813206	-0.105852	-5.7454	0.000139761	0.0313739	1.26164	6	112279998	F								TRUE			FYN	NM_002037
cg02886589	-0.0617342	-5.74473	0.000139896	0.0313748	1.26066	2	39892450	R	TMEM178;TMEM178	NM_152390;NM_001167959	TSS1500;TSS200	chr2:39893121-39893496	N_Shore			NA			TMEM178	NM_001167959
cg26152983	-0.112524	-5.74463	0.000139916	0.0313748	1.26051	3	184428654	F	MAGEF1;MAGEF1	NM_022149;NM_022149	1stExon;3'UTR	chr3:184429366-184429907	N_Shore			NA			MAGEF1	NM_022149
cg14832904	-0.116865	-5.74366	0.000140113	0.0313786	1.25909	2	54087028	F	GPR75;LOC100302652;GPR75	NM_006794;NM_001164165;NM_006794	5'UTR;1stExon;1stExon	chr2:54086776-54087266	Island			TRUE			GPR75	NM_006794
cg17322044	-0.238416	-5.74355	0.000140135	0.0313786	1.25893	12	125140105	R								TRUE			NCOR2	NM_001206654
cg17344906	-0.153129	-5.74327	0.000140192	0.0313786	1.25852	19	13202507	R	NFIX	NM_002501	3'UTR	chr19:13198699-13198999	S_Shelf			NA	19:13202502-13202723	Unclassified_Cell_type_specific	LYL1	NM_005583
cg08950287	-0.0467998	-5.74295	0.000140256	0.0313786	1.25806	7	99725807	F	MBLAC1	NM_203397	Body	chr7:99724482-99725808	Island			NA	7:99724355-99726217	Promoter_Associated	MBLAC1	CCDS43620
cg22031964	-0.10379	-5.74268	0.000140312	0.0313786	1.25765	11	62677251	R	CHRM1	NM_000738	Body					TRUE			CHRM1	CCDS8040
cg23291900	-0.0887708	-5.74205	0.00014044	0.0313904	1.25673	1	223316927	F	TLR5	NM_003268	TSS1500	chr1:223316185-223316689	S_Shore			NA			TLR5	NM_003268
cg05212464	-0.0889139	-5.73928	0.000141004	0.0314995	1.25267	5	154071076	F				chr5:154070260-154070470	S_Shore			NA			LARP1	NM_015315
cg01824138	-0.13426	-5.7388	0.000141103	0.0315046	1.25196	1	10699604	R	CASZ1	NM_001079843	Body	chr1:10699394-10700098	Island			NA			CASZ1	AK022285
cg10963061	-0.165881	-5.7352	0.000141841	0.0316523	1.24668	1	158147729	F				chr1:158147433-158147854	Island			NA			CD1D	NM_001766
cg11692124	-0.161617	-5.73317	0.00014226	0.0317286	1.2437	17	79316097	F				chr17:79314962-79320653	Island			NA			TMEM105	NM_178520
cg19443920	-0.127789	-5.73268	0.000142362	0.0317343	1.24297	17	40075879	F	ACLY;ACLY	NM_001096;NM_198830	TSS1500;TSS1500	chr17:40074291-40075380	S_Shore			NA	17:40074089-40076056	Promoter_Associated	ACLY	AK295675
cg09866366	-0.11957	-5.732	0.000142502	0.0317485	1.24198	3	183903315	R	ABCF3	NM_018358	TSS1500	chr3:183903386-183904495	N_Shore			NA	3:183903283-183904381	Promoter_Associated	ABCF3	AK092415
cg25374649	-0.114989	-5.73121	0.000142665	0.0317601	1.24082	18	13611400	F	C18orf1;C18orf1;C18orf1;C18orf1	NM_001003675;NM_181481;NM_181482;NM_001003674	TSS1500;Body;Body;TSS1500					TRUE	18:13611356-13611575	Promoter_Associated	C18orf1	NM_001003675
cg15591276	-0.11144	-5.731	0.000142708	0.0317601	1.24052	7	1265851	F				chr7:1263496-1264364	S_Shore		RDMR	TRUE	7:1264972-1266336	Unclassified	UNCX	NM_001080461
cg16190225	-0.159287	-5.72999	0.000142918	0.0317898	1.23903	7	1163456	R	C7orf50;C7orf50;C7orf50	NM_001134395;NM_032350;NM_001134396	Body;Body;Body					TRUE	7:1163254-1164103	Unclassified_Cell_type_specific	C7orf50	NM_001134396
cg14525247	-0.13471	-5.7296	0.000142999	0.0317907	1.23846	9	131154899	F	MIR219-2	NR_029837	Body	chr9:131154346-131155923	Island			NA			MIR2964A	NR_039815
cg16102052	-0.106555	-5.72803	0.000143326	0.0318427	1.23614	1	223196106	R								TRUE			TLR5	CCDS31033
cg22453435	-0.0632155	-5.72774	0.000143386	0.0318427	1.23572	4	38667430	F	FLJ13197;KLF3	NR_026804;NM_016531	TSS1500;5'UTR	chr4:38664649-38666531	S_Shore			NA			FLJ13197	AF289565
cg23359665	-0.186992	-5.72558	0.000143837	0.0319256	1.23255	6	32120907	R	PPT2;PRRT1;PPT2	NM_005155;NM_030651;NM_138717	TSS1500;TSS1500;TSS1500	chr6:32121829-32122529	N_Shore			TRUE	6:32120376-32123743	Promoter_Associated	PRRT1	BC013201
cg08173263	-0.0549498	-5.72358	0.000144255	0.0319839	1.22961	19	14276911	R	LPHN1;LPHN1	NM_014921;NM_001008701	Body;Body	chr19:14273429-14274173	S_Shelf			TRUE	19:14276822-14277550	Unclassified_Cell_type_specific	BC141944	BC141944
cg14995562	-0.0989217	-5.7235	0.00014427	0.0319839	1.2295	22	38714166	R	CSNK1E;CSNK1E	NM_001894;NM_152221	TSS200;TSS1500	chr22:38712684-38713333	S_Shore			NA			CSNK1E	NM_001894
cg01111041	-0.103742	-5.72312	0.000144351	0.0319839	1.22893	6	32121055	F	PPT2;PRRT1;PPT2	NM_005155;NM_030651;NM_138717	TSS1500;TSS1500;TSS1500	chr6:32121829-32122529	N_Shore			TRUE	6:32120376-32123743	Promoter_Associated	PPT2	NM_138717
cg22284058	-0.132761	-5.72284	0.000144408	0.0319839	1.22853	8	142237359	F	SLC45A4	NM_001080431	Body	chr8:142237037-142237360	Island			NA	8:142237180-142237486	Unclassified_Cell_type_specific	SLC45A4	NM_001080431
cg26326633	-0.127576	-5.72236	0.000144509	0.0319891	1.22782	8	41655078	R	ANK1;ANK1;ANK1;ANK1;ANK1;ANK1;ANK1;ANK1;ANK1	NM_000037;NM_020476;NM_020476;NM_020477;NM_020475;NM_020477;NM_000037;NM_001142446;NM_020475	1stExon;1stExon;5'UTR;5'UTR;5'UTR;1stExon;5'UTR;Body;1stExon	chr8:41654875-41655984	Island			NA	8:41654959-41655898	Unclassified_Cell_type_specific	ANK1	NM_020477
cg02975463	-0.103284	-5.72138	0.000144716	0.0320148	1.22638	2	45178953	F				chr2:45179364-45180394	N_Shore		RDMR	NA	2:45178423-45180272	Unclassified	SIX3	NM_005413
cg26484464	0.0531569	5.72108	0.00014478	0.0320148	1.22593	6	30537886	F	ABCF1;ABCF1	NM_001090;NM_001025091	TSS1500;TSS1500	chr6:30538983-30539487	N_Shore			NA			ABCF1	NM_001090
cg03119829	-0.11269	-5.7204	0.000144922	0.0320293	1.22493	1	64170964	R							DMR	NA	1:64170893-64170969	Unclassified_Cell_type_specific	ROR1	NM_005012
cg06222087	-0.0508037	-5.71825	0.000145375	0.0320888	1.22178	20	60638858	R	TAF4	NM_003185	Body	chr20:60638612-60638982	Island			TRUE	20:60637939-60640028	Promoter_Associated	TAF4	NM_003185
cg09289148	-0.11429	-5.71784	0.000145462	0.0320888	1.22118	16	1480869	R				chr16:1480844-1481045	Island			NA	16:1480736-1481040	Unclassified_Cell_type_specific	C16orf91	NM_001010878
cg05543112	-0.0700743	-5.71774	0.000145483	0.0320888	1.22103	2	85294381	R								NA	2:85293251-85294515	Unclassified	TCF7L1	NM_031283
cg03915559	-0.151615	-5.71765	0.000145502	0.0320888	1.2209	10	95518976	R	LGI1	NM_005097	Body					TRUE			LGI1	AK309416
cg25026480	-0.0815857	-5.71603	0.000145845	0.0321473	1.21852	8	42547641	F								TRUE	8:42547389-42548428	Unclassified	CHRNB3	NM_000749
cg11972677	-0.101367	-5.7153	0.000146	0.0321644	1.21744	11	30605704	F	MPPED2	NM_001145399	5'UTR	chr11:30605558-30605800	Island			NA			MPPED2	AK309809
cg13928759	-0.139667	-5.7143	0.000146213	0.0321942	1.21596	10	95517382	F	LGI1	NM_005097	TSS200					TRUE			LGI1	AK303956
cg14552982	-0.128134	-5.71345	0.000146393	0.0322167	1.21472	9	133568226	R	EXOSC2	NM_014285	TSS1500	chr9:133569082-133569451	N_Shore		RDMR	NA	9:133567603-133568233	Unclassified_Cell_type_specific	EXOSC2	AK303163
cg13169796	-0.112495	-5.71249	0.000146596	0.0322382	1.21331	11	86793667	F	TMEM135;TMEM135;TMEM135	NR_033149;NM_022918;NM_001168724	Body;Body;Body					TRUE			TMEM135	CU689045
cg24679905	-0.0860272	-5.71192	0.000146719	0.0322382	1.21246	7	4853896	R	RADIL	NM_018059	Body	chr7:4855990-4856212	N_Shelf			NA			RADIL	BC004919
cg23009419	-0.127101	-5.7119	0.000146724	0.0322382	1.21243	3	46618597	R	LRRC2;TDGF1	NM_024750;NM_003212	5'UTR;TSS1500	chr3:46618307-46618669	Island			NA			TDGF1	NM_003212
cg13385210	-0.164687	-5.71025	0.000147075	0.0322946	1.21002	17	38599271	R	IGFBP4	NM_001552	TSS1500	chr17:38599270-38599524	Island			NA	17:38598963-38601020	Promoter_Associated	IGFBP4	NM_001552
cg02836046	-0.0971716	-5.70996	0.000147137	0.0322946	1.20959	21	38120824	F	SIM2	NM_005069	3'UTR	chr21:38119793-38120742	S_Shore			NA			SIM2	NM_009586
cg14476101	-0.162399	-5.70857	0.000147435	0.0323279	1.20754	1	120255992	R	PHGDH	NM_006623	Body	chr1:120254844-120255499	S_Shore		RDMR	NA			PHGDH	NM_006623
cg04208928	-0.145097	-5.70853	0.000147445	0.0323279	1.20747	1	226498038	F	LIN9	NM_173083	TSS1500	chr1:226496361-226497501	S_Shore			NA			LIN9	BC065302
cg02975107	-0.0920242	-5.70536	0.000148125	0.0324599	1.20281	17	75276788	R	2017-09-09	NM_001113491	TSS1500	chr17:75277317-75278172	N_Shore			TRUE	17:75276087-75276954	Unclassified	41161	AK300270
cg22171758	-0.118428	-5.7043	0.000148354	0.0324929	1.20125	12	54146133	F				chr12:54144562-54145470	S_Shore		CDMR	NA	12:54144031-54146347	Unclassified	CALCOCO1	NM_020898
cg04729004	-0.0841958	-5.70086	0.000149099	0.0326389	1.19618	7	128550932	F	KCP;KCP	NM_001135914;NM_199349	TSS200;TSS200	chr7:128550409-128550903	S_Shore			NA	7:128550741-128551016	Unclassified_Cell_type_specific	KCP	NM_001135914
cg01474544	-0.0864909	-5.69994	0.000149297	0.032665	1.19483	6	4774793	F	CDYL	NR_026590	Body	chr6:4775131-4777550	N_Shore		RDMR	NA			CDYL	BC119682
cg17842821	-0.0944679	-5.69934	0.000149428	0.0326763	1.19395	5	1834682	F								TRUE			NDUFS6	NM_004553
cg25764534	-0.0978693	-5.6972	0.000149894	0.0327536	1.19079	8	22485721	F	BIN3	NM_018688	Body					TRUE			FLJ14107	NR_027715
cg05885484	-0.092306	-5.69699	0.00014994	0.0327536	1.19049	5	122847316	R	CSNK1G3;CSNK1G3;CSNK1G3;CSNK1G3	NM_004384;NM_001044723;NM_001044722;NM_001031812	TSS1500;TSS1500;TSS1500;TSS1500	chr5:122847661-122848292	N_Shore		CDMR	NA			CSNK1G3	AK316019
cg00700214	-0.0760949	-5.69646	0.000150057	0.032762	1.18969	1	171154802	R	FMO2	NM_001460	5'UTR					TRUE			FMO2	AK304385
cg24696183	-0.139633	-5.69435	0.000150519	0.0328454	1.18659	11	2891360	F	KCNQ1DN	NR_024627	Body	chr11:2890388-2891337	S_Shore			TRUE			KCNQ1DN	NR_024627
cg21553980	-0.18959	-5.69375	0.00015065	0.0328567	1.18571	17	109444	F	RPH3AL	NM_006987	Body					TRUE			RPH3AL	BC143311
cg05609160	-0.112523	-5.69337	0.000150733	0.0328576	1.18514	15	91208370	F				chr15:91208319-91209026	Island			NA			BC038778	BC038778
cg14957346	-0.135553	-5.69252	0.00015092	0.032881	1.18389	17	39943439	F	JUP;JUP	NM_002230;NM_021991	TSS1500;TSS1500	chr17:39942175-39943176	S_Shore			NA	17:39942020-39943538	Unclassified	JUP	NM_002230
cg22810423	-0.19614	-5.69073	0.000151313	0.0329463	1.18126	1	200272180	R				chr1:200271276-200271538	S_Shore			NA	1:200270611-200272226	Promoter_Associated_Cell_type_specific	C1orf98	NR_040064
cg12214451	-0.130131	-5.69043	0.000151379	0.0329463	1.18082	4	114900175	R	ARSJ;ARSJ	NM_024590;NM_024590	1stExon;5'UTR	chr4:114900355-114900810	N_Shore			NA	4:114899991-114900840	Unclassified_Cell_type_specific	ARSJ	AM049401
cg11245205	-0.149033	-5.68901	0.000151693	0.0329975	1.17872	17	17398264	R	RASD1	NM_016084	3'UTR	chr17:17398248-17400346	Island			NA	17:17398224-17398386	Unclassified_Cell_type_specific	RASD1	NM_001199989
cg20733077	-0.175077	-5.68835	0.00015184	0.0330119	1.17774	13	50700845	F	DLEU2	NR_002612	TSS1500	chr13:50697984-50702286	Island		RDMR	NA			DLEU2	NR_002612
cg01185080	-0.186164	-5.68742	0.000152045	0.0330391	1.17638	15	90543813	F	ZNF710	NM_198526	TSS1500	chr15:90543410-90543835	Island			NA			ZNF710	NM_198526
cg25705519	-0.150417	-5.68618	0.000152321	0.0330716	1.17454	3	159557552	R	SCHIP1	NM_014575	Body				RDMR	TRUE			SCHIP1	NM_001197109
cg04525683	-0.0925969	-5.68589	0.000152385	0.0330716	1.17411	14	71290144	F				chr14:71288403-71288957	S_Shore		RDMR	NA			MAP3K9	NM_033141
cg20389981	-0.073709	-5.68567	0.000152433	0.0330716	1.17379	7	128432280	R	CCDC136;CCDC136	NM_022742;NM_022742	1stExon;5'UTR	chr7:128430707-128432003	S_Shore			NA			CCDC136	NM_022742
cg19234738	-0.146168	-5.6845	0.000152694	0.0331017	1.17206	3	134031551	F				chr3:134031662-134032591	N_Shore			NA			AMOTL2	AK091040
cg16419724	-0.151107	-5.68382	0.000152846	0.0331017	1.17106	5	68711519	F	MARVELD2;MARVELD2	NM_001038603;NM_144724	5'UTR;5'UTR	chr5:68710807-68711520	Island		RDMR	TRUE	5:68710594-68712104	Unclassified_Cell_type_specific	MARVELD2	NM_001038603
cg25926515	-0.165296	-5.68339	0.00015294	0.0331017	1.17043	10	70321889	R	TET1	NM_030625	5'UTR	chr10:70320130-70320822	S_Shore			NA	10:70321659-70322030	Unclassified_Cell_type_specific	TET1	NM_030625
cg02990330	-0.153778	-5.68321	0.000152982	0.0331017	1.17016	1	43751504	F	C1orf210;C1orf210	NM_001164829;NM_182517	TSS1500;TSS1500					NA			C1orf210	NM_001164829
cg05955675	-0.227627	-5.68312	0.000153	0.0331017	1.17003	16	85206653	R				chr16:85204598-85205031	S_Shore		RDMR	NA			LOC400548	NR_033984
cg16519668	-0.099485	-5.68266	0.000153103	0.0331017	1.16935	16	75279566	R	BCAR1;BCAR1;BCAR1;BCAR1;BCAR1;BCAR1;BCAR1;BCAR1	NM_001170718;NM_001170719;NM_001170715;NM_001170720;NM_014567;NM_001170714;NM_001170716;NM_001170717	Body;Body;Body;Body;Body;Body;Body;Body					TRUE			BCAR1	NM_001170719
cg07692489	-0.178931	-5.68216	0.000153215	0.0331017	1.16861	16	8960972	F	CARHSP1;CARHSP1	NM_014316;NM_001042476	5'UTR;5'UTR	chr16:8962189-8963190	N_Shore			NA			CARHSP1	NM_001042476
cg11403708	-0.106596	-5.68202	0.000153247	0.0331017	1.16841	20	62605086	F				chr20:62605261-62605463	N_Shore			NA	20:62605061-62605743	Gene_Associated	ZNF512B	NM_020713
cg25532627	-0.0504045	-5.68182	0.000153292	0.0331017	1.16811	17	77997833	R	TBC1D16	NM_019020	5'UTR	chr17:77997723-77997951	Island			NA			TBC1D16	NM_019020
cg16555505	-0.0671492	-5.68091	0.000153494	0.0331231	1.16677	1	182756164	R				chr1:182758395-182759097	N_Shelf			NA	1:182755839-182756761	Unclassified	NPL	NM_001200050
cg19458020	-0.072947	-5.68043	0.000153603	0.0331231	1.16606	17	38473119	R	RARA;RARA;RARA	NM_001145302;NM_000964;NM_001145301	TSS1500;5'UTR;TSS1500	chr17:38472958-38473201	Island			TRUE	17:38472852-38476047	Promoter_Associated	RARA	NM_001145302
cg17918558	-0.152604	-5.6803	0.000153631	0.0331231	1.16587	1	46945595	R								TRUE			DMBX1	NM_172225
cg05679108	-0.0950053	-5.6794	0.000153834	0.0331497	1.16453	6	1395061	F	FOXF2	NM_001452	Body	chr6:1393049-1394170	S_Shore		RDMR	NA			FOXF2	NM_001452
cg16622061	-0.106084	-5.67767	0.000154221	0.033199	1.16199	16	86888736	F								TRUE			BC041439	BC041439
cg20608085	-0.0811334	-5.67766	0.000154223	0.033199	1.16197	11	45943130	F	GYLTL1B	NM_152312	TSS200	chr11:45943513-45944852	N_Shore			NA			GYLTL1B	AK055829
cg00593462	-0.133763	-5.67632	0.000154525	0.0332467	1.16	13	110768493	R								NA	13:110767525-110769072	Unclassified	COL4A1	NM_001845
cg03586240	-0.135931	-5.67309	0.000155256	0.0333772	1.15522	7	1966361	F	MAD1L1;MAD1L1;MAD1L1	NM_003550;NM_001013837;NM_001013836	Body;Body;Body	chr7:1967664-1967994	N_Shore			NA			MAD1L1	BC018870
cg27466845	-0.137494	-5.67277	0.000155328	0.0333772	1.15475	11	64397734	F	NRXN2;NRXN2;NRXN2	NM_138734;NM_138732;NM_015080	Body;Body;Body	chr11:64397644-64398016	Island			NA			NRXN2	AK098211
cg07207490	-0.163751	-5.67257	0.000155373	0.0333772	1.15445	11	118492463	R	PHLDB1;PHLDB1;PHLDB1	NM_001144759;NM_015157;NM_001144758	Body;Body;Body					TRUE	11:118492461-118492681	Unclassified_Cell_type_specific	PHLDB1	AB177859
cg18163342	-0.112085	-5.66974	0.000156017	0.0334791	1.15027	14	105332627	R	KIAA0284;KIAA0284	NM_015005;NM_001112726	5'UTR;5'UTR	chr14:105332408-105332651	Island			NA			KIAA0284	NM_015005
cg08901558	-0.0783294	-5.66951	0.000156068	0.0334791	1.14994	17	59472854	F				chr17:59473060-59483266	N_Shore		RDMR	NA	17:59472090-59473292	Unclassified	TBX2	BC070054
cg06758350	-0.222984	-5.66842	0.000156318	0.0334791	1.14832	21	36259460	F	RUNX1;RUNX1;RUNX1;RUNX1;RUNX1	NM_001122607;NM_001001890;NM_001001890;NM_001122607;NM_001754	5'UTR;1stExon;5'UTR;1stExon;Body	chr21:36258952-36259472	Island			TRUE			RUNX1	NM_001122607
cg18893120	-0.0826813	-5.66841	0.000156319	0.0334791	1.14831	8	125741209	R	MTSS1	NM_014751	TSS1500	chr8:125739685-125741266	Island			NA			MTSS1	AK027015
cg14074251	-0.124889	-5.66828	0.00015635	0.0334791	1.14811	2	220299116	R	SPEG	NM_005876	TSS1500	chr2:220299483-220300243	N_Shore			TRUE			SPEG	NM_005876
cg26878949	-0.117116	-5.66812	0.000156387	0.0334791	1.14787	9	98279753	F	PTCH1;PTCH1	NM_001083602;NM_001083603	TSS1500;TSS1500	chr9:98278128-98279754	Island		RDMR	NA			PTCH1	NM_001083602
cg09988676	-0.12008	-5.668	0.000156413	0.0334791	1.1477	2	233390969	R	CHRND	NM_000751	1stExon	chr2:233386614-233389161	S_Shore			NA			CHRND	AK296704
cg26929272	-0.164589	-5.66743	0.000156544	0.0334898	1.14685	10	88295210	R				chr10:88295205-88295592	Island			TRUE			WAPAL	BC140858
cg21544713	-0.0777353	-5.66621	0.000156822	0.033532	1.14506	8	61326407	F								TRUE			AK124262	AK124262
cg16987638	-0.0891764	-5.66572	0.000156934	0.0335385	1.14434	6	1601509	F				chr6:1601624-1602138	N_Shore			NA			FOXC1	NM_001453
cg17873048	-0.0962866	-5.6644	0.000157238	0.0335851	1.14238	17	46697700	F				chr17:46697413-46697701	Island		RDMR	NA			HOXB8	NM_024016
cg07278425	-0.255565	-5.66404	0.000157319	0.0335851	1.14185	7	27137922	F				chr7:27135342-27136736	S_Shore			NA			HOTAIRM1	NR_038366
cg04654167	-0.132566	-5.66371	0.000157395	0.0335851	1.14137	6	158090949	R	ZDHHC14;ZDHHC14	NM_153746;NM_024630	Body;Body	chr6:158093810-158094080	N_Shelf			TRUE	6:158090396-158091245	Unclassified_Cell_type_specific	ZDHHC14	AK124573
cg27046604	-0.0635026	-5.6628	0.000157606	0.0336127	1.14001	15	41135869	R	SPINT1;SPINT1;SPINT1	NM_003710;NM_001032367;NM_181642	TSS1500;TSS1500;TSS1500	chr15:41135719-41137210	Island			NA	15:41135661-41137383	Unclassified_Cell_type_specific	SPINT1	NM_181642
cg02940562	-0.106826	-5.66227	0.000157727	0.0336213	1.13923	16	4314246	F	TFAP4	NM_003223	Body	chr16:4311695-4311942	S_Shelf			TRUE			TFAP4	NM_003223
cg22697136	-0.145097	-5.66143	0.000157921	0.0336452	1.13799	1	11714248	R	FBXO44;FBXO2;FBXO44;FBXO44;FBXO44	NM_183413;NM_012168;NM_033182;NM_183412;NM_001014765	TSS1500;Body;TSS1500;TSS200;TSS1500	chr1:11714217-11715304	Island			NA			FBXO2	AK308531
cg11854183	-0.117021	-5.66065	0.0001581	0.0336515	1.13684	19	38741928	R	PPP1R14A	NM_033256	3'UTR					TRUE			PPP1R14A	NM_001243947
cg11268280	-0.178186	-5.6606	0.000158113	0.0336515	1.13676	8	142316072	R				chr8:142318353-142319155	N_Shelf			TRUE	8:142315971-142316654	Unclassified_Cell_type_specific	LOC731779	NR_024441
cg18842157	-0.115661	-5.65988	0.000158279	0.0336695	1.1357	14	68825875	F	RAD51L1;RAD51L1;RAD51L1	NM_133509;NM_002877;NM_133510	Body;Body;Body					TRUE	14:68825651-68825885	Unclassified_Cell_type_specific	Metazoa_SRP	.
cg00782200	-0.181335	-5.65903	0.000158476	0.0336942	1.13444	2	145280523	F				chr2:145281736-145282269	N_Shore			NA			ZEB2_AS1_4	.
cg02873954	-0.180154	-5.6581	0.000158691	0.0337227	1.13306	21	45161415	R	PDXK	NM_003681	Body			high-CpG:43985771-43985861		NA			PDXK	AK056502
cg02207386	-0.158195	-5.65416	0.000159609	0.0339003	1.12723	7	25895834	F				chr7:25896713-25896925	N_Shore			NA			MIR148A	NR_029597
cg07740525	-0.138636	-5.65264	0.000159964	0.0339583	1.12498	9	116861532	R	KIF12	NM_138424	TSS200	chr9:116860979-116861591	Island		RDMR	NA			KIF12	BC036824
cg14218844	-0.0814541	-5.65221	0.000160063	0.0339619	1.12435	18	56709536	R	LOC390858	NR_024021	Body					TRUE			LOC390858	NR_024021
cg12432006	-0.108489	-5.65111	0.000160322	0.0339917	1.12271	17	71192905	F	COG1	NM_018714	Body	chr17:71188407-71189458	S_Shelf			NA			COG1	BC047465
cg01287088	-0.184263	-5.65091	0.000160368	0.0339917	1.12243	5	176827392	F	PFN3	NM_001029886	1stExon	chr5:176827081-176827754	Island			NA			PFN3	NM_001029886
cg14652587	-0.174187	-5.65051	0.000160462	0.0339943	1.12183	17	75692571	R								NA	17:75692553-75692694	Unclassified_Cell_type_specific	LOC100507351	NR_040050
cg04157161	-0.151769	-5.64931	0.000160743	0.0340365	1.12006	17	7906847	F	GUCY2D	NM_000180	Body	chr17:7905927-7907445	Island			TRUE	17:7905262-7907043	Unclassified_Cell_type_specific	GUCY2D	NM_000180
cg17453840	-0.171964	-5.64807	0.000161035	0.0340567	1.11822	15	83317526	R	CPEB1	NM_030594	TSS1500	chr15:83315116-83317541	Island			NA	15:83315862-83317582	Unclassified	CPEB1	NM_030594
cg04661709	-0.150565	-5.64796	0.000161062	0.0340567	1.11805	9	124360264	R	DAB2IP	NM_032552	Body	chr9:124360438-124362382	N_Shore		RDMR	NA	9:124359884-124360622	Unclassified_Cell_type_specific	DAB2IP	NM_032552
cg00199007	-0.154692	-5.64765	0.000161135	0.0340567	1.11759	20	61583910	R	SLC17A9	NM_022082	TSS200	chr20:61583891-61584222	Island			NA	20:61583839-61584178	Promoter_Associated	SLC17A9	BC025312
cg07922154	-0.0917379	-5.64751	0.000161167	0.0340567	1.11739	14	68087339	F	ARG2	NM_001172	Body	chr14:68086277-68086957	S_Shore			NA			ARG2	NM_001172
cg12332863	-0.0890267	-5.64687	0.000161319	0.0340713	1.11644	11	113906781	F				chr11:113906920-113907332	N_Shore			NA	11:113905969-113907630	Unclassified	ZBTB16	NM_006006
cg16125874	-0.161916	-5.6435	0.000162116	0.0342221	1.11145	14	38723500	R	CLEC14A;CLEC14A	NM_175060;NM_175060	1stExon;3'UTR	chr14:38724254-38725537	N_Shore			NA			CLEC14A	NM_175060
cg23005797	0.0405326	5.64116	0.000162673	0.0343039	1.10798	2	10302462	R	C2orf48	NM_182626	Body					NA			C2orf48	NM_182626
cg22659049	-0.157052	-5.64099	0.000162714	0.0343039	1.10772	4	41646672	R	LIMCH1;LIMCH1;LIMCH1;LIMCH1;LIMCH1	NM_014988;NM_001112718;NM_001112720;NM_001112717;NM_001112719	Body;Body;Body;Body;Body	chr4:41646292-41646582	S_Shore			TRUE	4:41645994-41646815	Unclassified_Cell_type_specific	LIMCH1	AK302674
cg20740051	-0.137083	-5.64083	0.000162752	0.0343039	1.10748	1	161147718	R	B4GALT3	NM_003779	TSS1500	chr1:161147061-161147451	S_Shore			NA	1:161146649-161147739	Promoter_Associated	B4GALT3	AK291455
cg20426710	-0.10559	-5.63905	0.000163176	0.0343759	1.10485	22	50248907	F	ZBED4	NM_014838	5'UTR	chr22:50250160-50250513	N_Shore		RDMR	NA			ZBED4	NM_014838
cg01775612	-0.110187	-5.63775	0.000163487	0.0344167	1.10292	16	31484199	R	TGFB1I1;TGFB1I1;TGFB1I1	NM_001042454;NM_015927;NM_001164719	Body;TSS1500;5'UTR	chr16:31483276-31483646	S_Shore			NA	16:31483058-31484771	Unclassified	TGFB1I1	NM_015927
cg24636368	-0.148391	-5.63754	0.000163536	0.0344167	1.10262	17	46388447	R	SKAP1;SKAP1	NM_003726;NM_001075099	Body;Body					NA			SKAP1	AK290818
cg20457147	-0.131911	-5.6362	0.000163858	0.0344394	1.10062	14	61787823	R	PRKCH	NM_006255	TSS1500	chr14:61787880-61789467	N_Shore			NA	14:61787646-61789040	Promoter_Associated	PRKCH	NM_006255
cg23537932	-0.100236	-5.63578	0.000163957	0.0344394	1.10001	10	121172463	F	GRK5	NM_005308	Body					TRUE			MIR4681	NR_039829
cg27237537	-0.104194	-5.63576	0.000163964	0.0344394	1.09997	21	45683513	R	DNMT3L;DNMT3L	NM_013369;NM_175867	TSS1500;TSS1500					NA			DNMT3L	NM_175867
cg03492827	-0.0942203	-5.6357	0.000163977	0.0344394	1.09989	7	72838601	F				chr7:72838383-72838815	Island			NA			FZD9	NM_003508
cg18026062	-0.110387	-5.63513	0.000164114	0.0344507	1.09905	5	167642863	F	ODZ2	NM_001122679	Body					TRUE			WWC1	NM_015238
cg20340190	-0.0839287	-5.63423	0.000164331	0.0344698	1.09771	17	27950413	F				chr17:27949429-27950277	S_Shore			NA	17:27949365-27950425	Unclassified	CORO6	NM_032854
cg19719391	-0.119566	-5.63406	0.000164371	0.0344698	1.09746	4	26789915	F								TRUE	4:26789777-26790040	Unclassified_Cell_type_specific	STIM2	NM_020860
cg24830730	-0.140556	-5.63319	0.000164583	0.0344967	1.09616	7	150653195	F	KCNH2;KCNH2;KCNH2	NM_172056;NM_000238;NM_172057	Body;Body;TSS1500	chr7:150655108-150655643	N_Shore			TRUE			KCNH2	NM_001204798
cg23178550	-0.102392	-5.63249	0.000164749	0.0345142	1.09513	7	27127576	F				chr7:27127500-27128368	Island			NA			HOXA1	CU689416
cg20638675	-0.255499	-5.632	0.00016487	0.034522	1.09439	10	45374906	R							DMR	TRUE	10:45374031-45374969	Promoter_Associated_Cell_type_specific	TMEM72	BC127789
cg03631656	-0.11376	-5.6305	0.000165231	0.0345802	1.09218	8	6420770	R	ANGPT2;ANGPT2;ANGPT2;ANGPT2;ANGPT2;ANGPT2;MCPH1	NM_001118888;NM_001147;NM_001118887;NM_001118888;NM_001147;NM_001118887;NM_024596	5'UTR;1stExon;5'UTR;1stExon;5'UTR;1stExon;Body	chr8:6424215-6424888	N_Shelf			TRUE	8:6420381-6420930	Unclassified_Cell_type_specific	ANGPT2	AK310171
cg22933058	-0.0987109	-5.62978	0.000165405	0.0345991	1.09111	1	43472972	F				chr1:43472867-43473334	Island			TRUE			U6	.
cg05357695	-0.114964	-5.62934	0.000165512	0.034604	1.09045	14	23623480	R	SLC7A8;SLC7A8;SLC7A8	NM_182728;NM_012244;NM_182728	5'UTR;Body;1stExon					NA			SLC7A8	AK300384
cg23928512	-0.0808645	-5.6287	0.000165667	0.0346071	1.08951	17	79970192	R	ASPSCR1	NM_024083	Body	chr17:79966854-79967138	S_Shelf			NA			STRA13	U95007
cg09159285	-0.111828	-5.62859	0.000165694	0.0346071	1.08934	1	6664134	F	KLHL21	NM_014851	TSS1500	chr1:6661776-6663844	S_Shore			NA	1:6663796-6664445	Promoter_Associated	KLHL21	NM_014851
cg17452615	-0.132699	-5.62821	0.000165786	0.0346088	1.08878	12	122019080	R	KDM2B;KDM2B	NM_032590;NM_001005366	TSS200;TSS1500	chr12:122016170-122017693	S_Shore	low-CpG:120503262-120503513	RDMR	NA	12:122019013-122020752	Promoter_Associated	KDM2B	NM_032590
cg22522920	-0.0905306	-5.62728	0.000166014	0.0346389	1.08739	12	50276512	R	FAIM2	NM_012306	Body					TRUE			FAIM2	AK090728
cg00063982	-0.0286903	-5.62684	0.000166121	0.0346439	1.08674	1	53040491	R								TRUE			ZCCHC11	AK308427
cg03662049	-0.185694	-5.62558	0.000166427	0.0346901	1.08488	2	164204829	F				chr2:164204740-164205039	Island			TRUE			FIGN	NM_018086
cg24945462	-0.165379	-5.6224	0.000167206	0.0348219	1.08015	21	46714985	F	LOC642852	NR_026943	Body	chr21:46714984-46715206	Island			NA	21:46714374-46715423	Unclassified	LOC642852	NR_026943
cg14605877	-0.0624384	-5.62231	0.000167227	0.0348219	1.08002	3	184466433	F								TRUE	3:184466094-184466642	Unclassified	MAGEF1	NM_022149
cg07848566	-0.0572568	-5.62151	0.000167423	0.0348452	1.07883	12	49731640	F	C1QL4	NM_001008223	TSS1500	chr12:49729728-49731162	S_Shore		CDMR	NA	12:49730427-49731888	Unclassified	C1QL4	NM_001008223
cg13661182	-0.10498	-5.62111	0.000167522	0.0348483	1.07824	20	52687076	R	BCAS1;BCAS1	NM_003657;NM_003657	1stExon;5'UTR			low-CpG:52120473-52120517		NA			BCAS1	AK304213
cg26972554	-0.0690499	-5.61957	0.0001679	0.0349094	1.07595	5	126409454	R	FLJ44606;FLJ44606	NM_001164479;NM_001164478	TSS1500;TSS1500	chr5:126409006-126409327	S_Shore			NA	5:126408222-126409580	Promoter_Associated	C5orf63	AK126569
cg24932660	-0.144954	-5.61891	0.000168064	0.0349259	1.07497	1	27709575	F	CD164L2	NM_207397	Body	chr1:27709600-27709831	N_Shore			TRUE			CD164L2	NM_207397
cg00474218	-0.0824236	-5.61854	0.000168153	0.034927	1.07443	15	67143904	R								TRUE	15:67142865-67144635	Unclassified	BX538221	BX538221
cg00220225	-0.127488	-5.61665	0.000168621	0.0350066	1.07161	3	50194470	F	SEMA3F	NM_004186	5'UTR	chr3:50191971-50193130	S_Shore			TRUE	3:50193725-50194689	Unclassified_Cell_type_specific	AK125500	AK125500
cg13649253	-0.0960093	-5.61609	0.00016876	0.0350178	1.07078	19	13198798	R	NFIX	NM_002501	Body	chr19:13198699-13198999	Island			NA			LYL1	NM_005583
cg14911856	-0.0730696	-5.61539	0.000168932	0.035036	1.06975	1	47999856	F				chr1:47998899-47999517	S_Shore			TRUE			FOXD2	NM_004474
cg12160741	-0.154683	-5.61479	0.000169082	0.0350495	1.06885	14	105760556	F	BRF1	NM_001519	Body					TRUE	14:105760538-105760945	Promoter_Associated	PACS2	NM_001243127
cg27139457	-0.056009	-5.61368	0.000169357	0.035089	1.0672	2	85637739	F	CAPG	NM_001747	TSS200	chr2:85640969-85641259	N_Shelf			NA	2:85637129-85637859	Promoter_Associated	CAPG	AK225378
[truncated: 607 more rows]
