# Supplementary material for: Growth disrupting mutations in epigenetic regulatory molecules are associated with abnormalities of epigenetic aging
Source: Genome Res. 2019 Jul;29(7):1057–66. doi: 10.1101/gr.243584.118 (PMC6633263; doi:10.1101/gr.243584.118)
Supplement: Supplemental Material [file supp_gr.243584.118_Supplemental_Table_S4.xlsx]

## Sheet: Legend
Supplemental Table S4 - Results from Gene Ontology and KEGG pathway enrichment analysis
LEGEND:
GO			Gene ontology (GO) identifier
Term			GO term description
Ont			ontology that the GO term belongs to if testing GO pathways. "BP" - biological process, "CC" - cellular component, "MF" - molecular function
N			number of genes in the gene set
DE			number of genes that are differentially methylated
P.DE			p-value for over-representation of the gene set
FDR			False discovery rate, calculated using the method of Benjamini and Hochberg (1995)
KEGG			KEGG identifier
desc			description of KEGG term
N			number of genes in the gene set
DE			number of genes that are differentially methylated
P.DE			p-value for over-representation of the gene set
FDR			False discovery rate, calculated using the method of Benjamini and Hochberg (1995)

## Sheet: Gene Ontology
GO	Term	Ont	N	DE	P.DE	FDR
GO:0007275	multicellular organism development	BP	4724	474	2.61973e-11	3.70849e-07
GO:0048856	anatomical structure development	BP	5151	505	3.42096e-11	3.70849e-07
GO:0044767	single-organism developmental process	BP	5437	521	9.36274e-11	6.76646e-07
GO:0048731	system development	BP	4202	432	1.32425e-10	7.17777e-07
GO:0032502	developmental process	BP	5518	525	2.43207e-10	1.0546e-06
GO:0044707	single-multicellular organism process	BP	5734	536	4.96993e-10	1.79338e-06
GO:0001501	skeletal system development	BP	469	85	5.79017e-10	1.79338e-06
GO:0030154	cell differentiation	BP	3589	365	1.68798e-09	4.309e-06
GO:0032501	multicellular organismal process	BP	6593	570	1.78871e-09	4.309e-06
GO:0048869	cellular developmental process	BP	3753	376	3.12967e-09	6.78544e-06
GO:0009790	embryo development	BP	920	134	9.73951e-09	1.91966e-05
GO:0007389	pattern specification process	BP	406	73	1.48671e-08	2.68612e-05
GO:0003002	regionalization	BP	322	63	1.83414e-08	3.05891e-05
GO:0009653	anatomical structure morphogenesis	BP	2288	268	2.35598e-08	3.64857e-05
GO:0035295	tube development	BP	556	91	3.23478e-08	4.6268e-05
GO:0022610	biological adhesion	BP	1292	160	3.41446e-08	4.6268e-05
GO:0048598	embryonic morphogenesis	BP	557	93	4.11067e-08	4.97922e-05
GO:0007155	cell adhesion	BP	1286	159	4.13384e-08	4.97922e-05
GO:0048646	anatomical structure formation involved in morphogenesis	BP	937	129	4.44163e-08	5.06837e-05
GO:0009888	tissue development	BP	1783	195	6.80675e-08	7.21812e-05
GO:0060429	epithelium development	BP	1166	135	6.9914e-08	7.21812e-05
GO:0007399	nervous system development	BP	2092	255	9.42637e-08	9.02582e-05
GO:0009887	animal organ morphogenesis	BP	947	131	9.57492e-08	9.02582e-05
GO:0009952	anterior/posterior pattern specification	BP	195	44	1.1893e-07	0.000107439
GO:0007423	sensory organ development	BP	502	80	1.28765e-07	0.00011167
GO:0045595	regulation of cell differentiation	BP	1437	176	1.96607e-07	0.000163947
GO:0048729	tissue morphogenesis	BP	597	90	2.94414e-07	0.000236415
GO:0048562	embryonic organ morphogenesis	BP	279	55	8.94547e-07	0.000692667
GO:0050793	regulation of developmental process	BP	2132	234	1.00382e-06	0.000750479
GO:0008283	cell proliferation	BP	1828	195	1.12107e-06	0.000810201
GO:0048568	embryonic organ development	BP	409	70	1.29232e-06	0.000903832
GO:0098609	cell-cell adhesion	BP	750	99	1.40319e-06	0.000950704
GO:0048513	animal organ development	BP	3072	302	1.54097e-06	0.00101242
GO:0051093	negative regulation of developmental process	BP	773	103	2.22481e-06	0.00141871
GO:0009792	embryo development ending in birth or egg hatching	BP	545	82	2.32446e-06	0.0014399
GO:0070848	response to growth factor	BP	621	88	3.0983e-06	0.00186595
GO:0071363	cellular response to growth factor stimulus	BP	598	85	3.62773e-06	0.00212575
GO:0043009	chordate embryonic development	BP	543	81	4.02514e-06	0.00229655
GO:2000145	regulation of cell motility	BP	691	91	5.23526e-06	0.0029104
GO:0051270	regulation of cellular component movement	BP	756	99	5.92442e-06	0.00321118
GO:0048705	skeletal system morphogenesis	BP	205	42	6.21487e-06	0.00328645
GO:0035239	tube morphogenesis	BP	336	59	7.64531e-06	0.00394662
GO:0043565	sequence-specific DNA binding	MF	915	120	8.54509e-06	0.00430852
GO:0040012	regulation of locomotion	BP	755	97	8.94834e-06	0.00440929
GO:0045596	negative regulation of cell differentiation	BP	584	82	1.00451e-05	0.00483971
GO:0072359	circulatory system development	BP	895	115	1.15403e-05	0.00532568
GO:0001822	kidney development	BP	257	46	1.16334e-05	0.00532568
GO:0042127	regulation of cell proliferation	BP	1450	157	1.18466e-05	0.00532568
GO:0001568	blood vessel development	BP	559	79	1.20363e-05	0.00532568
GO:0001944	vasculature development	BP	581	81	1.27527e-05	0.00552982
GO:0048870	cell motility	BP	1298	146	1.35954e-05	0.00566848
GO:0051674	localization of cell	BP	1298	146	1.35954e-05	0.00566848
GO:0002009	morphogenesis of an epithelium	BP	499	74	1.51668e-05	0.00607176
GO:0007154	cell communication	BP	5739	489	1.53248e-05	0.00607176
GO:0072358	cardiovascular system development	BP	589	82	1.56663e-05	0.00607176
GO:0001655	urogenital system development	BP	306	52	1.56828e-05	0.00607176
GO:0060562	epithelial tube morphogenesis	BP	300	53	1.72922e-05	0.0065774
GO:0048704	embryonic skeletal system morphogenesis	BP	92	25	1.85013e-05	0.00691598
GO:0061448	connective tissue development	BP	229	42	2.24995e-05	0.00826798
GO:0051216	cartilage development	BP	177	35	2.71624e-05	0.00981512
GO:0007156	homophilic cell adhesion via plasma membrane adhesion molecules	BP	150	33	2.93131e-05	0.0104186
GO:0048514	blood vessel morphogenesis	BP	478	68	3.04125e-05	0.010579
GO:0008284	positive regulation of cell proliferation	BP	791	93	3.07402e-05	0.010579
GO:0072001	renal system development	BP	272	47	3.86122e-05	0.0130805
GO:0098742	cell-cell adhesion via plasma-membrane adhesion molecules	BP	221	40	3.95798e-05	0.013202
GO:0090596	sensory organ morphogenesis	BP	243	43	4.07972e-05	0.0134019
GO:0043542	endothelial cell migration	BP	149	30	4.49149e-05	0.0145343
GO:0040011	locomotion	BP	1517	167	4.57288e-05	0.0145801
GO:0090287	regulation of cellular response to growth factor stimulus	BP	227	40	5.86232e-05	0.0184204
GO:2000026	regulation of multicellular organismal development	BP	1628	181	6.44366e-05	0.0199579
GO:0007167	enzyme linked receptor protein signaling pathway	BP	937	114	6.54806e-05	0.0199956
GO:0006928	movement of cell or subcellular component	BP	1754	188	6.95928e-05	0.0209561
GO:0023052	signaling	BP	5720	483	7.34396e-05	0.0218116
GO:0007166	cell surface receptor signaling pathway	BP	2474	242	7.56791e-05	0.0218935
GO:0072073	kidney epithelium development	BP	135	29	7.5735e-05	0.0218935
GO:0030334	regulation of cell migration	BP	643	82	7.75647e-05	0.0221274
GO:0003700	transcription factor activity, sequence-specific DNA binding	MF	1135	127	7.88834e-05	0.0221292
GO:0009966	regulation of signal transduction	BP	2585	254	7.98964e-05	0.0221292
GO:0001071	nucleic acid binding transcription factor activity	MF	1136	127	8.06332e-05	0.0221292
GO:0001654	eye development	BP	330	51	8.2649e-05	0.0223989
GO:0006357	regulation of transcription from RNA polymerase II promoter	BP	1768	188	9.19426e-05	0.02461
GO:0061036	positive regulation of cartilage development	BP	29	11	9.74219e-05	0.0257586
GO:0044700	single organism signaling	BP	5713	481	0.000101647	0.0265201
GO:0019199	transmembrane receptor protein kinase activity	MF	80	21	0.000102748	0.0265201
GO:0072006	nephron development	BP	134	28	0.000117876	0.0300668
GO:0060485	mesenchyme development	BP	228	39	0.000120314	0.0303318
GO:0048706	embryonic skeletal system development	BP	120	28	0.000121836	0.0303624
GO:0019838	growth factor binding	MF	125	26	0.000128896	0.0317568
GO:0060021	palate development	BP	87	21	0.000134709	0.0327699
GO:0000981	RNA polymerase II transcription factor activity, sequence-specific DNA binding	MF	651	86	0.000139391	0.0327699
GO:0005520	insulin-like growth factor binding	MF	28	10	0.000139644	0.0327699
GO:0030855	epithelial cell differentiation	BP	685	71	0.000140229	0.0327699
GO:0010595	positive regulation of endothelial cell migration	BP	68	18	0.000141975	0.0327699
GO:0044699	single-organism process	BP	12286	904	0.000142077	0.0327699
GO:0001525	angiogenesis	BP	398	56	0.000158229	0.0360326
GO:0010594	regulation of endothelial cell migration	BP	114	24	0.000159547	0.0360326
GO:0002062	chondrocyte differentiation	BP	93	22	0.000163215	0.036252
GO:0001823	mesonephros development	BP	98	23	0.000163862	0.036252
GO:0001763	morphogenesis of a branching structure	BP	188	35	0.000177266	0.03847
GO:0044763	single-organism cellular process	BP	9952	774	0.000177436	0.03847
GO:0061138	morphogenesis of a branching epithelium	BP	175	33	0.000185109	0.0397361
GO:0072009	nephron epithelium development	BP	105	23	0.000201852	0.042754
GO:1903507	negative regulation of nucleic acid-templated transcription	BP	1071	121	0.000203112	0.042754
GO:0001657	ureteric bud development	BP	93	22	0.00020806	0.0433744
GO:0045892	negative regulation of transcription, DNA-templated	BP	1039	118	0.000216877	0.0447231
GO:0051148	negative regulation of muscle cell differentiation	BP	56	14	0.000218654	0.0447231
GO:0090132	epithelium migration	BP	224	37	0.000228131	0.0462253
GO:0072163	mesonephric epithelium development	BP	94	22	0.000247261	0.0491823
GO:0072164	mesonephric tubule development	BP	94	22	0.000247261	0.0491823
GO:0048523	negative regulation of cellular process	BP	4072	363	0.000257391	0.0507318
GO:0007165	signal transduction	BP	5234	431	0.00025985	0.0507551
GO:0060993	kidney morphogenesis	BP	87	20	0.000263533	0.0510149
GO:0001945	lymph vessel development	BP	24	9	0.000266642	0.0511598
GO:0016477	cell migration	BP	1174	129	0.000272052	0.0517401
GO:0007178	transmembrane receptor protein serine/threonine kinase signaling pathway	BP	297	45	0.000278743	0.0525516
GO:1902679	negative regulation of RNA biosynthetic process	BP	1085	121	0.000281421	0.052599
GO:0051240	positive regulation of multicellular organismal process	BP	1371	146	0.000300089	0.0556048
GO:0048468	cell development	BP	1815	200	0.000302632	0.0556048
GO:0072089	stem cell proliferation	BP	105	22	0.000346055	0.0630489
GO:0043010	camera-type eye development	BP	286	44	0.000349314	0.0631122
GO:0048522	positive regulation of cellular process	BP	4464	400	0.000360023	0.064295
GO:0061005	cell differentiation involved in kidney development	BP	52	15	0.000363312	0.064295
GO:0001667	ameboidal-type cell migration	BP	303	46	0.000364756	0.064295
GO:0045446	endothelial cell differentiation	BP	89	19	0.000379098	0.0662841
GO:0035850	epithelial cell differentiation involved in kidney development	BP	43	13	0.000384232	0.066422
GO:0010631	epithelial cell migration	BP	222	36	0.000386014	0.066422
GO:0090130	tissue migration	BP	230	37	0.000401088	0.0684724
GO:0072080	nephron tubule development	BP	87	20	0.00041662	0.0705682
GO:0061333	renal tubule morphogenesis	BP	73	18	0.000447091	0.0751425
GO:1902680	positive regulation of RNA biosynthetic process	BP	1322	144	0.000460488	0.0767987
GO:0072171	mesonephric tubule morphogenesis	BP	61	16	0.00048593	0.0804232
GO:0051716	cellular response to stimulus	BP	6356	508	0.000493044	0.0809825
GO:0045893	positive regulation of transcription, DNA-templated	BP	1300	142	0.000524255	0.0848237
GO:1903508	positive regulation of nucleic acid-templated transcription	BP	1300	142	0.000524255	0.0848237
GO:0072078	nephron tubule morphogenesis	BP	69	17	0.000542082	0.0870583
GO:0010646	regulation of cell communication	BP	2875	274	0.000564083	0.0899257
GO:0022612	gland morphogenesis	BP	117	23	0.000593064	0.0938556
GO:0048518	positive regulation of biological process	BP	4959	432	0.000609909	0.094877
GO:0051239	regulation of multicellular organismal process	BP	2526	247	0.000611815	0.094877
GO:0007498	mesoderm development	BP	115	22	0.000612646	0.094877
GO:0061326	renal tubule development	BP	89	20	0.000619674	0.0952847
GO:0048583	regulation of response to stimulus	BP	3392	303	0.000627503	0.095809
GO:0030856	regulation of epithelial cell differentiation	BP	120	21	0.000633397	0.0960327
GO:0005615	extracellular space	CC	1316	105	0.000654594	0.0982921
GO:0072088	nephron epithelium morphogenesis	BP	71	17	0.000657366	0.0982921
GO:0051094	positive regulation of developmental process	BP	1122	126	0.000664103	0.0986193
GO:0071772	response to BMP	BP	147	26	0.000691837	0.101349
GO:0071773	cellular response to BMP stimulus	BP	147	26	0.000691837	0.101349
GO:0001656	metanephros development	BP	85	19	0.000704488	0.10251
GO:0046332	SMAD binding	MF	69	16	0.000718839	0.103901
GO:0043583	ear development	BP	202	34	0.000737102	0.105835
GO:0006366	transcription from RNA polymerase II promoter	BP	1957	196	0.000778055	0.110948
GO:0030198	extracellular matrix organization	BP	302	43	0.000782948	0.110948
GO:0022008	neurogenesis	BP	1383	164	0.000789142	0.1111
GO:0042471	ear morphogenesis	BP	114	23	0.0008102	0.113329
GO:0048699	generation of neurons	BP	1288	155	0.000857681	0.119201
GO:0007507	heart development	BP	488	65	0.000870766	0.120249
GO:0048754	branching morphogenesis of an epithelial tube	BP	143	27	0.000880231	0.120481
GO:0043062	extracellular structure organization	BP	303	43	0.000883561	0.120481
GO:0051254	positive regulation of RNA metabolic process	BP	1370	146	0.000927218	0.125141
GO:0045668	negative regulation of osteoblast differentiation	BP	40	11	0.000929279	0.125141
GO:0072028	nephron morphogenesis	BP	73	17	0.000948318	0.126727
GO:0051253	negative regulation of RNA metabolic process	BP	1129	121	0.0009572	0.126727
GO:0000122	negative regulation of transcription from RNA polymerase II promoter	BP	707	87	0.000958593	0.126727
GO:0070851	growth factor receptor binding	MF	129	19	0.000973929	0.127974
GO:0015012	heparan sulfate proteoglycan biosynthetic process	BP	24	8	0.000990397	0.129309
GO:0003186	tricuspid valve morphogenesis	BP	5	4	0.000996013	0.129309
GO:0023051	regulation of signaling	BP	2925	276	0.0010146	0.130938
GO:0022603	regulation of anatomical structure morphogenesis	BP	890	105	0.00103397	0.132647
GO:0010634	positive regulation of epithelial cell migration	BP	107	21	0.00113001	0.144116
GO:0048762	mesenchymal cell differentiation	BP	179	30	0.0011481	0.145567
GO:0010632	regulation of epithelial cell migration	BP	171	29	0.00115626	0.145749
GO:0060675	ureteric bud morphogenesis	BP	60	15	0.00120818	0.151413
GO:0045667	regulation of osteoblast differentiation	BP	106	20	0.00122204	0.15227
GO:0030509	BMP signaling pathway	BP	138	24	0.00124632	0.154408
GO:1990837	sequence-specific double-stranded DNA binding	MF	635	80	0.00126589	0.155942
GO:0010463	mesenchymal cell proliferation	BP	46	13	0.00135138	0.165532
GO:0050896	response to stimulus	BP	7748	591	0.00140418	0.171034
GO:0003158	endothelium development	BP	107	20	0.00143171	0.173303
GO:0045603	positive regulation of endothelial cell differentiation	BP	16	6	0.00144131	0.173303
GO:0090183	regulation of kidney development	BP	50	13	0.00144768	0.173303
GO:0008375	acetylglucosaminyltransferase activity	MF	44	10	0.00145479	0.173303
GO:0006935	chemotaxis	BP	524	64	0.00154338	0.182064
GO:1904888	cranial skeletal system development	BP	61	15	0.00154512	0.182064
GO:0090092	regulation of transmembrane receptor protein serine/threonine kinase signaling pathway	BP	201	31	0.00156056	0.182097
GO:0045934	negative regulation of nucleobase-containing compound metabolic process	BP	1268	131	0.0015622	0.182097
GO:0042330	taxis	BP	525	64	0.00158582	0.183862
GO:0044212	transcription regulatory region DNA binding	MF	749	92	0.00161465	0.186209
GO:0034330	cell junction organization	BP	244	37	0.00163345	0.187131
GO:0090722	receptor-receptor interaction	MF	4	3	0.00163991	0.187131
GO:0046934	phosphatidylinositol-4,5-bisphosphate 3-kinase activity	MF	65	14	0.00168024	0.189289
GO:1904849	positive regulation of cell chemotaxis to fibroblast growth factor	BP	3	3	0.00168502	0.189289
GO:2000546	positive regulation of endothelial cell chemotaxis to fibroblast growth factor	BP	3	3	0.00168502	0.189289
GO:0060443	mammary gland morphogenesis	BP	44	12	0.00170591	0.190254
GO:0009967	positive regulation of signal transduction	BP	1365	134	0.00171115	0.190254
GO:0000975	regulatory region DNA binding	MF	751	92	0.00172455	0.190765
GO:0001067	regulatory region nucleic acid binding	MF	752	92	0.00184873	0.203099
GO:0004714	transmembrane receptor protein tyrosine kinase activity	MF	64	16	0.00185479	0.203099
GO:0005911	cell-cell junction	CC	386	48	0.00193027	0.209017
GO:0003231	cardiac ventricle development	BP	117	22	0.00195343	0.209017
GO:0071495	cellular response to endogenous stimulus	BP	1185	125	0.00195489	0.209017
GO:0072202	cell differentiation involved in metanephros development	BP	25	8	0.00195524	0.209017
GO:2000611	positive regulation of thyroid hormone generation	BP	3	3	0.00195703	0.209017
GO:0050678	regulation of epithelial cell proliferation	BP	279	38	0.00200471	0.213059
GO:0060389	pathway-restricted SMAD protein phosphorylation	BP	62	12	0.00201626	0.213242
GO:0000977	RNA polymerase II regulatory region sequence-specific DNA binding	MF	523	68	0.00203761	0.214454
GO:0001012	RNA polymerase II regulatory region DNA binding	MF	524	68	0.00207237	0.217058
GO:0003175	tricuspid valve development	BP	6	4	0.00208971	0.217139
GO:0045945	positive regulation of transcription from RNA polymerase III promoter	BP	10	5	0.00209317	0.217139
GO:0061035	regulation of cartilage development	BP	63	14	0.00230169	0.237633
GO:0060231	mesenchymal to epithelial transition	BP	19	7	0.0025142	0.258343
GO:1901342	regulation of vasculature development	BP	231	31	0.00252721	0.258455
GO:0003690	double-stranded DNA binding	MF	709	85	0.00256278	0.260862
GO:0030335	positive regulation of cell migration	BP	379	46	0.00258387	0.26178
GO:0043392	negative regulation of DNA binding	BP	48	10	0.00267186	0.269436
GO:0052813	phosphatidylinositol bisphosphate kinase activity	MF	68	14	0.00271356	0.272373
GO:2000147	positive regulation of cell motility	BP	393	47	0.00288845	0.288592
GO:0050673	epithelial cell proliferation	BP	331	42	0.00293685	0.292082
GO:0061217	regulation of mesonephros development	BP	24	8	0.00297022	0.294052
GO:0001658	branching involved in ureteric bud morphogenesis	BP	55	13	0.00308879	0.304189
GO:0001704	formation of primary germ layer	BP	117	21	0.00311481	0.304189
GO:0048701	embryonic cranial skeleton morphogenesis	BP	44	12	0.00312575	0.304189
GO:0043585	nose morphogenesis	BP	3	3	0.00312874	0.304189
GO:0001570	vasculogenesis	BP	70	14	0.00316671	0.305364
GO:0045165	cell fate commitment	BP	236	37	0.00316899	0.305364
GO:0042803	protein homodimerization activity	MF	699	72	0.00319861	0.306854
GO:0009798	axis specification	BP	83	16	0.00323156	0.307377
GO:0060393	regulation of pathway-restricted SMAD protein phosphorylation	BP	59	11	0.00323241	0.307377
GO:0005913	cell-cell adherens junction	CC	84	16	0.00328802	0.311299
GO:0060541	respiratory system development	BP	192	30	0.00335276	0.316049
GO:0060603	mammary gland duct morphogenesis	BP	30	9	0.00343392	0.322298
GO:0048519	negative regulation of biological process	BP	4504	381	0.00346924	0.324209
GO:0072160	nephron tubule epithelial cell differentiation	BP	14	6	0.00348521	0.324304
GO:0030858	positive regulation of epithelial cell differentiation	BP	54	11	0.00350824	0.325052
GO:0001228	transcriptional activator activity, RNA polymerase II transcription regulatory region sequence-specific binding	MF	344	47	0.00355887	0.32834
GO:0098821	BMP receptor activity	MF	5	3	0.0036566	0.335927
GO:0051272	positive regulation of cellular component movement	BP	403	48	0.00373278	0.340535
GO:0048584	positive regulation of response to stimulus	BP	1889	169	0.00373823	0.340535
GO:0045598	regulation of fat cell differentiation	BP	110	19	0.00376001	0.340535
GO:0051241	negative regulation of multicellular organismal process	BP	953	99	0.00376959	0.340535
GO:0035004	phosphatidylinositol 3-kinase activity	MF	73	14	0.00381307	0.343034
GO:0005160	transforming growth factor beta receptor binding	MF	48	9	0.00407003	0.363618
GO:0003007	heart morphogenesis	BP	228	34	0.00407542	0.363618
GO:0050794	regulation of cellular process	BP	9459	713	0.0043852	0.389654
GO:0009953	dorsal/ventral pattern formation	BP	95	17	0.00441701	0.390878
GO:0010558	negative regulation of macromolecule biosynthetic process	BP	1300	131	0.00447759	0.394628
GO:0060065	uterus development	BP	20	7	0.00450249	0.395217
GO:0045944	positive regulation of transcription from RNA polymerase II promoter	BP	1007	109	0.00462786	0.403313
GO:0023056	positive regulation of signaling	BP	1497	143	0.00463733	0.403313
GO:0048839	inner ear development	BP	177	28	0.00465054	0.403313
GO:0000976	transcription regulatory region sequence-specific DNA binding	MF	600	74	0.00472567	0.406335
GO:0045662	negative regulation of myoblast differentiation	BP	20	6	0.00474009	0.406335
GO:0014065	phosphatidylinositol 3-kinase signaling	BP	161	24	0.00474383	0.406335
GO:0032332	positive regulation of chondrocyte differentiation	BP	19	7	0.00476115	0.406335
GO:0060591	chondroblast differentiation	BP	5	3	0.00477909	0.406335
GO:0010647	positive regulation of cell communication	BP	1489	142	0.00481201	0.407536
GO:0030324	lung development	BP	168	26	0.00484247	0.40852
GO:1901681	sulfur compound binding	MF	217	28	0.00496923	0.416368
GO:1904018	positive regulation of vasculature development	BP	135	20	0.00497391	0.416368
GO:0002040	sprouting angiogenesis	BP	68	14	0.00502023	0.41863
GO:0042659	regulation of cell fate specification	BP	12	5	0.00511188	0.423197
GO:0003281	ventricular septum development	BP	63	14	0.0051186	0.423197
GO:0071526	semaphorin-plexin signaling pathway	BP	20	7	0.00513356	0.423197
GO:0050679	positive regulation of epithelial cell proliferation	BP	157	23	0.00523091	0.428925
GO:0034329	cell junction assembly	BP	189	29	0.00524262	0.428925
GO:0060688	regulation of morphogenesis of a branching structure	BP	51	12	0.00528561	0.430817
GO:0042733	embryonic digit morphogenesis	BP	61	14	0.00543448	0.441292
GO:0016813	hydrolase activity, acting on carbon-nitrogen (but not peptide) bonds, in linear amidines	MF	11	4	0.00547557	0.44297
GO:0042472	inner ear morphogenesis	BP	94	18	0.00556524	0.44855
GO:0048012	hepatocyte growth factor receptor signaling pathway	BP	16	5	0.0056084	0.450355
GO:0061180	mammary gland epithelium development	BP	65	14	0.00581307	0.465067
GO:0048368	lateral mesoderm development	BP	15	5	0.00586077	0.46716
GO:0050789	regulation of biological process	BP	10029	748	0.00588296	0.46721
GO:0019827	stem cell population maintenance	BP	143	22	0.00602191	0.4765
GO:0061156	pulmonary artery morphogenesis	BP	5	3	0.00606033	0.477797
GO:0009948	anterior/posterior axis specification	BP	47	10	0.00614177	0.482463
GO:0048332	mesoderm morphogenesis	BP	69	14	0.00633317	0.495702
GO:0030323	respiratory tube development	BP	172	26	0.00636368	0.496298
GO:0003179	heart valve morphogenesis	BP	34	9	0.00644009	0.500391
GO:0002645	positive regulation of tolerance induction	BP	8	3	0.00646231	0.500391
GO:0001938	positive regulation of endothelial cell proliferation	BP	68	12	0.00652885	0.503744
GO:0005021	vascular endothelial growth factor-activated receptor activity	MF	7	4	0.00667097	0.51267
GO:0072178	nephric duct morphogenesis	BP	11	5	0.00669184	0.51267
GO:0050920	regulation of chemotaxis	BP	164	21	0.00679332	0.518612
GO:0003197	endocardial cushion development	BP	39	9	0.00689495	0.523202
GO:0098727	maintenance of cell number	BP	146	22	0.00692019	0.523202
GO:0042802	identical protein binding	MF	1311	121	0.00697174	0.523202
GO:0060037	pharyngeal system development	BP	25	7	0.00698564	0.523202
GO:0010453	regulation of cell fate commitment	BP	27	7	0.00699519	0.523202
GO:0030201	heparan sulfate proteoglycan metabolic process	BP	30	8	0.00699822	0.523202
GO:0001837	epithelial to mesenchymal transition	BP	124	20	0.00714021	0.527981
GO:2000113	negative regulation of cellular macromolecule biosynthetic process	BP	1229	124	0.00715594	0.527981
GO:0008285	negative regulation of cell proliferation	BP	615	69	0.0071624	0.527981
GO:0090288	negative regulation of cellular response to growth factor stimulus	BP	122	20	0.00716559	0.527981
GO:0010557	positive regulation of macromolecule biosynthetic process	BP	1542	152	0.00720198	0.527981
GO:0010628	positive regulation of gene expression	BP	1637	160	0.00723081	0.527981
GO:0023014	signal transduction by protein phosphorylation	BP	857	86	0.00723262	0.527981
GO:0050954	sensory perception of mechanical stimulus	BP	145	23	0.00744955	0.538595
GO:0001968	fibronectin binding	MF	27	6	0.00745018	0.538595
GO:0009890	negative regulation of biosynthetic process	BP	1392	137	0.00747312	0.538595
GO:0016337	single organismal cell-cell adhesion	BP	564	60	0.00747738	0.538595
GO:0033622	integrin activation	BP	17	5	0.00766266	0.550113
GO:0005044	scavenger receptor activity	MF	42	7	0.00771937	0.550698
GO:0030182	neuron differentiation	BP	1171	136	0.00775543	0.550698
GO:0021915	neural tube development	BP	153	24	0.00780019	0.550698
GO:0036132	13-prostaglandin reductase activity	MF	3	2	0.00781383	0.550698
GO:0047522	15-oxoprostaglandin 13-oxidase activity	MF	3	2	0.00781383	0.550698
GO:0003205	cardiac chamber development	BP	155	25	0.00782321	0.550698
GO:0045597	positive regulation of cell differentiation	BP	809	90	0.00790239	0.554472
GO:0021602	cranial nerve morphogenesis	BP	27	8	0.00797985	0.557266
GO:0018108	peptidyl-tyrosine phosphorylation	BP	353	42	0.00799363	0.557266
GO:0072182	regulation of nephron tubule epithelial cell differentiation	BP	12	5	0.00812718	0.564761
GO:0048844	artery morphogenesis	BP	57	12	0.00818341	0.564936
GO:2000137	negative regulation of cell proliferation involved in heart morphogenesis	BP	2	2	0.00819455	0.564936
GO:0045935	positive regulation of nucleobase-containing compound metabolic process	BP	1616	158	0.00822901	0.564936
GO:0098602	single organism cell adhesion	BP	618	65	0.00823393	0.564936
GO:0050919	negative chemotaxis	BP	21	7	0.00829559	0.565983
GO:0009799	specification of symmetry	BP	119	18	0.0083014	0.565983
GO:0038084	vascular endothelial growth factor signaling pathway	BP	24	7	0.00842585	0.571635
GO:0030513	positive regulation of BMP signaling pathway	BP	31	8	0.00843703	0.571635
GO:0045823	positive regulation of heart contraction	BP	32	7	0.00857513	0.573784
GO:0001701	in utero embryonic development	BP	298	37	0.00862164	0.573784
GO:0048566	embryonic digestive tract development	BP	34	9	0.00862695	0.573784
GO:0008045	motor neuron axon guidance	BP	24	8	0.00867101	0.573784
GO:0008083	growth factor activity	MF	153	18	0.00867721	0.573784
GO:0030326	embryonic limb morphogenesis	BP	124	23	0.00867933	0.573784
GO:0035113	embryonic appendage morphogenesis	BP	124	23	0.00867933	0.573784
GO:0004115	3',5'-cyclic-AMP phosphodiesterase activity	MF	15	6	0.00868047	0.573784
GO:0001946	lymphangiogenesis	BP	16	5	0.00872635	0.575064
GO:0004713	protein tyrosine kinase activity	MF	175	26	0.00882679	0.57992
GO:0061061	muscle structure development	BP	558	67	0.00889267	0.582484
GO:0006853	carnitine shuttle	BP	10	4	0.00903324	0.589908
GO:0032835	glomerulus development	BP	61	13	0.00919013	0.59729
GO:0045600	positive regulation of fat cell differentiation	BP	54	10	0.00920137	0.59729
GO:0018212	peptidyl-tyrosine modification	BP	355	42	0.00927164	0.600055
GO:0035270	endocrine system development	BP	122	21	0.00945328	0.60999
GO:0060537	muscle tissue development	BP	341	44	0.00951866	0.612386
GO:0003279	cardiac septum development	BP	96	18	0.00970892	0.620966
GO:0003148	outflow tract septum morphogenesis	BP	22	7	0.00970931	0.620966
GO:0017124	SH3 domain binding	MF	113	18	0.00978604	0.624033
GO:0007517	muscle organ development	BP	340	44	0.00982052	0.624395
GO:0048585	negative regulation of response to stimulus	BP	1315	126	0.00994295	0.628846
GO:0043167	ion binding	MF	5689	454	0.00996044	0.628846
GO:0030166	proteoglycan biosynthetic process	BP	56	11	0.00997754	0.628846
GO:0034041	sterol-transporting ATPase activity	MF	2	2	0.010072	0.629887
GO:0005916	fascia adherens	CC	10	4	0.0100786	0.629887
GO:0045216	cell-cell junction organization	BP	217	31	0.0101024	0.629887
GO:0040017	positive regulation of locomotion	BP	421	47	0.0101103	0.629887
GO:0070740	tubulin-glutamic acid ligase activity	MF	3	2	0.0101807	0.632458
GO:0002508	central tolerance induction	BP	2	2	0.0102272	0.633534
GO:2000677	regulation of transcription regulatory region DNA binding	BP	44	9	0.0102831	0.633736
GO:0042474	middle ear morphogenesis	BP	20	6	0.010289	0.633736
GO:0001503	ossification	BP	357	44	0.0103321	0.634593
GO:0007369	gastrulation	BP	173	26	0.0104373	0.639239
GO:2001046	positive regulation of integrin-mediated signaling pathway	BP	5	3	0.0106206	0.647395
GO:0045766	positive regulation of angiogenesis	BP	118	17	0.0106302	0.647395
GO:1902731	negative regulation of chondrocyte proliferation	BP	3	2	0.0107022	0.649955
GO:0003206	cardiac chamber morphogenesis	BP	119	20	0.0107456	0.65006
GO:0010862	positive regulation of pathway-restricted SMAD protein phosphorylation	BP	47	8	0.0107732	0.65006
GO:0071711	basement membrane organization	BP	20	6	0.0107939	0.65006
GO:0071559	response to transforming growth factor beta	BP	211	29	0.0109709	0.65533
GO:1901252	regulation of intracellular transport of viral material	BP	2	2	0.010972	0.65533
GO:1901253	negative regulation of intracellular transport of viral material	BP	2	2	0.010972	0.65533
GO:2001141	regulation of RNA biosynthetic process	BP	3358	282	0.0110265	0.656774
GO:0004675	transmembrane receptor protein serine/threonine kinase activity	MF	16	5	0.0111925	0.664834
GO:0035107	appendage morphogenesis	BP	143	25	0.0112948	0.667253
GO:0035108	limb morphogenesis	BP	143	25	0.0112948	0.667253
GO:0001707	mesoderm formation	BP	67	13	0.0113498	0.668682
GO:1903506	regulation of nucleic acid-templated transcription	BP	3340	281	0.0114813	0.674597
GO:0061298	retina vasculature development in camera-type eye	BP	15	5	0.0115258	0.675378
GO:0005088	Ras guanyl-nucleotide exchange factor activity	MF	237	34	0.0116239	0.679296
GO:0003278	apoptotic process involved in heart morphogenesis	BP	6	3	0.0116985	0.681814
GO:0001885	endothelial cell development	BP	51	10	0.0117317	0.68192
GO:0019904	protein domain specific binding	MF	627	71	0.0117734	0.682511
GO:0006029	proteoglycan metabolic process	BP	80	14	0.0118259	0.683726
GO:0007179	transforming growth factor beta receptor signaling pathway	BP	164	23	0.0119361	0.68826
GO:0098770	FBXO family protein binding	MF	2	2	0.0120183	0.691162
GO:0001077	transcriptional activator activity, RNA polymerase II core promoter proximal region sequence-specific binding	MF	249	34	0.012105	0.693519
GO:0051057	positive regulation of small GTPase mediated signal transduction	BP	49	9	0.0121232	0.693519
GO:0006355	regulation of transcription, DNA-templated	BP	3319	279	0.0122664	0.699862
GO:0090102	cochlea development	BP	45	10	0.0123575	0.703207
GO:0030155	regulation of cell adhesion	BP	617	65	0.0124762	0.703589
GO:0035025	positive regulation of Rho protein signal transduction	BP	23	5	0.0125147	0.703589
GO:0002514	B cell tolerance induction	BP	2	2	0.0125264	0.703589
GO:0002661	regulation of B cell tolerance induction	BP	2	2	0.0125264	0.703589
GO:0002663	positive regulation of B cell tolerance induction	BP	2	2	0.0125264	0.703589
GO:0033559	unsaturated fatty acid metabolic process	BP	93	11	0.0127311	0.713239
GO:0032526	response to retinoic acid	BP	105	16	0.0128104	0.715832
GO:0060896	neural plate pattern specification	BP	9	4	0.0129304	0.720681
GO:0001886	endothelial cell morphogenesis	BP	9	4	0.0130433	0.723931
GO:0002064	epithelial cell development	BP	185	26	0.0130555	0.723931
GO:0004114	3',5'-cyclic-nucleotide phosphodiesterase activity	MF	24	7	0.0131186	0.725205
GO:0009968	negative regulation of signal transduction	BP	1062	106	0.0131479	0.725205
GO:0014706	striated muscle tissue development	BP	327	42	0.0131789	0.725205
GO:0004872	receptor activity	MF	1442	101	0.0133071	0.72845
GO:0060089	molecular transducer activity	MF	1442	101	0.0133071	0.72845
GO:0009719	response to endogenous stimulus	BP	1524	144	0.0133449	0.72845
GO:0007158	neuron cell-cell adhesion	BP	12	5	0.0133722	0.72845
GO:0038024	cargo receptor activity	MF	62	9	0.0134426	0.729986
GO:0005126	cytokine receptor binding	MF	243	22	0.0134678	0.729986
GO:0071310	cellular response to organic substance	BP	2132	187	0.0135308	0.731572
GO:0046811	histone deacetylase inhibitor activity	MF	2	2	0.0136183	0.734474
GO:0035766	cell chemotaxis to fibroblast growth factor	BP	6	3	0.0138497	0.739036
GO:0035768	endothelial cell chemotaxis to fibroblast growth factor	BP	6	3	0.0138497	0.739036
GO:1904847	regulation of cell chemotaxis to fibroblast growth factor	BP	6	3	0.0138497	0.739036
GO:2000544	regulation of endothelial cell chemotaxis to fibroblast growth factor	BP	6	3	0.0138497	0.739036
GO:0060932	His-Purkinje system cell differentiation	BP	2	2	0.0138733	0.739036
GO:0003338	metanephros morphogenesis	BP	31	8	0.0139476	0.740946
GO:0035729	cellular response to hepatocyte growth factor stimulus	BP	15	4	0.0139775	0.740946
GO:0072087	renal vesicle development	BP	19	6	0.0141444	0.743155
GO:0032924	activin receptor signaling pathway	BP	38	8	0.014195	0.743155
GO:0048010	vascular endothelial growth factor receptor signaling pathway	BP	89	15	0.0142671	0.743155
GO:0005539	glycosaminoglycan binding	MF	197	24	0.0143354	0.743155
GO:0042101	T cell receptor complex	CC	19	5	0.0143571	0.743155
GO:0001935	endothelial cell proliferation	BP	109	16	0.0143768	0.743155
GO:0051764	actin crosslink formation	BP	10	4	0.014389	0.743155
GO:0090184	positive regulation of kidney development	BP	37	9	0.0144224	0.743155
GO:0048389	intermediate mesoderm development	BP	2	2	0.0144269	0.743155
GO:0061227	pattern specification involved in mesonephros development	BP	2	2	0.0144269	0.743155
GO:0072098	anterior/posterior pattern specification involved in kidney development	BP	2	2	0.0144269	0.743155
GO:0072102	glomerulus morphogenesis	BP	8	4	0.0144864	0.743155
GO:0048736	appendage development	BP	166	27	0.0144991	0.743155
GO:0060173	limb development	BP	166	27	0.0144991	0.743155
GO:2000609	regulation of thyroid hormone generation	BP	5	3	0.0146939	0.74995
GO:0050840	extracellular matrix binding	MF	49	9	0.0147008	0.74995
GO:1905314	semi-lunar valve development	BP	16	5	0.0147465	0.750513
GO:0072210	metanephric nephron development	BP	38	9	0.0148113	0.752045
GO:0010764	negative regulation of fibroblast migration	BP	7	3	0.0148911	0.753466
GO:0061312	BMP signaling pathway involved in heart development	BP	6	3	0.0149285	0.753466
GO:0071560	cellular response to transforming growth factor beta stimulus	BP	209	28	0.0149572	0.753466
GO:0034040	lipid-transporting ATPase activity	MF	3	2	0.0149783	0.753466
GO:0030029	actin filament-based process	BP	639	72	0.0150425	0.754803
GO:0042461	photoreceptor cell development	BP	40	7	0.0150745	0.754803
GO:0090100	positive regulation of transmembrane receptor protein serine/threonine kinase signaling pathway	BP	96	15	0.0151867	0.758246
GO:0036303	lymph vessel morphogenesis	BP	18	5	0.0152132	0.758246
GO:0007162	negative regulation of cell adhesion	BP	218	26	0.0153775	0.761894
GO:2001222	regulation of neuron migration	BP	26	7	0.0154381	0.761894
GO:0090189	regulation of branching involved in ureteric bud morphogenesis	BP	21	6	0.015483	0.761894
GO:0051172	negative regulation of nitrogen compound metabolic process	BP	1409	135	0.015495	0.761894
GO:0003208	cardiac ventricle morphogenesis	BP	71	13	0.0154955	0.761894
GO:0009855	determination of bilateral symmetry	BP	118	17	0.0154972	0.761894
GO:0072111	cell proliferation involved in kidney development	BP	19	6	0.0155965	0.765041
GO:0043547	positive regulation of GTPase activity	BP	603	68	0.0156942	0.768094
GO:0046579	positive regulation of Ras protein signal transduction	BP	43	8	0.0157699	0.770063
GO:0007266	Rho protein signal transduction	BP	154	22	0.0158688	0.773151
GO:0007411	axon guidance	BP	214	35	0.0159268	0.774234
GO:0072176	nephric duct development	BP	14	5	0.0159855	0.775353
GO:0005201	extracellular matrix structural constituent	MF	70	12	0.0161635	0.782234
GO:0030217	T cell differentiation	BP	209	25	0.0162376	0.782772
GO:0007605	sensory perception of sound	BP	130	20	0.0162809	0.782772
GO:1903035	negative regulation of response to wounding	BP	74	12	0.0162829	0.782772
GO:0003382	epithelial cell morphogenesis	BP	26	7	0.0166741	0.797769
GO:0003170	heart valve development	BP	38	9	0.0166881	0.797769
GO:1903845	negative regulation of cellular response to transforming growth factor beta stimulus	BP	66	12	0.0167099	0.797769
GO:0060836	lymphatic endothelial cell differentiation	BP	7	3	0.0167421	0.797769
GO:0001708	cell fate specification	BP	76	14	0.0168148	0.798313
GO:0010812	negative regulation of cell-substrate adhesion	BP	49	10	0.0168271	0.798313
GO:0050982	detection of mechanical stimulus	BP	41	8	0.0168744	0.798808
GO:0032330	regulation of chondrocyte differentiation	BP	46	10	0.0169823	0.800877
GO:0048732	gland development	BP	406	49	0.016992	0.800877
GO:0030510	regulation of BMP signaling pathway	BP	78	14	0.0170405	0.801423
GO:0004112	cyclic-nucleotide phosphodiesterase activity	MF	25	7	0.0170997	0.801494
GO:0031327	negative regulation of cellular biosynthetic process	BP	1371	132	0.0171556	0.801494
GO:0035023	regulation of Rho protein signal transduction	BP	113	18	0.0171756	0.801494
GO:0030279	negative regulation of ossification	BP	69	12	0.0172516	0.801494
GO:0050767	regulation of neurogenesis	BP	639	79	0.0172585	0.801494
GO:0003181	atrioventricular valve morphogenesis	BP	21	6	0.0172639	0.801494
GO:0090101	negative regulation of transmembrane receptor protein serine/threonine kinase signaling pathway	BP	101	16	0.0174067	0.806399
GO:0005509	calcium ion binding	MF	665	70	0.0175551	0.808134
GO:0051173	positive regulation of nitrogen compound metabolic process	BP	1714	163	0.0175806	0.808134
GO:0048318	axial mesoderm development	BP	8	3	0.0176102	0.808134
GO:1902285	semaphorin-plexin signaling pathway involved in neuron projection guidance	BP	5	3	0.0176177	0.808134
GO:0060841	venous blood vessel development	BP	16	5	0.0176661	0.808134
GO:0048372	lateral mesodermal cell fate commitment	BP	2	2	0.0177627	0.808134
GO:0048377	lateral mesodermal cell fate specification	BP	2	2	0.0177627	0.808134
GO:0048378	regulation of lateral mesodermal cell fate specification	BP	2	2	0.0177627	0.808134
GO:0005102	receptor binding	MF	1366	118	0.0178473	0.808134
GO:0001936	regulation of endothelial cell proliferation	BP	94	14	0.0178695	0.808134
GO:0014066	regulation of phosphatidylinositol 3-kinase signaling	BP	143	20	0.017912	0.808134
GO:0055123	digestive system development	BP	135	22	0.0179541	0.808134
GO:2000696	regulation of epithelial cell differentiation involved in kidney development	BP	15	5	0.018024	0.808134
GO:0044421	extracellular region part	CC	3594	262	0.0180695	0.808134
GO:0003151	outflow tract morphogenesis	BP	69	13	0.0180752	0.808134
GO:0034987	immunoglobulin receptor binding	MF	5	2	0.0180905	0.808134
GO:0061213	positive regulation of mesonephros development	BP	20	6	0.0180962	0.808134
GO:0048015	phosphatidylinositol-mediated signaling	BP	201	26	0.0181151	0.808134
GO:0043408	regulation of MAPK cascade	BP	631	63	0.0182406	0.812064
GO:0005172	vascular endothelial growth factor receptor binding	MF	10	3	0.0183176	0.812889
GO:0046578	regulation of Ras protein signal transduction	BP	187	27	0.0183342	0.812889
GO:2000027	regulation of organ morphogenesis	BP	238	31	0.018493	0.818261
GO:0008201	heparin binding	MF	150	19	0.0185594	0.819526
GO:0045765	regulation of angiogenesis	BP	207	25	0.0187312	0.823199
GO:0061626	pharyngeal arch artery morphogenesis	BP	7	3	0.0187348	0.823199
GO:0043087	regulation of GTPase activity	BP	655	73	0.0187579	0.823199
GO:0010717	regulation of epithelial to mesenchymal transition	BP	74	13	0.0187945	0.823199
GO:0061458	reproductive system development	BP	396	44	0.0190086	0.8309
GO:0097485	neuron projection guidance	BP	216	35	0.0191528	0.832469
GO:0097168	mesenchymal stem cell proliferation	BP	2	2	0.0191974	0.832469
GO:0072498	embryonic skeletal joint development	BP	14	5	0.0192975	0.832469
GO:0003222	ventricular trabecula myocardium morphogenesis	BP	16	5	0.0193094	0.832469
GO:0048592	eye morphogenesis	BP	138	21	0.0193528	0.832469
GO:0007417	central nervous system development	BP	854	98	0.0193547	0.832469
GO:0009101	glycoprotein biosynthetic process	BP	332	34	0.019383	0.832469
GO:0045580	regulation of T cell differentiation	BP	113	15	0.0193975	0.832469
GO:0010460	positive regulation of heart rate	BP	22	5	0.0194314	0.832469
GO:0042571	immunoglobulin complex, circulating	CC	2	1	0.0194401	0.832469
GO:0060413	atrial septum morphogenesis	BP	16	5	0.0194669	0.832469
GO:1902531	regulation of intracellular signal transduction	BP	1615	146	0.0197127	0.841322
GO:0002517	T cell tolerance induction	BP	12	3	0.0197577	0.841586
GO:0030278	regulation of ossification	BP	176	24	0.019867	0.84349
GO:0090103	cochlea morphogenesis	BP	23	6	0.0199274	0.84349
GO:0006198	cAMP catabolic process	BP	19	6	0.0199568	0.84349
GO:2001028	positive regulation of endothelial cell chemotaxis	BP	11	4	0.0200341	0.84349
GO:0071364	cellular response to epidermal growth factor stimulus	BP	39	8	0.0200693	0.84349
GO:0051586	positive regulation of dopamine uptake involved in synaptic transmission	BP	3	2	0.0201004	0.84349
GO:0051944	positive regulation of catecholamine uptake involved in synaptic transmission	BP	3	2	0.0201004	0.84349
GO:0072283	metanephric renal vesicle morphogenesis	BP	15	5	0.0201484	0.84349
GO:0035988	chondrocyte proliferation	BP	14	4	0.0201526	0.84349
GO:0001101	response to acid chemical	BP	308	35	0.0203276	0.848318
GO:1900736	regulation of phospholipase C-activating G-protein coupled receptor signaling pathway	BP	4	2	0.0203462	0.848318
GO:0051599	response to hydrostatic pressure	BP	6	3	0.0204976	0.852433
GO:0044459	plasma membrane part	CC	2390	209	0.0205454	0.852433
GO:0060444	branching involved in mammary gland duct morphogenesis	BP	22	6	0.0205877	0.852433
GO:2000272	negative regulation of receptor activity	BP	33	6	0.0206021	0.852433
GO:0097108	hedgehog family protein binding	MF	3	2	0.0207718	0.855986
GO:0035268	protein mannosylation	BP	20	4	0.0208369	0.855986
GO:0003215	cardiac right ventricle morphogenesis	BP	19	6	0.0208449	0.855986
GO:0021545	cranial nerve development	BP	48	10	0.0208459	0.855986
GO:0051497	negative regulation of stress fiber assembly	BP	17	5	0.0210116	0.86116
GO:0086091	regulation of heart rate by cardiac conduction	BP	34	8	0.0212334	0.868327
GO:0035033	histone deacetylase regulator activity	MF	3	2	0.0213322	0.868327
GO:0046530	photoreceptor cell differentiation	BP	55	9	0.0213376	0.868327
GO:0033791	3alpha,7alpha,12alpha-trihydroxy-5beta-cholestanoyl-CoA 24-hydroxylase activity	MF	1	1	0.0213796	0.868327
GO:0070887	cellular response to chemical stimulus	BP	2578	216	0.0214054	0.868327
GO:0072166	posterior mesonephric tubule development	BP	2	2	0.0214415	0.868327
GO:0000982	transcription factor activity, RNA polymerase II core promoter proximal region sequence-specific binding	MF	358	45	0.0214973	0.868327
GO:0005576	extracellular region	CC	4288	302	0.0215069	0.868327
GO:0048017	inositol lipid-mediated signaling	BP	204	26	0.0216161	0.868913
GO:0030258	lipid modification	BP	261	29	0.0216672	0.868913
GO:0034155	regulation of toll-like receptor 7 signaling pathway	BP	1	1	0.0217194	0.868913
GO:0034157	positive regulation of toll-like receptor 7 signaling pathway	BP	1	1	0.0217194	0.868913
GO:0001649	osteoblast differentiation	BP	198	27	0.0217476	0.868913
GO:0007044	cell-substrate junction assembly	BP	84	15	0.0217619	0.868913
GO:1905332	positive regulation of morphogenesis of an epithelium	BP	29	7	0.0218504	0.870842
GO:0090575	RNA polymerase II transcription factor complex	CC	109	15	0.0219073	0.871509
GO:0043407	negative regulation of MAP kinase activity	BP	69	11	0.0220789	0.876725
GO:0010667	negative regulation of cardiac muscle cell apoptotic process	BP	17	5	0.0223736	0.885694
GO:0005130	granulocyte colony-stimulating factor receptor binding	MF	1	1	0.0223905	0.885694
GO:0045217	cell-cell junction maintenance	BP	6	3	0.0224358	0.885694
GO:0048645	animal organ formation	BP	57	12	0.0224681	0.885694
GO:0060665	regulation of branching involved in salivary gland morphogenesis by mesenchymal-epithelial signaling	BP	4	2	0.0225975	0.889179
GO:0019372	lipoxygenase pathway	BP	16	4	0.0226809	0.890111
GO:0055024	regulation of cardiac muscle tissue development	BP	65	12	0.0227236	0.890111
GO:0051895	negative regulation of focal adhesion assembly	BP	14	5	0.0227708	0.890111
GO:0032440	2-alkenal reductase [NAD(P)] activity	MF	1	1	0.0228041	0.890111
GO:0046834	lipid phosphorylation	BP	110	16	0.0228265	0.890111
GO:0016758	transferase activity, transferring hexosyl groups	MF	192	21	0.0229718	0.894168
GO:0016327	apicolateral plasma membrane	CC	19	4	0.023026	0.894673
GO:0043235	receptor complex	CC	307	37	0.0231113	0.895731
GO:1901798	positive regulation of signal transduction by p53 class mediator	BP	19	5	0.0231359	0.895731
GO:0021532	neural tube patterning	BP	38	8	0.0234876	0.907728
GO:0035728	response to hepatocyte growth factor	BP	17	4	0.0236366	0.911861
GO:0002043	blood vessel endothelial cell proliferation involved in sprouting angiogenesis	BP	11	4	0.0236841	0.912069
GO:0060043	regulation of cardiac muscle cell proliferation	BP	34	8	0.0237931	0.914641
GO:0044798	nuclear transcription factor complex	CC	134	17	0.0238457	0.915043
GO:0086069	bundle of His cell to Purkinje myocyte communication	BP	14	4	0.0239586	0.915684
GO:0005025	transforming growth factor beta receptor activity, type I	MF	4	2	0.023965	0.915684
GO:0030903	notochord development	BP	18	5	0.0241004	0.915684
GO:0006351	transcription, DNA-templated	BP	3472	286	0.0242282	0.915684
GO:0065007	biological regulation	BP	10608	776	0.0242441	0.915684
GO:0048608	reproductive structure development	BP	393	43	0.0242776	0.915684
GO:0035981	tongue muscle cell differentiation	BP	2	2	0.0243117	0.915684
GO:1902811	positive regulation of skeletal muscle fiber differentiation	BP	2	2	0.0243117	0.915684
GO:2001035	regulation of tongue muscle cell differentiation	BP	2	2	0.0243117	0.915684
GO:2001037	positive regulation of tongue muscle cell differentiation	BP	2	2	0.0243117	0.915684
GO:0038023	signaling receptor activity	MF	1207	82	0.0243804	0.915684
GO:0004702	signal transducer, downstream of receptor, with serine/threonine kinase activity	MF	85	13	0.0243945	0.915684
GO:0035137	hindlimb morphogenesis	BP	35	9	0.0244115	0.915684
GO:0061032	visceral serous pericardium development	BP	2	2	0.0245909	0.919752
GO:0072284	metanephric S-shaped body morphogenesis	BP	6	3	0.0246048	0.919752
GO:0048532	anatomical structure arrangement	BP	16	5	0.0246791	0.92044
GO:0004997	thyrotropin-releasing hormone receptor activity	MF	1	1	0.0247081	0.92044
GO:0018095	protein polyglutamylation	BP	9	3	0.0247653	0.92099
GO:0072215	regulation of metanephros development	BP	21	6	0.0248296	0.921739
GO:0048738	cardiac muscle tissue development	BP	183	25	0.0249301	0.921739
GO:0097284	hepatocyte apoptotic process	BP	14	4	0.0250055	0.921739
GO:0097659	nucleic acid-templated transcription	BP	3488	287	0.0250234	0.921739
GO:0050680	negative regulation of epithelial cell proliferation	BP	109	16	0.0250279	0.921739
GO:0003006	developmental process involved in reproduction	BP	591	58	0.0250405	0.921739
GO:0045581	negative regulation of T cell differentiation	BP	31	6	0.0253007	0.929737
GO:0021512	spinal cord anterior/posterior patterning	BP	1	1	0.0254825	0.932082
GO:0003337	mesenchymal to epithelial transition involved in metanephros morphogenesis	BP	12	4	0.0255181	0.932082
GO:0072207	metanephric epithelium development	BP	26	6	0.0255297	0.932082
GO:0021546	rhombomere development	BP	7	3	0.0255365	0.932082
GO:0071944	cell periphery	CC	4805	373	0.0255799	0.932096
GO:0009611	response to wounding	BP	608	62	0.0257611	0.937126
GO:0046872	metal ion binding	MF	3821	309	0.0259489	0.942374
GO:0007494	midgut development	BP	10	4	0.0260506	0.944485
GO:0032530	regulation of microvillus organization	BP	13	4	0.026245	0.949947
GO:0072132	mesenchyme morphogenesis	BP	46	9	0.0264919	0.957284
GO:0001502	cartilage condensation	BP	21	5	0.0266379	0.960958
GO:0008194	UDP-glycosyltransferase activity	MF	132	17	0.0268324	0.965002
GO:0060348	bone development	BP	175	25	0.026878	0.965002
GO:0051017	actin filament bundle assembly	BP	125	19	0.0268835	0.965002
GO:0045599	negative regulation of fat cell differentiation	BP	43	9	0.0269779	0.966789
GO:0048485	sympathetic nervous system development	BP	21	6	0.0270886	0.968278
GO:0060349	bone morphogenesis	BP	85	15	0.0271088	0.968278
GO:0046854	phosphatidylinositol phosphorylation	BP	98	14	0.0273338	0.968993
GO:0009612	response to mechanical stimulus	BP	199	24	0.0273719	0.968993
GO:0001676	long-chain fatty acid metabolic process	BP	86	10	0.0273937	0.968993
GO:2000683	regulation of cellular response to X-ray	BP	2	2	0.0274068	0.968993
GO:0040007	growth	BP	881	91	0.027422	0.968993
GO:0014916	regulation of lung blood pressure	BP	3	2	0.0274626	0.968993
GO:0021644	vagus nerve morphogenesis	BP	2	2	0.0274715	0.968993
GO:0009605	response to external stimulus	BP	1920	159	0.0275199	0.968993
GO:0060840	artery development	BP	78	14	0.0275548	0.968993
GO:0003272	endocardial cushion formation	BP	22	5	0.0275757	0.968993
GO:0030512	negative regulation of transforming growth factor beta receptor signaling pathway	BP	64	11	0.027734	0.972977
GO:0010665	regulation of cardiac muscle cell apoptotic process	BP	25	6	0.027801	0.973364
GO:0051056	regulation of small GTPase mediated signal transduction	BP	274	35	0.0278348	0.973364
GO:1903392	negative regulation of adherens junction organization	BP	15	5	0.0280668	0.977796
GO:0005085	guanyl-nucleotide exchange factor activity	MF	306	39	0.0281006	0.977796
GO:0098743	cell aggregation	BP	22	5	0.0281035	0.977796
GO:0090185	negative regulation of kidney development	BP	17	5	0.0281445	0.977796
GO:0003680	AT DNA binding	MF	8	3	0.0281926	0.977796
GO:0050957	equilibrioception	BP	7	3	0.0283262	0.977796
GO:0002373	plasmacytoid dendritic cell cytokine production	BP	1	1	0.0283674	0.977796
GO:0002736	regulation of plasmacytoid dendritic cell cytokine production	BP	1	1	0.0283674	0.977796
GO:0002737	negative regulation of plasmacytoid dendritic cell cytokine production	BP	1	1	0.0283674	0.977796
GO:0007169	transmembrane receptor protein tyrosine kinase signaling pathway	BP	659	70	0.0284171	0.977955
GO:1903844	regulation of cellular response to transforming growth factor beta stimulus	BP	98	15	0.028674	0.98523
GO:0051960	regulation of nervous system development	BP	723	86	0.0287379	0.985864
GO:0007548	sex differentiation	BP	244	28	0.0289834	0.992716
GO:0033077	T cell differentiation in thymus	BP	66	11	0.0291859	0.998076
GO:1901019	regulation of calcium ion transmembrane transporter activity	BP	72	11	0.0294018	1
GO:0060684	epithelial-mesenchymal cell signaling	BP	7	3	0.0294146	1
GO:0071901	negative regulation of protein serine/threonine kinase activity	BP	121	17	0.0294253	1
GO:0031344	regulation of cell projection organization	BP	516	63	0.0294903	1
GO:0072190	ureter urothelium development	BP	3	2	0.0295019	1
GO:0010648	negative regulation of cell communication	BP	1162	111	0.0296023	1
GO:0042789	mRNA transcription from RNA polymerase II promoter	BP	17	4	0.0296698	1
GO:0070412	R-SMAD binding	MF	23	6	0.0297081	1
GO:0033085	negative regulation of T cell differentiation in thymus	BP	8	3	0.0297858	1
GO:0060795	cell fate commitment involved in formation of primary germ layer	BP	35	7	0.029864	1
GO:0048565	digestive tract development	BP	124	20	0.0300183	1
GO:0070849	response to epidermal growth factor	BP	43	8	0.0300412	1
GO:0031012	extracellular matrix	CC	500	52	0.0300597	1
GO:0051154	negative regulation of striated muscle cell differentiation	BP	29	6	0.0304404	1
GO:0001675	acrosome assembly	BP	14	3	0.0304621	1
GO:0007495	visceral mesoderm-endoderm interaction involved in midgut development	BP	1	1	0.03048	1
GO:0030947	regulation of vascular endothelial growth factor receptor signaling pathway	BP	26	6	0.0304918	1
GO:1901723	negative regulation of cell proliferation involved in kidney development	BP	6	3	0.0305314	1
GO:0031064	negative regulation of histone deacetylation	BP	4	2	0.0305607	1
GO:0031994	insulin-like growth factor I binding	MF	12	4	0.0305768	1
GO:0060395	SMAD protein signal transduction	BP	54	9	0.0306917	1
GO:0031226	intrinsic component of plasma membrane	CC	1511	130	0.0309638	1
GO:0033623	regulation of integrin activation	BP	10	3	0.0310046	1
GO:0004720	protein-lysine 6-oxidase activity	MF	3	2	0.0310062	1
GO:0060284	regulation of cell development	BP	744	86	0.0310105	1
GO:0002666	positive regulation of T cell tolerance induction	BP	6	2	0.0311667	1
GO:0071926	endocannabinoid signaling pathway	BP	3	2	0.0316348	1
GO:0023057	negative regulation of signaling	BP	1166	111	0.0317869	1
GO:0021612	facial nerve structural organization	BP	7	3	0.0318077	1
GO:0050508	glucuronosyl-N-acetylglucosaminyl-proteoglycan 4-alpha-N-acetylglucosaminyltransferase activity	MF	3	2	0.0318943	1
GO:0008594	photoreceptor cell morphogenesis	BP	1	1	0.0320358	1
GO:0051146	striated muscle cell differentiation	BP	237	30	0.0320812	1
GO:0003171	atrioventricular valve development	BP	24	6	0.032133	1
GO:0061689	tricellular tight junction	CC	4	2	0.032251	1
GO:0005057	signal transducer activity, downstream of receptor	MF	136	18	0.0322668	1
GO:0060897	neural plate regionalization	BP	7	3	0.0323001	1
GO:0032989	cellular component morphogenesis	BP	947	106	0.0324976	1
GO:0010033	response to organic substance	BP	2717	224	0.0325941	1
GO:0043517	positive regulation of DNA damage response, signal transduction by p53 class mediator	BP	13	4	0.0326066	1
GO:0001710	mesodermal cell fate commitment	BP	19	5	0.0326457	1
GO:0072311	glomerular epithelial cell differentiation	BP	19	5	0.0326634	1
GO:0035912	dorsal aorta morphogenesis	BP	8	3	0.0327607	1
GO:0007500	mesodermal cell fate determination	BP	3	2	0.0328326	1
GO:0000900	translation repressor activity, nucleic acid binding	MF	13	4	0.0331896	1
GO:0050839	cell adhesion molecule binding	MF	439	47	0.0333487	1
GO:0072257	metanephric nephron tubule epithelial cell differentiation	BP	7	3	0.0334004	1
GO:0072307	regulation of metanephric nephron tubule epithelial cell differentiation	BP	7	3	0.0334004	1
GO:0002053	positive regulation of mesenchymal cell proliferation	BP	27	7	0.0334782	1
GO:0000789	cytoplasmic chromatin	CC	1	1	0.0335023	1
GO:0033081	regulation of T cell differentiation in thymus	BP	23	5	0.033511	1
GO:0003203	endocardial cushion morphogenesis	BP	29	6	0.0335778	1
GO:0004364	glutathione transferase activity	MF	22	3	0.0335895	1
GO:0098631	protein binding involved in cell adhesion	MF	37	7	0.0336219	1
GO:1902204	positive regulation of hepatocyte growth factor receptor signaling pathway	BP	1	1	0.0336221	1
GO:0043169	cation binding	MF	3901	312	0.0336694	1
GO:0035326	enhancer binding	MF	92	14	0.0336928	1
GO:0021511	spinal cord patterning	BP	23	6	0.0339061	1
GO:0048333	mesodermal cell differentiation	BP	31	7	0.0341167	1
GO:0021799	cerebral cortex radially oriented cell migration	BP	30	7	0.0341514	1
GO:0060324	face development	BP	45	9	0.0342601	1
GO:0032528	microvillus organization	BP	23	5	0.0343923	1
GO:0008768	UDP-sugar diphosphatase activity	MF	1	1	0.0344866	1
GO:0015629	actin cytoskeleton	CC	430	49	0.0345203	1
GO:0044272	sulfur compound biosynthetic process	BP	205	22	0.0345269	1
GO:0043405	regulation of MAP kinase activity	BP	312	35	0.0345495	1
GO:0032266	phosphatidylinositol-3-phosphate binding	MF	29	6	0.0346175	1
GO:0001932	regulation of protein phosphorylation	BP	1220	111	0.0346358	1
GO:0043409	negative regulation of MAPK cascade	BP	142	18	0.0346726	1
GO:0072012	glomerulus vasculature development	BP	24	6	0.0350321	1
GO:0061572	actin filament bundle organization	BP	128	19	0.0350372	1
GO:0051252	regulation of RNA metabolic process	BP	3471	284	0.0351014	1
GO:0071599	otic vesicle development	BP	15	4	0.0353681	1
GO:0060638	mesenchymal-epithelial cell signaling	BP	8	3	0.0354701	1
GO:0001093	TFIIB-class transcription factor binding	MF	3	2	0.0355242	1
GO:0021785	branchiomotor neuron axon guidance	BP	6	3	0.0355482	1
GO:0045601	regulation of endothelial cell differentiation	BP	30	6	0.0355803	1
GO:0017154	semaphorin receptor activity	MF	9	4	0.0359013	1
GO:0030900	forebrain development	BP	347	45	0.0359072	1
GO:0042426	choline catabolic process	BP	6	2	0.0359981	1
GO:0045444	fat cell differentiation	BP	200	25	0.0360922	1
GO:0005887	integral component of plasma membrane	CC	1451	124	0.0361563	1
GO:0051271	negative regulation of cellular component movement	BP	230	28	0.0364488	1
GO:0060038	cardiac muscle cell proliferation	BP	44	9	0.0367176	1
GO:0004095	carnitine O-palmitoyltransferase activity	MF	4	2	0.0367697	1
GO:0050732	negative regulation of peptidyl-tyrosine phosphorylation	BP	43	8	0.0368074	1
GO:0004672	protein kinase activity	MF	604	65	0.0371384	1
GO:2000251	positive regulation of actin cytoskeleton reorganization	BP	15	4	0.0371584	1
GO:0032365	intracellular lipid transport	BP	29	6	0.0371604	1
GO:0005166	neurotrophin p75 receptor binding	MF	3	2	0.0372258	1
GO:0004871	signal transducer activity	MF	1545	111	0.0373247	1
GO:0048677	axon extension involved in regeneration	BP	3	2	0.0373289	1
GO:0048682	sprouting of injured axon	BP	3	2	0.0373289	1
GO:0048286	lung alveolus development	BP	36	7	0.0373501	1
GO:0007267	cell-cell signaling	BP	1482	146	0.0374055	1
GO:0061209	cell proliferation involved in mesonephros development	BP	3	2	0.0374388	1
GO:0043522	leucine zipper domain binding	MF	11	3	0.0374528	1
GO:0097623	potassium ion export across plasma membrane	BP	7	3	0.0375108	1
GO:0098668	potassium ion export from cell	BP	7	3	0.0375108	1
GO:0016773	phosphotransferase activity, alcohol group as acceptor	MF	735	77	0.0375536	1
GO:0006690	icosanoid metabolic process	BP	98	10	0.0375952	1
GO:1901568	fatty acid derivative metabolic process	BP	98	10	0.0375952	1
GO:0090218	positive regulation of lipid kinase activity	BP	33	7	0.0376218	1
GO:0016202	regulation of striated muscle tissue development	BP	114	17	0.0377827	1
GO:0001843	neural tube closure	BP	83	14	0.0379024	1
GO:0005104	fibroblast growth factor receptor binding	MF	25	5	0.0379597	1
GO:0007368	determination of left/right symmetry	BP	110	15	0.0381201	1
GO:0035907	dorsal aorta development	BP	9	3	0.038218	1
GO:0042060	wound healing	BP	505	51	0.0383533	1
GO:1901385	regulation of voltage-gated calcium channel activity	BP	31	6	0.0384347	1
GO:2000146	negative regulation of cell motility	BP	216	26	0.0386972	1
GO:0035732	nitric oxide storage	BP	1	1	0.0388144	1
GO:0035730	S-nitrosoglutathione binding	MF	1	1	0.0388144	1
GO:0035731	dinitrosyl-iron complex binding	MF	1	1	0.0388144	1
GO:1905642	negative regulation of DNA methylation	BP	1	1	0.0388385	1
GO:1905643	positive regulation of DNA methylation	BP	1	1	0.0388385	1
GO:0016331	morphogenesis of embryonic epithelium	BP	143	21	0.0390711	1
GO:0046661	male sex differentiation	BP	149	18	0.0391712	1
GO:0000032	cell wall mannoprotein biosynthetic process	BP	1	1	0.0391857	1
GO:0006056	mannoprotein metabolic process	BP	1	1	0.0391857	1
GO:0006057	mannoprotein biosynthetic process	BP	1	1	0.0391857	1
GO:0031506	cell wall glycoprotein biosynthetic process	BP	1	1	0.0391857	1
GO:0042546	cell wall biogenesis	BP	1	1	0.0391857	1
GO:0044038	cell wall macromolecule biosynthetic process	BP	1	1	0.0391857	1
GO:0061611	mannose to fructose-6-phosphate metabolic process	BP	1	1	0.0391857	1
GO:0070589	cellular component macromolecule biosynthetic process	BP	1	1	0.0391857	1
GO:0004476	mannose-6-phosphate isomerase activity	MF	1	1	0.0391857	1
GO:0098632	protein binding involved in cell-cell adhesion	MF	30	6	0.0392047	1
GO:0097109	neuroligin family protein binding	MF	5	3	0.0392885	1
GO:0003707	steroid hormone receptor activity	MF	57	10	0.0393022	1
GO:0035282	segmentation	BP	93	14	0.03934	1
GO:0003283	atrial septum development	BP	20	5	0.0393999	1
GO:0060926	cardiac pacemaker cell development	BP	4	2	0.0395296	1
GO:0060606	tube closure	BP	84	14	0.0397315	1
GO:0030144	alpha-1,6-mannosylglycoprotein 6-beta-N-acetylglucosaminyltransferase activity	MF	3	2	0.0397443	1
GO:0060272	embryonic skeletal joint morphogenesis	BP	12	4	0.0397589	1
GO:0045619	regulation of lymphocyte differentiation	BP	135	16	0.0397921	1
GO:0018872	arsonoacetate metabolic process	BP	1	1	0.0398839	1
GO:0030791	arsenite methyltransferase activity	MF	1	1	0.0398839	1
GO:0030792	methylarsonite methyltransferase activity	MF	1	1	0.0398839	1
GO:0009631	cold acclimation	BP	2	1	0.0399219	1
GO:0071300	cellular response to retinoic acid	BP	69	11	0.0399703	1
GO:0043586	tongue development	BP	20	5	0.040209	1
GO:0043067	regulation of programmed cell death	BP	1330	121	0.040216	1
GO:0035867	alphav-beta3 integrin-IGF-1-IGF1R complex	CC	4	2	0.040301	1
GO:0010662	regulation of striated muscle cell apoptotic process	BP	27	6	0.0403724	1
GO:0048593	camera-type eye morphogenesis	BP	102	16	0.0404711	1
GO:0010664	negative regulation of striated muscle cell apoptotic process	BP	20	5	0.0405456	1
GO:0048681	negative regulation of axon regeneration	BP	12	4	0.0405478	1
GO:0005605	basal lamina	CC	20	5	0.0406487	1
GO:0060740	prostate gland epithelium morphogenesis	BP	25	6	0.0411858	1
GO:0008093	cytoskeletal adaptor activity	MF	11	4	0.0412217	1
GO:0072077	renal vesicle morphogenesis	BP	18	5	0.0412825	1
GO:0071664	catenin-TCF7L2 complex	CC	3	2	0.0414445	1
GO:0036042	long-chain fatty acyl-CoA binding	MF	3	2	0.0415097	1
GO:0021569	rhombomere 3 development	BP	3	2	0.0416193	1
GO:0061351	neural precursor cell proliferation	BP	126	18	0.0416568	1
GO:0045137	development of primary sexual characteristics	BP	198	23	0.0417	1
GO:0042105	alpha-beta T cell receptor complex	CC	5	2	0.0421904	1
GO:0000334	3-hydroxyanthranilate 3,4-dioxygenase activity	MF	1	1	0.0422006	1
GO:0003229	ventricular cardiac muscle tissue development	BP	52	9	0.0422297	1
GO:0045182	translation regulator activity	MF	36	7	0.0423691	1
GO:0042636	negative regulation of hair cycle	BP	5	2	0.0423725	1
GO:0072010	glomerular epithelium development	BP	22	5	0.0423893	1
GO:0001518	voltage-gated sodium channel complex	CC	14	3	0.0424083	1
GO:0070372	regulation of ERK1 and ERK2 cascade	BP	238	25	0.042533	1
GO:0010092	specification of animal organ identity	BP	28	7	0.0425646	1
GO:0030275	LRR domain binding	MF	17	4	0.0425686	1
GO:1902442	regulation of ripoptosome assembly involved in necroptotic process	BP	1	1	0.0426696	1
GO:1902443	negative regulation of ripoptosome assembly involved in necroptotic process	BP	1	1	0.0426696	1
GO:0034331	cell junction maintenance	BP	8	3	0.0426924	1
GO:0016150	translation release factor activity, codon nonspecific	MF	1	1	0.042701	1
GO:0009214	cyclic nucleotide catabolic process	BP	22	6	0.0427012	1
GO:1901685	glutathione derivative metabolic process	BP	22	3	0.0428669	1
GO:1901687	glutathione derivative biosynthetic process	BP	22	3	0.0428669	1
GO:0010464	regulation of mesenchymal cell proliferation	BP	35	8	0.0429034	1
GO:0072274	metanephric glomerular basement membrane development	BP	1	1	0.0429063	1
GO:0005886	plasma membrane	CC	4710	362	0.0430139	1
GO:0030325	adrenal gland development	BP	19	5	0.0431156	1
GO:0060090	binding, bridging	MF	173	22	0.0431486	1
GO:0072161	mesenchymal cell differentiation involved in kidney development	BP	7	3	0.0433113	1
GO:2001012	mesenchymal cell differentiation involved in renal system development	BP	7	3	0.0433113	1
GO:0031328	positive regulation of cellular biosynthetic process	BP	1672	155	0.0434152	1
GO:0019389	glucuronoside metabolic process	BP	1	1	0.0435257	1
GO:0019391	glucuronoside catabolic process	BP	1	1	0.0435257	1
GO:0102390	mycophenolic acid acyl-glucuronide esterase activity	MF	1	1	0.0435257	1
GO:0017015	regulation of transforming growth factor beta receptor signaling pathway	BP	96	14	0.0437196	1
GO:0009100	glycoprotein metabolic process	BP	396	38	0.0438267	1
GO:0072243	metanephric nephron epithelium development	BP	23	5	0.0438568	1
GO:1901861	regulation of muscle tissue development	BP	116	17	0.0440339	1
GO:1900062	regulation of replicative cell aging	BP	1	1	0.044119	1
GO:0030098	lymphocyte differentiation	BP	292	30	0.0444754	1
GO:0060693	regulation of branching involved in salivary gland morphogenesis	BP	9	3	0.0446719	1
GO:1904340	positive regulation of dopaminergic neuron differentiation	BP	4	2	0.0446779	1
GO:0048846	axon extension involved in axon guidance	BP	20	6	0.0447069	1
GO:1902284	neuron projection extension involved in neuron projection guidance	BP	20	6	0.0447069	1
GO:0035019	somatic stem cell population maintenance	BP	71	12	0.0447249	1
GO:0021987	cerebral cortex development	BP	104	16	0.0447763	1
GO:0097110	scaffold protein binding	MF	46	9	0.0448201	1
GO:0007565	female pregnancy	BP	167	17	0.0452204	1
GO:0005903	brush border	CC	93	13	0.0452675	1
GO:0003881	CDP-diacylglycerol-inositol 3-phosphatidyltransferase activity	MF	1	1	0.0452976	1
GO:0030842	regulation of intermediate filament depolymerization	BP	1	1	0.0453891	1
GO:0030844	positive regulation of intermediate filament depolymerization	BP	1	1	0.0453891	1
GO:0045106	intermediate filament depolymerization	BP	1	1	0.0453891	1
GO:0045108	regulation of intermediate filament polymerization or depolymerization	BP	1	1	0.0453891	1
GO:0002507	tolerance induction	BP	23	4	0.0455429	1
GO:0002643	regulation of tolerance induction	BP	16	3	0.0456239	1
GO:0004667	prostaglandin-D synthase activity	MF	2	1	0.0456287	1
GO:0033499	galactose catabolic process via UDP-galactose	BP	1	1	0.045798	1
GO:0004034	aldose 1-epimerase activity	MF	1	1	0.045798	1
GO:0010659	cardiac muscle cell apoptotic process	BP	28	6	0.0458093	1
GO:0048320	axial mesoderm formation	BP	3	2	0.0458175	1
GO:0014855	striated muscle cell proliferation	BP	55	10	0.0458577	1
GO:0003677	DNA binding	MF	2290	188	0.0459062	1
GO:0032776	DNA methylation on cytosine	BP	4	2	0.0460714	1
GO:0005089	Rho guanyl-nucleotide exchange factor activity	MF	69	13	0.0461271	1
GO:0090136	epithelial cell-cell adhesion	BP	15	4	0.0462064	1
GO:0007492	endoderm development	BP	76	12	0.0463102	1
GO:0030550	acetylcholine receptor inhibitor activity	MF	4	2	0.046323	1
GO:0060923	cardiac muscle cell fate commitment	BP	8	3	0.0463344	1
GO:0016702	oxidoreductase activity, acting on single donors with incorporation of molecular oxygen, incorporation of two atoms of oxygen	MF	23	4	0.0464478	1
GO:0061004	pattern specification involved in kidney development	BP	9	3	0.0464596	1
GO:0072048	renal system pattern specification	BP	9	3	0.0464596	1
GO:0051153	regulation of striated muscle cell differentiation	BP	89	13	0.0465439	1
GO:1902071	regulation of hypoxia-inducible factor-1alpha signaling pathway	BP	1	1	0.0465758	1
GO:1902073	positive regulation of hypoxia-inducible factor-1alpha signaling pathway	BP	1	1	0.0465758	1
GO:0050918	positive chemotaxis	BP	52	8	0.0466105	1
GO:0050974	detection of mechanical stimulus involved in sensory perception	BP	23	5	0.0468234	1
GO:0072273	metanephric nephron morphogenesis	BP	25	6	0.0469577	1
GO:0043254	regulation of protein complex assembly	BP	360	37	0.046967	1
GO:0061682	seminal vesicle morphogenesis	BP	1	1	0.0469809	1
GO:0010742	macrophage derived foam cell differentiation	BP	34	5	0.0472044	1
GO:0090077	foam cell differentiation	BP	34	5	0.0472044	1
GO:0043402	glucocorticoid mediated signaling pathway	BP	3	2	0.0472068	1
GO:0072217	negative regulation of metanephros development	BP	8	3	0.0472115	1
GO:0032956	regulation of actin cytoskeleton organization	BP	279	32	0.0472307	1
GO:0035635	entry of bacterium into host cell	BP	18	4	0.047235	1
GO:0004043	L-aminoadipate-semialdehyde dehydrogenase activity	MF	1	1	0.0473645	1
GO:0008802	betaine-aldehyde dehydrogenase activity	MF	1	1	0.0473645	1
GO:0061113	pancreas morphogenesis	BP	4	2	0.0475143	1
GO:0003714	transcription corepressor activity	MF	200	25	0.0476455	1
GO:0009891	positive regulation of biosynthetic process	BP	1697	156	0.0477495	1
GO:0034706	sodium channel complex	CC	20	4	0.0477522	1
GO:0060512	prostate gland morphogenesis	BP	27	6	0.0479898	1
GO:0060452	positive regulation of cardiac muscle contraction	BP	10	3	0.0480517	1
GO:0030036	actin cytoskeleton organization	BP	556	60	0.0482912	1
GO:0001581	detection of chemical stimulus involved in sensory perception of sour taste	BP	2	1	0.0483437	1
GO:0033040	sour taste receptor activity	MF	2	1	0.0483437	1
GO:0035116	embryonic hindlimb morphogenesis	BP	27	7	0.0483795	1
GO:0002116	semaphorin receptor complex	CC	6	3	0.0484517	1
GO:1902080	regulation of calcium ion import into sarcoplasmic reticulum	BP	2	1	0.0484768	1
GO:1902081	negative regulation of calcium ion import into sarcoplasmic reticulum	BP	2	1	0.0484768	1
GO:0071031	nuclear mRNA surveillance of mRNA 3'-end processing	BP	2	1	0.0485071	1
GO:0071038	nuclear polyadenylation-dependent tRNA catabolic process	BP	2	1	0.0485071	1
GO:0071049	nuclear retention of pre-mRNA with aberrant 3'-ends at the site of transcription	BP	2	1	0.0485071	1
GO:0048634	regulation of muscle organ development	BP	119	17	0.0485105	1
GO:0050853	B cell receptor signaling pathway	BP	42	7	0.0485733	1
GO:0010832	negative regulation of myotube differentiation	BP	16	4	0.0486503	1
GO:0010941	regulation of cell death	BP	1424	127	0.0486974	1
GO:0032774	RNA biosynthetic process	BP	3601	289	0.0487429	1
GO:0061437	renal system vasculature development	BP	26	6	0.0488002	1
GO:0061440	kidney vasculature development	BP	26	6	0.0488002	1
GO:0048371	lateral mesodermal cell differentiation	BP	3	2	0.0488086	1
GO:0042981	regulation of apoptotic process	BP	1317	119	0.0488376	1
GO:0021537	telencephalon development	BP	228	31	0.0488811	1
GO:0010421	hydrogen peroxide-mediated programmed cell death	BP	11	3	0.0488829	1
GO:0097468	programmed cell death in response to reactive oxygen species	BP	11	3	0.0488829	1
GO:0001715	ectodermal cell fate specification	BP	1	1	0.048908	1
GO:0042665	regulation of ectodermal cell fate specification	BP	1	1	0.048908	1
GO:0042666	negative regulation of ectodermal cell fate specification	BP	1	1	0.048908	1
GO:2000383	regulation of ectoderm development	BP	1	1	0.048908	1
GO:2000384	negative regulation of ectoderm development	BP	1	1	0.048908	1
GO:0030371	translation repressor activity	MF	23	5	0.0489119	1
GO:0070571	negative regulation of neuron projection regeneration	BP	13	4	0.0489992	1
GO:0045669	positive regulation of osteoblast differentiation	BP	55	9	0.049092	1
GO:0030879	mammary gland development	BP	127	18	0.0492716	1
GO:0071229	cellular response to acid chemical	BP	189	23	0.0493221	1
GO:0086048	membrane depolarization during bundle of His cell action potential	BP	3	2	0.0493374	1
GO:0006043	glucosamine catabolic process	BP	1	1	0.0494556	1
GO:0021543	pallium development	BP	157	22	0.0495466	1
GO:1904179	positive regulation of adipose tissue development	BP	4	2	0.0496222	1
GO:0086006	voltage-gated sodium channel activity involved in cardiac muscle cell action potential	MF	5	2	0.0496732	1
GO:0000988	transcription factor activity, protein binding	MF	562	58	0.0496753	1
GO:0002521	leukocyte differentiation	BP	434	42	0.0497008	1
GO:0016701	oxidoreductase activity, acting on single donors with incorporation of molecular oxygen	MF	24	4	0.0501049	1
GO:0010656	negative regulation of muscle cell apoptotic process	BP	30	6	0.0503994	1
GO:0043295	glutathione binding	MF	11	2	0.0504446	1
GO:0006564	L-serine biosynthetic process	BP	6	2	0.0504985	1
GO:0019546	arginine deiminase pathway	BP	1	1	0.0506161	1
GO:0016990	arginine deiminase activity	MF	1	1	0.0506161	1
GO:0071603	endothelial cell-cell adhesion	BP	4	2	0.0506235	1
GO:0072050	S-shaped body morphogenesis	BP	8	3	0.0507569	1
GO:0048793	pronephros development	BP	8	3	0.0509227	1
GO:1902809	regulation of skeletal muscle fiber differentiation	BP	3	2	0.0510185	1
GO:0008466	glycogenin glucosyltransferase activity	MF	1	1	0.0510726	1
GO:0008650	rRNA (uridine-2'-O-)-methyltransferase activity	MF	1	1	0.0510884	1
GO:0016436	rRNA (uridine) methyltransferase activity	MF	1	1	0.0510884	1
GO:0032787	monocarboxylic acid metabolic process	BP	530	46	0.0511682	1
GO:0045218	zonula adherens maintenance	BP	3	2	0.0513441	1
GO:0035844	cloaca development	BP	4	2	0.0515307	1
GO:0001750	photoreceptor outer segment	CC	70	9	0.051571	1
GO:0060920	cardiac pacemaker cell differentiation	BP	5	2	0.0515835	1
GO:2001300	lipoxin metabolic process	BP	6	2	0.0517007	1
GO:0042325	regulation of phosphorylation	BP	1305	117	0.0517105	1
GO:0060350	endochondral bone morphogenesis	BP	48	9	0.0518168	1
GO:0046912	transferase activity, transferring acyl groups, acyl groups converted into alkyl on transfer	MF	5	2	0.0518861	1
GO:0070410	co-SMAD binding	MF	8	3	0.0519387	1
GO:0055010	ventricular cardiac muscle tissue morphogenesis	BP	47	8	0.0519656	1
GO:0035970	peptidyl-threonine dephosphorylation	BP	11	3	0.0519699	1
GO:0032970	regulation of actin filament-based process	BP	317	36	0.0522676	1
GO:0047150	betaine-homocysteine S-methyltransferase activity	MF	1	1	0.0523642	1
GO:0021910	smoothened signaling pathway involved in ventral spinal cord patterning	BP	7	3	0.0523813	1
GO:0030332	cyclin binding	MF	24	5	0.0525557	1
GO:0009913	epidermal cell differentiation	BP	321	21	0.0526108	1
GO:0043550	regulation of lipid kinase activity	BP	49	9	0.0526421	1
GO:0045778	positive regulation of ossification	BP	79	12	0.052754	1
GO:0000165	MAPK cascade	BP	822	76	0.0529434	1
GO:1901343	negative regulation of vasculature development	BP	79	11	0.053087	1
GO:1901889	negative regulation of cell junction assembly	BP	19	5	0.0534878	1
GO:0010718	positive regulation of epithelial to mesenchymal transition	BP	39	7	0.0535745	1
GO:1900750	oligopeptide binding	MF	12	2	0.0535749	1
GO:0005884	actin filament	CC	77	12	0.0536503	1
GO:0061047	positive regulation of branching involved in lung morphogenesis	BP	4	2	0.0537447	1
GO:0061436	establishment of skin barrier	BP	20	4	0.0538043	1
GO:1902001	fatty acid transmembrane transport	BP	15	4	0.0539448	1
GO:0002088	lens development in camera-type eye	BP	64	10	0.0540147	1
GO:0031345	negative regulation of cell projection organization	BP	135	19	0.0540818	1
GO:2000016	negative regulation of determination of dorsal identity	BP	1	1	0.0541229	1
GO:0045844	positive regulation of striated muscle tissue development	BP	62	11	0.0543116	1
GO:0048636	positive regulation of muscle organ development	BP	62	11	0.0543116	1
GO:0016416	O-palmitoyltransferase activity	MF	5	2	0.0543514	1
GO:0014020	primary neural tube formation	BP	89	14	0.0544087	1
GO:2001044	regulation of integrin-mediated signaling pathway	BP	10	3	0.0544823	1
GO:0061768	magnesium:sodium antiporter activity	MF	1	1	0.054497	1
GO:0018916	nitrobenzene metabolic process	BP	3	1	0.0545265	1
GO:0070458	cellular detoxification of nitrogen compound	BP	3	1	0.0545265	1
GO:0044706	multi-multicellular organism process	BP	194	19	0.0545513	1
GO:0070739	protein-glutamic acid ligase activity	MF	6	2	0.0545711	1
GO:0072239	metanephric glomerulus vasculature development	BP	8	3	0.0548582	1
GO:0008406	gonad development	BP	194	22	0.0550768	1
GO:2001023	regulation of response to drug	BP	6	2	0.0551698	1
GO:0021795	cerebral cortex cell migration	BP	40	8	0.0552275	1
GO:0035269	protein O-linked mannosylation	BP	14	3	0.0554141	1
GO:0019534	toxin transporter activity	MF	5	2	0.0554176	1
GO:0004300	enoyl-CoA hydratase activity	MF	8	2	0.0557021	1
GO:0016901	oxidoreductase activity, acting on the CH-OH group of donors, quinone or similar compound as acceptor	MF	5	2	0.0557666	1
GO:0004492	methylmalonyl-CoA decarboxylase activity	MF	1	1	0.0558115	1
GO:0042692	muscle cell differentiation	BP	353	41	0.0558958	1
GO:0005915	zonula adherens	CC	8	3	0.0559457	1
GO:0021675	nerve development	BP	72	12	0.0559921	1
GO:0097116	gephyrin clustering involved in postsynaptic density assembly	BP	3	2	0.0562862	1
GO:0051147	regulation of muscle cell differentiation	BP	159	20	0.0563599	1
GO:1900747	negative regulation of vascular endothelial growth factor signaling pathway	BP	5	2	0.0565444	1
GO:1900274	regulation of phospholipase C activity	BP	37	6	0.0566295	1
GO:2000194	regulation of female gonad development	BP	11	3	0.0566511	1
GO:0015014	heparan sulfate proteoglycan biosynthetic process, polysaccharide chain biosynthetic process	BP	3	2	0.0567358	1
GO:0014807	regulation of somitogenesis	BP	9	3	0.0567579	1
GO:0006486	protein glycosylation	BP	265	25	0.0568102	1
GO:0043413	macromolecule glycosylation	BP	265	25	0.0568102	1
GO:0010159	specification of animal organ position	BP	3	2	0.0570489	1
GO:0033293	monocarboxylic acid binding	MF	56	8	0.0571748	1
GO:0016641	oxidoreductase activity, acting on the CH-NH2 group of donors, oxygen as acceptor	MF	13	3	0.0572282	1
GO:0033344	cholesterol efflux	BP	40	6	0.0573438	1
GO:0005024	transforming growth factor beta-activated receptor activity	MF	9	3	0.0573936	1
GO:2000036	regulation of stem cell population maintenance	BP	22	5	0.0574624	1
GO:0015015	heparan sulfate proteoglycan biosynthetic process, enzymatic modification	BP	4	2	0.0575031	1
GO:0097730	non-motile cilium	CC	117	13	0.05762	1
GO:0001091	RNA polymerase II basal transcription factor binding	MF	11	3	0.0577123	1
GO:0031324	negative regulation of cellular metabolic process	BP	2245	191	0.0577309	1
GO:1901863	positive regulation of muscle tissue development	BP	63	11	0.0577407	1
GO:0008172	S-methyltransferase activity	MF	6	2	0.0578635	1
GO:0042221	response to chemical	BP	3850	286	0.0579007	1
GO:0016580	Sin3 complex	CC	13	3	0.0579012	1
GO:0045740	positive regulation of DNA replication	BP	54	8	0.058141	1
GO:0051101	regulation of DNA binding	BP	106	14	0.0581441	1
GO:0033135	regulation of peptidyl-serine phosphorylation	BP	107	14	0.0582343	1
GO:0002669	positive regulation of T cell anergy	BP	2	1	0.0582636	1
GO:0002913	positive regulation of lymphocyte anergy	BP	2	1	0.0582636	1
GO:0010756	positive regulation of plasminogen activation	BP	6	2	0.0583591	1
GO:0070831	basement membrane assembly	BP	9	3	0.0584822	1
GO:0014843	growth factor dependent regulation of skeletal muscle satellite cell proliferation	BP	1	1	0.0584951	1
GO:0045720	negative regulation of integrin biosynthetic process	BP	1	1	0.0586569	1
GO:1901722	regulation of cell proliferation involved in kidney development	BP	13	4	0.0586801	1
GO:0042473	outer ear morphogenesis	BP	9	3	0.0588078	1
GO:0004617	phosphoglycerate dehydrogenase activity	MF	1	1	0.0588324	1
GO:0048534	hematopoietic or lymphoid organ development	BP	721	68	0.0588782	1
GO:0042056	chemoattractant activity	MF	26	4	0.0589041	1
GO:0001819	positive regulation of cytokine production	BP	374	32	0.0589642	1
GO:0014011	Schwann cell proliferation involved in axon regeneration	BP	1	1	0.0591328	1
GO:1900148	negative regulation of Schwann cell migration	BP	1	1	0.0591328	1
GO:1905044	regulation of Schwann cell proliferation involved in axon regeneration	BP	1	1	0.0591328	1
GO:1905045	negative regulation of Schwann cell proliferation involved in axon regeneration	BP	1	1	0.0591328	1
GO:0001838	embryonic epithelial tube formation	BP	118	17	0.0591831	1
GO:0007634	optokinetic behavior	BP	1	1	0.0591973	1
GO:0045620	negative regulation of lymphocyte differentiation	BP	39	6	0.059206	1
GO:0072750	cellular response to leptomycin B	BP	1	1	0.0592504	1
GO:1901344	response to leptomycin B	BP	1	1	0.0592504	1
GO:1901707	leptomycin B binding	MF	1	1	0.0592504	1
GO:0051129	negative regulation of cellular component organization	BP	562	57	0.0597185	1
GO:0051582	positive regulation of neurotransmitter uptake	BP	4	2	0.0599493	1
GO:0086080	protein binding involved in heterotypic cell-cell adhesion	MF	11	3	0.060038	1
GO:0035989	tendon development	BP	4	2	0.0600824	1
GO:0005912	adherens junction	CC	473	53	0.0601599	1
GO:0007405	neuroblast proliferation	BP	52	9	0.0602965	1
GO:0007420	brain development	BP	639	72	0.0604523	1
GO:0060592	mammary gland formation	BP	7	3	0.0605192	1
GO:0051393	alpha-actinin binding	MF	32	6	0.0605403	1
GO:0086011	membrane repolarization during action potential	BP	22	5	0.0606406	1
GO:0009404	toxin metabolic process	BP	12	3	0.060707	1
GO:0033625	positive regulation of integrin activation	BP	5	2	0.0608812	1
GO:0004909	interleukin-1, Type I, activating receptor activity	MF	2	1	0.0609839	1
GO:0003252	negative regulation of cell proliferation involved in heart valve morphogenesis	BP	1	1	0.0610423	1
GO:0060433	bronchus development	BP	11	3	0.061054	1
GO:0036312	phosphatidylinositol 3-kinase regulatory subunit binding	MF	10	3	0.0611163	1
GO:0070161	anchoring junction	CC	489	54	0.0612153	1
GO:0016409	palmitoyltransferase activity	MF	35	5	0.0612207	1
GO:0060322	head development	BP	671	75	0.0613367	1
GO:1902523	positive regulation of protein K63-linked ubiquitination	BP	2	1	0.0613505	1
GO:2001237	negative regulation of extrinsic apoptotic signaling pathway	BP	99	13	0.061748	1
GO:0021904	dorsal/ventral neural tube patterning	BP	24	5	0.0618178	1
GO:0035924	cellular response to vascular endothelial growth factor stimulus	BP	38	7	0.0618827	1
GO:0018057	peptidyl-lysine oxidation	BP	1	1	0.0619624	1
GO:1905590	fibronectin fibril organization	BP	1	1	0.0619624	1
GO:0047800	cysteamine dioxygenase activity	MF	1	1	0.0620204	1
GO:0072189	ureter development	BP	13	4	0.0621095	1
GO:0002830	positive regulation of type 2 immune response	BP	14	3	0.0621098	1
GO:0000229	cytoplasmic chromosome	CC	2	1	0.0622058	1
GO:1905330	regulation of morphogenesis of an epithelium	BP	171	22	0.0625657	1
GO:0010658	striated muscle cell apoptotic process	BP	30	6	0.0626679	1
GO:0045664	regulation of neuron differentiation	BP	521	63	0.0627786	1
GO:0060687	regulation of branching involved in prostate gland morphogenesis	BP	7	3	0.0628154	1
GO:0016803	ether hydrolase activity	MF	8	2	0.0628585	1
GO:0040013	negative regulation of locomotion	BP	243	28	0.0629193	1
GO:2000678	negative regulation of transcription regulatory region DNA binding	BP	18	4	0.0629585	1
GO:0034668	integrin alpha4-beta1 complex	CC	1	1	0.0630708	1
GO:0098637	protein complex involved in cell-matrix adhesion	CC	1	1	0.0630708	1
GO:1990971	EMILIN complex	CC	1	1	0.0630708	1
GO:0008298	intracellular mRNA localization	BP	12	3	0.063377	1
GO:1904177	regulation of adipose tissue development	BP	5	2	0.0634933	1
GO:0021604	cranial nerve structural organization	BP	9	3	0.0636124	1
GO:0048319	axial mesoderm morphogenesis	BP	4	2	0.0639851	1
GO:0030674	protein binding, bridging	MF	156	19	0.0643369	1
GO:0003708	retinoic acid receptor activity	MF	7	3	0.0643675	1
GO:0006468	protein phosphorylation	BP	1745	153	0.064462	1
GO:0043552	positive regulation of phosphatidylinositol 3-kinase activity	BP	30	6	0.0646194	1
GO:0022407	regulation of cell-cell adhesion	BP	376	36	0.0646604	1
GO:0050885	neuromuscular process controlling balance	BP	52	9	0.0648615	1
GO:2000195	negative regulation of female gonad development	BP	4	2	0.0650957	1
GO:0001754	eye photoreceptor cell differentiation	BP	41	6	0.0651033	1
GO:0038026	reelin-mediated signaling pathway	BP	4	2	0.0654018	1
GO:0060491	regulation of cell projection assembly	BP	139	18	0.0654742	1
GO:0042693	muscle cell fate commitment	BP	17	4	0.065562	1
GO:0016406	carnitine O-acyltransferase activity	MF	6	2	0.065711	1
GO:0021561	facial nerve development	BP	9	3	0.0659214	1
GO:0021610	facial nerve morphogenesis	BP	9	3	0.0659214	1
GO:0019317	fucose catabolic process	BP	9	2	0.0660369	1
GO:0042354	L-fucose metabolic process	BP	9	2	0.0660369	1
GO:0042355	L-fucose catabolic process	BP	9	2	0.0660369	1
GO:0007418	ventral midline development	BP	4	2	0.0660513	1
GO:0021938	smoothened signaling pathway involved in regulation of cerebellar granule cell precursor cell proliferation	BP	4	2	0.0660513	1
GO:0032232	negative regulation of actin filament bundle assembly	BP	21	5	0.0660796	1
GO:0003143	embryonic heart tube morphogenesis	BP	63	10	0.0661792	1
GO:0090219	negative regulation of lipid kinase activity	BP	4	2	0.0661843	1
GO:0086001	cardiac muscle cell action potential	BP	61	10	0.0662365	1
GO:0016861	intramolecular oxidoreductase activity, interconverting aldoses and ketoses	MF	8	2	0.0663623	1
GO:0030336	negative regulation of cell migration	BP	204	24	0.0663971	1
GO:2001236	regulation of extrinsic apoptotic signaling pathway	BP	150	18	0.0665808	1
GO:0070016	armadillo repeat domain binding	MF	10	3	0.0666207	1
GO:0051041	positive regulation of calcium-independent cell-cell adhesion	BP	1	1	0.0666947	1
GO:0031737	CX3C chemokine receptor binding	MF	1	1	0.0666947	1
GO:0072091	regulation of stem cell proliferation	BP	59	9	0.0668936	1
GO:0007371	ventral midline determination	BP	1	1	0.0669633	1
GO:0060245	detection of cell density	BP	1	1	0.0669633	1
GO:0060246	detection of cell density by contact stimulus	BP	1	1	0.0669633	1
GO:0060248	detection of cell density by contact stimulus involved in contact inhibition	BP	1	1	0.0669633	1
GO:0072036	mesenchymal to epithelial transition involved in renal vesicle formation	BP	1	1	0.0669633	1
GO:0072285	mesenchymal to epithelial transition involved in metanephric renal vesicle formation	BP	1	1	0.0669633	1
GO:0004118	cGMP-stimulated cyclic-nucleotide phosphodiesterase activity	MF	3	2	0.0670012	1
GO:0001764	neuron migration	BP	127	19	0.0670524	1
GO:0036035	osteoclast development	BP	16	4	0.0672172	1
GO:0032836	glomerular basement membrane development	BP	10	3	0.0672281	1
GO:1903727	positive regulation of phospholipid metabolic process	BP	41	7	0.0672609	1
GO:0042670	retinal cone cell differentiation	BP	9	2	0.0672704	1
GO:0046549	retinal cone cell development	BP	9	2	0.0672704	1
GO:1905114	cell surface receptor signaling pathway involved in cell-cell signaling	BP	549	61	0.0673191	1
GO:0097305	response to alcohol	BP	183	20	0.0673485	1
GO:0072137	condensed mesenchymal cell proliferation	BP	4	2	0.0675257	1
GO:0061038	uterus morphogenesis	BP	6	2	0.0677519	1
GO:0070207	protein homotrimerization	BP	25	4	0.0677582	1
GO:0003166	bundle of His development	BP	4	2	0.0678353	1
GO:0015271	outward rectifier potassium channel activity	MF	11	3	0.0680853	1
GO:0072125	negative regulation of glomerular mesangial cell proliferation	BP	4	2	0.0683281	1
GO:0090194	negative regulation of glomerulus development	BP	4	2	0.0683281	1
GO:0031490	chromatin DNA binding	MF	83	11	0.0684559	1
GO:0044324	regulation of transcription involved in anterior/posterior axis specification	BP	2	1	0.0685074	1
GO:0006275	regulation of DNA replication	BP	110	13	0.0685412	1
GO:0097191	extrinsic apoptotic signaling pathway	BP	206	23	0.0685791	1
GO:0032373	positive regulation of sterol transport	BP	19	4	0.0689782	1
GO:0032376	positive regulation of cholesterol transport	BP	19	4	0.0689782	1
GO:1901203	positive regulation of extracellular matrix assembly	BP	9	3	0.0690583	1
GO:0046488	phosphatidylinositol metabolic process	BP	207	22	0.0691018	1
GO:1901299	negative regulation of hydrogen peroxide-mediated programmed cell death	BP	6	2	0.0692978	1
GO:0050795	regulation of behavior	BP	63	8	0.0693945	1
GO:0060041	retina development in camera-type eye	BP	136	18	0.0695766	1
GO:0050863	regulation of T cell activation	BP	287	26	0.0696489	1
GO:0072124	regulation of glomerular mesangial cell proliferation	BP	9	3	0.0696735	1
GO:0000989	transcription factor activity, transcription factor binding	MF	553	56	0.0698211	1
GO:0005577	fibrinogen complex	CC	9	2	0.0699549	1
GO:0045785	positive regulation of cell adhesion	BP	367	37	0.0700376	1
GO:0006195	purine nucleotide catabolic process	BP	44	7	0.0700835	1
GO:0002510	central B cell tolerance induction	BP	1	1	0.0702575	1
GO:0002646	regulation of central tolerance induction	BP	1	1	0.0702575	1
GO:0002648	positive regulation of central tolerance induction	BP	1	1	0.0702575	1
GO:0002895	regulation of central B cell tolerance induction	BP	1	1	0.0702575	1
GO:0002897	positive regulation of central B cell tolerance induction	BP	1	1	0.0702575	1
GO:0072016	glomerular parietal epithelial cell development	BP	1	1	0.0702575	1
GO:1901248	positive regulation of lung ciliated cell differentiation	BP	1	1	0.0702575	1
GO:0040008	regulation of growth	BP	585	60	0.0703214	1
GO:0000978	RNA polymerase II core promoter proximal region sequence-specific DNA binding	MF	322	37	0.0703995	1
GO:0043069	negative regulation of programmed cell death	BP	778	72	0.0704135	1
GO:0050431	transforming growth factor beta binding	MF	17	4	0.0704479	1
GO:0043548	phosphatidylinositol 3-kinase binding	MF	31	6	0.0705107	1
GO:0014068	positive regulation of phosphatidylinositol 3-kinase signaling	BP	64	9	0.0705824	1
GO:0060394	negative regulation of pathway-restricted SMAD protein phosphorylation	BP	10	3	0.0706571	1
GO:0017017	MAP kinase tyrosine/serine/threonine phosphatase activity	MF	11	3	0.0708257	1
GO:0090324	negative regulation of oxidative phosphorylation	BP	5	2	0.0709241	1
GO:0002664	regulation of T cell tolerance induction	BP	10	2	0.0709261	1
GO:0007043	cell-cell junction assembly	BP	90	12	0.0709306	1
GO:1902105	regulation of leukocyte differentiation	BP	229	24	0.0710875	1
GO:0006631	fatty acid metabolic process	BP	325	28	0.0710892	1
GO:0021775	smoothened signaling pathway involved in ventral spinal cord interneuron specification	BP	3	2	0.0711132	1
GO:0021776	smoothened signaling pathway involved in spinal cord motor neuron cell fate specification	BP	3	2	0.0711132	1
GO:0006359	regulation of transcription from RNA polymerase III promoter	BP	26	5	0.0711533	1
GO:1901899	positive regulation of relaxation of cardiac muscle	BP	2	1	0.0712318	1
GO:0009581	detection of external stimulus	BP	122	14	0.0714002	1
GO:0043584	nose development	BP	15	4	0.0714352	1
GO:0097490	sympathetic neuron projection extension	BP	4	2	0.0715395	1
GO:0097491	sympathetic neuron projection guidance	BP	4	2	0.0715395	1
GO:0030175	filopodium	CC	91	13	0.0715978	1
GO:0032355	response to estradiol	BP	125	15	0.0717128	1
GO:0000177	cytoplasmic exosome (RNase complex)	CC	10	2	0.0717894	1
GO:0043184	vascular endothelial growth factor receptor 2 binding	MF	7	2	0.0718484	1
GO:0048369	lateral mesoderm morphogenesis	BP	4	2	0.0719931	1
GO:0048370	lateral mesoderm formation	BP	4	2	0.0719931	1
GO:0034769	basement membrane disassembly	BP	2	1	0.0720628	1
GO:0032391	photoreceptor connecting cilium	CC	33	5	0.0720765	1
GO:0035082	axoneme assembly	BP	52	7	0.0720832	1
GO:0008584	male gonad development	BP	127	15	0.0720927	1
GO:0046546	development of primary male sexual characteristics	BP	127	15	0.0720927	1
GO:0070723	response to cholesterol	BP	21	4	0.0721733	1
GO:0001947	heart looping	BP	57	9	0.0723888	1
GO:0042490	mechanoreceptor differentiation	BP	57	9	0.0723948	1
GO:0086103	G-protein coupled receptor signaling pathway involved in heart process	BP	9	3	0.072438	1
GO:0031460	glycine betaine transport	BP	1	1	0.0724891	1
GO:0060411	cardiac septum morphogenesis	BP	63	11	0.0725431	1
GO:0070085	glycosylation	BP	273	25	0.0726162	1
GO:0033561	regulation of water loss via skin	BP	22	4	0.0727036	1
GO:0006941	striated muscle contraction	BP	158	19	0.0727131	1
GO:0072224	metanephric glomerulus development	BP	15	4	0.0727163	1
GO:0001817	regulation of cytokine production	BP	555	46	0.0728384	1
GO:0001816	cytokine production	BP	613	50	0.072949	1
GO:0016054	organic acid catabolic process	BP	225	21	0.0732251	1
GO:0046395	carboxylic acid catabolic process	BP	225	21	0.0732251	1
GO:0072278	metanephric comma-shaped body morphogenesis	BP	4	2	0.0737117	1
GO:0003712	transcription cofactor activity	MF	491	50	0.0737181	1
GO:0010171	body morphogenesis	BP	44	8	0.0738757	1
GO:0001011	transcription factor activity, sequence-specific DNA binding, RNA polymerase recruiting	MF	1	1	0.073926	1
GO:0001087	transcription factor activity, TFIIB-class binding	MF	1	1	0.073926	1
GO:0030097	hemopoiesis	BP	681	63	0.0739827	1
GO:0070371	ERK1 and ERK2 cascade	BP	254	25	0.0739922	1
GO:0004053	arginase activity	MF	2	1	0.073997	1
GO:0032754	positive regulation of interleukin-5 production	BP	10	3	0.0743611	1
GO:0060420	regulation of heart growth	BP	50	9	0.0743801	1
GO:1902524	positive regulation of protein K48-linked ubiquitination	BP	2	1	0.0744054	1
GO:0035898	parathyroid hormone secretion	BP	3	2	0.0745654	1
GO:0001302	replicative cell aging	BP	6	2	0.0747541	1
GO:0003705	transcription factor activity, RNA polymerase II distal enhancer sequence-specific binding	MF	89	12	0.0747646	1
GO:0021636	trigeminal nerve morphogenesis	BP	4	2	0.0750187	1
GO:0021637	trigeminal nerve structural organization	BP	4	2	0.0750187	1
GO:1902287	semaphorin-plexin signaling pathway involved in axon guidance	BP	4	2	0.0750187	1
GO:0009154	purine ribonucleotide catabolic process	BP	31	6	0.075021	1
GO:0006577	amino-acid betaine metabolic process	BP	16	3	0.0750462	1
GO:0035148	tube formation	BP	139	19	0.0751869	1
GO:0034165	positive regulation of toll-like receptor 9 signaling pathway	BP	2	1	0.0754011	1
GO:0098862	cluster of actin-based cell projections	CC	132	16	0.0756206	1
GO:0010604	positive regulation of macromolecule metabolic process	BP	2734	234	0.0757661	1
GO:0061343	cell adhesion involved in heart morphogenesis	BP	4	2	0.0760097	1
GO:1903025	regulation of RNA polymerase II regulatory region sequence-specific DNA binding	BP	8	2	0.0760955	1
GO:0097371	MDM2/MDM4 family protein binding	MF	6	2	0.0762123	1
GO:0046620	regulation of organ growth	BP	78	12	0.0762563	1
GO:2000329	negative regulation of T-helper 17 cell lineage commitment	BP	2	1	0.0763811	1
GO:0043534	blood vessel endothelial cell migration	BP	72	11	0.0764303	1
GO:0061325	cell proliferation involved in outflow tract morphogenesis	BP	4	2	0.0766529	1
GO:0031228	intrinsic component of Golgi membrane	CC	57	8	0.0766802	1
GO:0045820	negative regulation of glycolytic process	BP	12	3	0.0767219	1
GO:0051195	negative regulation of cofactor metabolic process	BP	12	3	0.0767219	1
GO:0051198	negative regulation of coenzyme metabolic process	BP	12	3	0.0767219	1
GO:0033010	paranodal junction	CC	5	2	0.0767615	1
GO:0035767	endothelial cell chemotaxis	BP	24	5	0.0768057	1
GO:0044420	extracellular matrix component	CC	113	16	0.0770327	1
GO:0021564	vagus nerve development	BP	3	2	0.0771802	1
GO:0038031	non-canonical Wnt signaling pathway via JNK cascade	BP	6	2	0.0771835	1
GO:1903579	negative regulation of ATP metabolic process	BP	20	4	0.0775855	1
GO:0005171	hepatocyte growth factor receptor binding	MF	2	1	0.0776032	1
GO:0086073	bundle of His cell-Purkinje myocyte adhesion involved in cell communication	BP	6	2	0.0776722	1
GO:0086083	cell adhesive protein binding involved in bundle of His cell-Purkinje myocyte communication	MF	6	2	0.0776722	1
GO:0035591	signaling adaptor activity	MF	73	11	0.0779203	1
GO:0043997	histone acetyltransferase activity (H4-K12 specific)	MF	1	1	0.0780675	1
GO:0003164	His-Purkinje system development	BP	5	2	0.0785791	1
GO:0009299	mRNA transcription	BP	22	4	0.0787072	1
GO:0048546	digestive tract morphogenesis	BP	49	9	0.07914	1
GO:1903524	positive regulation of blood circulation	BP	61	8	0.0791593	1
GO:1903037	regulation of leukocyte cell-cell adhesion	BP	302	27	0.0793451	1
GO:0060453	regulation of gastric acid secretion	BP	10	3	0.0793872	1
GO:0032029	myosin tail binding	MF	1	1	0.0793966	1
GO:0005010	insulin-like growth factor-activated receptor activity	MF	3	2	0.0795354	1
GO:0035869	ciliary transition zone	CC	56	7	0.0795773	1
GO:2001026	regulation of endothelial cell chemotaxis	BP	17	4	0.0795923	1
GO:0045872	positive regulation of rhodopsin gene expression	BP	2	1	0.0796507	1
GO:0030857	negative regulation of epithelial cell differentiation	BP	36	6	0.079691	1
GO:0000902	cell morphogenesis	BP	856	95	0.0800551	1
GO:0035909	aorta morphogenesis	BP	29	6	0.0800709	1
GO:0038132	neuregulin binding	MF	5	2	0.0800733	1
GO:0016301	kinase activity	MF	797	79	0.0801536	1
GO:0022617	extracellular matrix disassembly	BP	87	11	0.0802319	1
GO:0010596	negative regulation of endothelial cell migration	BP	38	6	0.0803812	1
GO:0045879	negative regulation of smoothened signaling pathway	BP	24	5	0.0804193	1
GO:0060872	semicircular canal development	BP	9	3	0.0805243	1
GO:0046983	protein dimerization activity	MF	1131	96	0.0805293	1
GO:0009582	detection of abiotic stimulus	BP	125	14	0.080571	1
GO:0002635	negative regulation of germinal center formation	BP	2	1	0.0805879	1
GO:0042110	T cell activation	BP	418	37	0.0806798	1
GO:0046622	positive regulation of organ growth	BP	43	8	0.0807009	1
GO:0045121	membrane raft	CC	274	30	0.0808641	1
GO:0098857	membrane microdomain	CC	274	30	0.0808641	1
GO:0061143	alveolar primary septum development	BP	1	1	0.0809916	1
GO:0031325	positive regulation of cellular metabolic process	BP	2751	235	0.081021	1
GO:0035483	gastric emptying	BP	2	1	0.0811179	1
GO:0048384	retinoic acid receptor signaling pathway	BP	30	6	0.0812259	1
GO:0005070	SH3/SH2 adaptor activity	MF	51	8	0.0812508	1
GO:0031333	negative regulation of protein complex assembly	BP	114	14	0.0813082	1
GO:0048589	developmental growth	BP	535	59	0.0816402	1
GO:0090079	translation regulator activity, nucleic acid binding	MF	19	4	0.0817631	1
GO:0005496	steroid binding	MF	88	10	0.0819095	1
GO:0001841	neural tube formation	BP	98	14	0.0819556	1
GO:0021513	spinal cord dorsal/ventral patterning	BP	21	5	0.0820684	1
GO:0055021	regulation of cardiac muscle tissue growth	BP	45	8	0.0821434	1
GO:0032352	positive regulation of hormone metabolic process	BP	11	3	0.0822225	1
GO:0010977	negative regulation of neuron projection development	BP	112	16	0.0823577	1
GO:0010743	regulation of macrophage derived foam cell differentiation	BP	29	4	0.0824814	1
GO:0021919	BMP signaling pathway involved in spinal cord dorsal/ventral patterning	BP	1	1	0.0826425	1
GO:1900746	regulation of vascular endothelial growth factor signaling pathway	BP	11	3	0.0827503	1
GO:1902548	negative regulation of cellular response to vascular endothelial growth factor stimulus	BP	6	2	0.0828726	1
GO:0019805	quinolinate biosynthetic process	BP	3	1	0.0831237	1
GO:0004879	RNA polymerase II transcription factor activity, ligand-activated sequence-specific DNA binding	MF	46	8	0.0833648	1
GO:0098531	transcription factor activity, direct ligand regulated sequence-specific DNA binding	MF	46	8	0.0833648	1
GO:1903053	regulation of extracellular matrix organization	BP	29	6	0.0833764	1
GO:0051683	establishment of Golgi localization	BP	7	2	0.0835254	1
GO:0060440	trachea formation	BP	6	2	0.0835673	1
GO:0003209	cardiac atrium morphogenesis	BP	31	6	0.0838465	1
GO:0001955	blood vessel maturation	BP	8	2	0.0840605	1
GO:0000987	core promoter proximal region sequence-specific DNA binding	MF	334	38	0.0841125	1
GO:0072110	glomerular mesangial cell proliferation	BP	10	3	0.0841303	1
GO:2000551	regulation of T-helper 2 cell cytokine production	BP	6	2	0.0843067	1
GO:2000553	positive regulation of T-helper 2 cell cytokine production	BP	6	2	0.0843067	1
GO:0017002	activin-activated receptor activity	MF	7	2	0.0843808	1
GO:0032872	regulation of stress-activated MAPK cascade	BP	194	22	0.0844906	1
GO:0009261	ribonucleotide catabolic process	BP	32	6	0.0845006	1
GO:0007512	adult heart development	BP	12	3	0.0845355	1
GO:0007265	Ras protein signal transduction	BP	302	34	0.0846108	1
GO:0051580	regulation of neurotransmitter uptake	BP	12	3	0.0848193	1
GO:0060445	branching involved in salivary gland morphogenesis	BP	23	5	0.0850578	1
GO:0019369	arachidonic acid metabolic process	BP	49	5	0.0852865	1
GO:0004342	glucosamine-6-phosphate deaminase activity	MF	2	1	0.0853709	1
GO:0034379	very-low-density lipoprotein particle assembly	BP	8	2	0.0855206	1
GO:0019695	choline metabolic process	BP	9	2	0.0855705	1
GO:0086012	membrane depolarization during cardiac muscle cell action potential	BP	22	5	0.0857327	1
GO:0002513	tolerance induction to self antigen	BP	4	2	0.0857346	1
GO:0044291	cell-cell contact zone	CC	61	9	0.0858206	1
GO:0002542	Factor XII activation	BP	2	1	0.085914	1
GO:0090190	positive regulation of branching involved in ureteric bud morphogenesis	BP	17	4	0.0860264	1
GO:0072175	epithelial tube formation	BP	126	17	0.0861537	1
GO:0070742	C2H2 zinc finger domain binding	MF	13	4	0.0861739	1
GO:0016615	malate dehydrogenase activity	MF	8	2	0.0862244	1
GO:0038171	cannabinoid signaling pathway	BP	6	2	0.0863359	1
GO:0086002	cardiac muscle cell action potential involved in contraction	BP	46	8	0.0864673	1
GO:0003177	pulmonary valve development	BP	12	3	0.0869867	1
GO:0003184	pulmonary valve morphogenesis	BP	12	3	0.0869867	1
GO:0005008	hepatocyte growth factor-activated receptor activity	MF	1	1	0.0871763	1
GO:1902936	phosphatidylinositol bisphosphate binding	MF	76	10	0.0873223	1
GO:0009346	citrate lyase complex	CC	1	1	0.0873562	1
GO:0003878	ATP citrate synthase activity	MF	1	1	0.0873562	1
GO:0021960	anterior commissure morphogenesis	BP	5	2	0.0874013	1
GO:1900025	negative regulation of substrate adhesion-dependent cell spreading	BP	13	3	0.0874541	1
GO:1990617	CHOP-ATF4 complex	CC	2	1	0.0875112	1
GO:0061311	cell surface receptor signaling pathway involved in heart development	BP	26	5	0.0875177	1
GO:1903055	positive regulation of extracellular matrix organization	BP	17	4	0.0875428	1
GO:0016801	hydrolase activity, acting on ether bonds	MF	9	2	0.0876512	1
GO:0044344	cellular response to fibroblast growth factor stimulus	BP	133	16	0.0878038	1
GO:0048339	paraxial mesoderm development	BP	18	4	0.0878092	1
GO:0050135	NAD(P)+ nucleosidase activity	MF	2	1	0.0878258	1
GO:0061809	NAD+ nucleotidase, cyclic ADP-ribose generating	MF	2	1	0.0878258	1
GO:0086042	cardiac muscle cell-cardiac muscle cell adhesion	BP	7	2	0.0879817	1
GO:0043066	negative regulation of apoptotic process	BP	766	70	0.0879847	1
GO:0061028	establishment of endothelial barrier	BP	37	6	0.0880082	1
GO:0016857	racemase and epimerase activity, acting on carbohydrates and derivatives	MF	8	2	0.0880148	1
GO:0039007	pronephric nephron morphogenesis	BP	1	1	0.0881398	1
GO:0039008	pronephric nephron tubule morphogenesis	BP	1	1	0.0881398	1
GO:0039022	pronephric duct development	BP	1	1	0.0881398	1
GO:0039023	pronephric duct morphogenesis	BP	1	1	0.0881398	1
GO:0070121	Kupffer's vesicle development	BP	1	1	0.0881398	1
GO:0014809	regulation of skeletal muscle contraction by regulation of release of sequestered calcium ion	BP	3	1	0.0881743	1
GO:0072203	cell proliferation involved in metanephros development	BP	9	3	0.0886035	1
GO:0048483	autonomic nervous system development	BP	42	8	0.0886636	1
GO:0051213	dioxygenase activity	MF	82	10	0.0887234	1
GO:0033549	MAP kinase phosphatase activity	MF	12	3	0.0888477	1
GO:0008191	metalloendopeptidase inhibitor activity	MF	14	3	0.0888739	1
GO:0010830	regulation of myotube differentiation	BP	53	8	0.0891126	1
GO:0051645	Golgi localization	BP	12	3	0.0891384	1
GO:0050730	regulation of peptidyl-tyrosine phosphorylation	BP	215	22	0.089245	1
GO:0050902	leukocyte adhesive activation	BP	2	1	0.0895136	1
GO:0036488	CHOP-C/EBP complex	CC	2	1	0.0895211	1
GO:2000824	negative regulation of androgen receptor activity	BP	2	1	0.0897267	1
GO:0070822	Sin3-type complex	CC	16	3	0.0897747	1
GO:0048863	stem cell differentiation	BP	161	21	0.0898618	1
GO:0036413	histone H3-R26 citrullination	BP	2	1	0.0899312	1
GO:0010927	cellular component assembly involved in morphogenesis	BP	96	12	0.0899695	1
GO:0016757	transferase activity, transferring glycosyl groups	MF	262	24	0.0900853	1
GO:0070302	regulation of stress-activated protein kinase signaling cascade	BP	195	22	0.0901269	1
GO:1900246	positive regulation of RIG-I signaling pathway	BP	7	2	0.0901695	1
GO:0050855	regulation of B cell receptor signaling pathway	BP	14	3	0.090376	1
GO:0097502	mannosylation	BP	32	4	0.0903798	1
GO:0002520	immune system development	BP	761	69	0.0905521	1
GO:0045105	intermediate filament polymerization or depolymerization	BP	2	1	0.0905614	1
GO:0071397	cellular response to cholesterol	BP	13	3	0.0907786	1
GO:0050905	neuromuscular process	BP	99	14	0.0915356	1
GO:0009448	gamma-aminobutyric acid metabolic process	BP	5	2	0.0917488	1
GO:1902916	positive regulation of protein polyubiquitination	BP	8	2	0.0920483	1
GO:0022029	telencephalon cell migration	BP	53	9	0.0920528	1
GO:0019219	regulation of nucleobase-containing compound metabolic process	BP	3812	302	0.0922404	1
GO:0097731	9+0 non-motile cilium	CC	91	10	0.0922904	1
GO:0097733	photoreceptor cell cilium	CC	91	10	0.0922904	1
GO:0036474	cell death in response to hydrogen peroxide	BP	23	4	0.0923428	1
GO:0005930	axoneme	CC	98	11	0.0923667	1
GO:0097014	ciliary plasm	CC	98	11	0.0923667	1
GO:0010624	regulation of Schwann cell proliferation	BP	5	2	0.0925278	1
GO:0010626	negative regulation of Schwann cell proliferation	BP	5	2	0.0925278	1
GO:0033088	negative regulation of immature T cell proliferation in thymus	BP	4	2	0.0926128	1
GO:0071680	response to indole-3-methanol	BP	5	2	0.0926455	1
GO:0071681	cellular response to indole-3-methanol	BP	5	2	0.0926455	1
GO:0030145	manganese ion binding	MF	48	6	0.092982	1
GO:0003168	Purkinje myocyte differentiation	BP	1	1	0.0931631	1
GO:0060927	cardiac pacemaker cell fate commitment	BP	1	1	0.0931631	1
GO:0060929	atrioventricular node cell fate commitment	BP	1	1	0.0931631	1
GO:1903672	positive regulation of sprouting angiogenesis	BP	12	3	0.0932285	1
GO:2000279	negative regulation of DNA biosynthetic process	BP	30	5	0.0933169	1
GO:0010771	negative regulation of cell morphogenesis involved in differentiation	BP	70	11	0.0935128	1
GO:0030850	prostate gland development	BP	44	7	0.0935166	1
GO:0035799	ureter maturation	BP	4	2	0.0937964	1
GO:0044319	wound healing, spreading of cells	BP	27	5	0.0941054	1
GO:0090505	epiboly involved in wound healing	BP	27	5	0.0941054	1
GO:0097306	cellular response to alcohol	BP	52	8	0.0941971	1
GO:2000345	regulation of hepatocyte proliferation	BP	14	3	0.0944007	1
GO:2000723	negative regulation of cardiac vascular smooth muscle cell differentiation	BP	1	1	0.0944431	1
GO:0016638	oxidoreductase activity, acting on the CH-NH2 group of donors	MF	17	3	0.0946184	1
GO:0031224	intrinsic component of membrane	CC	4939	342	0.0946303	1
GO:1902667	regulation of axon guidance	BP	20	5	0.0946891	1
GO:0007039	protein catabolic process in the vacuole	BP	6	2	0.0952224	1
GO:0001159	core promoter proximal region DNA binding	MF	337	38	0.0953443	1
GO:2000177	regulation of neural precursor cell proliferation	BP	73	11	0.0954994	1
GO:1901246	regulation of lung ciliated cell differentiation	BP	2	1	0.0955178	1
GO:0044282	small molecule catabolic process	BP	335	29	0.0957785	1
GO:0072320	volume-sensitive chloride channel activity	MF	2	1	0.0958412	1
GO:0007468	regulation of rhodopsin gene expression	BP	3	1	0.0958921	1
GO:0072093	metanephric renal vesicle formation	BP	4	2	0.0960937	1
GO:0003837	beta-ureidopropionase activity	MF	1	1	0.0962998	1
GO:0048666	neuron development	BP	928	101	0.0965312	1
GO:0021783	preganglionic parasympathetic fiber development	BP	15	4	0.0965619	1
GO:0039535	regulation of RIG-I signaling pathway	BP	15	3	0.0966005	1
GO:0043433	negative regulation of sequence-specific DNA binding transcription factor activity	BP	122	14	0.0966163	1
GO:0032757	positive regulation of interleukin-8 production	BP	41	5	0.0967924	1
GO:0017049	GTP-Rho binding	MF	17	3	0.0969636	1
GO:0061318	renal filtration cell differentiation	BP	18	4	0.0971177	1
GO:0072112	glomerular visceral epithelial cell differentiation	BP	18	4	0.0971177	1
GO:0036313	phosphatidylinositol 3-kinase catalytic subunit binding	MF	2	1	0.097646	1
GO:1902106	negative regulation of leukocyte differentiation	BP	81	10	0.0978023	1
GO:0060314	regulation of ryanodine-sensitive calcium-release channel activity	BP	24	4	0.0980611	1
GO:0060326	cell chemotaxis	BP	236	20	0.0982756	1
GO:0070570	regulation of neuron projection regeneration	BP	25	5	0.0983053	1
GO:0098528	skeletal muscle fiber differentiation	BP	5	2	0.0984018	1
GO:0016055	Wnt signaling pathway	BP	451	49	0.0984209	1
GO:0003183	mitral valve morphogenesis	BP	10	3	0.098512	1
GO:0070268	cornification	BP	109	7	0.0985165	1
GO:0035754	B cell chemotaxis	BP	7	2	0.0985446	1
GO:0010629	negative regulation of gene expression	BP	1542	133	0.0986672	1
GO:0009166	nucleotide catabolic process	BP	62	8	0.0987488	1
GO:0008107	galactoside 2-alpha-L-fucosyltransferase activity	MF	2	1	0.0987519	1
GO:0031127	alpha-(1,2)-fucosyltransferase activity	MF	2	1	0.0987519	1
GO:2001257	regulation of cation channel activity	BP	121	15	0.098893	1
GO:0044154	histone H3-K14 acetylation	BP	7	2	0.0991757	1
GO:0051138	positive regulation of NK T cell differentiation	BP	4	2	0.0993874	1
GO:0086008	voltage-gated potassium channel activity involved in cardiac muscle cell action potential repolarization	MF	11	3	0.0993993	1
GO:0019673	GDP-mannose metabolic process	BP	7	2	0.0994495	1
GO:0045989	positive regulation of striated muscle contraction	BP	13	3	0.0994696	1
GO:0030548	acetylcholine receptor regulator activity	MF	6	2	0.0995801	1
GO:0099602	neurotransmitter receptor regulator activity	MF	6	2	0.0995801	1
GO:0045060	negative thymic T cell selection	BP	12	3	0.0997172	1
GO:0060323	head morphogenesis	BP	32	6	0.09975	1
GO:0090269	fibroblast growth factor production	BP	6	2	0.100221	1
GO:0090270	regulation of fibroblast growth factor production	BP	6	2	0.100221	1
GO:0008544	epidermis development	BP	421	29	0.100414	1
GO:0060972	left/right pattern formation	BP	20	4	0.100469	1
GO:0019005	SCF ubiquitin ligase complex	CC	50	7	0.100602	1
GO:0043000	Golgi to plasma membrane CFTR protein transport	BP	2	1	0.100695	1
GO:0016338	calcium-independent cell-cell adhesion via plasma membrane cell-adhesion molecules	BP	22	3	0.100701	1
GO:0060307	regulation of ventricular cardiac muscle cell membrane repolarization	BP	18	4	0.100884	1
GO:0070314	G1 to G0 transition	BP	9	2	0.100929	1
GO:0007350	blastoderm segmentation	BP	18	4	0.100971	1
GO:0005248	voltage-gated sodium channel activity	MF	23	4	0.101194	1
GO:1905030	voltage-gated ion channel activity involved in regulation of postsynaptic membrane potential	MF	23	4	0.101194	1
GO:0010660	regulation of muscle cell apoptotic process	BP	47	7	0.101206	1
GO:0043651	linoleic acid metabolic process	BP	16	3	0.101256	1
GO:0004816	asparagine-tRNA ligase activity	MF	2	1	0.101284	1
GO:0050480	imidazolonepropionase activity	MF	1	1	0.101392	1
GO:1902547	regulation of cellular response to vascular endothelial growth factor stimulus	BP	12	3	0.101409	1
GO:0098751	bone cell development	BP	32	6	0.101602	1
GO:0006367	transcription initiation from RNA polymerase II promoter	BP	164	18	0.101638	1
GO:0010863	positive regulation of phospholipase C activity	BP	35	5	0.101662	1
GO:0033087	negative regulation of immature T cell proliferation	BP	5	2	0.101793	1
GO:0014732	skeletal muscle atrophy	BP	8	2	0.101889	1
GO:0030501	positive regulation of bone mineralization	BP	34	6	0.101924	1
GO:0008396	oxysterol 7-alpha-hydroxylase activity	MF	2	1	0.102072	1
GO:0003140	determination of left/right asymmetry in lateral mesoderm	BP	8	2	0.102105	1
GO:1904106	protein localization to microvillus	BP	2	1	0.102259	1
GO:0036156	inner dynein arm	CC	2	1	0.102293	1
GO:0198738	cell-cell signaling by wnt	BP	452	49	0.102327	1
GO:0010556	regulation of macromolecule biosynthetic process	BP	3792	299	0.102452	1
GO:0031407	oxylipin metabolic process	BP	1	1	0.102509	1
GO:0097176	epoxide metabolic process	BP	1	1	0.102509	1
GO:1901751	leukotriene A4 metabolic process	BP	1	1	0.102509	1
GO:2001304	lipoxin B4 metabolic process	BP	1	1	0.102509	1
GO:2001306	lipoxin B4 biosynthetic process	BP	1	1	0.102509	1
GO:0009954	proximal/distal pattern formation	BP	31	6	0.102737	1
GO:0004772	sterol O-acyltransferase activity	MF	2	1	0.103012	1
GO:0034736	cholesterol O-acyltransferase activity	MF	2	1	0.103012	1
GO:0061371	determination of heart left/right asymmetry	BP	62	9	0.103382	1
GO:0016078	tRNA catabolic process	BP	3	1	0.103399	1
GO:0034683	integrin alphav-beta3 complex	CC	2	1	0.103605	1
GO:0002041	intussusceptive angiogenesis	BP	1	1	0.103609	1
GO:0071774	response to fibroblast growth factor	BP	138	16	0.103886	1
GO:0031076	embryonic camera-type eye development	BP	35	7	0.104235	1
GO:0060113	inner ear receptor cell differentiation	BP	53	8	0.104474	1
GO:0050923	regulation of negative chemotaxis	BP	4	2	0.104591	1
GO:0086028	bundle of His cell to Purkinje myocyte signaling	BP	7	2	0.10476	1
GO:0086043	bundle of His cell action potential	BP	7	2	0.10476	1
GO:0043551	regulation of phosphatidylinositol 3-kinase activity	BP	40	7	0.104878	1
GO:2000679	positive regulation of transcription regulatory region DNA binding	BP	22	4	0.104888	1
GO:1902533	positive regulation of intracellular signal transduction	BP	860	74	0.104915	1
GO:1990712	HFE-transferrin receptor complex	CC	8	2	0.104931	1
GO:0004499	N,N-dimethylaniline monooxygenase activity	MF	5	1	0.104967	1
GO:0009898	cytoplasmic side of plasma membrane	CC	157	19	0.104995	1
GO:0071435	potassium ion export	BP	12	3	0.105098	1
GO:0010544	negative regulation of platelet activation	BP	17	4	0.105101	1
GO:0000256	allantoin catabolic process	BP	1	1	0.10512	1
GO:0004037	allantoicase activity	MF	1	1	0.10512	1
GO:0045180	basal cortex	CC	5	2	0.105195	1
GO:0043383	negative T cell selection	BP	13	3	0.1052	1
GO:1990036	calcium ion import into sarcoplasmic reticulum	BP	3	1	0.105206	1
GO:0035338	long-chain fatty-acyl-CoA biosynthetic process	BP	41	6	0.105215	1
GO:0021670	lateral ventricle development	BP	11	3	0.105456	1
GO:0048630	skeletal muscle tissue growth	BP	7	2	0.105595	1
GO:1901373	lipid hydroperoxide transport	BP	1	1	0.105662	1
GO:0033814	propanoyl-CoA C-acyltransferase activity	MF	1	1	0.105662	1
GO:0050632	propionyl-CoA C2-trimethyltridecanoyltransferase activity	MF	1	1	0.105662	1
GO:1902459	positive regulation of stem cell population maintenance	BP	5	2	0.105724	1
GO:0004020	adenylylsulfate kinase activity	MF	2	1	0.105929	1
GO:0004779	sulfate adenylyltransferase activity	MF	2	1	0.105929	1
GO:0004781	sulfate adenylyltransferase (ATP) activity	MF	2	1	0.105929	1
GO:0044036	cell wall macromolecule metabolic process	BP	5	1	0.105972	1
GO:0071554	cell wall organization or biogenesis	BP	5	1	0.105972	1
GO:0001706	endoderm formation	BP	54	8	0.105991	1
GO:0000062	fatty-acyl-CoA binding	MF	16	3	0.106324	1
GO:1905940	negative regulation of gonad development	BP	5	2	0.106581	1
GO:0032231	regulation of actin filament bundle assembly	BP	81	11	0.106686	1
GO:0060876	semicircular canal formation	BP	2	1	0.106688	1
GO:0030038	contractile actin filament bundle assembly	BP	79	11	0.10669	1
GO:0043149	stress fiber assembly	BP	79	11	0.10669	1
GO:0006313	transposition, DNA-mediated	BP	2	1	0.106755	1
GO:0004803	transposase activity	MF	2	1	0.106755	1
GO:1900738	positive regulation of phospholipase C-activating G-protein coupled receptor signaling pathway	BP	3	1	0.106857	1
GO:0060327	cytoplasmic actin-based contraction involved in cell motility	BP	2	1	0.106882	1
GO:0021983	pituitary gland development	BP	40	7	0.107017	1
GO:0033600	negative regulation of mammary gland epithelial cell proliferation	BP	5	2	0.107186	1
GO:0072310	glomerular epithelial cell development	BP	13	3	0.107313	1
GO:0086003	cardiac muscle cell contraction	BP	56	9	0.107477	1
GO:0055007	cardiac muscle cell differentiation	BP	95	13	0.107497	1
GO:0010875	positive regulation of cholesterol efflux	BP	14	3	0.107589	1
GO:0061045	negative regulation of wound healing	BP	63	8	0.107654	1
GO:0042421	norepinephrine biosynthetic process	BP	7	2	0.107857	1
GO:0017127	cholesterol transporter activity	MF	17	3	0.107915	1
GO:0030833	regulation of actin filament polymerization	BP	136	15	0.108137	1
GO:0060428	lung epithelium development	BP	40	6	0.108221	1
GO:0005901	caveola	CC	71	10	0.108229	1
GO:0021869	forebrain ventricular zone progenitor cell division	BP	6	2	0.108399	1
GO:0004888	transmembrane signaling receptor activity	MF	1103	67	0.108578	1
GO:0001547	antral ovarian follicle growth	BP	6	2	0.108751	1
GO:0098640	integrin binding involved in cell-matrix adhesion	MF	2	1	0.108889	1
GO:0032879	regulation of localization	BP	2353	202	0.108975	1
GO:0072234	metanephric nephron tubule development	BP	20	4	0.109073	1
GO:0036314	response to sterol	BP	24	4	0.109191	1
GO:0003249	cell proliferation involved in heart valve morphogenesis	BP	2	1	0.109259	1
GO:0003250	regulation of cell proliferation involved in heart valve morphogenesis	BP	2	1	0.109259	1
GO:0060419	heart growth	BP	71	11	0.109304	1
GO:0042462	eye photoreceptor cell development	BP	31	4	0.10954	1
GO:0086065	cell communication involved in cardiac conduction	BP	51	8	0.109619	1
GO:0071460	cellular response to cell-matrix adhesion	BP	2	1	0.109772	1
GO:0060306	regulation of membrane repolarization	BP	28	5	0.109777	1
GO:0072523	purine-containing compound catabolic process	BP	50	7	0.110062	1
GO:0072330	monocarboxylic acid biosynthetic process	BP	185	17	0.110091	1
GO:0050928	negative regulation of positive chemotaxis	BP	1	1	0.110152	1
GO:0043218	compact myelin	CC	14	3	0.110398	1
GO:0034721	histone H3-K4 demethylation, trimethyl-H3-K4-specific	BP	2	1	0.110522	1
GO:0034647	histone demethylase activity (H3-trimethyl-K4 specific)	MF	2	1	0.110522	1
GO:0003174	mitral valve development	BP	11	3	0.110706	1
GO:0021871	forebrain regionalization	BP	24	5	0.110738	1
GO:0005608	laminin-3 complex	CC	2	1	0.110901	1
GO:0036219	GTP diphosphatase activity	MF	1	1	0.111218	1
GO:0044713	2-hydroxy-adenosine triphosphate pyrophosphatase activity	MF	1	1	0.111218	1
GO:0044714	2-hydroxy-(deoxy)adenosine-triphosphate pyrophosphatase activity	MF	1	1	0.111218	1
GO:0047693	ATP diphosphatase activity	MF	1	1	0.111218	1
GO:0060055	angiogenesis involved in wound healing	BP	18	3	0.111376	1
GO:0042799	histone methyltransferase activity (H4-K20 specific)	MF	5	2	0.111556	1
GO:0050769	positive regulation of neurogenesis	BP	374	43	0.111618	1
GO:0033598	mammary gland epithelial cell proliferation	BP	27	5	0.111676	1
GO:0022409	positive regulation of cell-cell adhesion	BP	235	23	0.111779	1
GO:0007256	activation of JNKK activity	BP	5	2	0.112083	1
GO:0032534	regulation of microvillus assembly	BP	6	2	0.112235	1
GO:0035641	locomotory exploration behavior	BP	12	3	0.112363	1
GO:0030878	thyroid gland development	BP	24	5	0.112467	1
GO:0009893	positive regulation of metabolic process	BP	2947	247	0.112769	1
GO:0072540	T-helper 17 cell lineage commitment	BP	12	2	0.112876	1
GO:0046949	fatty-acyl-CoA biosynthetic process	BP	42	6	0.113074	1
GO:0006218	uridine catabolic process	BP	1	1	0.113164	1
GO:0021560	abducens nerve development	BP	2	1	0.11326	1
GO:0021598	abducens nerve morphogenesis	BP	2	1	0.11326	1
GO:0021599	abducens nerve formation	BP	2	1	0.11326	1
GO:0007095	mitotic G2 DNA damage checkpoint	BP	15	3	0.113391	1
GO:0001550	ovarian cumulus expansion	BP	2	1	0.113528	1
GO:0048165	fused antrum stage	BP	2	1	0.113528	1
GO:0033185	dolichol-phosphate-mannose synthase complex	CC	3	1	0.113663	1
GO:0004582	dolichyl-phosphate beta-D-mannosyltransferase activity	MF	3	1	0.113663	1
GO:0090504	epiboly	BP	28	5	0.113698	1
GO:0098858	actin-based cell projection	CC	177	20	0.11371	1
GO:0002027	regulation of heart rate	BP	87	11	0.113731	1
GO:1904259	regulation of basement membrane assembly involved in embryonic body morphogenesis	BP	5	2	0.114169	1
GO:1904261	positive regulation of basement membrane assembly involved in embryonic body morphogenesis	BP	5	2	0.114169	1
GO:2001197	basement membrane assembly involved in embryonic body morphogenesis	BP	5	2	0.114169	1
GO:0009008	DNA-methyltransferase activity	MF	5	2	0.114282	1
GO:0003161	cardiac conduction system development	BP	13	3	0.114415	1
GO:0030202	heparin metabolic process	BP	8	2	0.114666	1
GO:0030210	heparin biosynthetic process	BP	8	2	0.114666	1
GO:0045661	regulation of myoblast differentiation	BP	47	6	0.1148	1
GO:0060548	negative regulation of cell death	BP	846	75	0.11503	1
GO:0061218	negative regulation of mesonephros development	BP	6	2	0.11517	1
GO:0021885	forebrain cell migration	BP	56	9	0.115232	1
GO:0000400	four-way junction DNA binding	MF	15	3	0.115384	1
GO:0044323	retinoic acid-responsive element binding	MF	4	2	0.115472	1
GO:0010641	positive regulation of platelet-derived growth factor receptor signaling pathway	BP	5	2	0.115587	1
GO:0002724	regulation of T cell cytokine production	BP	18	3	0.115639	1
GO:0051040	regulation of calcium-independent cell-cell adhesion	BP	2	1	0.115683	1
GO:0043954	cellular component maintenance	BP	28	5	0.115704	1
GO:0016021	integral component of membrane	CC	4819	331	0.115807	1
GO:0033961	cis-stilbene-oxide hydrolase activity	MF	1	1	0.116001	1
GO:0097411	hypoxia-inducible factor-1alpha signaling pathway	BP	3	1	0.1161	1
GO:0034988	Fc-gamma receptor I complex binding	MF	1	1	0.116203	1
GO:1904158	axonemal central apparatus assembly	BP	3	1	0.116403	1
GO:0061046	regulation of branching involved in lung morphogenesis	BP	6	2	0.116416	1
GO:1903589	positive regulation of blood vessel endothelial cell proliferation involved in sprouting angiogenesis	BP	1	1	0.116763	1
GO:0019285	glycine betaine biosynthetic process from choline	BP	2	1	0.116778	1
GO:0031455	glycine betaine metabolic process	BP	2	1	0.116778	1
GO:0031456	glycine betaine biosynthetic process	BP	2	1	0.116778	1
GO:0035745	T-helper 2 cell cytokine production	BP	9	2	0.116801	1
GO:0060763	mammary duct terminal end bud growth	BP	3	1	0.116843	1
GO:0003165	Purkinje myocyte development	BP	2	1	0.116935	1
GO:0007159	leukocyte cell-cell adhesion	BP	330	28	0.117058	1
GO:2001301	lipoxin biosynthetic process	BP	2	1	0.117244	1
GO:2001302	lipoxin A4 metabolic process	BP	2	1	0.117244	1
GO:2001303	lipoxin A4 biosynthetic process	BP	2	1	0.117244	1
GO:0047977	hepoxilin-epoxide hydrolase activity	MF	2	1	0.117244	1
GO:0017160	Ral GTPase binding	MF	12	3	0.117247	1
GO:0009305	protein biotinylation	BP	1	1	0.117322	1
GO:0070781	response to biotin	BP	1	1	0.117322	1
GO:0071110	histone biotinylation	BP	1	1	0.117322	1
GO:0004077	biotin-[acetyl-CoA-carboxylase] ligase activity	MF	1	1	0.117322	1
GO:0004078	biotin-[methylcrotonoyl-CoA-carboxylase] ligase activity	MF	1	1	0.117322	1
GO:0004079	biotin-[methylmalonyl-CoA-carboxytransferase] ligase activity	MF	1	1	0.117322	1
GO:0004080	biotin-[propionyl-CoA-carboxylase (ATP-hydrolyzing)] ligase activity	MF	1	1	0.117322	1
GO:0018271	biotin-protein ligase activity	MF	1	1	0.117322	1
GO:0042117	monocyte activation	BP	8	2	0.117413	1
GO:2000810	regulation of bicellular tight junction assembly	BP	16	3	0.117425	1
GO:0014010	Schwann cell proliferation	BP	6	2	0.117435	1
GO:0006579	amino-acid betaine catabolic process	BP	3	1	0.117495	1
GO:0032532	regulation of microvillus length	BP	7	2	0.117505	1
GO:0051102	DNA ligation involved in DNA recombination	BP	1	1	0.117769	1
GO:0030882	lipid antigen binding	MF	5	1	0.118036	1
GO:0030883	endogenous lipid antigen binding	MF	5	1	0.118036	1
GO:0030884	exogenous lipid antigen binding	MF	5	1	0.118036	1
GO:0055017	cardiac muscle tissue growth	BP	65	10	0.118181	1
GO:0035050	embryonic heart tube development	BP	73	10	0.118234	1
GO:0042326	negative regulation of phosphorylation	BP	419	42	0.11847	1
GO:0008144	drug binding	MF	94	10	0.11868	1
GO:0008289	lipid binding	MF	616	54	0.118771	1
GO:0051919	positive regulation of fibrinolysis	BP	4	1	0.118811	1
GO:0043457	regulation of cellular respiration	BP	23	4	0.118852	1
GO:1990459	transferrin receptor binding	MF	8	2	0.118905	1
GO:0003230	cardiac atrium development	BP	35	6	0.118951	1
GO:0031572	G2 DNA damage checkpoint	BP	34	5	0.119014	1
GO:0050926	regulation of positive chemotaxis	BP	24	4	0.119124	1
GO:0048390	intermediate mesoderm morphogenesis	BP	1	1	0.119149	1
GO:0048391	intermediate mesoderm formation	BP	1	1	0.119149	1
GO:0048392	intermediate mesodermal cell differentiation	BP	1	1	0.119149	1
GO:0055018	regulation of cardiac muscle fiber development	BP	1	1	0.119149	1
GO:0055020	positive regulation of cardiac muscle fiber development	BP	1	1	0.119149	1
GO:0060503	bud dilation involved in lung branching	BP	1	1	0.119149	1
GO:0061149	BMP signaling pathway involved in ureter morphogenesis	BP	1	1	0.119149	1
GO:0061150	renal system segmentation	BP	1	1	0.119149	1
GO:0061151	BMP signaling pathway involved in renal system segmentation	BP	1	1	0.119149	1
GO:0061155	pulmonary artery endothelial tube morphogenesis	BP	1	1	0.119149	1
GO:0061216	regulation of transcription from RNA polymerase II promoter involved in mesonephros development	BP	1	1	0.119149	1
GO:0071893	BMP signaling pathway involved in nephric duct formation	BP	1	1	0.119149	1
GO:0072096	negative regulation of branch elongation involved in ureteric bud branching	BP	1	1	0.119149	1
GO:0072097	negative regulation of branch elongation involved in ureteric bud branching by BMP signaling pathway	BP	1	1	0.119149	1
GO:0072099	anterior/posterior pattern specification involved in ureteric bud development	BP	1	1	0.119149	1
GO:0072100	specification of ureteric bud anterior/posterior symmetry	BP	1	1	0.119149	1
GO:0072101	specification of ureteric bud anterior/posterior symmetry by BMP signaling pathway	BP	1	1	0.119149	1
GO:0072192	ureter epithelial cell differentiation	BP	1	1	0.119149	1
GO:0072200	negative regulation of mesenchymal cell proliferation involved in ureter development	BP	1	1	0.119149	1
GO:1901964	positive regulation of cell proliferation involved in outflow tract morphogenesis	BP	1	1	0.119149	1
GO:2000004	regulation of metanephric S-shaped body morphogenesis	BP	1	1	0.119149	1
GO:2000005	negative regulation of metanephric S-shaped body morphogenesis	BP	1	1	0.119149	1
GO:2000006	regulation of metanephric comma-shaped body morphogenesis	BP	1	1	0.119149	1
GO:2000007	negative regulation of metanephric comma-shaped body morphogenesis	BP	1	1	0.119149	1
GO:0021998	neural plate mediolateral regionalization	BP	1	1	0.119215	1
GO:0048338	mesoderm structural organization	BP	1	1	0.119215	1
GO:0048352	paraxial mesoderm structural organization	BP	1	1	0.119215	1
GO:1904412	regulation of cardiac ventricle development	BP	1	1	0.119215	1
GO:1904414	positive regulation of cardiac ventricle development	BP	1	1	0.119215	1
GO:1905285	fibrous ring of heart morphogenesis	BP	1	1	0.119215	1
GO:0051584	regulation of dopamine uptake involved in synaptic transmission	BP	8	2	0.119384	1
GO:0051940	regulation of catecholamine uptake involved in synaptic transmission	BP	8	2	0.119384	1
GO:0038030	non-canonical Wnt signaling pathway via MAPK cascade	BP	7	2	0.119592	1
GO:0044447	axoneme part	CC	28	4	0.119592	1
GO:0072179	nephric duct formation	BP	5	2	0.119638	1
GO:0010991	negative regulation of SMAD protein complex assembly	BP	5	2	0.119766	1
GO:0030041	actin filament polymerization	BP	149	16	0.119921	1
GO:0090247	cell motility involved in somitogenic axis elongation	BP	1	1	0.119969	1
GO:0090249	regulation of cell motility involved in somitogenic axis elongation	BP	1	1	0.119969	1
GO:1901229	regulation of non-canonical Wnt signaling pathway via JNK cascade	BP	1	1	0.119969	1
GO:1901231	positive regulation of non-canonical Wnt signaling pathway via JNK cascade	BP	1	1	0.119969	1
GO:1901232	regulation of convergent extension involved in axis elongation	BP	1	1	0.119969	1
GO:1901233	negative regulation of convergent extension involved in axis elongation	BP	1	1	0.119969	1
GO:0016165	linoleate 13S-lipoxygenase activity	MF	2	1	0.11997	1
GO:0055117	regulation of cardiac muscle contraction	BP	67	9	0.120112	1
GO:0070169	positive regulation of biomineral tissue development	BP	37	6	0.120142	1
GO:0048841	regulation of axon extension involved in axon guidance	BP	15	4	0.120464	1
GO:0019814	immunoglobulin complex	CC	5	1	0.12048	1
GO:0005501	retinoid binding	MF	31	5	0.120549	1
GO:0000710	meiotic mismatch repair	BP	2	1	0.120551	1
GO:0035502	metanephric part of ureteric bud development	BP	6	2	0.120728	1
GO:0043196	varicosity	CC	8	2	0.120869	1
GO:0047888	fatty acid peroxidase activity	MF	1	1	0.121007	1
GO:0072378	blood coagulation, fibrin clot formation	BP	25	3	0.12116	1
GO:0072165	anterior mesonephric tubule development	BP	1	1	0.121161	1
GO:0072167	specification of mesonephric tubule identity	BP	1	1	0.121161	1
GO:0072168	specification of anterior mesonephric tubule identity	BP	1	1	0.121161	1
GO:0072169	specification of posterior mesonephric tubule identity	BP	1	1	0.121161	1
GO:0072184	renal vesicle progenitor cell differentiation	BP	1	1	0.121161	1
GO:0072258	metanephric interstitial fibroblast differentiation	BP	1	1	0.121161	1
GO:0072259	metanephric interstitial fibroblast development	BP	1	1	0.121161	1
GO:0007264	small GTPase mediated signal transduction	BP	456	47	0.12129	1
GO:0021615	glossopharyngeal nerve morphogenesis	BP	4	2	0.12129	1
GO:0021570	rhombomere 4 development	BP	2	1	0.121798	1
GO:2000178	negative regulation of neural precursor cell proliferation	BP	18	4	0.121875	1
GO:0005395	eye pigment precursor transporter activity	MF	1	1	0.121954	1
GO:0050868	negative regulation of T cell activation	BP	86	8	0.122026	1
GO:0003953	NAD+ nucleosidase activity	MF	3	1	0.122152	1
GO:0005381	iron ion transmembrane transporter activity	MF	9	2	0.122257	1
GO:0042629	mast cell granule	CC	21	3	0.122698	1
GO:0035252	UDP-xylosyltransferase activity	MF	8	2	0.122781	1
GO:0042285	xylosyltransferase activity	MF	8	2	0.122781	1
GO:1903725	regulation of phospholipid metabolic process	BP	60	9	0.122919	1
GO:0072103	glomerulus vasculature morphogenesis	BP	5	2	0.123035	1
GO:0072104	glomerular capillary formation	BP	5	2	0.123035	1
GO:0030864	cortical actin cytoskeleton	CC	52	8	0.123234	1
GO:0039529	RIG-I signaling pathway	BP	18	3	0.123319	1
GO:0072244	metanephric glomerular epithelium development	BP	3	1	0.12348	1
GO:0072248	metanephric glomerular visceral epithelial cell differentiation	BP	3	1	0.12348	1
GO:0072249	metanephric glomerular visceral epithelial cell development	BP	3	1	0.12348	1
GO:0072312	metanephric glomerular epithelial cell differentiation	BP	3	1	0.12348	1
GO:0072313	metanephric glomerular epithelial cell development	BP	3	1	0.12348	1
GO:1904354	negative regulation of telomere capping	BP	8	2	0.123538	1
GO:0071396	cellular response to lipid	BP	512	47	0.123549	1
GO:0046329	negative regulation of JNK cascade	BP	33	5	0.123741	1
GO:0071900	regulation of protein serine/threonine kinase activity	BP	457	44	0.123753	1
GO:0051345	positive regulation of hydrolase activity	BP	887	82	0.12382	1
GO:0060831	smoothened signaling pathway involved in dorsal/ventral neural tube patterning	BP	14	3	0.123892	1
GO:0003299	muscle hypertrophy in response to stress	BP	19	4	0.124194	1
GO:0014887	cardiac muscle adaptation	BP	19	4	0.124194	1
GO:0014898	cardiac muscle hypertrophy in response to stress	BP	19	4	0.124194	1
GO:0010226	response to lithium ion	BP	23	4	0.12488	1
GO:0002551	mast cell chemotaxis	BP	11	2	0.124947	1
GO:0030030	cell projection organization	BP	1269	125	0.12498	1
GO:0046365	monosaccharide catabolic process	BP	57	7	0.125038	1
GO:0097057	TRAF2-GSTP1 complex	CC	2	1	0.125089	1
GO:0095500	acetylcholine receptor signaling pathway	BP	22	4	0.125265	1
GO:1903831	signal transduction involved in cellular response to ammonium ion	BP	22	4	0.125265	1
GO:1905144	response to acetylcholine	BP	22	4	0.125265	1
GO:1905145	cellular response to acetylcholine	BP	22	4	0.125265	1
GO:0046328	regulation of JNK cascade	BP	158	18	0.125375	1
GO:0001948	glycoprotein binding	MF	97	12	0.12552	1
GO:0001934	positive regulation of protein phosphorylation	BP	839	73	0.125529	1
GO:0022414	reproductive process	BP	1254	97	0.126072	1
GO:0072673	lamellipodium morphogenesis	BP	15	3	0.126289	1
GO:1990442	intrinsic apoptotic signaling pathway in response to nitrosative stress	BP	3	1	0.126426	1
GO:0016053	organic acid biosynthetic process	BP	284	24	0.126609	1
GO:0046394	carboxylic acid biosynthetic process	BP	284	24	0.126609	1
GO:0000003	reproduction	BP	1255	97	0.126715	1
GO:0007183	SMAD protein complex assembly	BP	14	3	0.126803	1
GO:0034359	mature chylomicron	CC	1	1	0.127043	1
GO:0034360	chylomicron remnant	CC	1	1	0.127043	1
GO:0046649	lymphocyte activation	BP	575	48	0.127207	1
GO:2001053	regulation of mesenchymal cell apoptotic process	BP	11	3	0.127229	1
GO:0046108	uridine metabolic process	BP	2	1	0.127449	1
GO:0004850	uridine phosphorylase activity	MF	2	1	0.127449	1
GO:0019220	regulation of phosphate metabolic process	BP	1531	129	0.1275	1
GO:0046632	alpha-beta T cell differentiation	BP	85	10	0.127701	1
GO:0035051	cardiocyte differentiation	BP	119	16	0.127827	1
GO:0031098	stress-activated protein kinase signaling cascade	BP	244	25	0.127879	1
GO:0006013	mannose metabolic process	BP	8	2	0.127899	1
GO:0030228	lipoprotein particle receptor activity	MF	16	3	0.127956	1
GO:0033504	floor plate development	BP	7	2	0.128055	1
GO:0071062	alphav-beta3 integrin-vitronectin complex	CC	3	1	0.128185	1
GO:0003009	skeletal muscle contraction	BP	36	5	0.128285	1
GO:0035264	multicellular organism growth	BP	139	16	0.128364	1
GO:0035938	estradiol secretion	BP	3	1	0.128386	1
GO:2000864	regulation of estradiol secretion	BP	3	1	0.128386	1
GO:0042805	actinin binding	MF	39	6	0.128436	1
GO:1900276	regulation of proteinase activated receptor activity	BP	1	1	0.128459	1
GO:1900737	negative regulation of phospholipase C-activating G-protein coupled receptor signaling pathway	BP	1	1	0.128459	1
GO:0039713	viral factory	CC	1	1	0.128459	1
GO:0039714	cytoplasmic viral factory	CC	1	1	0.128459	1
GO:0072517	host cell viral assembly compartment	CC	1	1	0.128459	1
GO:0060170	ciliary membrane	CC	75	8	0.128617	1
GO:0060741	prostate gland stromal morphogenesis	BP	3	1	0.128662	1
GO:0044300	cerebellar mossy fiber	CC	5	2	0.128665	1
GO:0010543	regulation of platelet activation	BP	30	5	0.128705	1
GO:0072074	kidney mesenchyme development	BP	17	4	0.128715	1
GO:0021999	neural plate anterior/posterior regionalization	BP	6	2	0.128905	1
GO:0097494	regulation of vesicle size	BP	2	1	0.128911	1
GO:0050861	positive regulation of B cell receptor signaling pathway	BP	7	2	0.128986	1
GO:0044703	multi-organism reproductive process	BP	859	64	0.129008	1
GO:0090138	regulation of actin cytoskeleton organization by cell-cell adhesion	BP	1	1	0.129057	1
GO:0014902	myotube differentiation	BP	101	13	0.12916	1
GO:0035336	long-chain fatty-acyl-CoA metabolic process	BP	45	6	0.12935	1
GO:0030294	receptor signaling protein tyrosine kinase inhibitor activity	MF	1	1	0.129398	1
GO:1902690	positive regulation of NAD metabolic process	BP	1	1	0.129419	1
GO:1904025	positive regulation of glucose catabolic process to lactate via pyruvate	BP	1	1	0.129419	1
GO:1901888	regulation of cell junction assembly	BP	71	10	0.129714	1
GO:0042574	retinal metabolic process	BP	12	2	0.129808	1
GO:0045715	negative regulation of low-density lipoprotein particle receptor biosynthetic process	BP	3	1	0.129868	1
GO:0045936	negative regulation of phosphate metabolic process	BP	541	52	0.129934	1
GO:0042169	SH2 domain binding	MF	30	5	0.130028	1
GO:0008360	regulation of cell shape	BP	137	16	0.130035	1
GO:0021514	ventral spinal cord interneuron differentiation	BP	16	4	0.130053	1
GO:0031161	phosphatidylinositol catabolic process	BP	1	1	0.130544	1
GO:0043296	apical junction complex	CC	121	14	0.130737	1
GO:0030165	PDZ domain binding	MF	83	11	0.130865	1
GO:0002573	myeloid leukocyte differentiation	BP	178	18	0.130986	1
GO:0002458	peripheral T cell tolerance induction	BP	1	1	0.131052	1
GO:0002465	peripheral tolerance induction	BP	1	1	0.131052	1
GO:0002509	central tolerance induction to self antigen	BP	1	1	0.131052	1
GO:0055012	ventricular cardiac muscle cell differentiation	BP	18	4	0.131353	1
GO:1901505	carbohydrate derivative transporter activity	MF	36	4	0.131366	1
GO:0004756	selenide, water dikinase activity	MF	2	1	0.131366	1
GO:0016781	phosphotransferase activity, paired acceptors	MF	2	1	0.131366	1
GO:0046874	quinolinate metabolic process	BP	5	1	0.131398	1
GO:0039531	regulation of viral-induced cytoplasmic pattern recognition receptor signaling pathway	BP	17	3	0.131456	1
GO:0010563	negative regulation of phosphorus metabolic process	BP	542	52	0.131742	1
GO:0030111	regulation of Wnt signaling pathway	BP	300	33	0.131873	1
GO:0003017	lymph circulation	BP	1	1	0.131874	1
GO:2000765	regulation of cytoplasmic translation	BP	13	3	0.132102	1
GO:0034483	heparan sulfate sulfotransferase activity	MF	14	3	0.132143	1
GO:0072525	pyridine-containing compound biosynthetic process	BP	33	4	0.132193	1
GO:2000347	positive regulation of hepatocyte proliferation	BP	7	2	0.132217	1
GO:0002063	chondrocyte development	BP	25	5	0.132239	1
GO:0015734	taurine transport	BP	1	1	0.132337	1
GO:0042918	alkanesulfonate transport	BP	1	1	0.132337	1
GO:0005368	taurine transmembrane transporter activity	MF	1	1	0.132337	1
GO:0005369	taurine:sodium symporter activity	MF	1	1	0.132337	1
GO:0042959	alkanesulfonate transporter activity	MF	1	1	0.132337	1
GO:1902237	positive regulation of endoplasmic reticulum stress-induced intrinsic apoptotic signaling pathway	BP	10	2	0.132368	1
GO:0034433	steroid esterification	BP	14	2	0.13263	1
GO:0034434	sterol esterification	BP	14	2	0.13263	1
GO:0034435	cholesterol esterification	BP	14	2	0.13263	1
GO:0035425	autocrine signaling	BP	3	1	0.132641	1
GO:0042130	negative regulation of T cell proliferation	BP	48	5	0.132718	1
GO:0006525	arginine metabolic process	BP	16	3	0.132924	1
GO:0085029	extracellular matrix assembly	BP	26	5	0.133344	1
GO:0099600	transmembrane receptor activity	MF	1150	70	0.133439	1
GO:1901292	nucleoside phosphate catabolic process	BP	69	8	0.133729	1
GO:0055025	positive regulation of cardiac muscle tissue development	BP	40	7	0.133881	1
GO:0048806	genitalia development	BP	44	6	0.133913	1
GO:0060911	cardiac cell fate commitment	BP	12	3	0.134041	1
GO:0048678	response to axon injury	BP	62	8	0.134102	1
GO:0034654	nucleobase-containing compound biosynthetic process	BP	4037	312	0.134232	1
GO:0070306	lens fiber cell differentiation	BP	30	5	0.134267	1
GO:0061099	negative regulation of protein tyrosine kinase activity	BP	24	4	0.134295	1
GO:0010517	regulation of phospholipase activity	BP	59	7	0.134369	1
GO:0032101	regulation of response to external stimulus	BP	657	54	0.134653	1
GO:0071665	gamma-catenin-TCF7L2 complex	CC	1	1	0.134902	1
GO:0005199	structural constituent of cell wall	MF	1	1	0.134902	1
GO:1904929	coreceptor activity involved in Wnt signaling pathway, planar cell polarity pathway	MF	5	2	0.135036	1
GO:0009415	response to water	BP	14	3	0.135271	1
GO:1901032	negative regulation of response to reactive oxygen species	BP	17	3	0.135482	1
GO:1903206	negative regulation of hydrogen peroxide-induced cell death	BP	17	3	0.135482	1
GO:0050851	antigen receptor-mediated signaling pathway	BP	197	18	0.135625	1
GO:0030173	integral component of Golgi membrane	CC	53	7	0.135634	1
GO:0033363	secretory granule organization	BP	31	4	0.135714	1
GO:0019840	isoprenoid binding	MF	33	5	0.135752	1
GO:0000110	nucleotide-excision repair factor 1 complex	CC	3	1	0.135818	1
GO:0044087	regulation of cellular component biogenesis	BP	762	72	0.135966	1
GO:0097381	photoreceptor disc membrane	CC	18	3	0.136156	1
GO:0043406	positive regulation of MAP kinase activity	BP	208	22	0.136212	1
GO:0001958	endochondral ossification	BP	26	5	0.136237	1
GO:0036075	replacement ossification	BP	26	5	0.136237	1
GO:0005667	transcription factor complex	CC	294	31	0.136272	1
GO:0070830	bicellular tight junction assembly	BP	47	6	0.136282	1
GO:0070538	oleic acid binding	MF	2	1	0.136317	1
GO:0042402	cellular biogenic amine catabolic process	BP	23	3	0.136383	1
GO:2000739	regulation of mesenchymal stem cell differentiation	BP	6	2	0.136649	1
GO:0001953	negative regulation of cell-matrix adhesion	BP	28	5	0.136704	1
GO:2000586	regulation of platelet-derived growth factor receptor-beta signaling pathway	BP	10	3	0.136805	1
GO:0014891	striated muscle atrophy	BP	9	2	0.136837	1
GO:0005585	collagen type II trimer	CC	1	1	0.13684	1
GO:0030033	microvillus assembly	BP	15	3	0.137208	1
GO:1904235	regulation of substrate-dependent cell migration, cell attachment to substrate	BP	1	1	0.137311	1
GO:1904237	positive regulation of substrate-dependent cell migration, cell attachment to substrate	BP	1	1	0.137311	1
GO:0006563	L-serine metabolic process	BP	10	2	0.137424	1
GO:1904199	positive regulation of regulation of vascular smooth muscle cell membrane depolarization	BP	1	1	0.13827	1
GO:1990736	regulation of vascular smooth muscle cell membrane depolarization	BP	1	1	0.13827	1
GO:0061141	lung ciliated cell differentiation	BP	3	1	0.138324	1
GO:0000917	barrier septum assembly	BP	1	1	0.138453	1
GO:0090529	cell septum assembly	BP	1	1	0.138453	1
GO:0072049	comma-shaped body morphogenesis	BP	6	2	0.138468	1
GO:0044441	ciliary part	CC	370	31	0.138472	1
GO:0005581	collagen trimer	CC	84	10	0.138645	1
GO:0032677	regulation of interleukin-8 production	BP	57	6	0.138678	1
GO:0042698	ovulation cycle	BP	101	11	0.138685	1
GO:0060325	face morphogenesis	BP	28	5	0.138694	1
GO:0003198	epithelial to mesenchymal transition involved in endocardial cushion formation	BP	17	3	0.138887	1
GO:0016362	activin receptor activity, type II	MF	2	1	0.138967	1
GO:1905208	negative regulation of cardiocyte differentiation	BP	14	3	0.139072	1
GO:0070460	thyroid-stimulating hormone secretion	BP	1	1	0.139164	1
GO:2000612	regulation of thyroid-stimulating hormone secretion	BP	1	1	0.139164	1
GO:0051410	detoxification of nitrogen compound	BP	5	1	0.139334	1
GO:0021521	ventral spinal cord interneuron specification	BP	10	3	0.13935	1
GO:0060573	cell fate specification involved in pattern specification	BP	10	3	0.13935	1
GO:0016520	growth hormone-releasing hormone receptor activity	MF	4	1	0.139459	1
GO:0097363	protein O-GlcNAc transferase activity	MF	1	1	0.139488	1
GO:0010990	regulation of SMAD protein complex assembly	BP	6	2	0.139579	1
GO:0097059	CNTFR-CLCF1 complex	CC	2	1	0.139716	1
GO:1905331	negative regulation of morphogenesis of an epithelium	BP	17	4	0.139929	1
GO:0060374	mast cell differentiation	BP	5	2	0.139932	1
GO:0008206	bile acid metabolic process	BP	45	5	0.139962	1
GO:0099623	regulation of cardiac muscle cell membrane repolarization	BP	21	4	0.140063	1
GO:0045582	positive regulation of T cell differentiation	BP	70	8	0.140319	1
GO:0086023	adrenergic receptor signaling pathway involved in heart process	BP	6	2	0.140406	1
GO:0036323	vascular endothelial growth factor receptor-1 signaling pathway	BP	1	1	0.140497	1
GO:0036326	VEGF-A-activated receptor activity	MF	1	1	0.140497	1
GO:0036327	VEGF-B-activated receptor activity	MF	1	1	0.140497	1
GO:0036332	placental growth factor-activated receptor activity	MF	1	1	0.140497	1
GO:1902957	negative regulation of mitochondrial electron transport, NADH to ubiquinone	BP	2	1	0.140582	1
GO:1905447	negative regulation of mitochondrial ATP synthesis coupled electron transport	BP	2	1	0.140582	1
GO:0051968	positive regulation of synaptic transmission, glutamatergic	BP	19	4	0.140617	1
GO:0048486	parasympathetic nervous system development	BP	17	4	0.140811	1
GO:0060080	inhibitory postsynaptic potential	BP	13	3	0.14083	1
GO:0072170	metanephric tubule development	BP	22	4	0.140987	1
GO:0005604	basement membrane	CC	87	12	0.141053	1
GO:0005546	phosphatidylinositol-4,5-bisphosphate binding	MF	54	7	0.141345	1
GO:0001553	luteinization	BP	10	2	0.141468	1
GO:1901897	regulation of relaxation of cardiac muscle	BP	7	2	0.141509	1
GO:0015880	coenzyme A transport	BP	2	1	0.141648	1
GO:0035349	coenzyme A transmembrane transport	BP	2	1	0.141648	1
GO:0071106	adenosine 3',5'-bisphosphate transmembrane transport	BP	2	1	0.141648	1
GO:0080121	AMP transport	BP	2	1	0.141648	1
GO:0015228	coenzyme A transmembrane transporter activity	MF	2	1	0.141648	1
GO:0071077	adenosine 3',5'-bisphosphate transmembrane transporter activity	MF	2	1	0.141648	1
GO:0080122	AMP transmembrane transporter activity	MF	2	1	0.141648	1
GO:0060842	arterial endothelial cell differentiation	BP	6	2	0.141705	1
GO:0045494	photoreceptor cell maintenance	BP	35	5	0.141725	1
GO:0003167	atrioventricular bundle cell differentiation	BP	1	1	0.141823	1
GO:0051431	corticotropin-releasing hormone receptor 2 binding	MF	4	1	0.141882	1
GO:0045504	dynein heavy chain binding	MF	4	1	0.141923	1
GO:0010799	regulation of peptidyl-threonine phosphorylation	BP	38	6	0.141939	1
GO:0008356	asymmetric cell division	BP	16	3	0.141997	1
GO:0098920	retrograde trans-synaptic signaling by lipid	BP	1	1	0.142003	1
GO:0098921	retrograde trans-synaptic signaling by endocannabinoid	BP	1	1	0.142003	1
GO:0010518	positive regulation of phospholipase activity	BP	50	6	0.142064	1
GO:0010730	negative regulation of hydrogen peroxide biosynthetic process	BP	2	1	0.142278	1
GO:0014842	regulation of skeletal muscle satellite cell proliferation	BP	9	2	0.142338	1
GO:0071527	semaphorin-plexin signaling pathway involved in outflow tract morphogenesis	BP	1	1	0.142422	1
GO:2000763	positive regulation of transcription from RNA polymerase II promoter involved in norepinephrine biosynthetic process	BP	1	1	0.142422	1
GO:2000764	positive regulation of semaphorin-plexin signaling pathway involved in outflow tract morphogenesis	BP	1	1	0.142422	1
GO:2001260	regulation of semaphorin-plexin signaling pathway	BP	1	1	0.142422	1
GO:2001262	positive regulation of semaphorin-plexin signaling pathway	BP	1	1	0.142422	1
GO:0051174	regulation of phosphorus metabolic process	BP	1542	129	0.142485	1
GO:0009720	detection of hormone stimulus	BP	1	1	0.142502	1
GO:0035853	chromosome passenger complex localization to spindle midzone	BP	1	1	0.142602	1
GO:0086009	membrane repolarization	BP	39	6	0.142637	1
GO:0031102	neuron projection regeneration	BP	49	7	0.14276	1
GO:1903169	regulation of calcium ion transmembrane transport	BP	118	13	0.142917	1
GO:0032226	positive regulation of synaptic transmission, dopaminergic	BP	7	2	0.142972	1
GO:0060964	regulation of gene silencing by miRNA	BP	28	5	0.142973	1
GO:0004743	pyruvate kinase activity	MF	2	1	0.14316	1
GO:0051249	regulation of lymphocyte activation	BP	371	31	0.143425	1
GO:0014704	intercalated disc	CC	45	6	0.143569	1
GO:0032449	CBM complex	CC	3	1	0.143569	1
GO:0032753	positive regulation of interleukin-4 production	BP	18	3	0.143572	1
GO:0036304	umbilical cord morphogenesis	BP	2	1	0.143738	1
GO:0061027	umbilical cord development	BP	2	1	0.143738	1
GO:2000820	negative regulation of transcription from RNA polymerase II promoter involved in smooth muscle cell differentiation	BP	2	1	0.143738	1
GO:2000112	regulation of cellular macromolecule biosynthetic process	BP	3690	290	0.143758	1
GO:0051961	negative regulation of nervous system development	BP	247	30	0.143769	1
GO:0001626	nociceptin receptor activity	MF	1	1	0.143776	1
GO:0071393	cellular response to progesterone stimulus	BP	1	1	0.144153	1
GO:0032444	activin responsive factor complex	CC	3	1	0.144211	1
GO:0051492	regulation of stress fiber assembly	BP	68	9	0.144299	1
GO:0045995	regulation of embryonic development	BP	114	15	0.14456	1
GO:0035743	CD4-positive, alpha-beta T cell cytokine production	BP	11	2	0.144699	1
GO:0003223	ventricular compact myocardium morphogenesis	BP	7	2	0.14481	1
GO:0035136	forelimb morphogenesis	BP	38	7	0.144983	1
GO:0036315	cellular response to sterol	BP	16	3	0.145081	1
GO:1990439	MAP kinase threonine phosphatase activity	MF	1	1	0.145161	1
GO:1901731	positive regulation of platelet aggregation	BP	1	1	0.145181	1
GO:0031143	pseudopodium	CC	15	3	0.145323	1
GO:0001716	L-amino-acid oxidase activity	MF	1	1	0.145378	1
GO:0033084	regulation of immature T cell proliferation in thymus	BP	5	2	0.145421	1
GO:0052047	interaction with other organism via secreted substance involved in symbiotic interaction	BP	2	1	0.145902	1
GO:1900245	positive regulation of MDA-5 signaling pathway	BP	4	1	0.145903	1
GO:0019320	hexose catabolic process	BP	48	6	0.146317	1
GO:0048495	Roundabout binding	MF	5	2	0.146498	1
GO:0014839	myoblast migration involved in skeletal muscle regeneration	BP	2	1	0.146518	1
GO:0021541	ammon gyrus development	BP	1	1	0.146539	1
GO:1990430	extracellular matrix protein binding	MF	4	1	0.146658	1
GO:2001202	negative regulation of transforming growth factor-beta secretion	BP	2	1	0.146744	1
GO:1903943	regulation of hepatocyte apoptotic process	BP	1	1	0.146755	1
GO:1903944	negative regulation of hepatocyte apoptotic process	BP	1	1	0.146755	1
GO:0002461	tolerance induction dependent upon immune response	BP	2	1	0.146864	1
GO:0006044	N-acetylglucosamine metabolic process	BP	14	2	0.147002	1
GO:1901386	negative regulation of voltage-gated calcium channel activity	BP	12	2	0.147061	1
GO:0009786	regulation of asymmetric cell division	BP	3	1	0.147187	1
GO:0007037	vacuolar phosphate transport	BP	1	1	0.147206	1
GO:1903465	positive regulation of mitotic cell cycle DNA replication	BP	1	1	0.147206	1
GO:2000830	positive regulation of parathyroid hormone secretion	BP	1	1	0.147206	1
GO:0006942	regulation of striated muscle contraction	BP	80	10	0.147207	1
[truncated: 19,682 more rows]

## Sheet: KEGG pathways
KEGG	desc	N	DE	P.DE	FDR
4520	Adherens junction	72	16	0.000401747	0.128961
5200	Pathways in cancer	395	52	0.00116932	0.187676
534	Glycosaminoglycan biosynthesis - heparan sulfate / heparin	24	6	0.00263345	0.281779
510	N-Glycan biosynthesis	49	8	0.00445781	0.336792
120	Primary bile acid biosynthesis	17	3	0.00524598	0.336792
5218	Melanoma	76	13	0.0072115	0.385815
4350	TGF-beta signaling pathway	84	12	0.00999909	0.458529
780	Biotin metabolism	3	1	0.0158443	0.527165
472	D-Arginine and D-ornithine metabolism	1	0	0.0160777	0.527165
5217	Basal cell carcinoma	63	11	0.0167934	0.527165
4015	Rap1 signaling pathway	210	27	0.0211228	0.527165
4550	Signaling pathways regulating pluripotency of stem cells	139	19	0.0226599	0.527165
290	Valine, leucine and isoleucine biosynthesis	4	1	0.0227098	0.527165
515	Mannose type O-glycan biosynthesis	23	4	0.0235003	0.527165
533	Glycosaminoglycan biosynthesis - keratan sulfate	14	3	0.0246339	0.527165
4340	Hedgehog signaling pathway	47	8	0.0291497	0.575079
400	Phenylalanine, tyrosine and tryptophan biosynthesis	5	1	0.0333529	0.575079
4390	Hippo signaling pathway	154	21	0.0366409	0.575079
5100	Bacterial invasion of epithelial cells	76	11	0.0370248	0.575079
5202	Transcriptional misregulation in cancer	186	22	0.0373191	0.575079
4510	Focal adhesion	199	25	0.0388601	0.575079
4710	Circadian rhythm	31	5	0.0394135	0.575079
750	Vitamin B6 metabolism	6	1	0.0508757	0.635641
4974	Protein digestion and absorption	90	10	0.0537283	0.635641
1521	EGFR tyrosine kinase inhibitor resistance	79	12	0.0541885	0.635641
4360	Axon guidance	175	24	0.0554283	0.635641
3320	PPAR signaling pathway	72	7	0.0559415	0.635641
4014	Ras signaling pathway	227	25	0.057543	0.635641
1524	Platinum drug resistance	73	8	0.058687	0.635641
380	Tryptophan metabolism	40	4	0.0594057	0.635641
4392	Hippo signaling pathway - multiple species	29	5	0.0658243	0.650382
4151	PI3K-Akt signaling pathway	342	34	0.0675187	0.650382
5412	Arrhythmogenic right ventricular cardiomyopathy (ARVC)	72	10	0.0682058	0.650382
920	Sulfur metabolism	10	1	0.0695511	0.650382
601	Glycosphingolipid biosynthesis - lacto and neolacto series	27	3	0.0709139	0.650382
450	Selenocompound metabolism	17	2	0.0760074	0.677733
620	Pyruvate metabolism	39	4	0.0833564	0.694446
260	Glycine, serine and threonine metabolism	40	3	0.0847813	0.694446
760	Nicotinate and nicotinamide metabolism	29	3	0.0851221	0.694446
62	Fatty acid elongation	25	3	0.0865353	0.694446
280	Valine, leucine and isoleucine degradation	48	5	0.0896315	0.701749
232	Caffeine metabolism	5	0	0.0961349	0.721207
514	Other types of O-glycan biosynthesis	22	3	0.0996616	0.721207
4640	Hematopoietic cell lineage	97	7	0.10018	0.721207
5205	Proteoglycans in cancer	203	23	0.101813	0.721207
980	Metabolism of xenobiotics by cytochrome P450	74	5	0.104509	0.721207
4966	Collecting duct acid secretion	27	3	0.109126	0.721207
4810	Regulation of actin cytoskeleton	212	22	0.109821	0.721207
471	D-Glutamine and D-glutamate metabolism	4	0	0.111172	0.721207
4010	MAPK signaling pathway	255	27	0.11257	0.721207
5221	Acute myeloid leukemia	66	8	0.114584	0.721207
561	Glycerolipid metabolism	61	6	0.118045	0.721703
532	Glycosaminoglycan biosynthesis - chondroitin sulfate / dermatan sulfate	20	3	0.120687	0.721703
5204	Chemical carcinogenesis	82	5	0.124705	0.721703
4530	Tight junction	170	16	0.126436	0.721703
5216	Thyroid cancer	37	5	0.126521	0.721703
4512	ECM-receptor interaction	82	10	0.129347	0.721703
5144	Malaria	49	4	0.130767	0.721703
982	Drug metabolism - cytochrome P450	70	4	0.132969	0.721703
590	Arachidonic acid metabolism	62	4	0.134898	0.721703
4659	Th17 cell differentiation	107	10	0.143091	0.748455
5418	Fluid shear stress and atherosclerosis	139	12	0.145379	0.748455
640	Propanoate metabolism	32	3	0.147153	0.748455
5340	Primary immunodeficiency	37	3	0.152823	0.748455
410	beta-Alanine metabolism	31	3	0.155966	0.748455
770	Pantothenate and CoA biosynthesis	18	2	0.162625	0.748455
4950	Maturity onset diabetes of the young	26	3	0.162765	0.748455
340	Histidine metabolism	24	2	0.163207	0.748455
5130	Pathogenic Escherichia coli infection	55	5	0.164184	0.748455
270	Cysteine and methionine metabolism	45	4	0.16431	0.748455
785	Lipoic acid metabolism	3	0	0.165546	0.748455
4975	Fat digestion and absorption	41	3	0.179803	0.801624
430	Taurine and hypotaurine metabolism	11	1	0.184022	0.803662
5224	Breast cancer	151	17	0.185268	0.803662
910	Nitrogen metabolism	17	1	0.190431	0.815043
5321	Inflammatory bowel disease (IBD)	65	5	0.201722	0.852009
512	Mucin type O-glycan biosynthesis	31	3	0.204377	0.852012
531	Glycosaminoglycan degradation	19	2	0.209927	0.860506
603	Glycosphingolipid biosynthesis - globo and isoglobo series	15	1	0.212785	0.860506
71	Fatty acid degradation	44	3	0.218277	0.860506
480	Glutathione metabolism	54	3	0.218831	0.860506
4514	Cell adhesion molecules (CAMs)	145	12	0.219818	0.860506
51	Fructose and mannose metabolism	33	3	0.231229	0.89427
4060	Cytokine-cytokine receptor interaction	270	13	0.238917	0.9094
3450	Non-homologous end-joining	13	1	0.242995	0.9094
5146	Amoebiasis	96	8	0.24364	0.9094
61	Fatty acid biosynthesis	13	1	0.24881	0.918025
591	Linoleic acid metabolism	29	1	0.252945	0.922492
5132	Salmonella infection	86	6	0.263302	0.922492
100	Steroid biosynthesis	20	1	0.263455	0.922492
5215	Prostate cancer	97	10	0.270349	0.922492
1210	2-Oxocarboxylic acid metabolism	18	1	0.277987	0.922492
5032	Morphine addiction	91	10	0.279845	0.922492
564	Glycerophospholipid metabolism	97	8	0.280517	0.922492
5230	Central carbon metabolism in cancer	65	7	0.282265	0.922492
4920	Adipocytokine signaling pathway	69	6	0.282741	0.922492
5206	MicroRNAs in cancer	299	20	0.283289	0.922492
360	Phenylalanine metabolism	17	1	0.283816	0.922492
5212	Pancreatic cancer	75	7	0.284507	0.922492
5225	Hepatocellular carcinoma	168	16	0.287804	0.923851
562	Inositol phosphate metabolism	73	6	0.301194	0.957261
5120	Epithelial cell signaling in Helicobacter pylori infection	68	5	0.314575	0.989987
1212	Fatty acid metabolism	48	4	0.325566	0.999871
592	alpha-Linolenic acid metabolism	25	1	0.326843	0.999871
4122	Sulfur relay system	8	0	0.336426	0.999871
5210	Colorectal cancer	72	7	0.339982	0.999871
440	Phosphonate and phosphinate metabolism	6	0	0.342325	0.999871
4215	Apoptosis - multiple species	33	2	0.343842	0.999871
130	Ubiquinone and other terpenoid-quinone biosynthesis	11	0	0.347773	0.999871
220	Arginine biosynthesis	21	1	0.359185	0.999871
5220	Chronic myeloid leukemia	78	7	0.366765	0.999871
520	Amino sugar and nucleotide sugar metabolism	48	3	0.369934	0.999871
5410	Hypertrophic cardiomyopathy (HCM)	83	7	0.37112	0.999871
1230	Biosynthesis of amino acids	74	4	0.371488	0.999871
740	Riboflavin metabolism	8	0	0.371801	0.999871
563	Glycosylphosphatidylinositol (GPI)-anchor biosynthesis	25	1	0.37341	0.999871
5162	Measles	134	8	0.374711	0.999871
970	Aminoacyl-tRNA biosynthesis	66	3	0.377695	0.999871
4964	Proximal tubule bicarbonate reclamation	23	1	0.382321	0.999871
2010	ABC transporters	45	3	0.387532	0.999871
4070	Phosphatidylinositol signaling system	99	8	0.40033	0.999871
5222	Small cell lung cancer	93	8	0.400484	0.999871
4152	AMPK signaling pathway	121	11	0.410645	0.999871
5142	Chagas disease (American trypanosomiasis)	102	7	0.410863	0.999871
4136	Autophagy - other	32	2	0.412303	0.999871
5150	Staphylococcus aureus infection	56	2	0.42142	0.999871
4066	HIF-1 signaling pathway	100	8	0.422894	0.999871
4978	Mineral absorption	51	2	0.424433	0.999871
72	Synthesis and degradation of ketone bodies	10	0	0.427082	0.999871
230	Purine metabolism	175	12	0.438638	0.999871
524	Neomycin, kanamycin and gentamicin biosynthesis	5	0	0.441988	0.999871
5310	Asthma	31	1	0.443891	0.999871
4744	Phototransduction	28	1	0.449913	0.999871
250	Alanine, aspartate and glutamate metabolism	35	2	0.450088	0.999871
53	Ascorbate and aldarate metabolism	27	1	0.45174	0.999871
5131	Shigellosis	65	4	0.456016	0.999871
5145	Toxoplasmosis	113	8	0.457743	0.999871
4977	Vitamin digestion and absorption	24	1	0.463029	0.999871
4913	Ovarian steroidogenesis	50	3	0.468812	0.999871
20	Citrate cycle (TCA cycle)	30	1	0.46977	0.999871
330	Arginine and proline metabolism	50	2	0.47632	0.999871
5211	Renal cell carcinoma	69	5	0.480277	0.999871
983	Drug metabolism - other enzymes	46	2	0.481174	0.999871
4330	Notch signaling pathway	48	4	0.486275	0.999871
650	Butanoate metabolism	28	1	0.48927	0.999871
5030	Cocaine addiction	49	4	0.4904	0.999871
10	Glycolysis / Gluconeogenesis	68	3	0.491093	0.999871
1100	Metabolic pathways	1272	75	0.498142	0.999871
4668	TNF signaling pathway	108	7	0.504969	0.999871
4260	Cardiac muscle contraction	78	4	0.506233	0.999871
4213	Longevity regulating pathway - multiple species	62	5	0.508554	0.999871
4210	Apoptosis	138	9	0.517492	0.999871
5219	Bladder cancer	41	3	0.522573	0.999871
4310	Wnt signaling pathway	143	12	0.529562	0.999871
140	Steroid hormone biosynthesis	58	2	0.534565	0.999871
5020	Prion diseases	35	1	0.534755	0.999871
4670	Leukocyte transendothelial migration	112	7	0.540603	0.999871
5213	Endometrial cancer	58	5	0.544054	0.999871
1040	Biosynthesis of unsaturated fatty acids	23	1	0.54517	0.999871
830	Retinol metabolism	65	2	0.546815	0.999871
310	Lysine degradation	59	4	0.550628	0.999871
500	Starch and sucrose metabolism	36	1	0.560758	0.999871
4658	Th1 and Th2 cell differentiation	92	6	0.561102	0.999871
1523	Antifolate resistance	31	1	0.567786	0.999871
4914	Progesterone-mediated oocyte maturation	99	6	0.569108	0.999871
4922	Glucagon signaling pathway	103	6	0.569774	0.999871
5143	African trypanosomiasis	35	1	0.579295	0.999871
5160	Hepatitis C	131	7	0.580236	0.999871
350	Tyrosine metabolism	35	1	0.581503	0.999871
4130	SNARE interactions in vesicular transport	34	1	0.584395	0.999871
4141	Protein processing in endoplasmic reticulum	166	9	0.584737	0.999871
5231	Choline metabolism in cancer	99	7	0.592753	0.999871
4211	Longevity regulating pathway	89	7	0.592841	0.999871
4915	Estrogen signaling pathway	98	8	0.593724	0.999871
4940	Type I diabetes mellitus	43	2	0.608678	0.999871
5203	Viral carcinogenesis	201	13	0.610103	0.999871
4120	Ubiquitin mediated proteolysis	137	8	0.61132	0.999871
5332	Graft-versus-host disease	41	1	0.615424	0.999871
4911	Insulin secretion	85	6	0.631057	0.999871
4660	T cell receptor signaling pathway	103	6	0.632052	0.999871
5330	Allograft rejection	38	1	0.63235	0.999871
40	Pentose and glucuronate interconversions	34	1	0.639309	0.999871
52	Galactose metabolism	31	1	0.640865	0.999871
4960	Aldosterone-regulated sodium reabsorption	37	2	0.643774	0.999871
4614	Renin-angiotensin system	23	0	0.648719	0.999871
4931	Insulin resistance	107	7	0.649747	0.999871
5223	Non-small cell lung cancer	66	5	0.654608	0.999871
4742	Taste transduction	83	3	0.660367	0.999871
4727	GABAergic synapse	88	6	0.660374	0.999871
5414	Dilated cardiomyopathy (DCM)	90	6	0.661925	0.999871
4610	Complement and coagulation cascades	79	2	0.677207	0.999871
4612	Antigen processing and presentation	77	3	0.677672	0.999871
5214	Glioma	71	5	0.678035	0.999871
4917	Prolactin signaling pathway	70	4	0.678984	0.999871
4012	ErbB signaling pathway	86	6	0.683591	0.999871
730	Thiamine metabolism	16	0	0.687146	0.999871
4925	Aldosterone synthesis and secretion	82	6	0.687857	0.999871
4919	Thyroid hormone signaling pathway	116	8	0.692064	0.999871
4672	Intestinal immune network for IgA production	49	1	0.696463	0.999871
4146	Peroxisome	83	3	0.698267	0.999871
5320	Autoimmune thyroid disease	53	1	0.700363	0.999871
3015	mRNA surveillance pathway	91	4	0.706919	0.999871
3060	Protein export	23	0	0.710272	0.999871
3018	RNA degradation	79	3	0.714541	0.999871
5134	Legionellosis	55	2	0.730862	0.999871
670	One carbon pool by folate	20	0	0.733551	0.999871
790	Folate biosynthesis	26	0	0.734636	0.999871
5165	Human papillomavirus infection	319	24	0.734984	0.999871
4664	Fc epsilon RI signaling pathway	68	3	0.739744	0.999871
4216	Ferroptosis	40	1	0.739869	0.999871
5110	Vibrio cholerae infection	50	2	0.740064	0.999871
4064	NF-kappa B signaling pathway	95	4	0.742846	0.999871
4976	Bile secretion	71	3	0.74384	0.999871
5323	Rheumatoid arthritis	90	3	0.746201	0.999871
565	Ether lipid metabolism	45	1	0.749979	0.999871
4150	mTOR signaling pathway	151	10	0.75492	0.999871
4910	Insulin signaling pathway	138	8	0.755564	0.999871
4611	Platelet activation	123	7	0.757592	0.999871
900	Terpenoid backbone biosynthesis	22	0	0.758061	0.999871
4926	Relaxin signaling pathway	130	8	0.758999	0.999871
4750	Inflammatory mediator regulation of TRP channels	97	6	0.759103	0.999871
3440	Homologous recombination	41	1	0.759277	0.999871
3420	Nucleotide excision repair	47	1	0.759837	0.999871
4261	Adrenergic signaling in cardiomyocytes	144	9	0.760036	0.999871
5322	Systemic lupus erythematosus	133	3	0.761007	0.999871
4972	Pancreatic secretion	96	4	0.761625	0.999871
4725	Cholinergic synapse	112	8	0.761909	0.999871
3022	Basal transcription factors	45	1	0.767847	0.999871
4020	Calcium signaling pathway	182	12	0.768677	0.999871
4068	FoxO signaling pathway	132	7	0.777199	0.999871
3430	Mismatch repair	23	0	0.778502	0.999871
630	Glyoxylate and dicarboxylate metabolism	28	0	0.778791	0.999871
511	Other glycan degradation	18	0	0.784637	0.999871
4973	Carbohydrate digestion and absorption	44	1	0.788152	0.999871
604	Glycosphingolipid biosynthesis - ganglio series	15	0	0.791206	0.999871
4115	p53 signaling pathway	68	3	0.803065	0.999871
4062	Chemokine signaling pathway	185	9	0.805988	0.999871
4270	Vascular smooth muscle contraction	121	6	0.810581	0.999871
30	Pentose phosphate pathway	30	0	0.812088	0.999871
4110	Cell cycle	124	6	0.813176	0.999871
4622	RIG-I-like receptor signaling pathway	70	1	0.813332	0.999871
4933	AGE-RAGE signaling pathway in diabetic complications	99	5	0.813787	0.999871
5166	HTLV-I infection	255	16	0.820046	0.999871
5416	Viral myocarditis	59	2	0.821112	0.999871
4962	Vasopressin-regulated water reabsorption	44	1	0.821966	0.999871
4380	Osteoclast differentiation	128	5	0.822006	0.999871
1522	Endocrine resistance	96	6	0.822612	0.999871
4144	Endocytosis	244	15	0.824818	0.999871
600	Sphingolipid metabolism	47	1	0.826158	0.999871
4114	Oocyte meiosis	124	5	0.835542	0.999871
5031	Amphetamine addiction	68	3	0.84637	0.999871
3020	RNA polymerase	32	0	0.854367	0.999871
4217	Necroptosis	164	5	0.85542	0.999871
240	Pyrimidine metabolism	102	3	0.855471	0.999871
5161	Hepatitis B	144	7	0.855935	0.999871
5033	Nicotine addiction	40	1	0.85651	0.999871
3460	Fanconi anemia pathway	55	1	0.856667	0.999871
4923	Regulation of lipolysis in adipocytes	54	2	0.860735	0.999871
4918	Thyroid hormone synthesis	74	3	0.861993	0.999871
4540	Gap junction	88	4	0.863293	0.999871
4137	Mitophagy - animal	65	2	0.865043	0.999871
3410	Base excision repair	33	0	0.866818	0.999871
4722	Neurotrophin signaling pathway	119	6	0.867471	0.999871
4930	Type II diabetes mellitus	46	2	0.87078	0.999871
4740	Olfactory transduction	419	4	0.87554	0.999871
4650	Natural killer cell mediated cytotoxicity	133	4	0.878085	0.999871
4728	Dopaminergic synapse	130	7	0.884117	0.999871
4370	VEGF signaling pathway	59	2	0.888201	0.999871
4620	Toll-like receptor signaling pathway	104	2	0.890578	0.999871
1200	Carbon metabolism	116	3	0.893272	0.999871
4140	Autophagy - animal	128	6	0.894805	0.999871
4730	Long-term depression	60	2	0.898086	0.999871
5167	Kaposi's sarcoma-associated herpesvirus infection	186	8	0.900235	0.999871
4623	Cytosolic DNA-sensing pathway	64	0	0.903152	0.999871
3030	DNA replication	36	0	0.904042	0.999871
4961	Endocrine and other factor-regulated calcium reabsorption	47	1	0.904869	0.999871
4932	Non-alcoholic fatty liver disease (NAFLD)	149	5	0.906315	0.999871
4726	Serotonergic synapse	113	4	0.907821	0.999871
5133	Pertussis	76	1	0.908171	0.999871
4218	Cellular senescence	160	8	0.908962	0.999871
860	Porphyrin and chlorophyll metabolism	42	0	0.909895	0.999871
4662	B cell receptor signaling pathway	71	2	0.910878	0.999871
3008	Ribosome biogenesis in eukaryotes	106	1	0.914427	0.999871
4713	Circadian entrainment	96	5	0.914777	0.999871
4080	Neuroactive ligand-receptor interaction	278	11	0.91503	0.999871
5152	Tuberculosis	179	6	0.917158	0.999871
5016	Huntington's disease	193	7	0.917247	0.999871
4142	Lysosome	123	4	0.925844	0.999871
5034	Alcoholism	180	6	0.926335	0.999871
5140	Leishmaniasis	74	1	0.926463	0.999871
4071	Sphingolipid signaling pathway	118	5	0.928262	0.999871
4921	Oxytocin signaling pathway	153	8	0.930019	0.999871
3050	Proteasome	45	0	0.931406	0.999871
4024	cAMP signaling pathway	198	10	0.931515	0.999871
4072	Phospholipase D signaling pathway	146	8	0.933672	0.999871
4912	GnRH signaling pathway	92	3	0.935404	0.999871
5014	Amyotrophic lateral sclerosis (ALS)	51	1	0.936146	0.999871
5164	Influenza A	173	5	0.940491	0.999871
4916	Melanogenesis	101	4	0.948013	0.999871
4666	Fc gamma R-mediated phagocytosis	91	3	0.952938	0.999871
4657	IL-17 signaling pathway	93	1	0.95409	0.999871
4145	Phagosome	152	4	0.957228	0.999871
190	Oxidative phosphorylation	133	2	0.96193	0.999871
4630	Jak-STAT signaling pathway	156	3	0.962592	0.999871
3010	Ribosome	154	2	0.964541	0.999871
4724	Glutamatergic synapse	114	5	0.964863	0.999871
4721	Synaptic vesicle cycle	63	1	0.967008	0.999871
4371	Apelin signaling pathway	137	5	0.969851	0.999871
4720	Long-term potentiation	67	1	0.977433	0.999871
5169	Epstein-Barr virus infection	203	7	0.981543	0.999871
4723	Retrograde endocannabinoid signaling	148	4	0.985176	0.999871
4970	Salivary secretion	90	1	0.986861	0.999871
5168	Herpes simplex infection	185	4	0.988828	0.999871
4971	Gastric acid secretion	75	1	0.991995	0.999871
4924	Renin secretion	65	0	0.99301	0.999871
4022	cGMP-PKG signaling pathway	163	5	0.994359	0.999871
3040	Spliceosome	134	1	0.997827	0.999871
4621	NOD-like receptor signaling pathway	168	1	0.998522	0.999871
5010	Alzheimer's disease	171	2	0.999083	0.999871
5012	Parkinson's disease	142	0	0.999461	0.999871
3013	RNA transport	171	0	0.999871	0.999871
